# Supplementary material for: Comparison of various approaches to tagging for the inflectional Slovak language
Source: PeerJ Comput Sci. 2024 May 24;10:e2026. doi: 10.7717/peerj-cs.2026 (PMC11157559; doi:10.7717/peerj-cs.2026)
Supplement: Supplemental Information 2 — Raw data with input words and their specific morphological annotation obtained through various automated tools and reference annotation (alternate file) [file peerj-cs-10-2026-s002.xlsx]

## Sheet: Hárok1
Word	Tagset	PDT_Reference	PDT_RNNTagger	PDT_TreeTagger	PDT_Stanza	PDT_UDPipe2	PDT_MorphoditaOnline	PDT_Morphodita	Literature Style	RNN_01	TreeT_01	Stanza_01	UDPipe2_01	MO_Online_01	MO_01	RNN_02	TreeT_02	Stanza_02	UDPipe2_02	MO_Online_02	MO_02	RNN_03	TreeT_03	Stanza_03	UDPipe2_03	MO_Online_03	MO_03	RNN_04	TreeT_04	Stanza_04	UDPipe2_04	MO_Online_04	MO_04	RNN_05	TreeT_05	Stanza_05	UDPipe2_05	MO_Online_05	MO_05	RNN_08	TreeT_08	Stanza_08	UDPipe2_08	MO_Online_08	MO_08	RNN_09	TreeT_09	Stanza_09	UDPipe2_09
Kde	PD	PY-------------	PY-------------	PY-------------	PY-------------	PY-------------	Db-------------	Db-------------	0	1	1	1	1	0	0	1	1	1	1	0	0
tá	PFfs1	PDFS1----------	PDFS1----------	PDFS1----------	PDFS1----------	PDFS1----------	PDFS1----------	PDFS1----------	0	1	1	1	1	1	1	1	1	1	1	1	1	1	1	1	1	1	1	1	1	1	1	1	1	1	1	1	1	1	1
ľudská	AAfs1x	AAFS1----1-----	AAFS1----1-----	AAFS1----1-----	AAFS1----1-----	AAFS1----1-----	AAFS1----1A----	AAFS1----1A----	0	1	1	1	1	1	1	1	1	1	1	1	1	1	1	1	1	1	1	1	1	1	1	1	1	1	1	1	1	1	1
duša	SSfs1	NNFS1----------	NNFS1----------	NNFS1----------	NNFS1----------	NNFS1----------	NNFS1-----A----	NNFS1-----A----	0	1	1	1	1	1	1	1	1	1	1	1	1	1	1	1	1	1	1	1	1	1	1	1	1	1	1	1	1	1	1
drieme	VKesc+	VB-S---3P-AA---	V--S---3P-AA---	V--S---3P-AA---	V--S---3P-AA---	V--S---3P-AA---	VB-S---3P-AA---	VB-S---3P-AA---	0	1	1	1	1	1	1					1	1							1	1	1	1	1	1							1	1	1	1	1	1	1	1	1	1
Prečo	PD	PY-------------	PY-------------	PY-------------	PY-------------	PY-------------	PY-------------	PY-------------	0	1	1	1	1	1	1	1	1	1	1	1	1
to	PFns4	PDNS4----------	PDNS4----------	PDNS4----------	PDNS4----------	PDNS4----------	PDNS4----------	PDNS4----------	0	1	1	1	1	1	1	1	1	1	1	1	1	1	1	1	1	1	1	1	1	1	1	1	1	1	1	1	1	1	1
tu	T	TT-------------	PY-------------	PY-------------	PY-------------	PY-------------	Db-------------	Db-------------	0	0	0	0	0	0	0	0	0	0	0	0	0
píšem	VKesa+	VB-S---1P-AA---	V--S---1P-AA---	V--S---1P-AA---	V--S---1P-AA---	V--S---1P-AA---	VB-S---1P-AA---	VB-S---1P-AA---	0	1	1	1	1	1	1					1	1							1	1	1	1	1	1							1	1	1	1	1	1	1	1	1	1
Prečo	PD	PY-------------	PY-------------	PY-------------	PY-------------	PY-------------	PY-------------	PY-------------	0	1	1	1	1	1	1	1	1	1	1	1	1
je	VKesc+	VB-S---3P-AA---	V--S---3P-AA---	V--S---3P-AA---	V--S---3P-AA---	V--S---3P-AA---	VB-S---3P-AA---	VB-S---3P-AA---	0	1	1	1	1	1	1					1	1							1	1	1	1	1	1							1	1	1	1	1	1	1	1	1	1
dnešný	AAis1x	AAIS1----1-----	AAIS1----1-----	AAIS1----1-----	AAIS1----1-----	AAIS1----1-----	AAIS1----1A----	AAIS1----1A----	0	1	1	1	1	1	1	1	1	1	1	1	1	1	1	1	1	1	1	1	1	1	1	1	1	1	1	1	1	1	1
humor	SSis1	NNIS1----------	NNIS1----------	NNIS1----------	NNIS1----------	NNIS1----------	NNIS1-----A----	NNIS1-----A----	0	1	1	1	1	1	1	1	1	1	1	1	1	1	1	1	1	1	1	1	1	1	1	1	1	1	1	1	1	1	1
suchý	AAis1x	AAIS1----1-----	AAIS1----1-----	AAIS1----1-----	AAIS1----1-----	AAIS1----1-----	AAIS1----1A----	AAIS1----1A----	0	1	1	1	1	1	1	1	1	1	1	1	1	1	1	1	1	1	1	1	1	1	1	1	1	1	1	1	1	1	1
Aby	OY	J,-------------	J,-------------	J,-------------	J,-------------	J,-------------	J,-------------	J,-------------	0	1	1	1	1	1	1	1	1	1	1	1	1
sa	R	J,-------------	J,-------------	J,-------------	J,-------------	J,-------------	P7-X4----------	P7-X4----------	0	1	1	1	1	0	0	1	1	1	1	0	0
ľudia	SSmp1	NNMP1----------	NNMP1----------	NNMP1----------	NNMP1----------	NNMP1----------	NNMP1-----A----	NNMP1-----A----	0	1	1	1	1	1	1	1	1	1	1	1	1	1	1	1	1	1	1	1	1	1	1	1	1	1	1	1	1	1	1
mohli	VLepcm+	V-MP---3R-AA---	V-MP---3R-AA---	V-MP---3R-AA---	V-MP---3R-AA---	V-MP---3R-AA---	VpXP---XR-AA---	VpXP---XR-AA---	0	1	1	1	1	1	1							1	1	1	1	0	0	1	1	1	1	1	1							1	1	1	1	0	0	1	1	1	1
smiať	VIe+	Vf--------AA---	Vf--------AA---	Vf--------AA---	Vf--------AA---	Vf--------AA---	Vf--------A----	Vf--------A----	0	1	1	1	1	1	1	1	1	1	1	1	1
Prečo	PD	PY-------------	PY-------------	PY-------------	PY-------------	PY-------------	PY-------------	PY-------------	0	1	1	1	1	1	1	1	1	1	1	1	1
niesme	VKepa-:q	VB-P---1P-NA---	V--P---1P-AA---	V--P---1P-NA---	V--P---2P-NA---	V--P---1P-AA---	AAXXX----1A----	X@-------------	0	1	1	1	1	0	0					0	0							1	1	1	1	0								1	1	0	1			1	1	1	1
prirodzení	AAmp1x	AAMP1----1-----	AAMP1----1-----	AAMP1----1-----	AAMP1----1-----	AAMP1----1-----	NNNP2-----A----	NNNP2-----A----	0	1	1	1	1	0	0	1	1	1	1	0	0	1	1	1	1	0	0	1	1	1	1	1	1	1	1	1	1	0	0
Aby	OY	J,-------------	J,-------------	J,-------------	J,-------------	J,-------------	J,-------------	J,-------------	0	1	1	1	1	1	1	1	1	1	1	1	1
nás	PPhp4	PPxP4----------	PPxP4----------	PPxP4----------	PPxP4----------	PPxP4----------	PP-P4--1-------	PP-P4--1-------	0	1	1	1	1	1	1	1	1	1	1	1	1	1	1	1	1			1	1	1	1	1	1	1	1	1	1	1	1
neobvinili	VLdpcm-	V-MP---3R-NN---	V-MP---3R-NN---	V-MP---3R-NN---	V-MP---3R-NN---	V-MP---3R-NN---	VpXP---XR-NA---	VpXP---XR-NA---	0	1	1	1	1	1	1							1	1	1	1	0	0	1	1	1	1	1	1							1	1	1	1	0	0	1	1	1	1
z	Eu2	RR--2----------	RR--2-----------	RR--2-----------	RR--2-----------	RR--2-----------	RR--2----------	RR--2----------	0	1	1	1	1	1	1	1	1	1	1	1	1													1	1	1	1	1	1
farizejstva	SSns2	NNNS2----------	NNNS2----------	NNNS2----------	NNNS2----------	NNNS2----------	NNNS2-----A----	NNNS2-----A----	0	1	1	1	1	1	1	1	1	1	1	1	1	1	1	1	1	1	1	1	1	1	1	1	1	1	1	1	1	1	1
Prečo	PD	PY-------------	PY-------------	PY-------------	PY-------------	PY-------------	PY-------------	PY-------------	0	1	1	1	1	1	1	1	1	1	1	1	1
existuje	VKesc+	VB-S---3P-AA---	V--S---3P-AA---	V--S---3P-AA---	V--S---3P-AA---	V--S---3P-AA---	VB-S---3P-AA---	VB-S---3P-AA---	0	1	1	1	1	1	1					1	1							1	1	1	1	1	1							1	1	1	1	1	1	1	1	1	1
láska	SSfs1	NNFS1----------	NNFS1----------	NNFS1----------	NNFS1----------	NNFS1----------	NNFS1-----A----	NNFS1-----A----	0	1	1	1	1	1	1	1	1	1	1	1	1	1	1	1	1	1	1	1	1	1	1	1	1	1	1	1	1	1	1
Vhodná	AAfs1x	AAFS1----1-----	AAFS1----1-----	AAFS1----1-----	AAFS1----1-----	AAFS1----1-----	AAFS1----1A----	AAFS1----1A----	0	1	1	1	1	1	1	1	1	1	1	1	1	1	1	1	1	1	1	1	1	1	1	1	1	1	1	1	1	1	1
je	VKesc+	VB-S---3P-AA---	V--S---3P-AA---	V--S---3P-AA---	V--S---3P-AA---	V--S---3P-AA---	VB-S---3P-AA---	VB-S---3P-AA---	0	1	1	1	1	1	1					1	1							1	1	1	1	1	1							1	1	1	1	1	1	1	1	1	1
paralela	SSfs1	NNFS1----------	NNFS1----------	NNFS1----------	NNFS1----------	NNFS1----------	NNFS1-----A----	NNFS1-----A----	0	1	1	1	1	1	1	1	1	1	1	1	1	1	1	1	1	1	1	1	1	1	1	1	1	1	1	1	1	1	1
z	Eu2	RR--2----------	RR--2-----------	RR--2-----------	RR--2-----------	RR--2-----------	RR--2----------	RR--2----------	0	1	1	1	1	1	1	1	1	1	1	1	1													1	1	1	1	1	1
čias	SSip2	NNIP2----------	NNIP2----------	NNIP2----------	NNIP2----------	NNIP2----------	XX-------------	XX-------------	0	1	1	1	1	0	0	1	1	1	1	0	0	1	1	1	1			1	1	1	1			1	1	1	1
môjho	PFms2	PDMS2----------	PDMS2----------	PDMS2----------	PDMS2----------	PDMS2----------	PSIS2-S1-------	PSIS2-S1-------	0	1	1	1	1	1	1	1	1	1	1	0	0	1	1	1	1	0	0	1	1	1	1	1	1	1	1	1	1	1	1
starého	AAms2x	AAMS2----1-----	AAMS2----1-----	AAMS2----1-----	AAMS2----1-----	AAMS2----1-----	AAMS2----1A----	AAMS2----1A----	0	1	1	1	1	1	1	1	1	1	1	1	1	1	1	1	1	1	1	1	1	1	1	1	1	1	1	1	1	1	1
otca	SSms2	NNMS2----------	NNMS2----------	NNMS2----------	NNMS2----------	NNMS2----------	NNMS2-----A----	NNMS2-----A----	0	1	1	1	1	1	1	1	1	1	1	1	1	1	1	1	1	1	1	1	1	1	1	1	1	1	1	1	1	1	1
Spustili	VLdpcm+	V-MP---3R-AN---	V-MP---3R-AN---	V-MP---3R-AN---	V-MP---3R-AN---	V-MP---3R-AN---	VpXP---XR-AA---	VpXP---XR-AA---	0	1	1	1	1	1	1							1	1	1	1	0	0	1	1	1	1	1	1							1	1	1	1	0	0	1	1	1	1
novú	AAfs4x	AAFS4----1-----	AAFS4----1-----	AAFS4----1-----	AAFS4----1-----	AAFS4----1-----	AAFS4----1A----	AAFS4----1A----	0	1	1	1	1	1	1	1	1	1	1	1	1	1	1	1	1	1	1	1	1	1	1	1	1	1	1	1	1	1	1
internetovú	AAfs4x	AAFS4----1-----	AAFS4----1-----	AAFS4----1-----	AAFS4----1-----	AAFS4----1-----	AAFS4----1A----	AAFS4----1A----	0	1	1	1	1	1	1	1	1	1	1	1	1	1	1	1	1	1	1	1	1	1	1	1	1	1	1	1	1	1	1
televíziu	SSfs4	NNFS4----------	NNFS4----------	NNFS4----------	NNFS4----------	NNFS4----------	NNFS4-----A----	NNFS4-----A----	0	1	1	1	1	1	1	1	1	1	1	1	1	1	1	1	1	1	1	1	1	1	1	1	1	1	1	1	1	1	1
Braňa	SSms2:r	NNMS2----------	NNMS2----------	NNMS2----------	NNMS2----------	NNMS2----------	NNMS2-----A----	X@-------------	0	1	1	1	1	1	0	1	1	1	1	1	0	1	1	1	1	1		1	1	1	1	1		1	1	1	1	1
Krála	SSms2:rq	NNMS2----------	NNMS2----------	NNMS2----------	NNMS2----------	NNMS2----------	NNMS2-----A----	X@-------------	0	1	1	1	1	1	0	1	1	1	1	1	0	1	1	1	1	1		1	1	1	1	1		1	1	1	1	1
Ľahká	AAfs1x	AAFS1----1-----	AAFS1----1-----	AAFS1----1-----	AAFS1----1-----	AAFS1----1-----	AAFS1----1A----	AAFS1----1A----	0	1	1	1	1	1	1	1	1	1	1	1	1	1	1	1	1	1	1	1	1	1	1	1	1	1	1	1	1	1	1
otázka	SSfs1	NNFS1----------	NNFS1----------	NNFS1----------	NNFS1----------	NNFS1----------	NNFS1-----A----	NNFS1-----A----	0	1	1	1	1	1	1	1	1	1	1	1	1	1	1	1	1	1	1	1	1	1	1	1	1	1	1	1	1	1	1
ťažká	AAfs1x	AAFS1----1-----	AAFS1----1-----	AAFS1----1-----	AAFS1----1-----	AAFS1----1-----	AAFS1----1A----	AAFS1----1A----	0	1	1	1	1	1	1	1	1	1	1	1	1	1	1	1	1	1	1	1	1	1	1	1	1	1	1	1	1	1	1
odpoveď	SSfs1	NNFS1----------	NNFS1----------	NNFS1----------	NNFS1----------	NNFS1----------	NNFS1-----A----	NNFS1-----A----	0	1	1	1	1	1	1	1	1	1	1	1	1	1	1	1	1	1	1	1	1	1	1	1	1	1	1	1	1	1	1
Autobusy	SSip1	NNIP1----------	NNIP1----------	NNIP1----------	NNIP1----------	NNIP1----------	NNIP1-----A----	NNIP1-----A----	0	1	1	1	1	1	1	1	1	1	1	1	1	1	1	1	1	1	1	1	1	1	1	1	1	1	1	1	1	1	1
sú	VKepc+	VB-P---3P-AA---	V--P---3P-AA---	V--P---3P-AA---	V--P---3P-AA---	V--P---3P-AA---	VB-P---3P-AA---	VB-P---3P-AA---	0	1	1	1	1	1	1					1	1							1	1	1	1	1	1							1	1	1	1	1	1	1	1	1	1
pohodlím	SSns7	NNNS7----------	NNNS7----------	NNNS7----------	NNNS7----------	NNNS7----------	NNNS7-----A----	NNNS7-----A----	0	1	1	1	1	1	1	1	1	1	1	1	1	1	1	1	1	1	1	1	1	1	1	1	1	1	1	1	1	1	1
na	Eu6	RR--6----------	RR--6-----------	RR--6-----------	RR--6-----------	RR--6-----------	RR--6----------	RR--6----------	0	1	1	1	1	1	1	1	1	1	1	1	1													1	1	1	1	1	1
európskej	AAfs6x	AAFS6----1-----	AAFS6----1-----	AAFS6----1-----	AAFS6----1-----	AAFS6----1-----	AAFS6----1A----	AAFS6----1A----	0	1	1	1	1	1	1	1	1	1	1	1	1	1	1	1	1	1	1	1	1	1	1	1	1	1	1	1	1	1	1
úrovni	SSfs6	NNFS6----------	NNFS6----------	NNFS6----------	NNFS6----------	NNFS6----------	NNFS6-----A----	NNFS6-----A----	0	1	1	1	1	1	1	1	1	1	1	1	1	1	1	1	1	1	1	1	1	1	1	1	1	1	1	1	1	1	1
Iných	PAmp4	P4MP4----------	P4MP4----------	P4MP4----------	P4MP4----------	P4MP4----------	AAMP4----1A----	AAMP4----1A----	0	1	1	1	1	0	0	1	1	1	1	0	0	1	1	1	1	1	1	1	1	1	1	1	1	1	1	1	1	1	1
stopárov	SSmp4	NNMP4----------	NNMP4----------	NNMP4----------	NNMP4----------	NNMP4----------	NNMP4-----A----	NNMP4-----A----	0	1	1	1	1	1	1	1	1	1	1	1	1	1	1	1	1	1	1	1	1	1	1	1	1	1	1	1	1	1	1
som	VKesa+	VB-S---1P-AA---	V--S---1P-AA---	V--S---1P-AA---	V--S---1P-AA---	V--S---1P-AA---	VB-S---1P-AA---	VB-S---1P-AA---	0	1	1	1	1	1	1					1	1							1	1	1	1	1	1							1	1	1	1	1	1	1	1	1	1
tu	PD	PY-------------	PY-------------	PY-------------	PY-------------	PY-------------	Db-------------	Db-------------	0	1	1	1	1	0	0	1	1	1	1	0	0
zatiaľ	PD	PY-------------	PY-------------	PY-------------	PY-------------	PY-------------	Db-------------	Db-------------	0	1	1	1	1	0	0	1	1	1	1	0	0
ešte	Dx	Db-------1-----	Db-------1-----	TT--------------	TT-------------	Db-------1-----	Db-------------	Db-------------	0	1	0	0	1	1	1	1	0	0	1	1	1
nevidel	VLesam-	V-MS---1R-NA---	V-MS---1R-NA---	V-MS---3R-NA---	V-MS---1R-NA---	V-MS---1R-NA---	VpYS---XR-NA---	VpYS---XR-NA---	0	1	1	1	1	1	1							1	1	1	1	0	0	1	1	1	1	1	1							1	0	1	1	0	0	1	1	1	1
Ako	O	J^-------------	PY-------------	J^-------------	PY-------------	PY-------------	Db-------------	Db-------------	0	0	1	0	0	0	0	0	1	0	0	0	0
dopadol	VLdsci+	V-IS---3R-AN---	V-IS---3R-AN---	V-IS---3R-AN---	V-MS---3R-AN---	V-MS---3R-AN---	VpYS---XR-AA---	VpYS---XR-AA---	0	1	1	1	1	1	1							1	1	0	0	0	0	1	1	1	1	1	1							1	1	1	1	0	0	1	1	1	1
Bohužiaľ	T	TT-------------	TT-------------	TT-------------	Z:------------	TT-------------	TT--------------	TT--------------	0	1	1	0	1	1	1	1	1	0	1	1	1
Strong	%	TT-------------	TT-------------	Z:-------------	Z:------------	TT-------------	NNMS1-----A----	X@-------------	0	1	0	0	1	0	0	1	0	0	1	0	0
wind	%	TT-------------	TT-------------	Z:-------------	Z:------------	TT-------------	ACMP------A----	X@-------------	0	1	0	0	1	0	0	1	0	0	1	0	0
Silný	AAis1x:r	AAIS1----1-----	AAIS1----1-----	AAIS1----1-----	AAIS1----1-----	AAIS1----1-----	AAIS1----1A----	AAIS1----1A----	0	1	1	1	1	1	1	1	1	1	1	1	1	1	1	1	1	1	1	1	1	1	1	1	1	1	1	1	1	1	1
vietor	SSis1	NNIS1----------	NNIS1----------	NNIS1----------	NNIS1----------	NNIS1----------	NNIS1-----A----	NNIS1-----A----	0	1	1	1	1	1	1	1	1	1	1	1	1	1	1	1	1	1	1	1	1	1	1	1	1	1	1	1	1	1	1
ma	PPhs4	PPxS4----------	PPxS4----------	PPxS4----------	PPxS4----------	PPxS4----------	PH-S4--1-------	PH-S4--1-------	0	1	1	1	1	1	1	1	1	1	1	0	0	1	1	1	1			1	1	1	1	1	1	1	1	1	1	1	1
posiela	VKesc+	VB-S---3P-AA---	V--S---3P-AA---	V--S---3P-AA---	V--S---3P-AA---	V--S---3P-AA---	VB-S---3P-AA---	VB-S---3P-AA---	0	1	1	1	1	1	1					1	1							1	1	1	1	1	1							1	1	1	1	1	1	1	1	1	1
späť	Dx	Db-------1-----	Db-------1-----	Db-------1-----	Db-------1-----	Db-------1-----	Db-------------	Db-------------	0	1	1	1	1	1	1	1	1	1	1	1	1
na	Eu4	RR--4----------	RR--4-----------	RR--4-----------	RR--4-----------	RR--4-----------	RR--4----------	RR--4----------	0	1	1	1	1	1	1	1	1	1	1	1	1													1	1	1	1	1	1
vajíčko	SSns4	NNNS4----------	NNNS4----------	NNNS4----------	NNNS4----------	NNNS4----------	NNNS4-----A----	NNNS4-----A----	0	1	1	1	1	1	1	1	1	1	1	1	1	1	1	1	1	1	1	1	1	1	1	1	1	1	1	1	1	1	1
Na	Eu6	RR--6----------	RR--6-----------	RR--6-----------	RR--6-----------	RR--6-----------	RR--6----------	RR--6----------	0	1	1	1	1	1	1	1	1	1	1	1	1													1	1	1	1	1	1
zastávke	SSfs6	NNFS6----------	NNFS6----------	NNFS6----------	NNFS6----------	NNFS6----------	NNFS6-----A----	NNFS6-----A----	0	1	1	1	1	1	1	1	1	1	1	1	1	1	1	1	1	1	1	1	1	1	1	1	1	1	1	1	1	1	1
na	Eu6	RR--6----------	RR--6-----------	RR--6-----------	RR--6-----------	RR--6-----------	RR--6----------	RR--6----------	0	1	1	1	1	1	1	1	1	1	1	1	1													1	1	1	1	1	1
Záhradkách	SSfp6:r	NNFP6----------	NNFP6----------	NNFP6----------	NNFP6----------	NNFP6----------	NNFP6-----A----	NNFP6-----A----	0	1	1	1	1	1	1	1	1	1	1	1	1	1	1	1	1	1	1	1	1	1	1	1	1	1	1	1	1	1	1
nás	PPhp4	PPxP4----------	PPxP4----------	PPxP4----------	PPxP4----------	PPxP4----------	PP-P4--1-------	PP-P4--1-------	0	1	1	1	1	1	1	1	1	1	1	1	1	1	1	1	1			1	1	1	1	1	1	1	1	1	1	1	1
čakal	VLesci+	V-IS---3R-AA---	V-IS---3R-AA---	V-IS---3R-AA---	V-IS---3R-AA---	V-IS---3R-AA---	VpYS---XR-AA---	VpYS---XR-AA---	0	1	1	1	1	1	1							1	1	1	1	0	0	1	1	1	1	1	1							1	1	1	1	0	0	1	1	1	1
veľmi	Dx	Db-------1-----	Db-------1-----	Db-------1-----	Db-------1-----	Db-------1-----	Db-------------	Db-------------	0	1	1	1	1	1	1	1	1	1	1	1	1
zaujímavý	AAis1x	AAIS1----1-----	AAIS1----1-----	AAIS1----1-----	AAIS1----1-----	AAIS1----1-----	AAIS1----1A----	AAIS1----1A----	0	1	1	1	1	1	1	1	1	1	1	1	1	1	1	1	1	1	1	1	1	1	1	1	1	1	1	1	1	1	1
pohľad	SSis1	NNIS1----------	NNIS1----------	NNIS1----------	NNIS1----------	NNIS1----------	NNIS1-----A----	NNIS1-----A----	0	1	1	1	1	1	1	1	1	1	1	1	1	1	1	1	1	1	1	1	1	1	1	1	1	1	1	1	1	1	1
Bežné	AAfp1x	AAFP1----1-----	AAFP1----1-----	AAFP1----1-----	AAFP1----1-----	AAFP1----1-----	AAFP1----1A----	AAFP1----1A----	0	1	1	1	1	1	1	1	1	1	1	1	1	1	1	1	1	1	1	1	1	1	1	1	1	1	1	1	1	1	1
prachovky	SSfp1	NNFP1----------	NNFP1----------	NNFP1----------	NNFP1----------	NNFP1----------	NNFP1-----A----	NNFP1-----A----	0	1	1	1	1	1	1	1	1	1	1	1	1	1	1	1	1	1	1	1	1	1	1	1	1	1	1	1	1	1	1
naňho	PFms4g	PDMS4----------	PDMS4----------	PDMS4----------	PDMS4----------	PDMS4----------	P3--4----------	P3--4----------	0	1	1	1	1	1	1	1	1	1	1	0	0	1	1	1	1			1	1	1	1			1	1	1	1	1	1
nestačia	VKjpc-	VB-P---3P-N----	V--P---3P-N----	V--P---3P-N----	V--P---3P-NA---	V--P---3P-N----	VB-P---3P-NA---	VB-P---3P-NA---	0	1	1	1	1	1	1					1	1							1	1	1	1	1	1							1	1	1	1	1	1	1	1	1	1
Ja	PPhs1	PPxS1----------	PPxS1----------	PPxS1----------	PPxS1----------	PPxS1----------	PP-S1--1-------	PP-S1--1-------	0	1	1	1	1	1	1	1	1	1	1	1	1	1	1	1	1			1	1	1	1	1	1	1	1	1	1	1	1
som	VKesa+	VB-S---1P-AA---	V--S---1P-AA---	V--S---1P-AA---	V--S---1P-AA---	V--S---1P-AA---	VB-S---1P-AA---	VB-S---1P-AA---	0	1	1	1	1	1	1					1	1							1	1	1	1	1	1							1	1	1	1	1	1	1	1	1	1
chcela	VLesaf+	V-FS---1R-AA---	V-FS---1R-AA---	V-FS---1R-AA---	V-FS---1R-AA---	V-FS---1R-AA---	VpFS---XR-AA---	VpFS---XR-AA---	0	1	1	1	1	1	1							1	1	1	1	1	1	1	1	1	1	1	1							1	1	1	1	0	0	1	1	1	1
vyhrávať	VIe+	Vf--------AA---	Vf--------AA---	Vf--------AA---	Vf--------AA---	Vf--------AA---	Vf--------A----	Vf--------A----	0	1	1	1	1	1	1	1	1	1	1	1	1
A	O	J^-------------	J^-------------	J^-------------	J^-------------	J^-------------	J^-------------	J^-------------	0	1	1	1	1	1	1	1	1	1	1	1	1
vyhrávam	VKesa+	VB-S---1P-AA---	V--S---1P-AA---	V--S---1P-AA---	V--S---1P-AA---	V--S---1P-AA---	VB-S---1P-AA---	VB-S---1P-AA---	0	1	1	1	1	1	1					1	1							1	1	1	1	1	1							1	1	1	1	1	1	1	1	1	1
slovenskej	AAfs2x	AAFS2----1-----	AAFS2----1-----	AAFS2----1-----	AAFS2----1-----	AAFS2----1-----	AAFS2----1A----	AAFS2----1A----	0	1	1	1	1	1	1	1	1	1	1	1	1	1	1	1	1	1	1	1	1	1	1	1	1	1	1	1	1	1	1
kultúrnej	AAfs2x	AAFS2----1-----	AAFS2----1-----	AAFS2----1-----	AAFS2----1-----	AAFS2----1-----	AAFS2----1A----	AAFS2----1A----	0	1	1	1	1	1	1	1	1	1	1	1	1	1	1	1	1	1	1	1	1	1	1	1	1	1	1	1	1	1	1
histórie	SSfs2	NNFS2----------	NNFS2----------	NNFS2----------	NNFS2----------	NNFS2----------	NNFS2-----A----	NNFS2-----A----	0	1	1	1	1	1	1	1	1	1	1	1	1	1	1	1	1	1	1	1	1	1	1	1	1	1	1	1	1	1	1
Od	Eu2	RR--2----------	RR--2-----------	RR--2-----------	RR--2-----------	RR--2-----------	RR--2----------	RR--2----------	0	1	1	1	1	1	1	1	1	1	1	1	1													1	1	1	1	1	1
tej	PFfs2	PDFS2----------	PDFS2----------	PDFS2----------	PDFS2----------	PDFS2----------	PDFS2----------	PDFS2----------	0	1	1	1	1	1	1	1	1	1	1	1	1	1	1	1	1	1	1	1	1	1	1	1	1	1	1	1	1	1	1
chvíle	SSfs2	NNFS2----------	NNFS2----------	NNFS2----------	NNFS2----------	NNFS2----------	NNFS2-----A----	NNFS2-----A----	0	1	1	1	1	1	1	1	1	1	1	1	1	1	1	1	1	1	1	1	1	1	1	1	1	1	1	1	1	1	1
vstupuje	VKesc+	VB-S---3P-AA---	V--S---3P-AA---	V--S---3P-AA---	V--S---3P-AA---	V--S---3P-AA---	VB-S---3P-AA---	VB-S---3P-AA---	0	1	1	1	1	1	1					1	1							1	1	1	1	1	1							1	1	1	1	1	1	1	1	1	1
do	Eu2	RR--2----------	RR--2-----------	RR--2-----------	RR--2-----------	RR--2-----------	RR--2----------	RR--2----------	0	1	1	1	1	1	1	1	1	1	1	1	1													1	1	1	1	1	1
hry	SSfs2	NNFS2----------	NNFS2----------	NNFS2----------	NNFS2----------	NNFS2----------	NNFS2-----A----	NNFS2-----A----	0	1	1	1	1	1	1	1	1	1	1	1	1	1	1	1	1	1	1	1	1	1	1	1	1	1	1	1	1	1	1
slovenská	AAfs1x	AAFS1----1-----	AAFS1----1-----	AAFS1----1-----	AAFS1----1-----	AAFS1----1-----	AAFS1----1A----	AAFS1----1A----	0	1	1	1	1	1	1	1	1	1	1	1	1	1	1	1	1	1	1	1	1	1	1	1	1	1	1	1	1	1	1
časť	SSfs1	NNFS1----------	NNFS1----------	NNFS1----------	NNFS1----------	NNFS1----------	NNFS1-----A----	NNFS1-----A----	0	1	1	1	1	1	1	1	1	1	1	1	1	1	1	1	1	1	1	1	1	1	1	1	1	1	1	1	1	1	1
Uhorska	SSns2:r	NNNS2----------	NNNS2----------	NNNS2----------	NNNS2----------	NNNS2----------	NNNS2-----A----	NNNS2-----A----	0	1	1	1	1	1	1	1	1	1	1	1	1	1	1	1	1	1	1	1	1	1	1	1	1	1	1	1	1	1	1
Do	Eu2	RR--2----------	RR--2-----------	RR--2-----------	RR--2-----------	RR--2-----------	RR--2----------	RR--2----------	0	1	1	1	1	1	1	1	1	1	1	1	1													1	1	1	1	1	1
slovenských	AAfp2x	AAFP2----1-----	AAFP2----1-----	AAFP2----1-----	AAFP2----1-----	AAFP2----1-----	AAFP2----1A----	AAFP2----1A----	0	1	1	1	1	1	1	1	1	1	1	1	1	1	1	1	1	1	1	1	1	1	1	1	1	1	1	1	1	1	1
častí	SSfp2	NNFP2----------	NNFP2----------	NNFP2----------	NNFP2----------	NNFP2----------	NNFP2-----A----	NNFP2-----A----	0	1	1	1	1	1	1	1	1	1	1	1	1	1	1	1	1	1	1	1	1	1	1	1	1	1	1	1	1	1	1
Uhorska	SSns2:r	NNNS2----------	NNNS2----------	NNNS2----------	NNNS2----------	NNNS2----------	NNNS2-----A----	NNNS2-----A----	0	1	1	1	1	1	1	1	1	1	1	1	1	1	1	1	1	1	1	1	1	1	1	1	1	1	1	1	1	1	1
sa	R	NNNS2----------	NNNS2----------	NNNS2----------	NNNS2----------	NNNS2----------	P7-X4----------	P7-X4----------	0	1	1	1	1	0	0	1	1	1	1	0	0	1	1	1	1			1	1	1	1	0	0	1	1	1	1	0	0
vtedy	PD	PY-------------	PY-------------	PY-------------	PY-------------	PY-------------	Db-------------	Db-------------	0	1	1	1	1	0	0	1	1	1	1	0	0
utiahla	VLdscf+	V-FS---3R-AN---	V-FS---3R-AN---	V-FS---3R-AN---	V-FS---3R-AN---	V-FS---3R-AN---	VpFS---XR-AA---	VpFS---XR-AA---	0	1	1	1	1	1	1							1	1	1	1	1	1	1	1	1	1	1	1							1	1	1	1	0	0	1	1	1	1
jedna	NFfs1	CxFS1----------	CxFS1----------	CxFS1----------	CxFS1----------	CxFS1----------	ClFS1----------	ClFS1----------	0	1	1	1	1	1	1	1	1	1	1	0	0	1	1	1	1	1	1	1	1	1	1	1	1	1	1	1	1	1	1
časť	SSfs1	NNFS1----------	NNFS1----------	NNFS1----------	NNFS1----------	NNFS1----------	NNFS1-----A----	NNFS1-----A----	0	1	1	1	1	1	1	1	1	1	1	1	1	1	1	1	1	1	1	1	1	1	1	1	1	1	1	1	1	1	1
českých	AAmp2x	AAMP2----1-----	AAMP2----1-----	AAMP2----1-----	AAMP2----1-----	AAMP2----1-----	AAMP2----1A----	AAMP2----1A----	0	1	1	1	1	1	1	1	1	1	1	1	1	1	1	1	1	1	1	1	1	1	1	1	1	1	1	1	1	1	1
emigrovaných	Gtmp2x	AAMP2----1-----	AAMP2----1-----	AAMP2----1-----	AAMP2----1-----	AAMP2----1-----	AAMP2----1A----	AAMP2----1A----	0	1	1	1	1	1	1	1	1	1	1	1	1	1	1	1	1	1	1	1	1	1	1	1	1	1	1	1	1	1	1
protestantov	SSmp2	NNMP2----------	NNMP2----------	NNMP2----------	NNMP2----------	NNMP2----------	NNMP2-----A----	NNMP2-----A----	0	1	1	1	1	1	1	1	1	1	1	1	1	1	1	1	1	1	1	1	1	1	1	1	1	1	1	1	1	1	1
a	O	J^-------------	J^-------------	J^-------------	J^-------------	J^-------------	J^-------------	J^-------------	0	1	1	1	1	1	1	1	1	1	1	1	1
tu	PD	PY-------------	PY-------------	PY-------------	PY-------------	PY-------------	Db-------------	Db-------------	0	1	1	1	1	0	0	1	1	1	1	0	0
našli	VLdpcm+	V-MP---3R-AN---	V-MP---3R-AN---	V-MP---3R-AN---	V-MP---3R-AN---	V-MP---3R-AN---	VpXP---XR-AA---	VpXP---XR-AA---	0	1	1	1	1	1	1							1	1	1	1	0	0	1	1	1	1	1	1							1	1	1	1	0	0	1	1	1	1
v	Eu6	RR--6----------	RR--6-----------	RR--6-----------	RR--6-----------	RR--6-----------	RR--6----------	RR--6----------	0	1	1	1	1	1	1	1	1	1	1	1	1													1	1	1	1	1	1
používaní	SSns6	NNNS6----------	NNNS6----------	NNNS6----------	NNNS6----------	NNNS6----------	NNNS6-----A----	NNNS6-----A----	0	1	1	1	1	1	1	1	1	1	1	1	1	1	1	1	1	1	1	1	1	1	1	1	1	1	1	1	1	1	1
svoj	PFis4	PDIS4----------	PDIS4----------	PDIS4----------	PDIS4----------	PDIS4----------	P8IS4----------	P8IS4----------	0	1	1	1	1	1	1	1	1	1	1	0	0	1	1	1	1	1	1	1	1	1	1	1	1	1	1	1	1	1	1
vlastný	AAis4x	AAIS4----1-----	AAIS4----1-----	AAIS4----1-----	AAIS4----1-----	AAIS4----1-----	AAIS4----1A----	AAIS4----1A----	0	1	1	1	1	1	1	1	1	1	1	1	1	1	1	1	1	1	1	1	1	1	1	1	1	1	1	1	1	1	1
spisovný	AAis4x	AAIS4----1-----	AAIS4----1-----	AAIS4----1-----	AAIS4----1-----	AAIS4----1-----	AAIS4----1A----	AAIS4----1A----	0	1	1	1	1	1	1	1	1	1	1	1	1	1	1	1	1	1	1	1	1	1	1	1	1	1	1	1	1	1	1
jazyk	SSis4	NNIS4----------	NNIS4----------	NNIS4----------	NNIS4----------	NNIS4----------	NNIS4-----A----	NNIS4-----A----	0	1	1	1	1	1	1	1	1	1	1	1	1	1	1	1	1	1	1	1	1	1	1	1	1	1	1	1	1	1	1
presne	T	TT-------------	Db-------1-----	Db-------1-----	TT-------------	TT-------------	Dg-------1A----	Dg-------1A----	0	0	0	1	1	0	0	0	0	1	1	0	0
tak	PD	PY-------------	PY-------------	PY-------------	PY-------------	PY-------------	Db-------------	Db-------------	0	1	1	1	1	0	0	1	1	1	1	0	0
ako	PD	PY-------------	PY-------------	J^-------------	J^-------------	J^-------------	Db-------------	Db-------------	0	1	0	0	0	0	0	1	0	0	0	0	0
vo	Ev6	RV--6----------	RV--6-----------	RV--6-----------	RV--6-----------	RV--6-----------	RV--6----------	RV--6----------	0	1	1	1	1	1	1	1	1	1	1	1	1													1	1	1	1	1	1
svojej	PFfs6	PDFS6----------	PDFS6----------	PDFS6----------	PDFS6----------	PDFS6----------	P8FS6----------	P8FS6----------	0	1	1	1	1	1	1	1	1	1	1	0	0	1	1	1	1	1	1	1	1	1	1	1	1	1	1	1	1	1	1
českej	AAfs6x	AAFS6----1-----	AAFS6----1-----	AAFS6----1-----	AAFS6----1-----	AAFS6----1-----	AAFS6----1A----	AAFS6----1A----	0	1	1	1	1	1	1	1	1	1	1	1	1	1	1	1	1	1	1	1	1	1	1	1	1	1	1	1	1	1	1
vlasti	SSfs6	NNFS6----------	NNFS6----------	NNFS6----------	NNFS6----------	NNFS6----------	NNFS6-----A----	NNFS6-----A----	0	1	1	1	1	1	1	1	1	1	1	1	1	1	1	1	1	1	1	1	1	1	1	1	1	1	1	1	1	1	1
Podľa	Eu2	RR--2----------	RR--2-----------	RR--2-----------	RR--2-----------	RR--2-----------	RR--2----------	RR--2----------	0	1	1	1	1	1	1	1	1	1	1	1	1													1	1	1	1	1	1
princípu	SSis2	NNIS2----------	NNIS2----------	NNIS2----------	NNIS2----------	NNIS2----------	NNIS2-----A----	NNIS2-----A----	0	1	1	1	1	1	1	1	1	1	1	1	1	1	1	1	1	1	1	1	1	1	1	1	1	1	1	1	1	1	1
siedmich	NUnp2	CxNP2----------	CxNP2----------	CxNP2----------	CxNP2----------	CxNP2----------	Cn-S2----------	Cn-S2----------	0	1	1	1	1	1	1	1	1	1	1	0	0	1	1	1	1			1	1	1	1	0	0	1	1	1	1	1	1
slobodných	AAnp2x	AANP2----1-----	AANP2----1-----	AANP2----1-----	AANP2----1-----	AANP2----1-----	AANP2----1A----	AANP2----1A----	0	1	1	1	1	1	1	1	1	1	1	1	1	1	1	1	1	1	1	1	1	1	1	1	1	1	1	1	1	1	1
umení	SSnp2	NNNP2----------	NNNP2----------	NNNP2----------	NNNP2----------	NNNP2----------	NNNP2-----A----	NNNP2-----A----	0	1	1	1	1	1	1	1	1	1	1	1	1	1	1	1	1	1	1	1	1	1	1	1	1	1	1	1	1	1	1
prvým	NAis7	CxIS7----------	CxIS7----------	CxIS7----------	CxIS7----------	CxIS7----------	CrIS7----------	CrIS7----------	0	1	1	1	1	1	1	1	1	1	1	0	0	1	1	1	1	1	1	1	1	1	1	1	1	1	1	1	1	1	1
stupňom	SSis7	NNIS7----------	NNIS7----------	NNIS7----------	NNIS7----------	NNIS7----------	NNIS7-----A----	NNIS7-----A----	0	1	1	1	1	1	1	1	1	1	1	1	1	1	1	1	1	1	1	1	1	1	1	1	1	1	1	1	1	1	1
trivia	SSns2	NNNS2----------	NNNS2----------	NNNS2----------	NNNS2----------	NNNS2----------	NNFS2-----A----	X@-------------	0	1	1	1	1	1	0	1	1	1	1	1	0	1	1	1	1	0		1	1	1	1	1		1	1	1	1	1
je	VKesc+	VB-S---3P-AA---	V--S---3P-AA---	V--S---3P-AA---	V--S---3P-AA---	V--S---3P-AA---	VB-S---3P-AA---	VB-S---3P-AA---	0	1	1	1	1	1	1					1	1							1	1	1	1	1	1							1	1	1	1	1	1	1	1	1	1
gramatika	SSfs1	NNFS1----------	NNFS1----------	NNFS1----------	NNFS1----------	NNFS1----------	NNFS1-----A----	NNFS1-----A----	0	1	1	1	1	1	1	1	1	1	1	1	1	1	1	1	1	1	1	1	1	1	1	1	1	1	1	1	1	1	1
Európska	AAfs1x	AAFS1----1-----	AAFS1----1-----	AAFS1----1-----	AAFS1----1-----	AAFS1----1-----	AAFS1----1A----	AAFS1----1A----	0	1	1	1	1	1	1	1	1	1	1	1	1	1	1	1	1	1	1	1	1	1	1	1	1	1	1	1	1	1	1
únia	SSfs1	NNFS1----------	NNFS1----------	NNFS1----------	NNFS1----------	NNFS1----------	NNFS1-----A----	NNFS1-----A----	0	1	1	1	1	1	1	1	1	1	1	1	1	1	1	1	1	1	1	1	1	1	1	1	1	1	1	1	1	1	1
čiže	O	J^-------------	J^-------------	J^-------------	J^-------------	J^-------------	J^-------------	J^-------------	0	1	1	1	1	1	1	1	1	1	1	1	1
rozmieňanie	SSns1	NNNS1----------	NNNS1----------	NNNS1----------	NNNS1----------	NNNS1----------	NNNS4-----A----	NNNS4-----A----	0	1	1	1	1	1	1	1	1	1	1	1	1	1	1	1	1	1	1	1	1	1	1	1	1	1	1	1	1	0	0
veľkých	AAfp2x	AAFP2----1-----	AAFP2----1-----	AAFP2----1-----	AAFP2----1-----	AAFP2----1-----	AAFP2----1A----	AAFP2----1A----	0	1	1	1	1	1	1	1	1	1	1	1	1	1	1	1	1	1	1	1	1	1	1	1	1	1	1	1	1	1	1
bankoviek	SSfp2	NNFP2----------	NNFP2----------	NNFP2----------	NNFP2----------	NNFP2----------	NNFP2-----A----	NNFP2-----A----	0	1	1	1	1	1	1	1	1	1	1	1	1	1	1	1	1	1	1	1	1	1	1	1	1	1	1	1	1	1	1
na	Eu4	RR--4----------	RR--4-----------	RR--4-----------	RR--4-----------	RR--4-----------	RR--4----------	RR--4----------	0	1	1	1	1	1	1	1	1	1	1	1	1													1	1	1	1	1	1
drobné	AAfp4x	AAFP4----1-----	AAFP4----1-----	AAFP4----1-----	AAFP4----1-----	AAFP4----1-----	AAFP4----1A----	AAFP4----1A----	0	1	1	1	1	1	1	1	1	1	1	1	1	1	1	1	1	1	1	1	1	1	1	1	1	1	1	1	1	1	1
mince	SSfp4	NNFP4----------	NNFP4----------	NNFP4----------	NNFP4----------	NNFP4----------	NNFP4-----A----	NNFP4-----A----	0	1	1	1	1	1	1	1	1	1	1	1	1	1	1	1	1	1	1	1	1	1	1	1	1	1	1	1	1	1	1
Toto	PFns1	PDNS1----------	PDNS1----------	PDNS1----------	PDNS1----------	PDNS1----------	PDNS1----------	PDNS1----------	0	1	1	1	1	1	1	1	1	1	1	1	1	1	1	1	1	1	1	1	1	1	1	1	1	1	1	1	1	1	1
stieranie	SSns1	NNNS1----------	NNNS1----------	NNNS1----------	NNNS1----------	NNNS1----------	NNNS1-----A----	NNNS1-----A----	0	1	1	1	1	1	1	1	1	1	1	1	1	1	1	1	1	1	1	1	1	1	1	1	1	1	1	1	1	1	1
hraníc	SSfp2	NNFP2----------	NNFP2----------	NNFP2----------	NNFP2----------	NNFP2----------	NNFP2-----A----	NNFP2-----A----	0	1	1	1	1	1	1	1	1	1	1	1	1	1	1	1	1	1	1	1	1	1	1	1	1	1	1	1	1	1	1
je	VKesc+	VB-S---3P-AA---	V--S---3P-AA---	V--S---3P-AA---	V--S---3P-AA---	V--S---3P-AA---	VB-S---3P-AA---	VB-S---3P-AA---	0	1	1	1	1	1	1					1	1							1	1	1	1	1	1							1	1	1	1	1	1	1	1	1	1
veľmi	Dx	Db-------1-----	Db-------1-----	Db-------1-----	Db-------1-----	Db-------1-----	Db-------------	Db-------------	0	1	1	1	1	1	1	1	1	1	1	1	1
príjemné	AAns1x	AANS1----1-----	AANS1----1-----	AANS1----1-----	AANS1----1-----	AANS1----1-----	AANS1----1A----	AANS1----1A----	0	1	1	1	1	1	1	1	1	1	1	1	1	1	1	1	1	1	1	1	1	1	1	1	1	1	1	1	1	1	1
pokiaľ	O	J^-------------	J^-------------	J^-------------	J^-------------	J^-------------	J,-------------	J,-------------	0	1	1	1	1	1	1	1	1	1	1	0	0
ide	VKesc+	VB-S---3P-AA---	V--S---3P-AA---	V--S---3P-AA---	V--S---3P-AA---	V--S---3P-AA---	VB-S---3P-AA---	VB-S---3P-AA---	0	1	1	1	1	1	1					1	1							1	1	1	1	1	1							1	1	1	1	1	1	1	1	1	1
o	Eu4	RR--4----------	RR--4-----------	RR--4-----------	RR--4-----------	RR--4-----------	RR--4----------	RR--4----------	0	1	1	1	1	1	1	1	1	1	1	1	1													1	1	1	1	1	1
poriadneho	AAms4x	AAMS4----1-----	AAMS4----1-----	AAMS4----1-----	AAMS4----1-----	AAMS4----1-----	AAMS4----1A----	AAMS4----1A----	0	1	1	1	1	1	1	1	1	1	1	1	1	1	1	1	1	1	1	1	1	1	1	1	1	1	1	1	1	1	1
občana	SSms4	NNMS4----------	NNMS4----------	NNMS4----------	NNMS4----------	NNMS4----------	NNMS4-----A----	NNMS4-----A----	0	1	1	1	1	1	1	1	1	1	1	1	1	1	1	1	1	1	1	1	1	1	1	1	1	1	1	1	1	1	1
ktorý	PAms1	P4MS1----------	P4MS1----------	P4MS1----------	P4MS1----------	P4MS1----------	P4MS1----------	P4MS1----------	0	1	1	1	1	1	1	1	1	1	1	1	1	1	1	1	1	1	1	1	1	1	1	1	1	1	1	1	1	1	1
cestuje	VKesc+	VB-S---3P-AA---	V--S---3P-AA---	V--S---3P-AA---	V--S---3P-AA---	V--S---3P-AA---	VB-S---3P-AA---	VB-S---3P-AA---	0	1	1	1	1	1	1					1	1							1	1	1	1	1	1							1	1	1	1	1	1	1	1	1	1
za	Eu7	RR--7----------	RR--7-----------	RR--7-----------	RR--7-----------	RR--7-----------	RR--7----------	RR--7----------	0	1	1	1	1	1	1	1	1	1	1	1	1													1	1	1	1	1	1
svojím	PFis7	PDIS7----------	PDIS7----------	PDIS7----------	PDIS7----------	PDIS7----------	P8IS7----------	P8IS7----------	0	1	1	1	1	1	1	1	1	1	1	0	0	1	1	1	1	1	1	1	1	1	1	1	1	1	1	1	1	1	1
obchodom	SSis7	NNIS7----------	NNIS7----------	NNIS7----------	NNIS7----------	NNIS7----------	NNIS7-----A----	NNIS7-----A----	0	1	1	1	1	1	1	1	1	1	1	1	1	1	1	1	1	1	1	1	1	1	1	1	1	1	1	1	1	1	1
alebo	O	J^-------------	J^-------------	J^-------------	J^-------------	J^-------------	J^-------------	J^-------------	0	1	1	1	1	1	1	1	1	1	1	1	1
za	Eu7	RR--7----------	RR--7-----------	RR--7-----------	RR--7-----------	RR--7-----------	RR--7----------	RR--7----------	0	1	1	1	1	1	1	1	1	1	1	1	1													1	1	1	1	1	1
svojou	PFfs7	PDFS7----------	PDFS7----------	PDFS7----------	PDFS7----------	PDFS7----------	P8FS7----------	P8FS7----------	0	1	1	1	1	1	1	1	1	1	1	0	0	1	1	1	1	1	1	1	1	1	1	1	1	1	1	1	1	1	1
dovolenkou	SSfs7	NNFS7----------	NNFS7----------	NNFS7----------	NNFS7----------	NNFS7----------	NNFS7-----A----	NNFS7-----A----	0	1	1	1	1	1	1	1	1	1	1	1	1	1	1	1	1	1	1	1	1	1	1	1	1	1	1	1	1	1	1
Ľubomír	SSms1:r	NNMS1----------	NNMS1----------	NNMS1----------	NNMS1----------	NNMS1----------	NNMS1-----A----	NNMS1-----A----	0	1	1	1	1	1	1	1	1	1	1	1	1	1	1	1	1	1	1	1	1	1	1	1	1	1	1	1	1	1	1
Ďurovič	SSms1:r	NNMS1----------	NNMS1----------	NNMS1----------	NNMS1----------	NNMS1----------	NNMS1-----A----	X@-------------	0	1	1	1	1	1	0	1	1	1	1	1	0	1	1	1	1	1		1	1	1	1	1		1	1	1	1	1
Pojem	SSis1	NNIS1----------	NNMS1----------	NNIS1----------	NNIS1----------	NNIS1----------	NNIS1-----A----	NNIS1-----A----	0	1	1	1	1	1	1	1	1	1	1	1	1	0	1	1	1	1	1	1	1	1	1	1	1	1	1	1	1	1	1
slavico	%	NNIS1----------	NNMS1----------	NNIS1----------	NNIS1----------	NNIS1----------	NNNS1-----A----	X@-------------	0	1	1	1	1	1	0	1	1	1	1	1	0	0	1	1	1	0		1	1	1	1	1		1	1	1	1	1
bohemicus	%	NNIS1----------	NNMS1----------	NNIS1----------	Z:------------	NNIS1----------	NNIS1-----A----	X@-------------	0	1	1	0	1	1	0	1	1	0	1	1	0	0	1		1	1		1	1		1	1		1	1		1	1
zo	Ev2	RV--2----------	RV--2-----------	RV--2-----------	RV--2-----------	RV--2-----------	RV--2----------	RV--2----------	0	1	1	1	1	1	1	1	1	1	1	1	1													1	1	1	1	1	1
začiatku	SSis2	NNIS2----------	NNIS2----------	NNIS2----------	NNIS2----------	NNIS2----------	NNIS2-----A----	NNIS2-----A----	0	1	1	1	1	1	1	1	1	1	1	1	1	1	1	1	1	1	1	1	1	1	1	1	1	1	1	1	1	1	1
storočia	SSns2	NNNS2----------	NNNS2----------	NNNS2----------	NNNS2----------	NNNS2----------	NNNS2-----A----	NNNS2-----A----	0	1	1	1	1	1	1	1	1	1	1	1	1	1	1	1	1	1	1	1	1	1	1	1	1	1	1	1	1	1	1
je	VKesc+	VB-S---3P-AA---	V--S---3P-AA---	V--S---3P-AA---	V--S---3P-AA---	V--S---3P-AA---	VB-S---3P-AA---	VB-S---3P-AA---	0	1	1	1	1	1	1					1	1							1	1	1	1	1	1							1	1	1	1	1	1	1	1	1	1
začiatok	SSis1	NNIS1----------	NNIS1----------	NNIS1----------	NNIS1----------	NNIS1----------	NNIS1-----A----	NNIS1-----A----	0	1	1	1	1	1	1	1	1	1	1	1	1	1	1	1	1	1	1	1	1	1	1	1	1	1	1	1	1	1	1
pojmu	SSis2	NNIS2----------	NNIS2----------	NNIS2----------	NNIS2----------	NNIS2----------	NNIS2-----A----	NNIS2-----A----	0	1	1	1	1	1	1	1	1	1	1	1	1	1	1	1	1	1	1	1	1	1	1	1	1	1	1	1	1	1	1
česko	Q	NNIS2----------	NNIS2----------	NNIS2----------	NNIS2----------	NNIS2----------	A2-------------	A2-------------	0	1	1	1	1	0	0	1	1	1	1	0	0	1	1	1	1			1	1	1	1			1	1	1	1
slovenský	AAis1x	AAIS1----1-----	AAIS1----1-----	AAMS1----1-----	AAIS1----1-----	AAIS1----1-----	AAMS1----1A----	AAMS1----1A----	0	1	1	1	1	1	1	1	1	1	1	1	1	1	0	1	1	0	0	1	1	1	1	1	1	1	1	1	1	1	1
Krman	SSms1:r	NNMS1----------	NNMS1----------	NNMS1----------	NNMS1----------	NNMS1----------	NNMS1-----A----	X@-------------	0	1	1	1	1	1	0	1	1	1	1	1	0	1	1	1	1	1		1	1	1	1	1		1	1	1	1	1
si	R	NNMS1----------	NNMS1----------	NNMS1----------	NNMS1----------	NNMS1----------	P7-X3----------	P7-X3----------	0	1	1	1	1	0	0	1	1	1	1	0	0	1	1	1	1			1	1	1	1	0	0	1	1	1	1	0	0
bol	VLescm+	V-MS---3R-AA---	V-MS---3R-AA---	V-MS---3R-AA---	V-MS---3R-AA---	V-MS---3R-AA---	VpYS---XR-AA---	VpYS---XR-AA---	0	1	1	1	1	1	1							1	1	1	1	0	0	1	1	1	1	1	1							1	1	1	1	0	0	1	1	1	1
vedomý	AAms1x	AAMS1----1-----	AAMS1----1-----	AAMS1----1-----	AAMS1----1-----	AAMS1----1-----	AAMS1----1A----	AAMS1----1A----	0	1	1	1	1	1	1	1	1	1	1	1	1	1	1	1	1	1	1	1	1	1	1	1	1	1	1	1	1	1	1
že	O	J^-------------	J^-------------	J^-------------	J^-------------	J^-------------	J,-------------	J,-------------	0	1	1	1	1	1	1	1	1	1	1	0	0
meno	SSns4	NNNS4----------	NNNS4----------	NNNS4----------	NNNS4----------	NNNS4----------	NNNS1-----A----	NNNS1-----A----	0	1	1	1	1	1	1	1	1	1	1	1	1	1	1	1	1	1	1	1	1	1	1	1	1	1	1	1	1	0	0
Slovákov	SSmp2:r	NNMP2----------	NNMP2----------	NNMP2----------	NNMP2----------	NNMP2----------	NNMP2-----A----	NNMP2-----A----	0	1	1	1	1	1	1	1	1	1	1	1	1	1	1	1	1	1	1	1	1	1	1	1	1	1	1	1	1	1	1
treba	Dx	Db-------1-----	Db-------1-----	Db-------1-----	Db-------1-----	Db-------1-----	Dg-------1A----	Dg-------1A----	0	1	1	1	1	1	1	1	1	1	1	0	0
aj	T	TT-------------	TT-------------	TT-------------	TT-------------	TT-------------	J^-------------	J^-------------	0	1	1	1	1	0	0	1	1	1	1	0	0
v	Eu6	RR--6----------	RR--6-----------	RR--6-----------	RR--6-----------	RR--6-----------	RR--6----------	RR--6----------	0	1	1	1	1	1	1	1	1	1	1	1	1													1	1	1	1	1	1
latinčine	SSfs6	NNFS6----------	NNFS6----------	NNFS6----------	NNFS6----------	NNFS6----------	NNFS6-----A----	NNFS6-----A----	0	1	1	1	1	1	1	1	1	1	1	1	1	1	1	1	1	1	1	1	1	1	1	1	1	1	1	1	1	1	1
odlišovať	VIe+	Vf--------AA---	Vf--------AA---	Vf--------AA---	Vf--------AA---	Vf--------AA---	Vf--------A----	Vf--------A----	0	1	1	1	1	1	1	1	1	1	1	1	1
od	Eu2	RR--2----------	RR--2-----------	RR--2-----------	RR--2-----------	RR--2-----------	RR--2----------	RR--2----------	0	1	1	1	1	1	1	1	1	1	1	1	1													1	1	1	1	1	1
všeobecného	AAis2x	AAIS2----1-----	AAIS2----1-----	AAIS2----1-----	AAIS2----1-----	AAIS2----1-----	AAIS2----1A----	AAIS2----1A----	0	1	1	1	1	1	1	1	1	1	1	1	1	1	1	1	1	1	1	1	1	1	1	1	1	1	1	1	1	1	1
názvu	SSis2	NNIS2----------	NNIS2----------	NNIS2----------	NNIS2----------	NNIS2----------	NNIS2-----A----	NNIS2-----A----	0	1	1	1	1	1	1	1	1	1	1	1	1	1	1	1	1	1	1	1	1	1	1	1	1	1	1	1	1	1	1
slavi	%	NNIS2----------	NNIS2----------	NNIS2----------	NNMS2----------	NNIS2----------	VpYS---XR-AA---	X@-------------	0	1	1	1	1	0	0	1	1	1	1	0	0	1	1	0	1	0		1	1	1	1	1		1	1	1	1
a	O	J^-------------	J^-------------	J^-------------	J^-------------	J^-------------	J^-------------	J^-------------	0	1	1	1	1	1	1	1	1	1	1	1	1
vytvoril	VLdscm+	V-MS---3R-AN---	V-MS---3R-AN---	V-MS---3R-AN---	V-MS---3R-AN---	V-MS---3R-AN---	VpYS---XR-AA---	VpYS---XR-AA---	0	1	1	1	1	1	1							1	1	1	1	0	0	1	1	1	1	1	1							1	1	1	1	0	0	1	1	1	1
nové	AAns4x	AANS4----1-----	AANS4----1-----	AANS4----1-----	AANS4----1-----	AANS4----1-----	AANS4----1A----	AANS4----1A----	0	1	1	1	1	1	1	1	1	1	1	1	1	1	1	1	1	1	1	1	1	1	1	1	1	1	1	1	1	1	1
slovo	SSns4	NNNS4----------	NNNS4----------	NNNS4----------	NNNS4----------	NNNS4----------	NNNS4-----A----	NNNS4-----A----	0	1	1	1	1	1	1	1	1	1	1	1	1	1	1	1	1	1	1	1	1	1	1	1	1	1	1	1	1	1	1
slovacii	%	NNNS4----------	NNNS4----------	NNNS4----------	NNNS4----------	NNNS4----------	VpYS---XR-AA---	X@-------------	0	1	1	1	1	0	0	1	1	1	1	0	0	1	1	1	1	0		1	1	1	1	1		1	1	1	1
Druhá	NAfs1	CxFS1----------	CxFS1----------	CxFS1----------	CxFS1----------	CxFS1----------	AAFS1----1A----	CrFS1----------	0	1	1	1	1	0	1	1	1	1	1	0	0	1	1	1	1	1	1	1	1	1	1	1	1	1	1	1	1	1	1
Doležalova	AFfs1x:r	AUFS1----1-----	AUFS1----1-----	AUFS1----1-----	AUFS1----1-----	AUFS1----1-----	NNFS1-----A----	X@-------------	0	1	1	1	1	0	0	1	1	1	1	0	0	1	1	1	1	1		1	1	1	1	1		1	1	1	1	1
inovácia	SSfs1	NNFS1----------	NNFS1----------	NNFS1----------	NNFS1----------	NNFS1----------	NNFS1-----A----	NNFS1-----A----	0	1	1	1	1	1	1	1	1	1	1	1	1	1	1	1	1	1	1	1	1	1	1	1	1	1	1	1	1	1	1
je	VKesc+	VB-S---3P-AA---	V--S---3P-AA---	V--S---3P-AA---	V--S---3P-AA---	V--S---3P-AA---	VB-S---3P-AA---	VB-S---3P-AA---	0	1	1	1	1	1	1					1	1							1	1	1	1	1	1							1	1	1	1	1	1	1	1	1	1
v	Eu6	RR--6----------	RR--6-----------	RR--6-----------	RR--6-----------	RR--6-----------	RR--6----------	RR--6----------	0	1	1	1	1	1	1	1	1	1	1	1	1													1	1	1	1	1	1
gramatickom	AAis6x	AAIS6----1-----	AAIS6----1-----	AAIS6----1-----	AAIS6----1-----	AAIS6----1-----	AAIS6----1A----	AAIS6----1A----	0	1	1	1	1	1	1	1	1	1	1	1	1	1	1	1	1	1	1	1	1	1	1	1	1	1	1	1	1	1	1
popise	SSis6	NNIS6----------	NNIS6----------	NNIS6----------	NNIS6----------	NNIS6----------	NNIS6-----A----	NNIS6-----A----	0	1	1	1	1	1	1	1	1	1	1	1	1	1	1	1	1	1	1	1	1	1	1	1	1	1	1	1	1	1	1
tohto	PFis2	PDIS2----------	PDIS2----------	PDIS2----------	PDIS2----------	PDIS2----------	PDIS2----------	PDIS2----------	0	1	1	1	1	1	1	1	1	1	1	1	1	1	1	1	1	1	1	1	1	1	1	1	1	1	1	1	1	1	1
jazyka	SSis2	NNIS2----------	NNIS2----------	NNIS2----------	NNIS2----------	NNIS2----------	NNIS2-----A----	NNIS2-----A----	0	1	1	1	1	1	1	1	1	1	1	1	1	1	1	1	1	1	1	1	1	1	1	1	1	1	1	1	1	1	1
Obsiahly	AAis4x	AAIS4----1-----	AAIS1----1-----	AAIS4----1-----	AAIS4----1-----	AAIS4----1-----	AAIS1----1A----	AAIS1----1A----	0	1	1	1	1	1	1	1	1	1	1	1	1	1	1	1	1	1	1	1	1	1	1	1	1	0	1	1	1	0	0
vlastivedný	AAis4x	AAIS4----1-----	AAIS1----1-----	AAIS4----1-----	AAIS4----1-----	AAIS4----1-----	AAIS1----1A----	AAIS1----1A----	0	1	1	1	1	1	1	1	1	1	1	1	1	1	1	1	1	1	1	1	1	1	1	1	1	0	1	1	1	0	0
úvod	SSis4	NNIS4----------	NNIS1----------	NNIS4----------	NNIS4----------	NNIS4----------	NNIS1-----A----	NNIS1-----A----	0	1	1	1	1	1	1	1	1	1	1	1	1	1	1	1	1	1	1	1	1	1	1	1	1	0	1	1	1	0	0
Praefatio	%	NNIS4----------	NNIS1----------	NNIS4----------	Z:------------	NNIS4----------	NNNS1-----A----	X@-------------	0	1	1	0	1	1	0	1	1	0	1	1	0	1	1		1	0		1	1		1	1		0	1		1	0
k	Eu3	RR--3----------	RR--3-----------	RR--3-----------	RR--3-----------	RR--3-----------	RR--3----------	RR--3----------	0	1	1	1	1	1	1	1	1	1	1	1	1													1	1	1	1	1	1
Doležalovej	AFfs3x:r	AUFS3----1-----	AUFS3----1-----	AUFS3----1-----	AUFS3----1-----	AUFS3----1-----	AAFS3----1A----	X@-------------	0	1	1	1	1	1	0	1	1	1	1	0	0	1	1	1	1	1		1	1	1	1	1		1	1	1	1	1
gramatike	SSfs3	NNFS3----------	NNFS3----------	NNFS3----------	NNFS3----------	NNFS3----------	NNFS3-----A----	NNFS3-----A----	0	1	1	1	1	1	1	1	1	1	1	1	1	1	1	1	1	1	1	1	1	1	1	1	1	1	1	1	1	1	1
napísal	VLdscm+	V-MS---3R-AN---	V-MS---3R-AN---	V-MS---3R-AN---	V-MS---3R-AN---	V-MS---3R-AN---	VpYS---XR-AA---	VpYS---XR-AA---	0	1	1	1	1	1	1							1	1	1	1	0	0	1	1	1	1	1	1							1	1	1	1	0	0	1	1	1	1
o	Eu4	RR--4----------	RR--4-----------	RR--4-----------	RR--4-----------	RR--4-----------	RR--4----------	RR--4----------	0	1	1	1	1	1	1	1	1	1	1	1	1													1	1	1	1	1	1
generáciu	SSfs4	NNFS4----------	NNFS4----------	NNFS4----------	NNFS4----------	NNFS4----------	NNFS4-----A----	NNFS4-----A----	0	1	1	1	1	1	1	1	1	1	1	1	1	1	1	1	1	1	1	1	1	1	1	1	1	1	1	1	1	1	1
starší	AAmp1y	AAMP1----2-----	AAMS1----2-----	AAMP1----2-----	AAMS1----3-----	AAMP1----2-----	AAMS1----2A----	AAMS1----2A----	0	1	1	1	1	1	1	1	1	1	1	1	1	1	1	1	1	1	1	0	1	0	1	0	0	1	1	1	1	1	1
Matej	SSms1:r	NNMS1----------	NNMS1----------	NNMS1----------	NNMS1----------	NNMS1----------	NNMS1-----A----	NNMS1-----A----	0	1	1	1	1	1	1	1	1	1	1	1	1	1	1	1	1	1	1	1	1	1	1	1	1	1	1	1	1	1	1
Bel	SSms1:r	NNMS1----------	NNMS1----------	NNMS1----------	NNMS1----------	NNMS1----------	NNFP2-----A----	NNFP2-----A----	0	1	1	1	1	1	1	1	1	1	1	1	1	1	1	1	1	0	0	1	1	1	1	0	0	1	1	1	1	0	0
V	Eu6	RR--6----------	RR--6-----------	RR--6-----------	RR--6-----------	RR--6-----------	RR--6----------	RR--6----------	0	1	1	1	1	1	1	1	1	1	1	1	1													1	1	1	1	1	1
každom	PAis6	P4IS6----------	P4IS6----------	P4IS6----------	P4IS6----------	P4IS6----------	AAIS6----1A----	AAIS6----1A----	0	1	1	1	1	0	0	1	1	1	1	0	0	1	1	1	1	1	1	1	1	1	1	1	1	1	1	1	1	1	1
prípade	SSis6	NNIS6----------	NNIS6----------	NNIS6----------	NNIS6----------	NNIS6----------	NNIS6-----A----	NNIS6-----A----	0	1	1	1	1	1	1	1	1	1	1	1	1	1	1	1	1	1	1	1	1	1	1	1	1	1	1	1	1	1	1
aj	T	TT-------------	TT-------------	J^-------------	TT-------------	TT-------------	J^-------------	J^-------------	0	1	0	1	1	0	0	1	0	1	1	0	0
text	SSis1	NNIS1----------	NNIS1----------	NNIS1----------	NNIS1----------	NNIS1----------	NNIS1-----A----	NNIS1-----A----	0	1	1	1	1	1	1	1	1	1	1	1	1	1	1	1	1	1	1	1	1	1	1	1	1	1	1	1	1	1	1
jeho	PUis2	PZIS2----------	PZIS2----------	PZIS2----------	PZIS2----------	PZIS2----------	PSXXXIS3-------	PSXXXIS3-------	0	1	1	1	1	1	1	1	1	1	1	0	0	1	1	1	1	0	0	1	1	1	1	0	0	1	1	1	1	0	0
úvodu	SSis2	NNIS2----------	NNIS2----------	NNIS2----------	NNIS2----------	NNIS2----------	NNIS2-----A----	NNIS2-----A----	0	1	1	1	1	1	1	1	1	1	1	1	1	1	1	1	1	1	1	1	1	1	1	1	1	1	1	1	1	1	1
dal	VLjsci+	V-IS---3R-A----	V-IS---3R-A----	V-IS---3R-A----	V-IS---3R-A----	V-IS---3R-A----	VpYS---XR-AA---	VpYS---XR-AA---	0	1	1	1	1	1	1							1	1	1	1	0	0	1	1	1	1	1	1							1	1	1	1	0	0	1	1	1	1
Doležalovej	AFfs3x:r	AUFS3----1-----	AUFS3----1-----	AUFS3----1-----	AUFS3----1-----	AUFS3----1-----	NNMS1-----A----	X@-------------	0	1	1	1	1	0	0	1	1	1	1	0	0	1	1	1	1	0		1	1	1	1	1		1	1	1	1	0
gramatike	SSfs3	NNFS3----------	NNFS3----------	NNFS3----------	NNFS3----------	NNFS3----------	NNFS3-----A----	NNFS3-----A----	0	1	1	1	1	1	1	1	1	1	1	1	1	1	1	1	1	1	1	1	1	1	1	1	1	1	1	1	1	1	1
punc	SSis4	NNIS4----------	NNIS4----------	NNIS4----------	NNIS4----------	NNIS4----------	NNIS4-----A----	NNIS4-----A----	0	1	1	1	1	1	1	1	1	1	1	1	1	1	1	1	1	1	1	1	1	1	1	1	1	1	1	1	1	1	1
najautoritatívnejšieho	AAis2z	AAIS2----3-----	AAIS2----3-----	AAIS2----3-----	AAIS2----3-----	AAIS2----3-----	AAIS2----3A----	AAIS2----3A----	0	1	1	1	1	1	1	1	1	1	1	1	1	1	1	1	1	1	1	1	1	1	1	1	1	1	1	1	1	1	1
zdroja	SSis2	NNIS2----------	NNIS2----------	NNIS2----------	NNIS2----------	NNIS2----------	NNIS2-----A----	NNIS2-----A----	0	1	1	1	1	1	1	1	1	1	1	1	1	1	1	1	1	1	1	1	1	1	1	1	1	1	1	1	1	1	1
poznania	SSns2	NNNS2----------	NNNS2----------	NNNS2----------	NNNS2----------	NNNS2----------	NNNS2-----A----	NNNS2-----A----	0	1	1	1	1	1	1	1	1	1	1	1	1	1	1	1	1	1	1	1	1	1	1	1	1	1	1	1	1	1	1
vtedajšieho	AAis2x	AAIS2----1-----	AAIS2----1-----	AAIS2----1-----	AAIS2----1-----	AAIS2----1-----	AAIS2----1A----	AAIS2----1A----	0	1	1	1	1	1	1	1	1	1	1	1	1	1	1	1	1	1	1	1	1	1	1	1	1	1	1	1	1	1	1
spisovného	AAis2x	AAIS2----1-----	AAIS2----1-----	AAIS2----1-----	AAIS2----1-----	AAIS2----1-----	AAIS2----1A----	AAIS2----1A----	0	1	1	1	1	1	1	1	1	1	1	1	1	1	1	1	1	1	1	1	1	1	1	1	1	1	1	1	1	1	1
jazyka	SSis2	NNIS2----------	NNIS2----------	NNIS2----------	NNIS2----------	NNIS2----------	NNIS2-----A----	NNIS2-----A----	0	1	1	1	1	1	1	1	1	1	1	1	1	1	1	1	1	1	1	1	1	1	1	1	1	1	1	1	1	1	1
Čechov	SSmp2:r	NNMP2----------	NNMP2----------	NNMP2----------	NNMP2----------	NNMP2----------	NNMP2-----A----	NNMP2-----A----	0	1	1	1	1	1	1	1	1	1	1	1	1	1	1	1	1	1	1	1	1	1	1	1	1	1	1	1	1	1	1
i	O	J^-------------	J^-------------	J^-------------	J^-------------	J^-------------	J^-------------	J^-------------	0	1	1	1	1	1	1	1	1	1	1	1	1
Slovákov	SSmp2:r	NNMP2----------	NNMP2----------	NNMP2----------	NNMP2----------	NNMP2----------	NNMP2-----A----	NNMP2-----A----	0	1	1	1	1	1	1	1	1	1	1	1	1	1	1	1	1	1	1	1	1	1	1	1	1	1	1	1	1	1	1
Táto	PFfs1	PDFS1----------	PDFS1----------	PDFS1----------	PDFS1----------	PDFS1----------	PDFS1----------	PDFS1----------	0	1	1	1	1	1	1	1	1	1	1	1	1	1	1	1	1	1	1	1	1	1	1	1	1	1	1	1	1	1	1
kralická	AAfs1x	AAFS1----1-----	AAFS1----1-----	AAFS1----1-----	AAFS1----1-----	AAFS1----1-----	NNFS1-----A----	X@-------------	0	1	1	1	1	0	0	1	1	1	1	0	0	1	1	1	1	1		1	1	1	1	1		1	1	1	1	1
norma	SSfs1	NNFS1----------	NNFS1----------	NNFS1----------	NNFS1----------	NNFS1----------	NNFS1-----A----	NNFS1-----A----	0	1	1	1	1	1	1	1	1	1	1	1	1	1	1	1	1	1	1	1	1	1	1	1	1	1	1	1	1	1	1
je	VKesc+	VB-S---3P-AA---	V--S---3P-AA---	V--S---3P-AA---	V--S---3P-AA---	V--S---3P-AA---	VB-S---3P-AA---	VB-S---3P-AA---	0	1	1	1	1	1	1					1	1							1	1	1	1	1	1							1	1	1	1	1	1	1	1	1	1
dodnes	Dx	Db-------1-----	Db-------1-----	Db-------1-----	Db-------1-----	Db-------1-----	Db-------------	Db-------------	0	1	1	1	1	1	1	1	1	1	1	1	1
základom	SSis7	NNIS7----------	NNIS7----------	NNIS7----------	NNIS7----------	NNIS7----------	NNIS7-----A----	NNIS7-----A----	0	1	1	1	1	1	1	1	1	1	1	1	1	1	1	1	1	1	1	1	1	1	1	1	1	1	1	1	1	1	1
spisovnej	AAfs2x	AAFS2----1-----	AAFS2----1-----	AAFS2----1-----	AAFS2----1-----	AAFS2----1-----	AAFS2----1A----	AAFS2----1A----	0	1	1	1	1	1	1	1	1	1	1	1	1	1	1	1	1	1	1	1	1	1	1	1	1	1	1	1	1	1	1
češtiny	SSfs2	NNFS2----------	NNFS2----------	NNFS2----------	NNFS2----------	NNFS2----------	NNFS2-----A----	NNFS2-----A----	0	1	1	1	1	1	1	1	1	1	1	1	1	1	1	1	1	1	1	1	1	1	1	1	1	1	1	1	1	1	1
Štúrovský	AAis1x	AAIS1----1-----	AAIS1----1-----	AAIS1----1-----	AAIS1----1-----	AAIS1----1-----	AAIS1----1A----	AAIS1----1A----	0	1	1	1	1	1	1	1	1	1	1	1	1	1	1	1	1	1	1	1	1	1	1	1	1	1	1	1	1	1	1
nový	AAis1x	AAIS1----1-----	AAIS1----1-----	AAIS1----1-----	AAIS1----1-----	AAIS1----1-----	AAIS1----1A----	AAIS1----1A----	0	1	1	1	1	1	1	1	1	1	1	1	1	1	1	1	1	1	1	1	1	1	1	1	1	1	1	1	1	1	1
slovenský	AAis1x	AAIS1----1-----	AAIS1----1-----	AAIS1----1-----	AAIS1----1-----	AAIS1----1-----	AAIS1----1A----	AAIS1----1A----	0	1	1	1	1	1	1	1	1	1	1	1	1	1	1	1	1	1	1	1	1	1	1	1	1	1	1	1	1	1	1
spisovný	AAis1x	AAIS1----1-----	AAIS1----1-----	AAIS1----1-----	AAIS1----1-----	AAIS1----1-----	AAIS1----1A----	AAIS1----1A----	0	1	1	1	1	1	1	1	1	1	1	1	1	1	1	1	1	1	1	1	1	1	1	1	1	1	1	1	1	1	1
jazyk	SSis1	NNIS1----------	NNIS1----------	NNIS1----------	NNIS1----------	NNIS1----------	NNIS1-----A----	NNIS1-----A----	0	1	1	1	1	1	1	1	1	1	1	1	1	1	1	1	1	1	1	1	1	1	1	1	1	1	1	1	1	1	1
má	VKesc+	VB-S---3P-AA---	V--S---3P-AA---	V--S---3P-AA---	V--S---3P-AA---	V--S---3P-AA---	VB-S---3P-AA---	VB-S---3P-AA---	0	1	1	1	1	1	1					1	1							1	1	1	1	1	1							1	1	1	1	1	1	1	1	1	1
niekoľko	PUns4	PZNS4----------	PZNS4----------	PZNS4----------	PZNS4----------	PZNS4----------	Ca--X----------	Ca--X----------	0	1	1	1	1	0	0	1	1	1	1	0	0	1	1	1	1			1	1	1	1			1	1	1	1	0	0
vrstiev	SSfp2	NNFP2----------	NNFP2----------	NNFP2----------	NNFP2----------	NNFP2----------	NNFP2-----A----	NNFP2-----A----	0	1	1	1	1	1	1	1	1	1	1	1	1	1	1	1	1	1	1	1	1	1	1	1	1	1	1	1	1	1	1
Radikálnou	AAfs7x	AAFS7----1-----	AAFS7----1-----	AAFS7----1-----	AAFS7----1-----	AAFS7----1-----	AAFS7----1A----	AAFS7----1A----	0	1	1	1	1	1	1	1	1	1	1	1	1	1	1	1	1	1	1	1	1	1	1	1	1	1	1	1	1	1	1
inováciou	SSfs7	NNFS7----------	NNFS7----------	NNFS7----------	NNFS7----------	NNFS7----------	NNFS7-----A----	NNFS7-----A----	0	1	1	1	1	1	1	1	1	1	1	1	1	1	1	1	1	1	1	1	1	1	1	1	1	1	1	1	1	1	1
je	VKesc+	VB-S---3P-AA---	V--S---3P-AA---	V--S---3P-AA---	V--S---3P-AA---	V--S---3P-AA---	VB-S---3P-AA---	VB-S---3P-AA---	0	1	1	1	1	1	1					1	1							1	1	1	1	1	1							1	1	1	1	1	1	1	1	1	1
hláskoslovie	SSns1	NNNS1----------	NNNS1----------	NNNS1----------	NNNS1----------	NNNS1----------	NNNS1-----A----	NNNS1-----A----	0	1	1	1	1	1	1	1	1	1	1	1	1	1	1	1	1	1	1	1	1	1	1	1	1	1	1	1	1	1	1
a	O	J^-------------	J^-------------	J^-------------	J^-------------	J^-------------	J^-------------	J^-------------	0	1	1	1	1	1	1	1	1	1	1	1	1
tvaroslovie	SSns1	NNNS1----------	NNNS1----------	NNNS1----------	NNNS1----------	NNNS1----------	NNNS1-----A----	NNNS1-----A----	0	1	1	1	1	1	1	1	1	1	1	1	1	1	1	1	1	1	1	1	1	1	1	1	1	1	1	1	1	1	1
Ľubomír	SSms1:r	NNMS1----------	NNMS1----------	NNMS1----------	NNMS1----------	NNMS1----------	NNMS1-----A----	NNMS1-----A----	0	1	1	1	1	1	1	1	1	1	1	1	1	1	1	1	1	1	1	1	1	1	1	1	1	1	1	1	1	1	1
Ďurovič	SSms1:r	NNMS1----------	NNMS1----------	NNMS1----------	NNMS1----------	NNMS1----------	NNMS1-----A----	X@-------------	0	1	1	1	1	1	0	1	1	1	1	1	0	1	1	1	1	1		1	1	1	1	1		1	1	1	1	1
Profesor	SSms1	NNMS1----------	NNMS1----------	NNMS1----------	NNMS1----------	NNMS1----------	NNMS1-----A----	NNMS1-----A----	0	1	1	1	1	1	1	1	1	1	1	1	1	1	1	1	1	1	1	1	1	1	1	1	1	1	1	1	1	1	1
Eugen	SSms1:r	NNMS1----------	NNMS1----------	NNMS1----------	NNMS1----------	NNMS1----------	NNMS1-----A----	NNMS1-----A----	0	1	1	1	1	1	1	1	1	1	1	1	1	1	1	1	1	1	1	1	1	1	1	1	1	1	1	1	1	1	1
Jóna	SSms1:r	NNMS1----------	NNMS1----------	NNMS1----------	NNMS1----------	NNMS1----------	NNMS1-----A----	X@-------------	0	1	1	1	1	1	0	1	1	1	1	1	0	1	1	1	1	1		1	1	1	1	1		1	1	1	1	1
ktorý	PAms1	P4MS1----------	P4MS1----------	P4MS1----------	P4MS1----------	P4MS1----------	P4MS1----------	P4MS1----------	0	1	1	1	1	1	1	1	1	1	1	1	1	1	1	1	1	1	1	1	1	1	1	1	1	1	1	1	1	1	1
sa	R	P4MS1----------	P4MS1----------	P4MS1----------	P4MS1----------	P4MS1----------	P7-X4----------	P7-X4----------	0	1	1	1	1	1	1	1	1	1	1	0	0	1	1	1	1			1	1	1	1	0	0	1	1	1	1	0	0
dejinami	SSfp7	NNFP7----------	NNFP7----------	NNFP7----------	NNFP7----------	NNFP7----------	NNFP7-----A----	NNFP7-----A----	0	1	1	1	1	1	1	1	1	1	1	1	1	1	1	1	1	1	1	1	1	1	1	1	1	1	1	1	1	1	1
spisovnej	AAfs2x	AAFS2----1-----	AAFS2----1-----	AAFS2----1-----	AAFS2----1-----	AAFS2----1-----	AAFS2----1A----	AAFS2----1A----	0	1	1	1	1	1	1	1	1	1	1	1	1	1	1	1	1	1	1	1	1	1	1	1	1	1	1	1	1	1	1
slovenčiny	SSfs2	NNFS2----------	NNFS2----------	NNFS2----------	NNFS2----------	NNFS2----------	NNFS2-----A----	NNFS2-----A----	0	1	1	1	1	1	1	1	1	1	1	1	1	1	1	1	1	1	1	1	1	1	1	1	1	1	1	1	1	1	1
dlhé	AAip4x	AAIP4----1-----	AAIP4----1-----	AAIP4----1-----	AAIP4----1-----	AAIP4----1-----	AANP4----1A----	AANP4----1A----	0	1	1	1	1	1	1	1	1	1	1	1	1	1	1	1	1	0	0	1	1	1	1	1	1	1	1	1	1	1	1
roky	SSip4	NNIP4----------	NNIP4----------	NNIP4----------	NNIP4----------	NNIP4----------	NNIP4-----A----	NNIP4-----A----	0	1	1	1	1	1	1	1	1	1	1	1	1	1	1	1	1	1	1	1	1	1	1	1	1	1	1	1	1	1	1
zaoberal	VLescm+	V-MS---3R-AA---	V-MS---3R-AA---	V-MS---3R-AA---	V-MS---3R-AA---	V-MS---3R-AA---	VpYS---XR-AA---	VpYS---XR-AA---	0	1	1	1	1	1	1							1	1	1	1	0	0	1	1	1	1	1	1							1	1	1	1	0	0	1	1	1	1
si	R	V-MS---3R-AA---	V-MS---3R-AA---	V-MS---3R-AA---	Z:------------	V-MS---3R-AA---	P7-X3----------	P7-X3----------	0	1	1	0	1	0	0							1	1		1			1	1		1	0	0							1	1		1			1	1		1
uvedomil	VLdscm+	V-MS---3R-AN---	V-MS---3R-AN---	V-MS---3R-AN---	V-MS---3R-AN---	V-MS---3R-AN---	VpYS---XR-AA---	VpYS---XR-AA---	0	1	1	1	1	1	1							1	1	1	1	0	0	1	1	1	1	1	1							1	1	1	1	0	0	1	1	1	1
potrebu	SSfs4	NNFS4----------	NNFS4----------	NNFS4----------	NNFS4----------	NNFS4----------	NNFS4-----A----	NNFS4-----A----	0	1	1	1	1	1	1	1	1	1	1	1	1	1	1	1	1	1	1	1	1	1	1	1	1	1	1	1	1	1	1
dať	VIj+	Vf--------A----	Vf--------A----	Vf--------A----	Vf--------A----	Vf--------A----	Vf--------A----	Vf--------A----	0	1	1	1	1	1	1	1	1	1	1	1	1
do	Eu2	RR--2----------	RR--2-----------	RR--2-----------	RR--2-----------	RR--2-----------	RR--2----------	RR--2----------	0	1	1	1	1	1	1	1	1	1	1	1	1													1	1	1	1	1	1
rúk	SSfp2	NNFP2----------	NNFP2----------	NNFP2----------	NNFP2----------	NNFP2----------	NNFP2-----A----	NNFP2-----A----	0	1	1	1	1	1	1	1	1	1	1	1	1	1	1	1	1	1	1	1	1	1	1	1	1	1	1	1	1	1	1
slovenskej	AAfs2x	AAFS2----1-----	AAFS2----1-----	AAFS2----1-----	AAFS2----1-----	AAFS2----1-----	AAFS2----1A----	AAFS2----1A----	0	1	1	1	1	1	1	1	1	1	1	1	1	1	1	1	1	1	1	1	1	1	1	1	1	1	1	1	1	1	1
i	O	J^-------------	J^-------------	J^-------------	J^-------------	J^-------------	J^-------------	J^-------------	0	1	1	1	1	1	1	1	1	1	1	1	1
medzinárodnej	AAfs2x	AAFS2----1-----	AAFS2----1-----	AAFS2----1-----	AAFS2----1-----	AAFS2----1-----	AAFS2----1A----	AAFS2----1A----	0	1	1	1	1	1	1	1	1	1	1	1	1	1	1	1	1	1	1	1	1	1	1	1	1	1	1	1	1	1	1
vedeckej	AAfs2x	AAFS2----1-----	AAFS2----1-----	AAFS2----1-----	AAFS2----1-----	AAFS2----1-----	AAFS2----1A----	AAFS2----1A----	0	1	1	1	1	1	1	1	1	1	1	1	1	1	1	1	1	1	1	1	1	1	1	1	1	1	1	1	1	1	1
verejnosti	SSfs2	NNFS2----------	NNFS2----------	NNFS2----------	NNFS2----------	NNFS2----------	NNFS2-----A----	NNFS2-----A----	0	1	1	1	1	1	1	1	1	1	1	1	1	1	1	1	1	1	1	1	1	1	1	1	1	1	1	1	1	1	1
dostatočne	Dx	Db-------1-----	Db-------1-----	Db-------1-----	Db-------1-----	Db-------1-----	Dg-------1A----	Dg-------1A----	0	1	1	1	1	1	1	1	1	1	1	0	0
prístupný	AAis4x	AAIS4----1-----	AAIS4----1-----	AAIS4----1-----	AAIS4----1-----	AAIS4----1-----	AAIS4----1A----	AAIS4----1A----	0	1	1	1	1	1	1	1	1	1	1	1	1	1	1	1	1	1	1	1	1	1	1	1	1	1	1	1	1	1	1
skutočný	AAis4x	AAIS4----1-----	AAIS4----1-----	AAIS4----1-----	AAIS4----1-----	AAIS4----1-----	AAIS4----1A----	AAIS4----1A----	0	1	1	1	1	1	1	1	1	1	1	1	1	1	1	1	1	1	1	1	1	1	1	1	1	1	1	1	1	1	1
text	SSis4	NNIS4----------	NNIS4----------	NNIS4----------	NNIS4----------	NNIS4----------	NNIS4-----A----	NNIS4-----A----	0	1	1	1	1	1	1	1	1	1	1	1	1	1	1	1	1	1	1	1	1	1	1	1	1	1	1	1	1	1	1
tohto	PFns2	PDNS2----------	PDNS2----------	PDNS2----------	PDNS2----------	PDNS2----------	PDIS2----------	PDIS2----------	0	1	1	1	1	1	1	1	1	1	1	1	1	1	1	1	1	0	0	1	1	1	1	1	1	1	1	1	1	1	1
základného	AAns2x	AANS2----1-----	AANS2----1-----	AANS2----1-----	AANS2----1-----	AANS2----1-----	AANS2----1A----	AANS2----1A----	0	1	1	1	1	1	1	1	1	1	1	1	1	1	1	1	1	1	1	1	1	1	1	1	1	1	1	1	1	1	1
diela	SSns2	NNNS2----------	NNNS2----------	NNNS2----------	NNNS2----------	NNNS2----------	NNNS2-----A----	NNNS2-----A----	0	1	1	1	1	1	1	1	1	1	1	1	1	1	1	1	1	1	1	1	1	1	1	1	1	1	1	1	1	1	1
Ľubomír	SSms1:r	NNMS1----------	NNMS1----------	NNMS1----------	NNMS1----------	NNMS1----------	NNMS1-----A----	NNMS1-----A----	0	1	1	1	1	1	1	1	1	1	1	1	1	1	1	1	1	1	1	1	1	1	1	1	1	1	1	1	1	1	1
Ďurovič	SSms1:r	NNMS1----------	NNMS1----------	NNMS1----------	NNMS1----------	NNMS1----------	NNMS1-----A----	X@-------------	0	1	1	1	1	1	0	1	1	1	1	1	0	1	1	1	1	1		1	1	1	1	1		1	1	1	1	1
Ľubomír	SSms1:r	NNMS1----------	NNMS1----------	NNMS1----------	NNMS1----------	NNMS1----------	NNMS1-----A----	NNMS1-----A----	0	1	1	1	1	1	1	1	1	1	1	1	1	1	1	1	1	1	1	1	1	1	1	1	1	1	1	1	1	1	1
Ďurovič	SSms1:r	NNMS1----------	NNMS1----------	NNMS1----------	NNMS1----------	NNMS1----------	NNMS1-----A----	X@-------------	0	1	1	1	1	1	0	1	1	1	1	1	0	1	1	1	1	1		1	1	1	1	1		1	1	1	1	1
profesor	SSms1	NNMS1----------	NNMS1----------	NNMS1----------	NNMS1----------	NNMS1----------	NNMS1-----A----	NNMS1-----A----	0	1	1	1	1	1	1	1	1	1	1	1	1	1	1	1	1	1	1	1	1	1	1	1	1	1	1	1	1	1	1
slovanských	AAip2x	AAIP2----1-----	AAIP2----1-----	AAIP2----1-----	AAIP2----1-----	AAIP2----1-----	AAIP2----1A----	AAIP2----1A----	0	1	1	1	1	1	1	1	1	1	1	1	1	1	1	1	1	1	1	1	1	1	1	1	1	1	1	1	1	1	1
jazykov	SSip2	NNIP2----------	NNIP2----------	NNIP2----------	NNIP2----------	NNIP2----------	NNIP2-----A----	NNIP2-----A----	0	1	1	1	1	1	1	1	1	1	1	1	1	1	1	1	1	1	1	1	1	1	1	1	1	1	1	1	1	1	1
Česko	Q	NNIP2----------	NNIP2----------	NNIP2----------	NNIP2----------	NNIP2----------	A2-------------	NNNS1-----A----	0	1	1	1	1	0	1	1	1	1	1	0	1	1	1	1	1		0	1	1	1	1		0	1	1	1	1		0
slovenské	AAns1x	AANS1----1-----	AANS1----1-----	AANS1----1-----	AANS1----1-----	AANS1----1-----	AANS4----1A----	AANS1----1A----	0	1	1	1	1	1	1	1	1	1	1	1	1	1	1	1	1	1	1	1	1	1	1	1	1	1	1	1	1	0	1
kultúrne	AAns1x	AANS1----1-----	AANS1----1-----	AANS1----1-----	AANS1----1-----	AANS1----1-----	AANS4----1A----	Dg-------1A----	0	1	1	1	1	1	0	1	1	1	1	1	0	1	1	1	1	1		1	1	1	1	1		1	1	1	1	0
kontinuum	SSns1	NNNS1----------	NNNS4----------	NNNS1----------	NNNS1----------	NNNS1----------	NNNS4-----A----	X@-------------	0	1	1	1	1	1	0	1	1	1	1	1	0	1	1	1	1	1		1	1	1	1	1		0	1	1	1	0
Ku	Ev3	RV--3----------	RV--3-----------	RV--3-----------	RV--3-----------	RV--3-----------	RV--3----------	RV--3----------	0	1	1	1	1	1	1	1	1	1	1	1	1													1	1	1	1	1	1
konfliktom	SSip3	NNIP3----------	NNIP3----------	NNIP3----------	NNIP3----------	NNIP3----------	NNIP3-----A----	NNIP3-----A----	0	1	1	1	1	1	1	1	1	1	1	1	1	1	1	1	1	1	1	1	1	1	1	1	1	1	1	1	1	1	1
a	O	J^-------------	J^-------------	J^-------------	J^-------------	J^-------------	J^-------------	J^-------------	0	1	1	1	1	1	1	1	1	1	1	1	1
nedorozumeniam	SSnp3	NNNP3----------	NNNP3----------	NNNP3----------	NNNP3----------	NNNP3----------	NNNP3-----A----	NNNP3-----A----	0	1	1	1	1	1	1	1	1	1	1	1	1	1	1	1	1	1	1	1	1	1	1	1	1	1	1	1	1	1	1
výrazne	Dx	Db-------1-----	Db-------1-----	Db-------1-----	Db-------1-----	Db-------1-----	Dg-------1A----	Dg-------1A----	0	1	1	1	1	1	1	1	1	1	1	0	0
prispelo	VLdscn+	V-NX---3R-AN---	V-NX---3R-AN---	V-NX---3R-AN---	V-NX---3R-AN---	V-NX---3R-AN---	VpNS---XR-AA---	VpNS---XR-AA---	0	1	1	1	1	1	1							1	1	1	1	1	1	1	1	1	1	0	0							1	1	1	1	0	0	1	1	1	1
aj	T	TT-------------	TT-------------	TT-------------	TT-------------	TT-------------	J^-------------	J^-------------	0	1	1	1	1	0	0	1	1	1	1	0	0
to	PFns1	PDNS1----------	PDNS1----------	PDNS1----------	PDNS1----------	PDNS1----------	PDNS1----------	PDNS1----------	0	1	1	1	1	1	1	1	1	1	1	1	1	1	1	1	1	1	1	1	1	1	1	1	1	1	1	1	1	1	1
že	O	J^-------------	J^-------------	J^-------------	J^-------------	J^-------------	J,-------------	J,-------------	0	1	1	1	1	1	1	1	1	1	1	0	0
sa	R	J^-------------	J^-------------	J^-------------	J^-------------	J^-------------	P7-X4----------	P7-X4----------	0	1	1	1	1	0	0	1	1	1	1	0	0
maďarské	AAns1x	AANS1----1-----	AANS1----1-----	AANS1----1-----	AANS1----1-----	AANS1----1-----	AANS1----1A----	AANS1----1A----	0	1	1	1	1	1	1	1	1	1	1	1	1	1	1	1	1	1	1	1	1	1	1	1	1	1	1	1	1	1	1
nemzet	Q	AANS1----1-----	AANS1----1-----	AANS1----1-----	NNNS1----------	NNIS1----------	VpNS---XR-AA---	X@-------------	0	1	1	0	0	0	0	1	1	0	0	0	0	1	1	1	0	1		1	1	1	1	1		1	1	1	1
dá	VKjsc+	VB-S---3P-A----	V--S---3P-A----	V--S---3P-A----	V--S---3P-AA---	V--S---3P-A----	VB-S---3P-AA---	VB-S---3P-AA---	0	1	1	1	1	1	1					1	1							1	1	1	1	1	1							1	1	1	1	1	1	1	1	1	1
používať	VIe+	Vf--------AA---	Vf--------AA---	Vf--------AA---	Vf--------AA---	Vf--------AA---	Vf--------A----	Vf--------A----	0	1	1	1	1	1	1	1	1	1	1	1	1
v	Eu6	RR--6----------	RR--6-----------	RR--6-----------	RR--6-----------	RR--6-----------	RR--6----------	RR--6----------	0	1	1	1	1	1	1	1	1	1	1	1	1													1	1	1	1	1	1
oboch	NNip6	CxIP6----------	CxIP6----------	CxIP6----------	CxIP6----------	CxIP6----------	ClXP6----------	ClXP6----------	0	1	1	1	1	1	1	1	1	1	1	0	0	1	1	1	1	0	0	1	1	1	1	1	1	1	1	1	1	1	1
týchto	PFip6	PDIP6----------	PDIP6----------	PDIP6----------	PDIP6----------	PDIP6----------	PDXP6----------	PDXP6----------	0	1	1	1	1	1	1	1	1	1	1	1	1	1	1	1	1	0	0	1	1	1	1	1	1	1	1	1	1	1	1
významoch	SSip6	NNIP6----------	NNIP6----------	NNIP6----------	NNIP6----------	NNIP6----------	NNIP6-----A----	NNIP6-----A----	0	1	1	1	1	1	1	1	1	1	1	1	1	1	1	1	1	1	1	1	1	1	1	1	1	1	1	1	1	1	1
To	PFns1	PDNS1----------	PDNS1----------	PDNS1----------	PDNS1----------	PDNS1----------	PDNS1----------	PDNS1----------	0	1	1	1	1	1	1	1	1	1	1	1	1	1	1	1	1	1	1	1	1	1	1	1	1	1	1	1	1	1	1
malo	VLescn+	V-NX---3R-AA---	V-NX---3R-AA---	V-NX---3R-AA---	V-NX---3R-AA---	V-NX---3R-AA---	VpNS---XR-AA---	VpNS---XR-AA---	0	1	1	1	1	1	1							1	1	1	1	1	1	1	1	1	1	0	0							1	1	1	1	0	0	1	1	1	1
obrovský	AAis4x	AAIS4----1-----	AAIS4----1-----	AAIS4----1-----	AAIS4----1-----	AAIS4----1-----	AAIS4----1A----	AAIS4----1A----	0	1	1	1	1	1	1	1	1	1	1	1	1	1	1	1	1	1	1	1	1	1	1	1	1	1	1	1	1	1	1
národnozáchovný	AAis4x	AAIS4----1-----	AAIS4----1-----	AAIS4----1-----	AAIS4----1-----	AAIS4----1-----	AAIS4----1A----	X@-------------	0	1	1	1	1	1	0	1	1	1	1	1	0	1	1	1	1	1		1	1	1	1	1		1	1	1	1	1
význam	SSis4	NNIS4----------	NNIS4----------	NNIS4----------	NNIS4----------	NNIS4----------	NNIS4-----A----	NNIS4-----A----	0	1	1	1	1	1	1	1	1	1	1	1	1	1	1	1	1	1	1	1	1	1	1	1	1	1	1	1	1	1	1
v	Eu6	RR--6----------	RR--6-----------	RR--6-----------	RR--6-----------	RR--6-----------	RR--6----------	RR--6----------	0	1	1	1	1	1	1	1	1	1	1	1	1													1	1	1	1	1	1
druhej	NAfs6	CxFS6----------	CxFS6----------	CxFS6----------	CxFS6----------	CxFS6----------	AAFS6----1A----	AAFS6----1A----	0	1	1	1	1	0	0	1	1	1	1	0	0	1	1	1	1	1	1	1	1	1	1	1	1	1	1	1	1	1	1
polovici	SSfs6	NNFS6----------	NNFS6----------	NNFS6----------	NNFS6----------	NNFS6----------	NNFS6-----A----	NNFS6-----A----	0	1	1	1	1	1	1	1	1	1	1	1	1	1	1	1	1	1	1	1	1	1	1	1	1	1	1	1	1	1	1
storočia	SSns2	NNNS2----------	NNNS2----------	NNNS2----------	NNNS2----------	NNNS2----------	NNNS2-----A----	NNNS2-----A----	0	1	1	1	1	1	1	1	1	1	1	1	1	1	1	1	1	1	1	1	1	1	1	1	1	1	1	1	1	1	1
keď	O	J^-------------	J^-------------	J^-------------	J^-------------	J^-------------	J,-------------	J,-------------	0	1	1	1	1	1	1	1	1	1	1	0	0
maďarizácia	SSfs1	NNFS1----------	NNFS1----------	NNFS1----------	NNFS1----------	NNFS1----------	NNFS1-----A----	NNFS1-----A----	0	1	1	1	1	1	1	1	1	1	1	1	1	1	1	1	1	1	1	1	1	1	1	1	1	1	1	1	1	1	1
reálne	Dx	Db-------1-----	Db-------1-----	Db-------1-----	Db-------1-----	Db-------1-----	Dg-------1A----	Dg-------1A----	0	1	1	1	1	1	1	1	1	1	1	0	0
ohrozovala	VLescf+	V-FS---3R-AA---	V-FS---3R-AA---	V-FS---3R-AA---	V-FS---3R-AA---	V-FS---3R-AA---	VpFS---XR-AA---	VpFS---XR-AA---	0	1	1	1	1	1	1							1	1	1	1	1	1	1	1	1	1	1	1							1	1	1	1	0	0	1	1	1	1
samotnú	AAfs4x	AAFS4----1-----	AAFS4----1-----	AAFS4----1-----	AAFS4----1-----	AAFS4----1-----	AAFS4----1A----	AAFS4----1A----	0	1	1	1	1	1	1	1	1	1	1	1	1	1	1	1	1	1	1	1	1	1	1	1	1	1	1	1	1	1	1
existenciu	SSfs4	NNFS4----------	NNFS4----------	NNFS4----------	NNFS4----------	NNFS4----------	NNFS4-----A----	NNFS4-----A----	0	1	1	1	1	1	1	1	1	1	1	1	1	1	1	1	1	1	1	1	1	1	1	1	1	1	1	1	1	1	1
slovenského	AAis2x	AAIS2----1-----	AAIS2----1-----	AAIS2----1-----	AAIS2----1-----	AAIS2----1-----	AAIS2----1A----	AAIS2----1A----	0	1	1	1	1	1	1	1	1	1	1	1	1	1	1	1	1	1	1	1	1	1	1	1	1	1	1	1	1	1	1
národa	SSis2	NNIS2----------	NNIS2----------	NNIS2----------	NNIS2----------	NNIS2----------	NNIS2-----A----	NNIS2-----A----	0	1	1	1	1	1	1	1	1	1	1	1	1	1	1	1	1	1	1	1	1	1	1	1	1	1	1	1	1	1	1
Ľubomír	SSms1:r	NNMS1----------	NNMS1----------	NNMS1----------	NNMS1----------	NNMS1----------	NNMS1-----A----	NNMS1-----A----	0	1	1	1	1	1	1	1	1	1	1	1	1	1	1	1	1	1	1	1	1	1	1	1	1	1	1	1	1	1	1
Ďurovič	SSms1:r	NNMS1----------	NNMS1----------	NNMS1----------	NNMS1----------	NNMS1----------	NNMS1-----A----	X@-------------	0	1	1	1	1	1	0	1	1	1	1	1	0	1	1	1	1	1		1	1	1	1	1		1	1	1	1	1
Mal	VLesam+	V-MS---1R-AA---	V-MS---1R-AA---	V-MS---1R-AA---	V-MS---1R-AA---	V-MS---1R-AA---	VpYS---XR-AA---	VpYS---XR-AA---	0	1	1	1	1	1	1							1	1	1	1	0	0	1	1	1	1	1	1							1	1	1	1	0	0	1	1	1	1
som	VKesa+	VB-S---1P-AA---	V--S---1P-AA---	V--S---1P-AA---	V--S---1P-AA---	V--S---1P-AA---	VB-S---1P-AA---	VB-S---1P-AA---	0	1	1	1	1	1	1					1	1							1	1	1	1	1	1							1	1	1	1	1	1	1	1	1	1
veľké	AAns4x	AANS4----1-----	AANS4----1-----	AANS4----1-----	AANS4----1-----	AANS4----1-----	AANS4----1A----	AANS4----1A----	0	1	1	1	1	1	1	1	1	1	1	1	1	1	1	1	1	1	1	1	1	1	1	1	1	1	1	1	1	1	1
potešenie	SSns4	NNNS4----------	NNNS4----------	NNNS4----------	NNNS4----------	NNNS4----------	NNNS4-----A----	NNNS4-----A----	0	1	1	1	1	1	1	1	1	1	1	1	1	1	1	1	1	1	1	1	1	1	1	1	1	1	1	1	1	1	1
z	Eu2	RR--2----------	RR--2-----------	RR--2-----------	RR--2-----------	RR--2-----------	RR--2----------	RR--2----------	0	1	1	1	1	1	1	1	1	1	1	1	1													1	1	1	1	1	1
knižky	SSfs2	NNFS2----------	NNFS2----------	NNFS2----------	NNFS2----------	NNFS2----------	NNFS2-----A----	NNFS2-----A----	0	1	1	1	1	1	1	1	1	1	1	1	1	1	1	1	1	1	1	1	1	1	1	1	1	1	1	1	1	1	1
Antona	SSms2:r	NNMS2----------	NNMS2----------	NNMS2----------	NNMS2----------	NNMS2----------	NNMS2-----A----	NNMS2-----A----	0	1	1	1	1	1	1	1	1	1	1	1	1	1	1	1	1	1	1	1	1	1	1	1	1	1	1	1	1	1	1
Dinku	SSms2:r	NNMS2----------	NNMS2----------	NNMS2----------	NNMS2----------	NNMS2----------	NNMS2-----A----	X@-------------	0	1	1	1	1	1	0	1	1	1	1	1	0	1	1	1	1	1		1	1	1	1	1		1	1	1	1	1
Skalica	SSfs1:r	NNFS1----------	NNFS1----------	NNFS1----------	NNFS1----------	NNFS1----------	NNFS1-----A----	NNFS1-----A----	0	1	1	1	1	1	1	1	1	1	1	1	1	1	1	1	1	1	1	1	1	1	1	1	1	1	1	1	1	1	1
moja	PFfs1	PDFS1----------	PDFS1----------	PDFS1----------	PDFS1----------	PDFS1----------	PSFS1-S1-------	PSFS1-S1-------	0	1	1	1	1	1	1	1	1	1	1	0	0	1	1	1	1	1	1	1	1	1	1	1	1	1	1	1	1	1	1
láska	SSfs1	NNFS1----------	NNFS1----------	NNFS1----------	NNFS1----------	NNFS1----------	NNFS1-----A----	NNFS1-----A----	0	1	1	1	1	1	1	1	1	1	1	1	1	1	1	1	1	1	1	1	1	1	1	1	1	1	1	1	1	1	1
osud	SSis1	NNIS1----------	NNIS1----------	NNIS1----------	NNIS1----------	NNIS1----------	NNIS1-----A----	NNIS1-----A----	0	1	1	1	1	1	1	1	1	1	1	1	1	1	1	1	1	1	1	1	1	1	1	1	1	1	1	1	1	1	1
a	O	J^-------------	J^-------------	J^-------------	J^-------------	J^-------------	J^-------------	J^-------------	0	1	1	1	1	1	1	1	1	1	1	1	1
poťešeňí	Q	J^-------------	J^-------------	J^-------------	NNNS1----------	J^-------------	NNNP1-----A----	X@-------------	0	1	1	0	1	0	0	1	1	0	1	0	0
Jeho	PUmp1	PZMP1----------	PZMP1----------	PZMP1----------	PZMP1----------	PZMP1----------	PSXXXIS3-------	PSXXXIS3-------	0	1	1	1	1	1	1	1	1	1	1	0	0	1	1	1	1	0	0	1	1	1	1	0	0	1	1	1	1	0	0
obaja	NNmp1	CxMP1----------	CxMP1----------	CxMP1----------	CxMP1----------	CxMP1----------	ClMP1----------	ClMP1----------	0	1	1	1	1	1	1	1	1	1	1	0	0	1	1	1	1	1	1	1	1	1	1	1	1	1	1	1	1	1	1
starší	AAmp1y	AAMP1----2-----	AAMP1----2-----	AAMP1----2-----	AAMP1----3-----	AAMP1----2-----	AAMP1----2A----	AAMP1----2A----	0	1	1	1	1	1	1	1	1	1	1	1	1	1	1	1	1	1	1	1	1	1	1	1	1	1	1	1	1	1	1
bratia	SSmp1	NNMP1----------	NNMP1----------	NNMP1----------	NNMP1----------	NNMP1----------	NNMP1-----A----	NNMP1-----A----	0	1	1	1	1	1	1	1	1	1	1	1	1	1	1	1	1	1	1	1	1	1	1	1	1	1	1	1	1	1	1
išli	VLepcm+	V-MP---3R-AA---	V-MP---3R-AA---	V-MP---3R-AA---	V-MP---3R-AA---	V-MP---3R-AA---	VpXP---XR-AA---	VpXP---XR-AA---	0	1	1	1	1	1	1							1	1	1	1	0	0	1	1	1	1	1	1							1	1	1	1	0	0	1	1	1	1
do	Eu2	RR--2----------	RR--2-----------	RR--2-----------	RR--2-----------	RR--2-----------	RR--2----------	RR--2----------	0	1	1	1	1	1	1	1	1	1	1	1	1													1	1	1	1	1	1
škôl	SSfp2	NNFP2----------	NNFP2----------	NNFP2----------	NNFP2----------	NNFP2----------	NNFP2-----A----	NNFP2-----A----	0	1	1	1	1	1	1	1	1	1	1	1	1	1	1	1	1	1	1	1	1	1	1	1	1	1	1	1	1	1	1
a	O	J^-------------	J^-------------	J^-------------	J^-------------	J^-------------	J^-------------	J^-------------	0	1	1	1	1	1	1	1	1	1	1	1	1
Ferda	SSms1:r	NNMS1----------	NNMS1----------	NNMS1----------	NNMS1----------	NNMS1----------	NNMS1-----A----	X@-------------	0	1	1	1	1	1	0	1	1	1	1	1	0	1	1	1	1	1		1	1	1	1	1		1	1	1	1	1
mal	VLescm+	V-MS---3R-AA---	V-MS---3R-AA---	V-MS---3R-AA---	V-MS---3R-AA---	V-MS---3R-AA---	VpYS---XR-AA---	VpYS---XR-AA---	0	1	1	1	1	1	1							1	1	1	1	0	0	1	1	1	1	1	1							1	1	1	1	0	0	1	1	1	1
prevziať	VId+	Vf--------AN---	Vf--------AN---	Vf--------AN---	Vf--------AN---	Vf--------AN---	Vf--------A----	Vf--------A----	0	1	1	1	1	1	1	1	1	1	1	1	1
obchod	SSis4	NNIS4----------	NNIS4----------	NNIS4----------	NNIS4----------	NNIS4----------	NNIS4-----A----	NNIS4-----A----	0	1	1	1	1	1	1	1	1	1	1	1	1	1	1	1	1	1	1	1	1	1	1	1	1	1	1	1	1	1	1
Intenzívne	Dx	Db-------1-----	Db-------1-----	Db-------1-----	Db-------1-----	Db-------1-----	Dg-------1A----	Dg-------1A----	0	1	1	1	1	1	1	1	1	1	1	0	0
sa	R	Db-------1-----	Db-------1-----	Db-------1-----	Db-------1-----	Db-------1-----	P7-X4----------	P7-X4----------	0	1	1	1	1	0	0	1	1	1	1	0	0
pamätám	VKesa+	VB-S---1P-AA---	V--S---1P-AA---	V--S---1P-AA---	V--S---1P-AA---	V--S---1P-AA---	VB-S---1P-AA---	VB-S---1P-AA---	0	1	1	1	1	1	1					1	1							1	1	1	1	1	1							1	1	1	1	1	1	1	1	1	1
na	Eu4	RR--4----------	RR--4-----------	RR--4-----------	RR--4-----------	RR--4-----------	RR--4----------	RR--4----------	0	1	1	1	1	1	1	1	1	1	1	1	1													1	1	1	1	1	1
prístavbu	SSfs4	NNFS4----------	NNFS4----------	NNFS4----------	NNFS4----------	NNFS4----------	NNFS4-----A----	NNFS4-----A----	0	1	1	1	1	1	1	1	1	1	1	1	1	1	1	1	1	1	1	1	1	1	1	1	1	1	1	1	1	1	1
javiska	SSns2	NNNS2----------	NNNS2----------	NNNS2----------	NNNS2----------	NNNS2----------	NNNS2-----A----	NNNS2-----A----	0	1	1	1	1	1	1	1	1	1	1	1	1	1	1	1	1	1	1	1	1	1	1	1	1	1	1	1	1	1	1
k	Eu3	RR--3----------	RR--3-----------	RR--3-----------	RR--3-----------	RR--3-----------	RR--3----------	RR--3----------	0	1	1	1	1	1	1	1	1	1	1	1	1													1	1	1	1	1	1
cirkevnej	AAfs3x	AAFS3----1-----	AAFS3----1-----	AAFS3----1-----	AAFS3----1-----	AAFS3----1-----	AAFS3----1A----	AAFS3----1A----	0	1	1	1	1	1	1	1	1	1	1	1	1	1	1	1	1	1	1	1	1	1	1	1	1	1	1	1	1	1	1
sieni	SSfs3	NNFS3----------	NNFS3----------	NNFS3----------	NNFS3----------	NNFS3----------	NNFS3-----A----	NNFS3-----A----	0	1	1	1	1	1	1	1	1	1	1	1	1	1	1	1	1	1	1	1	1	1	1	1	1	1	1	1	1	1	1
na	Eu6	RR--6----------	RR--6-----------	RR--6-----------	RR--6-----------	RR--6-----------	RR--6----------	RR--6----------	0	1	1	1	1	1	1	1	1	1	1	1	1													1	1	1	1	1	1
evanjelickej	AAfs6x	AAFS6----1-----	AAFS6----1-----	AAFS6----1-----	AAFS6----1-----	AAFS6----1-----	AAFS6----1A----	AAFS6----1A----	0	1	1	1	1	1	1	1	1	1	1	1	1	1	1	1	1	1	1	1	1	1	1	1	1	1	1	1	1	1	1
fare	SSfs6	NNFS6----------	NNFS6----------	NNFS6----------	NNFS6----------	NNFS6----------	NNFS6-----A----	NNFS6-----A----	0	1	1	1	1	1	1	1	1	1	1	1	1	1	1	1	1	1	1	1	1	1	1	1	1	1	1	1	1	1	1
Potom	Dx	Db-------1-----	Db-------1-----	Db-------1-----	Db-------1-----	Db-------1-----	Db-------------	Db-------------	0	1	1	1	1	1	1	1	1	1	1	1	1
prišiel	VLdsci+	V-IS---3R-AN---	V-IS---3R-AN---	V-IS---3R-AN---	V-IS---3R-AN---	V-IS---3R-AN---	VpYS---XR-AA---	VpYS---XR-AA---	0	1	1	1	1	1	1							1	1	1	1	0	0	1	1	1	1	1	1							1	1	1	1	0	0	1	1	1	1
koniec	SSis1	NNIS1----------	NNIS1----------	NNIS1----------	NNIS1----------	NNIS1----------	NNIS1-----A----	NNIS1-----A----	0	1	1	1	1	1	1	1	1	1	1	1	1	1	1	1	1	1	1	1	1	1	1	1	1	1	1	1	1	1	1
vojny	SSfs2	NNFS2----------	NNFS2----------	NNFS2----------	NNFS2----------	NNFS2----------	NNFS2-----A----	NNFS2-----A----	0	1	1	1	1	1	1	1	1	1	1	1	1	1	1	1	1	1	1	1	1	1	1	1	1	1	1	1	1	1	1
bolo	VLescn+	V-NX---3R-AA---	V-NX---3R-AA---	V-NX---3R-AA---	V-NX---3R-AA---	V-NX---3R-AA---	VpNS---XR-AA---	VpNS---XR-AA---	0	1	1	1	1	1	1							1	1	1	1	1	1	1	1	1	1	0	0							1	1	1	1	0	0	1	1	1	1
obnovené	Gtns1x	V-NX---3R-AA---	V-NX---3R-AA---	V-NX---3R-AA---	V-NX---3R-AA---	V-NX---3R-AA---	VsNS---XX-AP---	VsNS---XX-AP---	0	1	1	1	1	1	1							1	1	1	1	1	1	1	1	1	1	0	0							1	1	1	1	0	0	1	1	1	1
Československo	SSns1:r	NNNS1----------	NNNS1----------	NNNS1----------	NNNS1----------	NNNS1----------	NNNS1-----A----	NNNS1-----A----	0	1	1	1	1	1	1	1	1	1	1	1	1	1	1	1	1	1	1	1	1	1	1	1	1	1	1	1	1	1	1
začali	VLdpci+	V-IP---3R-AN---	V-IP---3R-AN---	V-IP---3R-AN---	V-IP---3R-AN---	V-IP---3R-AN---	VpXP---XR-AA---	VpXP---XR-AA---	0	1	1	1	1	1	1							1	1	1	1	0	0	1	1	1	1	1	1							1	1	1	1	0	0	1	1	1	1
sa	R	V-IP---3R-AN---	V-IP---3R-AN---	V-IP---3R-AN---	V-IP---3R-AN---	V-IP---3R-AN---	P7-X4----------	P7-X4----------	0	1	1	1	1	0	0							1	1	1	1			1	1	1	1	0	0							1	1	1	1			1	1	1	1
celkom	Dx	Db-------1-----	Db-------1-----	TT-------------	Db-------1-----	Db-------1-----	Db-------------	Db-------------	0	1	0	1	1	1	1	1	0	1	1	1	1
iné	PAip1	P4IP1----------	P4IP1----------	P4IP4----------	P4IP1----------	P4IP1----------	AAIP1----1A----	AAIP1----1A----	0	1	1	1	1	0	0	1	1	1	1	0	0	1	1	1	1	1	1	1	1	1	1	1	1	1	0	1	1	1	1
pomery	SSip1	NNIP1----------	NNIP1----------	NNIP4----------	NNIP1----------	NNIP1----------	NNIP1-----A----	NNIP1-----A----	0	1	1	1	1	1	1	1	1	1	1	1	1	1	1	1	1	1	1	1	1	1	1	1	1	1	0	1	1	1	1
Činnosť	SSfs4	NNFS4----------	NNFS4----------	NNFS1----------	NNFS1----------	NNFS4----------	NNFS1-----A----	NNFS1-----A----	0	1	1	1	1	1	1	1	1	1	1	1	1	1	1	1	1	1	1	1	1	1	1	1	1	1	0	0	1	0	0
nášho	PFns2	PDNS2----------	PDNS2----------	PDNS2----------	PDNS2----------	PDNS2----------	PSIS2-P1-------	PSIS2-P1-------	0	1	1	1	1	1	1	1	1	1	1	0	0	1	1	1	1	0	0	1	1	1	1	1	1	1	1	1	1	1	1
združenia	SSns2	NNNS2----------	NNNS2----------	NNNS2----------	NNNS2----------	NNNS2----------	NNNS2-----A----	NNNS2-----A----	0	1	1	1	1	1	1	1	1	1	1	1	1	1	1	1	1	1	1	1	1	1	1	1	1	1	1	1	1	1	1
zatisli	VLdpcf+	V-FP---3R-AN---	V-FP---3R-AN---	V-FP---3R-AN---	V-FP---3R-AN---	V-FP---3R-AN---	VpXP---XR-AA---	VpXP---XR-AA---	0	1	1	1	1	1	1							1	1	1	1	0	0	1	1	1	1	1	1							1	1	1	1	0	0	1	1	1	1
do	Eu2	RR--2----------	RR--2-----------	RR--2-----------	RR--2-----------	RR--2-----------	RR--2----------	RR--2----------	0	1	1	1	1	1	1	1	1	1	1	1	1													1	1	1	1	1	1
pozadia	SSns2	NNNS2----------	NNNS2----------	NNNS2----------	NNNS2----------	NNNS2----------	NNNS2-----A----	NNNS2-----A----	0	1	1	1	1	1	1	1	1	1	1	1	1	1	1	1	1	1	1	1	1	1	1	1	1	1	1	1	1	1	1
iné	PAfp1	P4FP1----------	P4FP1----------	P4FP4----------	P4FP1----------	P4FP1----------	AAFP4----1A----	AAFP4----1A----	0	1	1	1	1	0	0	1	1	1	1	0	0	1	1	1	1	1	1	1	1	1	1	1	1	1	0	1	1	0	0
potreby	SSfp1	NNFP1----------	NNFP1----------	NNFP4----------	NNFP1----------	NNFP1----------	NNFP4-----A----	NNFP4-----A----	0	1	1	1	1	1	1	1	1	1	1	1	1	1	1	1	1	1	1	1	1	1	1	1	1	1	0	1	1	0	0
To	PFns1	PDNS1----------	PDNS1----------	PDNS1----------	PDNS1----------	PDNS1----------	PDNS1----------	PDNS1----------	0	1	1	1	1	1	1	1	1	1	1	1	1	1	1	1	1	1	1	1	1	1	1	1	1	1	1	1	1	1	1
sa	R	PDNS1----------	PDNS1----------	PDNS1----------	PDNS1----------	PDNS1----------	P7-X4----------	P7-X4----------	0	1	1	1	1	1	1	1	1	1	1	0	0	1	1	1	1			1	1	1	1	0	0	1	1	1	1	0	0
menuje	VKjsc+	VB-S---3P-A----	V--S---3P-A----	V--S---3P-A----	V--S---3P-AA---	V--S---3P-A----	VB-S---3P-AA---	VB-S---3P-AA---	0	1	1	1	1	1	1					1	1							1	1	1	1	1	1							1	1	1	1	1	1	1	1	1	1
iniciatívnosť	SSfs1	NNFS1----------	NNFS1----------	NNFS1----------	NNFS1----------	NNFS1----------	NNFS1-----A----	NNFS1-----A----	0	1	1	1	1	1	1	1	1	1	1	1	1	1	1	1	1	1	1	1	1	1	1	1	1	1	1	1	1	1	1
a	O	J^-------------	J^-------------	J^-------------	J^-------------	J^-------------	J^-------------	J^-------------	0	1	1	1	1	1	1	1	1	1	1	1	1
innovatívnosť	SSfs1	NNFS1----------	NNFS1----------	NNFS1----------	NNFS1----------	NNFS1----------	Db-------------	X@-------------	0	1	1	1	1	0	0	1	1	1	1	0	0	1	1	1	1			1	1	1	1			1	1	1	1
Ľubomír	SSms1:r	NNMS1----------	NNMS1----------	NNMS1----------	NNMS1----------	NNMS1----------	NNMS1-----A----	NNMS1-----A----	0	1	1	1	1	1	1	1	1	1	1	1	1	1	1	1	1	1	1	1	1	1	1	1	1	1	1	1	1	1	1
Ďurovič	SSms1:r	NNMS1----------	NNMS1----------	NNMS1----------	NNMS1----------	NNMS1----------	NNMS1-----A----	X@-------------	0	1	1	1	1	1	0	1	1	1	1	1	0	1	1	1	1	1		1	1	1	1	1		1	1	1	1	1
ODCHODY	SSip1	NNIP1----------	NNIP4----------	NNIP1----------	NNIP1----------	NNIP1----------	NNIP1-----A----	NNIP1-----A----	0	1	1	1	1	1	1	1	1	1	1	1	1	1	1	1	1	1	1	1	1	1	1	1	1	0	1	1	1	1	1
A	O	J^-------------	J^-------------	J^-------------	J^-------------	J^-------------	J^-------------	J^-------------	0	1	1	1	1	1	1	1	1	1	1	1	1
návraty	SSip1	NNIP1----------	NNIP4----------	NNIP1----------	NNIP1----------	NNIP1----------	NNIP1-----A----	NNIP1-----A----	0	1	1	1	1	1	1	1	1	1	1	1	1	1	1	1	1	1	1	1	1	1	1	1	1	0	1	1	1	1	1
ĽUBOMÍRA	SSms2:r	NNMS2----------	NNMS2----------	NNMS2----------	NNMS2----------	NNMS2----------	NNMS2-----A----	NNMS2-----A----	0	1	1	1	1	1	1	1	1	1	1	1	1	1	1	1	1	1	1	1	1	1	1	1	1	1	1	1	1	1	1
Ďuroviča	SSms2:r	NNMS2----------	NNMS2----------	NNMS2----------	NNMS2----------	NNMS2----------	NNMS2-----A----	X@-------------	0	1	1	1	1	1	0	1	1	1	1	1	0	1	1	1	1	1		1	1	1	1	1		1	1	1	1	1
Nebyť	VIe-	Vf--------NA---	Vf--------NA---	Vf--------NA---	Vf--------NA---	Vf--------NA---	Vf--------N----	Vf--------N----	0	1	1	1	1	1	1	1	1	1	1	1	1
toho	PFns2	PDNS2----------	PDNS2----------	PDNS2----------	PDNS2----------	PDNS2----------	PDIS2----------	PDIS2----------	0	1	1	1	1	1	1	1	1	1	1	1	1	1	1	1	1	0	0	1	1	1	1	1	1	1	1	1	1	1	1
Slovensko	SSns1:r	NNNS1----------	NNNS1----------	NNNS1----------	NNNS1----------	NNNS1----------	NNNS1-----A----	NNNS1-----A----	0	1	1	1	1	1	1	1	1	1	1	1	1	1	1	1	1	1	1	1	1	1	1	1	1	1	1	1	1	1	1
by	Y	NNNS1----------	NNNS1----------	NNNS1----------	NNNS1----------	NNNS1----------	Vc-------------	Vc-------------	0	1	1	1	1	0	0	1	1	1	1	0	0	1	1	1	1			1	1	1	1			1	1	1	1
dnes	Dx	Db-------1-----	Db-------1-----	Db-------1-----	Db-------1-----	Db-------1-----	Db-------------	Db-------------	0	1	1	1	1	1	1	1	1	1	1	1	1
neexistovalo	VLescn+	V-NX---3R-AA---	V-NX---3R-NA---	V-NX---3R-NA---	V-NX---3R-NA---	V-NX---3R-NA---	VpNS---XR-NA---	VpNS---XR-NA---	0	1	1	1	1	1	1							1	1	1	1	1	1	1	1	1	1	0	0							1	1	1	1	0	0	1	1	1	1
hovorí	VKesc+	VB-S---3P-AA---	V--S---3P-AA---	V--S---3P-AA---	V--S---3P-AA---	V--S---3P-AA---	VB-S---3P-AA---	VB-S---3P-AA---	0	1	1	1	1	1	1					1	1							1	1	1	1	1	1							1	1	1	1	1	1	1	1	1	1
Ľubomír	SSms1:r	NNMS1----------	NNMS1----------	NNMS1----------	NNMS1----------	NNMS1----------	NNMS1-----A----	NNMS1-----A----	0	1	1	1	1	1	1	1	1	1	1	1	1	1	1	1	1	1	1	1	1	1	1	1	1	1	1	1	1	1	1
Ďurovič	SSms1:r	NNMS1----------	NNMS1----------	NNMS1----------	NNMS1----------	NNMS1----------	NNMS1-----A----	X@-------------	0	1	1	1	1	1	0	1	1	1	1	1	0	1	1	1	1	1		1	1	1	1	1		1	1	1	1	1
To	PFns1	PDNS1----------	PDNS1----------	PDNS1----------	PDNS1----------	PDNS1----------	PDNS1----------	PDNS1----------	0	1	1	1	1	1	1	1	1	1	1	1	1	1	1	1	1	1	1	1	1	1	1	1	1	1	1	1	1	1	1
je	VKesc+	VB-S---3P-AA---	V--S---3P-AA---	V--S---3P-AA---	V--S---3P-AA---	V--S---3P-AA---	VB-S---3P-AA---	VB-S---3P-AA---	0	1	1	1	1	1	1					1	1							1	1	1	1	1	1							1	1	1	1	1	1	1	1	1	1
MOŽNO	T	TT-------------	TT-------------	TT-------------	TT-------------	TT-------------	TT--------------	TT--------------	0	1	1	1	1	1	1	1	1	1	1	1	1
tá	PFfs1	PDFS1----------	PDFS1----------	PDFS1----------	PDFS1----------	PDFS1----------	PDFS1----------	PDFS1----------	0	1	1	1	1	1	1	1	1	1	1	1	1	1	1	1	1	1	1	1	1	1	1	1	1	1	1	1	1	1	1
pozitívna	AAfs1x	AAFS1----1-----	AAFS1----1-----	AAFS1----1-----	AAFS1----1-----	AAFS1----1-----	AAFS1----1A----	AAFS1----1A----	0	1	1	1	1	1	1	1	1	1	1	1	1	1	1	1	1	1	1	1	1	1	1	1	1	1	1	1	1	1	1
stránka	SSfs1	NNFS1----------	NNFS1----------	NNFS1----------	NNFS1----------	NNFS1----------	NNFS1-----A----	NNFS1-----A----	0	1	1	1	1	1	1	1	1	1	1	1	1	1	1	1	1	1	1	1	1	1	1	1	1	1	1	1	1	1	1
ROZDELENIA	SSns2	NNNS2----------	NNNS2----------	NNNS2----------	NNNS2----------	NNNS2----------	NNNS2-----A----	NNNS2-----A----	0	1	1	1	1	1	1	1	1	1	1	1	1	1	1	1	1	1	1	1	1	1	1	1	1	1	1	1	1	1	1
REPUBLIKY	SSfs2	NNFS2----------	NNFS2----------	NNFS2----------	NNFS2----------	NNFS2----------	NNFS2-----A----	NNFS2-----A----	0	1	1	1	1	1	1	1	1	1	1	1	1	1	1	1	1	1	1	1	1	1	1	1	1	1	1	1	1	1	1
Negatívnych	AAfp2x	AAFP2----1-----	AAFP2----1-----	AAFP2----1-----	AAFP2----1-----	AAFP2----1-----	AAFP2----1A----	AAFP2----1A----	0	1	1	1	1	1	1	1	1	1	1	1	1	1	1	1	1	1	1	1	1	1	1	1	1	1	1	1	1	1	1
stránok	SSfp2	NNFP2----------	NNFP2----------	NNFP2----------	NNFP2----------	NNFP2----------	NNFP2-----A----	NNFP2-----A----	0	1	1	1	1	1	1	1	1	1	1	1	1	1	1	1	1	1	1	1	1	1	1	1	1	1	1	1	1	1	1
je	VKesc+	VB-S---3P-AA---	V--S---3P-AA---	V--S---3P-AA---	V--S---3P-AA---	V--S---3P-AA---	VB-S---3P-AA---	VB-S---3P-AA---	0	1	1	1	1	1	1					1	1							1	1	1	1	1	1							1	1	1	1	1	1	1	1	1	1
množstvo	SSns1	NNNS1----------	NNNS1----------	NNNS1----------	NNNS1----------	NNNS1----------	NNNS1-----A----	NNNS1-----A----	0	1	1	1	1	1	1	1	1	1	1	1	1	1	1	1	1	1	1	1	1	1	1	1	1	1	1	1	1	1	1
Nakoniec	T	TT-------------	TT-------------	Db-------1-----	Db-------1-----	Db-------1-----	Db-------------	Db-------------	0	1	0	0	0	0	0	1	0	0	0	0	0
takisto	PD	PY-------------	TT-------------	PY-------------	PY-------------	PY-------------	Db-------------	Db-------------	0	0	1	1	1	0	0	0	1	1	1	0	0
môže	VKesc+	VB-S---3P-AA---	V--S---3P-AA---	V--S---3P-AA---	V--S---3P-AA---	V--S---3P-AA---	VB-S---3P-AA---	VB-S---3P-AA---	0	1	1	1	1	1	1					1	1							1	1	1	1	1	1							1	1	1	1	1	1	1	1	1	1
aj	T	TT-------------	TT-------------	TT-------------	TT-------------	TT-------------	J^-------------	J^-------------	0	1	1	1	1	0	0	1	1	1	1	0	0
Čech	SSms1:r	NNMS1----------	NNMS1----------	NNMS1----------	NNMS1----------	NNMS1----------	NNMS1-----A----	NNMS1-----A----	0	1	1	1	1	1	1	1	1	1	1	1	1	1	1	1	1	1	1	1	1	1	1	1	1	1	1	1	1	1	1
čítať	VIe+	Vf--------AA---	Vf--------AA---	Vf--------AA---	Vf--------AA---	Vf--------AA---	Vf--------A----	Vf--------A----	0	1	1	1	1	1	1	1	1	1	1	1	1
slovenské	AAfp4x	AAFP4----1-----	AAFP4----1-----	AANS1----1-----	AAFP4----1-----	AANS4----1-----	AANS4----1A----	AANS4----1A----	0	1	1	1	1	1	1	1	1	1	1	1	1	1	0	1	0	0	0	1	0	1	0	0	0	1	0	1	1	1	1
keby	OY	J,-------------	J,-------------	J,-------------	J,-------------	J,-------------	J,-------------	J,-------------	0	1	1	1	1	1	1	1	1	1	1	1	1
chcel	VLescm+	V-MS---3R-AA---	V-MS---3R-AA---	V-MS---3R-AA---	V-MS---3R-AA---	V-MS---3R-AA---	VpYS---XR-AA---	VpYS---XR-AA---	0	1	1	1	1	1	1							1	1	1	1	0	0	1	1	1	1	1	1							1	1	1	1	0	0	1	1	1	1
oni	PFmp1	PDMP1----------	PDMP1----------	PDMP1----------	PDMP1----------	PDMP1----------	PPMP1--3-------	PPMP1--3-------	0	1	1	1	1	1	1	1	1	1	1	0	0	1	1	1	1	1	1	1	1	1	1	1	1	1	1	1	1	1	1
však	O	J^-------------	J^-------------	TT-------------	TT-------------	J^-------------	J^-------------	J^-------------	0	1	0	0	1	1	1	1	0	0	1	1	1
tú	PFfs4	PDFS4----------	PDFS4----------	PDFS4----------	PDFS4----------	PDFS4----------	PDFS4----------	PDFS4----------	0	1	1	1	1	1	1	1	1	1	1	1	1	1	1	1	1	1	1	1	1	1	1	1	1	1	1	1	1	1	1
potrebu	SSfs4	NNFS4----------	NNFS4----------	NNFS4----------	NNFS4----------	NNFS4----------	NNFS4-----A----	NNFS4-----A----	0	1	1	1	1	1	1	1	1	1	1	1	1	1	1	1	1	1	1	1	1	1	1	1	1	1	1	1	1	1	1
V	Eu6	RR--6----------	RR--6-----------	RR--6-----------	RR--6-----------	RR--6-----------	RR--6----------	RR--6----------	0	1	1	1	1	1	1	1	1	1	1	1	1													1	1	1	1	1	1
ROVNAKEJ	AAfs6x	AAFS6----1-----	AAFS6----1-----	AAFS6----1-----	AAFS6----1-----	AAFS6----1-----	AAFS6----1A----	AAFS6----1A----	0	1	1	1	1	1	1	1	1	1	1	1	1	1	1	1	1	1	1	1	1	1	1	1	1	1	1	1	1	1	1
MIERE	SSfs6	NNFS6----------	NNFS6----------	NNFS6----------	NNFS6----------	NNFS6----------	NNFS6-----A----	NNFS6-----A----	0	1	1	1	1	1	1	1	1	1	1	1	1	1	1	1	1	1	1	1	1	1	1	1	1	1	1	1	1	1	1
nemajú	VKepc-	VB-P---3P-NA---	V--P---3P-NA---	V--P---3P-NA---	V--P---3P-NA---	V--P---3P-NA---	VB-P---3P-NA---	VB-P---3P-NA---	0	1	1	1	1	1	1					1	1							1	1	1	1	1	1							1	1	1	1	1	1	1	1	1	1
Konkrétne	Dx	Db-------1-----	Db-------1-----	Db-------1-----	AANS1----1-----	Db-------1-----	Dg-------1A----	Dg-------1A----	0	1	1	0	1	1	1	1	1	0	1	0	0
je	VKesc+	VB-S---3P-AA---	V--S---3P-AA---	V--S---3P-AA---	V--S---3P-AA---	V--S---3P-AA---	VB-S---3P-AA---	VB-S---3P-AA---	0	1	1	1	1	1	1					1	1							1	1	1	1	1	1							1	1	1	1	1	1	1	1	1	1
to	PFns1	PDNS1----------	PDNS1----------	PDNS1----------	PDNS1----------	PDNS1----------	PDNS1----------	PDNS1----------	0	1	1	1	1	1	1	1	1	1	1	1	1	1	1	1	1	1	1	1	1	1	1	1	1	1	1	1	1	1	1
obdobie	SSns1	NNNS1----------	NNNS1----------	NNNS1----------	NNNS1----------	NNNS1----------	NNNS1-----A----	NNNS1-----A----	0	1	1	1	1	1	1	1	1	1	1	1	1	1	1	1	1	1	1	1	1	1	1	1	1	1	1	1	1	1	1
od	Eu2	RR--2----------	RR--2-----------	RR--2-----------	RR--2-----------	RR--2-----------	RR--2----------	RR--2----------	0	1	1	1	1	1	1	1	1	1	1	1	1													1	1	1	1	1	1
roku	SSis2	NNIS2----------	NNIS2----------	NNIS2----------	NNIS2----------	NNIS2----------	NNIS6-----A----	NNIS6-----A----	0	1	1	1	1	1	1	1	1	1	1	1	1	1	1	1	1	1	1	1	1	1	1	1	1	1	1	1	1	0	0
do	Eu2	RR--2----------	RR--2-----------	RR--2-----------	RR--2-----------	RR--2-----------	RR--2----------	RR--2----------	0	1	1	1	1	1	1	1	1	1	1	1	1													1	1	1	1	1	1
roku	SSis2	NNIS2----------	NNIS2----------	NNIS2----------	NNIS2----------	NNIS2----------	NNIS6-----A----	NNIS6-----A----	0	1	1	1	1	1	1	1	1	1	1	1	1	1	1	1	1	1	1	1	1	1	1	1	1	1	1	1	1	0	0
Vtedy	PD	PY-------------	PY-------------	PY-------------	PY-------------	PY-------------	Db-------------	Db-------------	0	1	1	1	1	0	0	1	1	1	1	0	0
sa	R	PY-------------	PY-------------	PY-------------	PY-------------	PY-------------	P7-X4----------	P7-X4----------	0	1	1	1	1	1	1	1	1	1	1	0	0
naraz	Dx	Db-------1-----	Db-------1-----	Db-------1-----	Db-------1-----	Db-------1-----	Db-------------	Db-------------	0	1	1	1	1	1	1	1	1	1	1	1	1
ukázalo	VLdscn+	V-NX---3R-AN---	V-NX---3R-AN---	V-NX---3R-AN---	V-NX---3R-AN---	V-NX---3R-AN---	VpNS---XR-AA---	VpNS---XR-AA---	0	1	1	1	1	1	1							1	1	1	1	1	1	1	1	1	1	0	0							1	1	1	1	0	0	1	1	1	1
že	O	J^-------------	J^-------------	J^-------------	J^-------------	J^-------------	J,-------------	J,-------------	0	1	1	1	1	1	1	1	1	1	1	0	0
komunistická	AAfs1x	AAFS1----1-----	AAFS1----1-----	AAFS1----1-----	AAFS1----1-----	AAFS1----1-----	AAFS1----1A----	AAFS1----1A----	0	1	1	1	1	1	1	1	1	1	1	1	1	1	1	1	1	1	1	1	1	1	1	1	1	1	1	1	1	1	1
strana	SSfs1	NNFS1----------	NNFS1----------	NNFS1----------	NNFS1----------	NNFS1----------	NNFS1-----A----	NNFS1-----A----	0	1	1	1	1	1	1	1	1	1	1	1	1	1	1	1	1	1	1	1	1	1	1	1	1	1	1	1	1	1	1
s	Eu7	RR--7----------	RR--7-----------	RR--7-----------	RR--7-----------	RR--7-----------	RR--7----------	RR--7----------	0	1	1	1	1	1	1	1	1	1	1	1	1													1	1	1	1	1	1
jej	PUip7	PZIP7----------	PZIP7----------	PZIP7----------	PZIP7----------	PZIP7----------	PSXXXFS3-------	PSXXXFS3-------	0	1	1	1	1	1	1	1	1	1	1	0	0	1	1	1	1	0	0	1	1	1	1	0	0	1	1	1	1	0	0
zločineckými	AAip7x	AAIP7----1-----	AAIP7----1-----	AAIP7----1-----	AAIP7----1-----	AAIP7----1-----	AAIP7----1A----	AAIP7----1A----	0	1	1	1	1	1	1	1	1	1	1	1	1	1	1	1	1	1	1	1	1	1	1	1	1	1	1	1	1	1	1
spôsobmi	SSip7	NNIP7----------	NNIP7----------	NNIP7----------	NNIP7----------	NNIP7----------	NNIP7-----A----	NNIP7-----A----	0	1	1	1	1	1	1	1	1	1	1	1	1	1	1	1	1	1	1	1	1	1	1	1	1	1	1	1	1	1	1
skrachovala	VLdscf+	V-FS---3R-AN---	V-FS---3R-AN---	V-FS---3R-AN---	V-FS---3R-AN---	V-FS---3R-AN---	VpFS---XR-AA---	VpFS---XR-AA---	0	1	1	1	1	1	1							1	1	1	1	1	1	1	1	1	1	1	1							1	1	1	1	0	0	1	1	1	1
Vtedy	PD	PY-------------	PY-------------	PY-------------	PY-------------	PY-------------	Db-------------	Db-------------	0	1	1	1	1	0	0	1	1	1	1	0	0
vyšla	VLdscf+	V-FS---3R-AN---	V-FS---3R-AN---	V-FS---3R-AN---	V-FS---3R-AN---	V-FS---3R-AN---	VpFS---XR-AA---	VpFS---XR-AA---	0	1	1	1	1	1	1							1	1	1	1	1	1	1	1	1	1	1	1							1	1	1	1	0	0	1	1	1	1
moja	PFfs1	PDFS1----------	PDFS1----------	PDFS1----------	PDFS1----------	PDFS1----------	PSFS1-S1-------	PSFS1-S1-------	0	1	1	1	1	1	1	1	1	1	1	0	0	1	1	1	1	1	1	1	1	1	1	1	1	1	1	1	1	1	1
KNIHA	SSfs1	NNFS1----------	NNFS1----------	NNFS1----------	NNFS1----------	NNFS1----------	NNFS1-----A----	NNFS1-----A----	0	1	1	1	1	1	1	1	1	1	1	1	1	1	1	1	1	1	1	1	1	1	1	1	1	1	1	1	1	1	1
Paradigmatika	SSfs1	NNFS1----------	NNFS1----------	NNFS1----------	NNFS1----------	NNFS1----------	NNFS1-----A----	X@-------------	0	1	1	1	1	1	0	1	1	1	1	1	0	1	1	1	1	1		1	1	1	1	1		1	1	1	1	1
spisovnej	AAfs2x	AAFS2----1-----	AAFS2----1-----	AAFS2----1-----	AAFS2----1-----	AAFS2----1-----	AAFS2----1A----	AAFS2----1A----	0	1	1	1	1	1	1	1	1	1	1	1	1	1	1	1	1	1	1	1	1	1	1	1	1	1	1	1	1	1	1
ruštiny	SSfs2	NNFS2----------	NNFS2----------	NNFS2----------	NNFS2----------	NNFS2----------	NNFS2-----A----	NNFS2-----A----	0	1	1	1	1	1	1	1	1	1	1	1	1	1	1	1	1	1	1	1	1	1	1	1	1	1	1	1	1	1	1
ktorá	PAfs1	P4FS1----------	P4FS1----------	P4FS1----------	P4FS1----------	P4FS1----------	P4FS1----------	P4FS1----------	0	1	1	1	1	1	1	1	1	1	1	1	1	1	1	1	1	1	1	1	1	1	1	1	1	1	1	1	1	1	1
sa	R	P4FS1----------	P4FS1----------	P4FS1----------	P4FS1----------	P4FS1----------	P7-X4----------	P7-X4----------	0	1	1	1	1	1	1	1	1	1	1	0	0	1	1	1	1			1	1	1	1	0	0	1	1	1	1	0	0
stala	VLdscf+	V-FS---3R-AN---	V-FS---3R-AN---	V-FS---3R-AN---	V-FS---3R-AN---	V-FS---3R-AN---	VpFS---XR-AA---	VpFS---XR-AA---	0	1	1	1	1	1	1							1	1	1	1	1	1	1	1	1	1	1	1							1	1	1	1	0	0	1	1	1	1
celoštátnou	AAfs7x	AAFS7----1-----	AAFS7----1-----	AAFS7----1-----	AAFS7----1-----	AAFS7----1-----	AAFS7----1A----	AAFS7----1A----	0	1	1	1	1	1	1	1	1	1	1	1	1	1	1	1	1	1	1	1	1	1	1	1	1	1	1	1	1	1	1
univerzitnou	AAfs7x	AAFS7----1-----	AAFS7----1-----	AAFS7----1-----	AAFS7----1-----	AAFS7----1-----	AAFS7----1A----	AAFS7----1A----	0	1	1	1	1	1	1	1	1	1	1	1	1	1	1	1	1	1	1	1	1	1	1	1	1	1	1	1	1	1	1
učebnicou	SSfs7	NNFS7----------	NNFS7----------	NNFS7----------	NNFS7----------	NNFS7----------	NNFS7-----A----	NNFS7-----A----	0	1	1	1	1	1	1	1	1	1	1	1	1	1	1	1	1	1	1	1	1	1	1	1	1	1	1	1	1	1	1
ruskej	AAfs2x	AAFS2----1-----	AAFS2----1-----	AAFS2----1-----	AAFS2----1-----	AAFS2----1-----	AAFS2----1A----	AAFS2----1A----	0	1	1	1	1	1	1	1	1	1	1	1	1	1	1	1	1	1	1	1	1	1	1	1	1	1	1	1	1	1	1
TEORETICKEJ	AAfs2x	AAFS2----1-----	AAFS2----1-----	AAFS2----1-----	AAFS2----1-----	AAFS2----1-----	AAFS2----1A----	AAFS2----1A----	0	1	1	1	1	1	1	1	1	1	1	1	1	1	1	1	1	1	1	1	1	1	1	1	1	1	1	1	1	1	1
morfológie	SSfs2	NNFS2----------	NNFS2----------	NNFS2----------	NNFS2----------	NNFS2----------	NNFS2-----A----	NNFS2-----A----	0	1	1	1	1	1	1	1	1	1	1	1	1	1	1	1	1	1	1	1	1	1	1	1	1	1	1	1	1	1	1
Uvedomovali	VLepah+	V-HP---1R-AA---	V-HP---1R-AA---	V-HP---1R-AA---	V-HP---1R-AA---	V-HP---1R-AA---	VpXP---XR-AA---	VpXP---XR-AA---	0	1	1	1	1	1	1							1	1	1	1	0	0	1	1	1	1	1	1							1	1	1	1	0	0	1	1	1	1
sme	VKepa+	VB-P---1P-AA---	V--P---1P-AA---	V--P---1P-AA---	V--P---1P-AA---	V--P---1P-AA---	VB-P---1P-AA---	VB-P---1P-AA---	0	1	1	1	1	1	1					1	1							1	1	1	1	1	1							1	1	1	1	1	1	1	1	1	1
si	R	VB-P---1P-AA---	V--P---1P-AA---	V--P---1P-AA---	V--P---1P-AA---	V--P---1P-AA---	P7-X3----------	P7-X3----------	0	1	1	1	1	0	0					0	0							1	1	1	1	0	0							1	1	1	1			1	1	1	1
že	O	J^-------------	J^-------------	J^-------------	J^-------------	J^-------------	J,-------------	J,-------------	0	1	1	1	1	1	1	1	1	1	1	0	0
sa	R	J^-------------	J^-------------	J^-------------	Z:------------	J^-------------	P7-X4----------	P7-X4----------	0	1	1	0	1	0	0	1	1	0	1	0	0
môže	VKesc+	VB-S---3P-AA---	V--S---3P-AA---	V--S---3P-AA---	V--S---3P-AA---	V--S---3P-AA---	VB-S---3P-AA---	VB-S---3P-AA---	0	1	1	1	1	1	1					1	1							1	1	1	1	1	1							1	1	1	1	1	1	1	1	1	1
Dovtedy	PD	PY-------------	PY-------------	PY-------------	PY-------------	PY-------------	Db-------------	Db-------------	0	1	1	1	1	0	0	1	1	1	1	0	0
to	PFns1	PDNS1----------	PDNS1----------	PDNS1----------	PDNS1----------	PDNS1----------	PDNS1----------	PDNS1----------	0	1	1	1	1	1	1	1	1	1	1	1	1	1	1	1	1	1	1	1	1	1	1	1	1	1	1	1	1	1	1
však	T	TT-------------	TT-------------	TT-------------	TT-------------	J^-------------	J^-------------	J^-------------	0	1	1	1	0	0	0	1	1	1	0	0	0
bolo	VLescn+	V-NX---3R-AA---	V-NX---3R-AA---	V-NX---3R-AA---	V-NX---3R-AA---	V-NX---3R-AA---	VpNS---XR-AA---	VpNS---XR-AA---	0	1	1	1	1	1	1							1	1	1	1	1	1	1	1	1	1	0	0							1	1	1	1	0	0	1	1	1	1
obdobie	SSns1	NNNS1----------	NNNS1----------	NNNS1----------	NNNS1----------	NNNS1----------	NNNS1-----A----	NNNS1-----A----	0	1	1	1	1	1	1	1	1	1	1	1	1	1	1	1	1	1	1	1	1	1	1	1	1	1	1	1	1	1	1
veľkej	AAfs2x	AAFS2----1-----	AAFS2----1-----	AAFS2----1-----	AAFS2----1-----	AAFS2----1-----	AAFS2----1A----	AAFS2----1A----	0	1	1	1	1	1	1	1	1	1	1	1	1	1	1	1	1	1	1	1	1	1	1	1	1	1	1	1	1	1	1
nádeje	SSfs2	NNFS2----------	NNFS2----------	NNFS2----------	NNFS2----------	NNFS2----------	NNFS2-----A----	NNFS2-----A----	0	1	1	1	1	1	1	1	1	1	1	1	1	1	1	1	1	1	1	1	1	1	1	1	1	1	1	1	1	1	1
Ja	PPhs1	PPxS1----------	PPxS1----------	PPxS1----------	PPxS1----------	PPxS1----------	PP-S1--1-------	PP-S1--1-------	0	1	1	1	1	1	1	1	1	1	1	1	1	1	1	1	1			1	1	1	1	1	1	1	1	1	1	1	1
ich	PFmp4	PDMP4----------	PDFP4----------	PDIP4----------	PDMP4----------	PDMP4----------	PPMP4--3-------	PPMP4--3-------	0	1	1	1	1	1	1	1	1	1	1	0	0	0	0	1	1	1	1	1	1	1	1	1	1	1	1	1	1	1	1
poznám	VKesa+	VB-S---1P-AA---	V--S---1P-AA---	V--S---1P-A----	V--S---1P-AA---	V--S---1P-AA---	VB-S---1P-AA---	VB-S---1P-AA---	0	1	1	1	1	1	1					1	1							1	1	1	1	1	1							1	1	1	1	1	1	1	1	1	1
A	O	J^-------------	J^-------------	J^-------------	J^-------------	J^-------------	J^-------------	J^-------------	0	1	1	1	1	1	1	1	1	1	1	1	1
mal	VLescm+	V-MS---3R-AA---	V-MS---3R-AA---	V-MS---3R-AA---	V-MS---3R-AA---	V-MS---3R-AA---	VpYS---XR-AA---	VpYS---XR-AA---	0	1	1	1	1	1	1							1	1	1	1	0	0	1	1	1	1	1	1							1	1	1	1	0	0	1	1	1	1
pravdu	SSfs4	NNFS4----------	NNFS4----------	NNFS4----------	NNFS4----------	NNFS4----------	NNFS4-----A----	NNFS4-----A----	0	1	1	1	1	1	1	1	1	1	1	1	1	1	1	1	1	1	1	1	1	1	1	1	1	1	1	1	1	1	1
Sklamanie	SSns1	NNNS1----------	NNNS4----------	NNNS1----------	NNNS1----------	NNNS1----------	NNNS1-----A----	NNNS1-----A----	0	1	1	1	1	1	1	1	1	1	1	1	1	1	1	1	1	1	1	1	1	1	1	1	1	0	1	1	1	1	1
po	Eu6	RR--6----------	RR--6-----------	RR--6-----------	RR--6-----------	RR--6-----------	RR--6----------	RR--6----------	0	1	1	1	1	1	1	1	1	1	1	1	1													1	1	1	1	1	1
vojne	SSfs6	NNFS6----------	NNFS6----------	NNFS6----------	NNFS6----------	NNFS6----------	NNFS6-----A----	NNFS6-----A----	0	1	1	1	1	1	1	1	1	1	1	1	1	1	1	1	1	1	1	1	1	1	1	1	1	1	1	1	1	1	1
Ľubomír	SSms1:r	NNMS1----------	NNMS1----------	NNMS1----------	NNMS1----------	NNMS1----------	NNMS1-----A----	NNMS1-----A----	0	1	1	1	1	1	1	1	1	1	1	1	1	1	1	1	1	1	1	1	1	1	1	1	1	1	1	1	1	1	1
Ďurovič	SSms1:r	NNMS1----------	NNMS1----------	NNMS1----------	NNMS1----------	NNMS1----------	NNMS1-----A----	X@-------------	0	1	1	1	1	1	0	1	1	1	1	1	0	1	1	1	1	1		1	1	1	1	1		1	1	1	1	1
do	Eu2	RR--2----------	RR--2-----------	RR--2-----------	RR--2-----------	RR--2-----------	RR--2----------	RR--2----------	0	1	1	1	1	1	1	1	1	1	1	1	1													1	1	1	1	1	1
komunistickej	AAfs2x	AAFS2----1-----	AAFS2----1-----	AAFS2----1-----	AAFS2----1-----	AAFS2----1-----	AAFS2----1A----	AAFS2----1A----	0	1	1	1	1	1	1	1	1	1	1	1	1	1	1	1	1	1	1	1	1	1	1	1	1	1	1	1	1	1	1
strany	SSfs2	NNFS2----------	NNFS2----------	NNFS2----------	NNFS2----------	NNFS2----------	NNFS2-----A----	NNFS2-----A----	0	1	1	1	1	1	1	1	1	1	1	1	1	1	1	1	1	1	1	1	1	1	1	1	1	1	1	1	1	1	1
nevstúpil	VLdscm-	V-MS---3R-NN---	V-MS---3R-NN---	V-MS---3R-NN---	V-MS---3R-NN---	V-MS---3R-NN---	VpYS---XR-NA---	VpYS---XR-NA---	0	1	1	1	1	1	1							1	1	1	1	0	0	1	1	1	1	1	1							1	1	1	1	0	0	1	1	1	1
Piateho	AAis2x	AAIS2----1-----	CxIS2----------	CxIS2----------	AAIS2----1-----	AAIS2----1-----	CrIS2----------	CrIS2----------	0	0	0	1	1	0	0	0	0	1	1	0	0	1	1	1	1	1	1	1	1	1	1	1	1	1	1	1	1	1	1
mája	SSis2	NNIS2----------	NNIS2----------	NNIS2----------	NNIS2----------	NNIS2----------	NNIS2-----A----	NNIS2-----A----	0	1	1	1	1	1	1	1	1	1	1	1	1	1	1	1	1	1	1	1	1	1	1	1	1	1	1	1	1	1	1
sa	R	NNIS2----------	NNIS2----------	NNIS2----------	NNIS2----------	NNIS2----------	P7-X4----------	P7-X4----------	0	1	1	1	1	0	0	1	1	1	1	0	0	1	1	1	1			1	1	1	1	0	0	1	1	1	1	0	0
začalo	VLdscn+	V-NX---3R-AN---	V-NX---3R-AN---	V-NX---3R-AN---	V-NX---3R-AN---	V-NX---3R-AN---	VpNS---XR-AA---	VpNS---XR-AA---	0	1	1	1	1	1	1							1	1	1	1	1	1	1	1	1	1	0	0							1	1	1	1	0	0	1	1	1	1
Pražské	AAns1x	AANS1----1-----	AANS1----1-----	AANS1----1-----	AANS1----1-----	AANS1----1-----	AANS1----1A----	AANS1----1A----	0	1	1	1	1	1	1	1	1	1	1	1	1	1	1	1	1	1	1	1	1	1	1	1	1	1	1	1	1	1	1
povstanie	SSns1	NNNS1----------	NNNS1----------	NNNS1----------	NNNS1----------	NNNS1----------	NNNS1-----A----	NNNS1-----A----	0	1	1	1	1	1	1	1	1	1	1	1	1	1	1	1	1	1	1	1	1	1	1	1	1	1	1	1	1	1	1
a	O	J^-------------	J^-------------	J^-------------	J^-------------	J^-------------	J^-------------	J^-------------	0	1	1	1	1	1	1	1	1	1	1	1	1
z	Eu2	RR--2----------	RR--2-----------	RR--2-----------	RR--2-----------	RR--2-----------	RR--2----------	RR--2----------	0	1	1	1	1	1	1	1	1	1	1	1	1													1	1	1	1	1	1
rádia	SSns2	NNNS2----------	NNNS2----------	NNNS2----------	NNNS2----------	NNNS2----------	NNNS2-----A----	NNNS2-----A----	0	1	1	1	1	1	1	1	1	1	1	1	1	1	1	1	1	1	1	1	1	1	1	1	1	1	1	1	1	1	1
sa	R	NNNS2----------	NNNS2----------	NNNS2----------	NNNS2----------	NNNS2----------	P7-X4----------	P7-X4----------	0	1	1	1	1	0	0	1	1	1	1	0	0	1	1	1	1			1	1	1	1	0	0	1	1	1	1	0	0
ozývala	VLescf+	V-FS---3R-AA---	V-FS---3R-AA---	V-FS---3R-AA---	V-FS---3R-AA---	V-FS---3R-AA---	VpFS---XR-AA---	VpFS---XR-AA---	0	1	1	1	1	1	1							1	1	1	1	1	1	1	1	1	1	1	1							1	1	1	1	0	0	1	1	1	1
výzva	SSfs1	NNFS1----------	NNFS1----------	NNFS1----------	NNFS1----------	NNFS1----------	NNFS1-----A----	NNFS1-----A----	0	1	1	1	1	1	1	1	1	1	1	1	1	1	1	1	1	1	1	1	1	1	1	1	1	1	1	1	1	1	1
o	Eu4	RR--4----------	RR--4-----------	RR--4-----------	RR--4-----------	RR--4-----------	RR--4----------	RR--4----------	0	1	1	1	1	1	1	1	1	1	1	1	1													1	1	1	1	1	1
pomoc	SSfs4	NNFS4----------	NNFS4----------	NNFS4----------	NNFS4----------	NNFS4----------	NNFS4-----A----	NNFS4-----A----	0	1	1	1	1	1	1	1	1	1	1	1	1	1	1	1	1	1	1	1	1	1	1	1	1	1	1	1	1	1	1
To	PFns1	PDNS1----------	PDNS1----------	PDNS1----------	PDNS1----------	PDNS1----------	PDNS1----------	PDNS1----------	0	1	1	1	1	1	1	1	1	1	1	1	1	1	1	1	1	1	1	1	1	1	1	1	1	1	1	1	1	1	1
bola	VLescf+	V-FS---3R-AA---	V-FS---3R-AA---	V-FS---3R-AA---	V-FS---3R-AA---	V-FS---3R-AA---	VpFS---XR-AA---	VpFS---XR-AA---	0	1	1	1	1	1	1							1	1	1	1	1	1	1	1	1	1	1	1							1	1	1	1	0	0	1	1	1	1
tá	PFfs1	PDFS1----------	PDFS1----------	PDFS1----------	PDFS1----------	PDFS1----------	PDFS1----------	PDFS1----------	0	1	1	1	1	1	1	1	1	1	1	1	1	1	1	1	1	1	1	1	1	1	1	1	1	1	1	1	1	1	1
zločinecká	AAfs1x	AAFS1----1-----	AAFS1----1-----	AAFS1----1-----	AAFS1----1-----	AAFS1----1-----	AAFS1----1A----	AAFS1----1A----	0	1	1	1	1	1	1	1	1	1	1	1	1	1	1	1	1	1	1	1	1	1	1	1	1	1	1	1	1	1	1
časť	SSfs1	NNFS1----------	NNFS1----------	NNFS1----------	NNFS1----------	NNFS1----------	NNFS1-----A----	NNFS1-----A----	0	1	1	1	1	1	1	1	1	1	1	1	1	1	1	1	1	1	1	1	1	1	1	1	1	1	1	1	1	1	1
komunistickej	AAfs2x	AAFS2----1-----	AAFS2----1-----	AAFS2----1-----	AAFS2----1-----	AAFS2----1-----	AAFS2----1A----	AAFS2----1A----	0	1	1	1	1	1	1	1	1	1	1	1	1	1	1	1	1	1	1	1	1	1	1	1	1	1	1	1	1	1	1
strany	SSfs2	NNFS2----------	NNFS2----------	NNFS2----------	NNFS2----------	NNFS2----------	NNFS2-----A----	NNFS2-----A----	0	1	1	1	1	1	1	1	1	1	1	1	1	1	1	1	1	1	1	1	1	1	1	1	1	1	1	1	1	1	1
Môj	PFms1	PDMS1----------	PDMS1----------	PDMS1----------	PDMS1----------	PDMS1----------	PSMS1-S1-------	PSMS1-S1-------	0	1	1	1	1	1	1	1	1	1	1	0	0	1	1	1	1	1	1	1	1	1	1	1	1	1	1	1	1	1	1
otec	SSms1	NNMS1----------	NNMS1----------	NNMS1----------	NNMS1----------	NNMS1----------	NNMS1-----A----	NNMS1-----A----	0	1	1	1	1	1	1	1	1	1	1	1	1	1	1	1	1	1	1	1	1	1	1	1	1	1	1	1	1	1	1
bol	VLescm+	V-MS---3R-AA---	V-MS---3R-AA---	V-MS---3R-AA---	V-MS---3R-AA---	V-MS---3R-AA---	VpYS---XR-AA---	VpYS---XR-AA---	0	1	1	1	1	1	1							1	1	1	1	0	0	1	1	1	1	1	1							1	1	1	1	0	0	1	1	1	1
selfmademan	SSms1	NNMS1----------	NNMS1----------	NNMS1----------	NNMS1----------	NNMS1----------	NNMS1-----A----	NNMS1-----A----	0	1	1	1	1	1	1	1	1	1	1	1	1	1	1	1	1	1	1	1	1	1	1	1	1	1	1	1	1	1	1
Nedávno	Dx	Db-------1-----	Db-------1-----	Db-------1-----	Db-------1-----	Db-------1-----	Dg-------1N----	Dg-------1N----	0	1	1	1	1	1	1	1	1	1	1	0	0
som	VKesa+	VB-S---1P-AA---	V--S---1P-AA---	V--S---1P-AA---	V--S---1P-AA---	V--S---1P-AA---	VB-S---1P-AA---	VB-S---1P-AA---	0	1	1	1	1	1	1					1	1							1	1	1	1	1	1							1	1	1	1	1	1	1	1	1	1
odovzdal	VLdsam+	V-MS---1R-AN---	V-MS---1R-AN---	V-MS---1R-AN---	V-MS---1R-AN---	V-MS---1R-AN---	VpYS---XR-AA---	VpYS---XR-AA---	0	1	1	1	1	1	1							1	1	1	1	0	0	1	1	1	1	1	1							1	1	1	1	0	0	1	1	1	1
do	Eu2	RR--2----------	RR--2-----------	RR--2-----------	RR--2-----------	RR--2-----------	RR--2----------	RR--2----------	0	1	1	1	1	1	1	1	1	1	1	1	1													1	1	1	1	1	1
skalického	AAns2x	AANS2----1-----	AANS2----1-----	AANS2----1-----	AANS2----1-----	AANS2----1-----	AANS2----1A----	AANS2----1A----	0	1	1	1	1	1	1	1	1	1	1	1	1	1	1	1	1	1	1	1	1	1	1	1	1	1	1	1	1	1	1
Záhorského	AAns2x:r	AANS2----1-----	AANS2----1-----	AANS2----1-----	AANS2----1-----	AANS2----1-----	AANS2----1A----	AANS2----1A----	0	1	1	1	1	1	1	1	1	1	1	1	1	1	1	1	1	1	1	1	1	1	1	1	1	1	1	1	1	1	1
múzea	SSns2	NNNS2----------	NNNS2----------	NNNS2----------	NNNS2----------	NNNS2----------	NNNS2-----A----	NNNS2-----A----	0	1	1	1	1	1	1	1	1	1	1	1	1	1	1	1	1	1	1	1	1	1	1	1	1	1	1	1	1	1	1
otcove	AFip4x	AUIP4----1-----	AUIP4----1-----	AUIP4----1-----	AAIP4----1-----	AUIP4----1-----	AUIP1M---------	AUIP1M---------	0	1	1	1	1	1	1	1	1	0	1	1	1	1	1	1	1	1	1	1	1	1	1	1	1	1	1	1	1	0	0
denníky	SSip4	NNIP4----------	NNIP4----------	NNIP4----------	NNIP4----------	NNIP4----------	NNIP1-----A----	NNIP1-----A----	0	1	1	1	1	1	1	1	1	1	1	1	1	1	1	1	1	1	1	1	1	1	1	1	1	1	1	1	1	0	0
Je	VKesc+	VB-S---3P-AA---	V--S---3P-AA---	V--S---3P-AA---	V--S---3P-AA---	V--S---3P-AA---	VB-S---3P-AA---	VB-S---3P-AA---	0	1	1	1	1	1	1					1	1							1	1	1	1	1	1							1	1	1	1	1	1	1	1	1	1
to	PFns1	PDNS1----------	PDNS1----------	PDNS1----------	PDNS1----------	PDNS1----------	PDNS1----------	PDNS1----------	0	1	1	1	1	1	1	1	1	1	1	1	1	1	1	1	1	1	1	1	1	1	1	1	1	1	1	1	1	1	1
cenná	AAfs1x	AAFS1----1-----	AAFS1----1-----	AAFS1----1-----	AAFS1----1-----	AAFS1----1-----	AAFS1----1A----	AAFS1----1A----	0	1	1	1	1	1	1	1	1	1	1	1	1	1	1	1	1	1	1	1	1	1	1	1	1	1	1	1	1	1	1
a	O	J^-------------	J^-------------	J^-------------	J^-------------	J^-------------	J^-------------	J^-------------	0	1	1	1	1	1	1	1	1	1	1	1	1
zaujímavá	AAfs1x	AAFS1----1-----	AAFS1----1-----	AAFS1----1-----	AAFS1----1-----	AAFS1----1-----	AAFS1----1A----	AAFS1----1A----	0	1	1	1	1	1	1	1	1	1	1	1	1	1	1	1	1	1	1	1	1	1	1	1	1	1	1	1	1	1	1
pamiatka	SSfs1	NNFS1----------	NNFS1----------	NNFS1----------	NNFS1----------	NNFS1----------	NNFS1-----A----	NNFS1-----A----	0	1	1	1	1	1	1	1	1	1	1	1	1	1	1	1	1	1	1	1	1	1	1	1	1	1	1	1	1	1	1
o	Eu6	RR--6----------	RR--6-----------	RR--6-----------	RR--6-----------	RR--6-----------	RR--4----------	RR--4----------	0	1	1	1	1	1	1	1	1	1	1	1	1													1	1	1	1	0	0
storočí	SSns6	NNNS6----------	NNNP2----------	NNNS6----------	NNNS6----------	NNNS6----------	NNNS6-----A----	NNNS6-----A----	0	1	1	1	1	1	1	1	1	1	1	1	1	1	1	1	1	1	1	0	1	1	1	1	1	0	1	1	1	1	1
Polovicu	SSfs4	NNFS4----------	NNFS4----------	NNFS4----------	NNFS4----------	NNFS4----------	NNFS4-----A----	NNFS4-----A----	0	1	1	1	1	1	1	1	1	1	1	1	1	1	1	1	1	1	1	1	1	1	1	1	1	1	1	1	1	1	1
zo	Ev2	RV--2----------	RV--2-----------	RV--2-----------	RV--2-----------	RV--2-----------	RV--2----------	RV--2----------	0	1	1	1	1	1	1	1	1	1	1	1	1													1	1	1	1	1	1
všetkého	PFns2	PDNS2----------	PDNS2----------	PDNS2----------	PDNS2----------	PDNS2----------	PLIS2----------	PLIS2----------	0	1	1	1	1	1	1	1	1	1	1	0	0	1	1	1	1	0	0	1	1	1	1	1	1	1	1	1	1	1	1
čo	PFns1	PDNS1----------	PDNS1----------	PDNS1----------	PDNS1----------	PDNS1----------	PQ--1----------	PQ--1----------	0	1	1	1	1	1	1	1	1	1	1	0	0	1	1	1	1			1	1	1	1			1	1	1	1	1	1
vo	Ev6	RV--6----------	RV--6-----------	RV--6-----------	RV--6-----------	RV--6-----------	RV--6----------	RV--6----------	0	1	1	1	1	1	1	1	1	1	1	1	1													1	1	1	1	1	1
mne	PPhs3	PPxS3----------	PPxS6----------	PPxS3----------	PPxS6----------	PPxS6----------	PP-S6--1-------	PP-S6--1-------	0	1	1	1	1	1	1	1	1	1	1	1	1	1	1	1	1			1	1	1	1	1	1	0	1	0	0	0	0
je	VKesc+	VB-S---3P-AA---	V--S---3P-AA---	V--S---3P-AA---	V--S---3P-AA---	V--S---3P-AA---	VB-S---3P-AA---	VB-S---3P-AA---	0	1	1	1	1	1	1					1	1							1	1	1	1	1	1							1	1	1	1	1	1	1	1	1	1
mám	VKesa+	VB-S---1P-AA---	V--S---1P-AA---	V--S---1P-AA---	V--S---1P-AA---	V--S---1P-AA---	VB-S---1P-AA---	VB-S---1P-AA---	0	1	1	1	1	1	1					1	1							1	1	1	1	1	1							1	1	1	1	1	1	1	1	1	1
z	Eu2	RR--2----------	RR--2-----------	RR--2-----------	RR--2-----------	RR--2-----------	RR--2----------	RR--2----------	0	1	1	1	1	1	1	1	1	1	1	1	1													1	1	1	1	1	1
domu	SSis2	NNIS2----------	NNIS2----------	NNIS2----------	NNIS2----------	NNIS2----------	NNIS2-----A----	NNIS2-----A----	0	1	1	1	1	1	1	1	1	1	1	1	1	1	1	1	1	1	1	1	1	1	1	1	1	1	1	1	1	1	1
z	Eu2	RR--2----------	RR--2-----------	RR--2-----------	RR--2-----------	RR--2-----------	RR--2----------	RR--2----------	0	1	1	1	1	1	1	1	1	1	1	1	1													1	1	1	1	1	1
toho	PFns2	PDNS2----------	PDNS2----------	PDNS2----------	PDNS2----------	PDNS2----------	PDIS2----------	PDIS2----------	0	1	1	1	1	1	1	1	1	1	1	1	1	1	1	1	1	0	0	1	1	1	1	1	1	1	1	1	1	1	1
čo	PFns1	PDNS1----------	PDNS1----------	PDNS1----------	PDNS1----------	PDNS1----------	PQ--1----------	PQ--1----------	0	1	1	1	1	1	1	1	1	1	1	0	0	1	1	1	1			1	1	1	1			1	1	1	1	1	1
sa	R	PDNS1----------	PDNS1----------	PDNS1----------	PDNS1----------	PDNS1----------	P7-X4----------	P7-X4----------	0	1	1	1	1	1	1	1	1	1	1	0	0	1	1	1	1			1	1	1	1	0	0	1	1	1	1	0	0
doma	Dx	Db-------1-----	Db-------1-----	Db-------1-----	Db-------1-----	Db-------1-----	Db-------------	Db-------------	0	1	1	1	1	1	1	1	1	1	1	1	1
povedalo	VLdscn+	V-NX---3R-AN---	V-NX---3R-AN---	V-NX---3R-AN---	V-NX---3R-AN---	V-NX---3R-AN---	VpNS---XR-AA---	VpNS---XR-AA---	0	1	1	1	1	1	1							1	1	1	1	1	1	1	1	1	1	0	0							1	1	1	1	0	0	1	1	1	1
napríklad	T	TT-------------	TT-------------	TT-------------	TT-------------	TT-------------	TT--------------	TT--------------	0	1	1	1	1	1	1	1	1	1	1	1	1
pri	Eu6	RR--6----------	RR--6-----------	RR--6-----------	RR--6-----------	RR--6-----------	RR--6----------	RR--6----------	0	1	1	1	1	1	1	1	1	1	1	1	1													1	1	1	1	1	1
stole	SSis6	NNIS6----------	NNIS6----------	NNIS6----------	NNIS6----------	NNIS6----------	NNIS6-----A----	NNIS6-----A----	0	1	1	1	1	1	1	1	1	1	1	1	1	1	1	1	1	1	1	1	1	1	1	1	1	1	1	1	1	1	1
Otec	SSms1	NNMS1----------	NNMS1----------	NNMS1----------	NNMS1----------	NNMS1----------	NNMS1-----A----	NNMS1-----A----	0	1	1	1	1	1	1	1	1	1	1	1	1	1	1	1	1	1	1	1	1	1	1	1	1	1	1	1	1	1	1
veľa	Dx	Db-------1-----	Db-------1-----	Db-------1-----	Db-------1-----	Db-------1-----	Dg-------1A----	Dg-------1A----	0	1	1	1	1	1	1	1	1	1	1	0	0
rozprával	VLescm+	V-MS---3R-AA---	V-MS---3R-AA---	V-MS---3R-AA---	V-MS---3R-AA---	V-MS---3R-AA---	VpYS---XR-AA---	VpYS---XR-AA---	0	1	1	1	1	1	1							1	1	1	1	0	0	1	1	1	1	1	1							1	1	1	1	0	0	1	1	1	1
o	Eu6	RR--6----------	RR--6-----------	RR--6-----------	RR--6-----------	RR--6-----------	RR--6----------	RR--6----------	0	1	1	1	1	1	1	1	1	1	1	1	1													1	1	1	1	1	1
svojom	PFis6	PDIS6----------	PDIS6----------	PDIS6----------	PDIS6----------	PDIS6----------	P8IS6----------	P8IS6----------	0	1	1	1	1	1	1	1	1	1	1	0	0	1	1	1	1	1	1	1	1	1	1	1	1	1	1	1	1	1	1
literárnovednom	AAis6x	AAIS6----1-----	AAIS6----1-----	AAIS6----1-----	AAIS6----1-----	AAIS6----1-----	AAIS6----1A----	X@-------------	0	1	1	1	1	1	0	1	1	1	1	1	0	1	1	1	1	1		1	1	1	1	1		1	1	1	1	1
výskume	SSis6	NNIS6----------	NNIS6----------	NNIS6----------	NNIS6----------	NNIS6----------	NNIS6-----A----	NNIS6-----A----	0	1	1	1	1	1	1	1	1	1	1	1	1	1	1	1	1	1	1	1	1	1	1	1	1	1	1	1	1	1	1
ale	O	J^-------------	J^-------------	J^-------------	J^-------------	J^-------------	J^-------------	J^-------------	0	1	1	1	1	1	1	1	1	1	1	1	1
nevyhýbali	VLepah-	V-HP---1R-NA---	V-HP---1R-NA---	V-HP---1R-NA---	V-HP---1R-NA---	V-HP---1R-NA---	VpXP---XR-NA---	VpXP---XR-NA---	0	1	1	1	1	1	1							1	1	1	1	0	0	1	1	1	1	1	1							1	1	1	1	0	0	1	1	1	1
sme	VKepa+	VB-P---1P-AA---	V--P---1P-AA---	V--P---1P-AA---	V--P---1P-AA---	V--P---1P-AA---	VB-P---1P-AA---	VB-P---1P-AA---	0	1	1	1	1	1	1					1	1							1	1	1	1	1	1							1	1	1	1	1	1	1	1	1	1
sa	R	VB-P---1P-AA---	V--P---1P-AA---	V--P---1P-AA---	V--P---1P-AA---	V--P---1P-AA---	P7-X4----------	P7-X4----------	0	1	1	1	1	0	0					0	0							1	1	1	1	0	0							1	1	1	1			1	1	1	1
samozrejme	T	TT-------------	TT-------------	TT-------------	TT-------------	TT-------------	Dg-------1A----	Dg-------1A----	0	1	1	1	1	0	0	1	1	1	1	0	0
ani	T	TT-------------	TT-------------	TT-------------	TT-------------	TT-------------	J^-------------	J^-------------	0	1	1	1	1	0	0	1	1	1	1	0	0
súčasným	AAip3x	AAIP3----1-----	AAIP3----1-----	AAIP3----1-----	AAIP3----1-----	AAIP3----1-----	AAIS7----1A----	AAIS7----1A----	0	1	1	1	1	1	1	1	1	1	1	1	1	1	1	1	1	1	1	1	1	1	1	0	0	1	1	1	1	0	0
problémom	SSip3	NNIP3----------	NNIP3----------	NNIP3----------	NNIP3----------	NNIP3----------	NNIS7-----A----	NNIS7-----A----	0	1	1	1	1	1	1	1	1	1	1	1	1	1	1	1	1	1	1	1	1	1	1	0	0	1	1	1	1	0	0
Vtedy	PD	PY-------------	PY-------------	PY-------------	PY-------------	PY-------------	Db-------------	Db-------------	0	1	1	1	1	0	0	1	1	1	1	0	0
mi	PPhs3	PPxS3----------	PPxS3----------	PPxS3----------	PPxS3----------	PPxS3----------	PH-S3--1-------	PH-S3--1-------	0	1	1	1	1	1	1	1	1	1	1	0	0	1	1	1	1			1	1	1	1	1	1	1	1	1	1	1	1
utkveli	VLdpco+	V-XP---3R-AN---	V-FP---3R-AN---	V-XP---3R-AN---	V-FP---3R-AN---	V-XP---3R-AN---	VpXP---XR-AA---	VpXP---XR-AA---	0	1	1	1	1	1	1							0	1	0	1	1	1	1	1	1	1	1	1							1	1	1	1	0	0	1	1	1	1
v	Eu6	RR--6----------	RR--6-----------	RR--6-----------	RR--6-----------	RR--6-----------	RR--6----------	RR--6----------	0	1	1	1	1	1	1	1	1	1	1	1	1													1	1	1	1	1	1
pamäti	SSfs6	NNFS6----------	NNFS6----------	NNFS6----------	NNFS6----------	NNFS6----------	NNFS6-----A----	NNFS6-----A----	0	1	1	1	1	1	1	1	1	1	1	1	1	1	1	1	1	1	1	1	1	1	1	1	1	1	1	1	1	1	1
dátumy	SSip1	NNIP1----------	NNIP1----------	NNIP1----------	NNIP1----------	NNIP1----------	NNIP4-----A----	NNIP4-----A----	0	1	1	1	1	1	1	1	1	1	1	1	1	1	1	1	1	1	1	1	1	1	1	1	1	1	1	1	1	0	0
mená	SSnp1	NNNP1----------	NNNP1----------	NNNP1----------	NNNP1----------	NNNP1----------	NNNP4-----A----	NNNP4-----A----	0	1	1	1	1	1	1	1	1	1	1	1	1	1	1	1	1	1	1	1	1	1	1	1	1	1	1	1	1	0	0
i	O	J^-------------	J^-------------	J^-------------	J^-------------	J^-------------	J^-------------	J^-------------	0	1	1	1	1	1	1	1	1	1	1	1	1
dôležité	AAfp1x	AAFP1----1-----	AAFP1----1-----	AAFP1----1-----	AAFP1----1-----	AAFP1----1-----	AAFP4----1A----	AAFP4----1A----	0	1	1	1	1	1	1	1	1	1	1	1	1	1	1	1	1	1	1	1	1	1	1	1	1	1	1	1	1	0	0
udalosti	SSfp1	NNFP1----------	NNFP1----------	NNFP1----------	NNFP1----------	NNFP1----------	NNFP4-----A----	NNFP4-----A----	0	1	1	1	1	1	1	1	1	1	1	1	1	1	1	1	1	1	1	1	1	1	1	1	1	1	1	1	1	0	0
z	Eu2	RR--2----------	RR--2-----------	RR--2-----------	RR--2-----------	RR--2-----------	RR--2----------	RR--2----------	0	1	1	1	1	1	1	1	1	1	1	1	1													1	1	1	1	1	1
minulosti	SSfs2	NNFS2----------	NNFS2----------	NNFS2----------	NNFS2----------	NNFS2----------	NNFS2-----A----	NNFS2-----A----	0	1	1	1	1	1	1	1	1	1	1	1	1	1	1	1	1	1	1	1	1	1	1	1	1	1	1	1	1	1	1
medzi	Eu4	RR--4----------	RR--4-----------	RR--4-----------	RR--4-----------	RR--4-----------	RR--4----------	RR--4----------	0	1	1	1	1	1	1	1	1	1	1	1	1													1	1	1	1	1	1
ktoré	PAop4	P4XP4----------	P4FP4----------	P4FP4----------	P4IP4----------	P4XP4----------	P4IP4----------	P4IP4----------	0	1	1	1	1	1	1	1	1	1	1	1	1	0	0	0	1	0	0	1	1	1	1	1	1	1	1	1	1	1	1
bolo	VLescn+	V-NX---3R-AA---	V-NX---3R-AA---	V-NX---3R-AA---	V-NX---3R-AA---	V-NX---3R-AA---	VpNS---XR-AA---	VpNS---XR-AA---	0	1	1	1	1	1	1							1	1	1	1	1	1	1	1	1	1	0	0							1	1	1	1	0	0	1	1	1	1
neskôr	Dx	Db-------1-----	Db-------1-----	Db-------1-----	Db-------1-----	Db-------1-----	Dg-------2A----	Dg-------2A----	0	1	1	1	1	1	1	1	1	1	1	0	0
ľahšie	Dy	Db-------2-----	Db-------2-----	AANS1----2-----	Db-------2-----	Db-------2-----	Dg-------2A----	Dg-------2A----	0	1	0	1	1	1	1	1	0	1	1	0	0
dokladať	VIe+	Vf--------AA---	Vf--------AA---	Vf--------AA---	Vf--------AA---	Vf--------AA---	Vf--------A----	Vf--------A----	0	1	1	1	1	1	1	1	1	1	1	1	1
nové	AAip4x	AAIP4----1-----	AAIP4----1-----	AAIP4----1-----	AAIP4----1-----	AAIP4----1-----	AAIP4----1A----	AAIP4----1A----	0	1	1	1	1	1	1	1	1	1	1	1	1	1	1	1	1	1	1	1	1	1	1	1	1	1	1	1	1	1	1
dátumy	SSip4	NNIP4----------	NNIP4----------	NNIP4----------	NNIP4----------	NNIP4----------	NNIP4-----A----	NNIP4-----A----	0	1	1	1	1	1	1	1	1	1	1	1	1	1	1	1	1	1	1	1	1	1	1	1	1	1	1	1	1	1	1
mená	SSnp4	NNNP4----------	NNNP4----------	NNNP4----------	NNNP4----------	NNNP1----------	NNNP4-----A----	NNNP4-----A----	0	1	1	1	1	1	1	1	1	1	1	1	1	1	1	1	1	1	1	1	1	1	1	1	1	1	1	1	0	1	1
i	O	J^-------------	J^-------------	J^-------------	J^-------------	J^-------------	J^-------------	J^-------------	0	1	1	1	1	1	1	1	1	1	1	1	1
vzťahy	SSip4	NNIP4----------	NNIP4----------	NNIP4----------	NNIP4----------	NNIP1----------	NNIP4-----A----	NNIP4-----A----	0	1	1	1	1	1	1	1	1	1	1	1	1	1	1	1	1	1	1	1	1	1	1	1	1	1	1	1	0	1	1
Mama	SSfs1	NNFS1----------	NNFS1----------	NNFS1----------	NNFS1----------	NNFS1----------	NNFS1-----A----	NNFS1-----A----	0	1	1	1	1	1	1	1	1	1	1	1	1	1	1	1	1	1	1	1	1	1	1	1	1	1	1	1	1	1	1
pochádzala	VLescf+	V-FS---3R-AA---	V-FS---3R-AA---	V-FS---3R-AA---	V-FS---3R-AA---	V-FS---3R-AA---	VpFS---XR-AA---	VpFS---XR-AA---	0	1	1	1	1	1	1							1	1	1	1	1	1	1	1	1	1	1	1							1	1	1	1	0	0	1	1	1	1
z	Eu2	RR--2----------	RR--2-----------	RR--2-----------	RR--2-----------	RR--2-----------	RR--2----------	RR--2----------	0	1	1	1	1	1	1	1	1	1	1	1	1													1	1	1	1	1	1
rodiny	SSfs2	NNFS2----------	NNFS2----------	NNFS2----------	NNFS2----------	NNFS2----------	NNFS2-----A----	NNFS2-----A----	0	1	1	1	1	1	1	1	1	1	1	1	1	1	1	1	1	1	1	1	1	1	1	1	1	1	1	1	1	1	1
s	Eu7	RR--7----------	RR--7-----------	RR--7-----------	RR--7-----------	RR--7-----------	RR--7----------	RR--7----------	0	1	1	1	1	1	1	1	1	1	1	1	1													1	1	1	1	1	1
generáciami	SSfp7	NNFP7----------	NNFP7----------	NNFP7----------	NNFP7----------	NNFP7----------	NNFP7-----A----	NNFP7-----A----	0	1	1	1	1	1	1	1	1	1	1	1	1	1	1	1	1	1	1	1	1	1	1	1	1	1	1	1	1	1	1
evanjelických	AAmp2x	AAMP2----1-----	AAMP2----1-----	AAMP2----1-----	AAMP2----1-----	AAMP2----1-----	AAMP2----1A----	AAMP2----1A----	0	1	1	1	1	1	1	1	1	1	1	1	1	1	1	1	1	1	1	1	1	1	1	1	1	1	1	1	1	1	1
farárov	SSmp2	NNMP2----------	NNMP2----------	NNMP2----------	NNMP2----------	NNMP2----------	NNMP2-----A----	NNMP2-----A----	0	1	1	1	1	1	1	1	1	1	1	1	1	1	1	1	1	1	1	1	1	1	1	1	1	1	1	1	1	1	1
Vzdelanecké	AAns1x	AANS1----1-----	AANS1----1-----	AANS1----1-----	AANS1----1-----	AANS1----1-----	AANS1----1A----	X@-------------	0	1	1	1	1	1	0	1	1	1	1	1	0	1	1	1	1	1		1	1	1	1	1		1	1	1	1	1
pozadie	SSns1	NNNS1----------	NNNS1----------	NNNS1----------	NNNS1----------	NNNS1----------	NNNS1-----A----	NNNS1-----A----	0	1	1	1	1	1	1	1	1	1	1	1	1	1	1	1	1	1	1	1	1	1	1	1	1	1	1	1	1	1	1
rodiny	SSfs2	NNFS2----------	NNFS2----------	NNFS2----------	NNFS2----------	NNFS2----------	NNFS2-----A----	NNFS2-----A----	0	1	1	1	1	1	1	1	1	1	1	1	1	1	1	1	1	1	1	1	1	1	1	1	1	1	1	1	1	1	1
malo	VLescn+	V-NX---3R-AA---	V-NX---3R-AA---	V-NX---3R-AA---	V-NX---3R-AA---	V-NX---3R-AA---	VpNS---XR-AA---	VpNS---XR-AA---	0	1	1	1	1	1	1							1	1	1	1	1	1	1	1	1	1	0	0							1	1	1	1	0	0	1	1	1	1
pre	Eu4	RR--4----------	RR--4-----------	RR--4-----------	RR--4-----------	RR--4-----------	RR--4----------	RR--4----------	0	1	1	1	1	1	1	1	1	1	1	1	1													1	1	1	1	1	1
moju	PFfs4	PDFS4----------	PDFS4----------	PDFS4----------	PDFS4----------	PDFS4----------	PSFS4-S1-------	PSFS4-S1-------	0	1	1	1	1	1	1	1	1	1	1	0	0	1	1	1	1	1	1	1	1	1	1	1	1	1	1	1	1	1	1
budúcnosť	SSfs4	NNFS4----------	NNFS4----------	NNFS4----------	NNFS4----------	NNFS4----------	NNFS4-----A----	NNFS4-----A----	0	1	1	1	1	1	1	1	1	1	1	1	1	1	1	1	1	1	1	1	1	1	1	1	1	1	1	1	1	1	1
VEĽMI	Dx	Db-------1-----	Db-------1-----	Db-------1-----	Db-------1-----	Db-------1-----	Db-------------	Db-------------	0	1	1	1	1	1	1	1	1	1	1	1	1
DÔLEŽITÚ	AAfs4x	AAFS4----1-----	AAFS4----1-----	AAFS4----1-----	AAFS4----1-----	AAFS4----1-----	AAFS4----1A----	AAFS4----1A----	0	1	1	1	1	1	1	1	1	1	1	1	1	1	1	1	1	1	1	1	1	1	1	1	1	1	1	1	1	1	1
úlohu	SSfs4	NNFS4----------	NNFS4----------	NNFS4----------	NNFS4----------	NNFS4----------	NNFS4-----A----	NNFS4-----A----	0	1	1	1	1	1	1	1	1	1	1	1	1	1	1	1	1	1	1	1	1	1	1	1	1	1	1	1	1	1	1
Rešpektovali	VLepbh+	V-HP---2R-AA---	V-HP---2R-AA---	V-HP---2R-AA---	V-HP---2R-AA---	V-HP---2R-AA---	VpXP---XR-AA---	VpXP---XR-AA---	0	1	1	1	1	1	1							1	1	1	1	0	0	1	1	1	1	1	1							1	1	1	1	0	0	1	1	1	1
ste	VKepb+	VB-P---2P-AA---	V--P---2P-AA---	V--P---2P-AA---	V--P---2P-AA---	V--P---2P-AA---	VB-P---2P-AA---	VB-P---2P-AA---	0	1	1	1	1	1	1					1	1							1	1	1	1	1	1							1	1	1	1	1	1	1	1	1	1
otca	SSms4	NNMS4----------	NNMS4----------	NNMS4----------	NNMS4----------	NNMS4----------	NNMS4-----A----	NNMS4-----A----	0	1	1	1	1	1	1	1	1	1	1	1	1	1	1	1	1	1	1	1	1	1	1	1	1	1	1	1	1	1	1
bezvýhradne	Dx	Db-------1-----	Db-------1-----	Db-------1-----	Db-------1-----	Db-------1-----	Dg-------1A----	Dg-------1A----	0	1	1	1	1	1	1	1	1	1	1	0	0
Viera	SSfs1	NNFS1----------	NNFS1----------	NNFS1----------	NNFS1----------	NNFS1----------	NNFS1-----A----	NNFS1-----A----	0	1	1	1	1	1	1	1	1	1	1	1	1	1	1	1	1	1	1	1	1	1	1	1	1	1	1	1	1	1	1
môže	VKesc+	VB-S---3P-AA---	V--S---3P-AA---	V--S---3P-AA---	V--S---3P-AA---	V--S---3P-AA---	VB-S---3P-AA---	VB-S---3P-AA---	0	1	1	1	1	1	1					1	1							1	1	1	1	1	1							1	1	1	1	1	1	1	1	1	1
dávať	VIe+	Vf--------AA---	Vf--------AA---	Vf--------AA---	Vf--------AA---	Vf--------AA---	Vf--------A----	Vf--------A----	0	1	1	1	1	1	1	1	1	1	1	1	1
človeku	SSms3	NNMS3----------	NNMS3----------	NNMS3----------	NNMS3----------	NNMS3----------	NNMS3-----A----	NNMS3-----A----	0	1	1	1	1	1	1	1	1	1	1	1	1	1	1	1	1	1	1	1	1	1	1	1	1	1	1	1	1	1	1
životnú	AAfs4x	AAFS4----1-----	AAFS4----1-----	AAFS4----1-----	AAFS4----1-----	AAFS4----1-----	AAFS4----1A----	AAFS4----1A----	0	1	1	1	1	1	1	1	1	1	1	1	1	1	1	1	1	1	1	1	1	1	1	1	1	1	1	1	1	1	1
istotu	SSfs4	NNFS4----------	NNFS4----------	NNFS4----------	NNFS4----------	NNFS4----------	NNFS4-----A----	NNFS4-----A----	0	1	1	1	1	1	1	1	1	1	1	1	1	1	1	1	1	1	1	1	1	1	1	1	1	1	1	1	1	1	1
mieni	VKesc+	VB-S---3P-AA---	V--S---3P-AA---	V--S---3P-AA---	V--S---3P-AA---	V--S---3P-AA---	VB-S---3P-AA---	VB-S---3P-AA---	0	1	1	1	1	1	1					1	1							1	1	1	1	1	1							1	1	1	1	1	1	1	1	1	1
profesor	SSms1	NNMS1----------	NNMS1----------	NNMS1----------	NNMS1----------	NNMS1----------	NNMS1-----A----	NNMS1-----A----	0	1	1	1	1	1	1	1	1	1	1	1	1	1	1	1	1	1	1	1	1	1	1	1	1	1	1	1	1	1	1
Ďurovič	SSms1:r	NNMS1----------	NNMS1----------	NNMS1----------	NNMS1----------	NNMS1----------	NNMS1-----A----	X@-------------	0	1	1	1	1	1	0	1	1	1	1	1	0	1	1	1	1	1		1	1	1	1	1		1	1	1	1	1
Faktom	SSis7	NNIS7----------	NNIS7----------	NNIS7----------	NNMS7----------	NNIS7----------	NNIS7-----A----	NNIS7-----A----	0	1	1	1	1	1	1	1	1	1	1	1	1	1	1	0	1	1	1	1	1	1	1	1	1	1	1	1	1	1	1
je	VKesc+	VB-S---3P-AA---	V--S---3P-AA---	V--S---3P-AA---	V--S---3P-AA---	V--S---3P-AA---	VB-S---3P-AA---	VB-S---3P-AA---	0	1	1	1	1	1	1					1	1							1	1	1	1	1	1							1	1	1	1	1	1	1	1	1	1
že	O	J^-------------	J^-------------	J^-------------	J^-------------	J^-------------	J,-------------	J,-------------	0	1	1	1	1	1	1	1	1	1	1	0	0
náboženský	AAis1x	AAIS1----1-----	AAIS1----1-----	AAIS1----1-----	AAIS1----1-----	AAIS1----1-----	AAIS1----1A----	AAIS1----1A----	0	1	1	1	1	1	1	1	1	1	1	1	1	1	1	1	1	1	1	1	1	1	1	1	1	1	1	1	1	1	1
fundamentalizmus	SSis1	NNIS1----------	NNIS1----------	NNIS1----------	NNIS1----------	NNIS1----------	NNIS1-----A----	NNIS1-----A----	0	1	1	1	1	1	1	1	1	1	1	1	1	1	1	1	1	1	1	1	1	1	1	1	1	1	1	1	1	1	1
prežíva	VKesc+	VB-S---3P-AA---	V--S---3P-AA---	V--S---3P-AA---	V--S---3P-AA---	V--S---3P-AA---	VB-S---3P-AA---	VB-S---3P-AA---	0	1	1	1	1	1	1					1	1							1	1	1	1	1	1							1	1	1	1	1	1	1	1	1	1
svoju	PFfs4	PDFS4----------	PDFS4----------	PDFS4----------	PDFS4----------	PDFS4----------	P8FS4----------	P8FS4----------	0	1	1	1	1	1	1	1	1	1	1	0	0	1	1	1	1	1	1	1	1	1	1	1	1	1	1	1	1	1	1
regeneráciu	SSfs4	NNFS4----------	NNFS4----------	NNFS4----------	NNFS4----------	NNFS4----------	NNFS4-----A----	NNFS4-----A----	0	1	1	1	1	1	1	1	1	1	1	1	1	1	1	1	1	1	1	1	1	1	1	1	1	1	1	1	1	1	1
Bavilo	VLescn+	V-NX---3R-AA---	V-NX---3R-AA---	V-NX---3R-AA---	V-NX---3R-AA---	V-NX---3R-AA---	VpNS---XR-AA---	VpNS---XR-AA---	0	1	1	1	1	1	1							1	1	1	1	1	1	1	1	1	1	0	0							1	1	1	1	0	0	1	1	1	1
ma	PPhs4	PPxS4----------	PPxS4----------	PPxS4----------	PPxS4----------	PPxS4----------	PH-S4--1-------	PH-S4--1-------	0	1	1	1	1	1	1	1	1	1	1	0	0	1	1	1	1			1	1	1	1	1	1	1	1	1	1	1	1
písať	VIe+	Vf--------AA---	Vf--------AA---	Vf--------AA---	Vf--------AA---	Vf--------AA---	Vf--------A----	Vf--------A----	0	1	1	1	1	1	1	1	1	1	1	1	1
kompozície	SSfp4	NNFP4----------	NNFP4----------	NNFP4----------	NNFP1----------	NNFP4----------	NNFP4-----A----	NNFP4-----A----	0	1	1	1	1	1	1	1	1	1	1	1	1	1	1	1	1	1	1	1	1	1	1	1	1	1	1	0	1	1	1
a	O	J^-------------	J^-------------	J^-------------	J^-------------	J^-------------	J^-------------	J^-------------	0	1	1	1	1	1	1	1	1	1	1	1	1
na	Eu6	RR--6----------	RR--6-----------	RR--6-----------	RR--6-----------	RR--6-----------	RR--6----------	RR--6----------	0	1	1	1	1	1	1	1	1	1	1	1	1													1	1	1	1	1	1
vynikajúcom	Gkns6x	RR--6----------	RR--6-----------	RR--6-----------	RR--6-----------	RR--6-----------	AGIS6-----A----	AGIS6-----A----	0	1	1	1	1	0	0	1	1	1	1	0	0													1	1	1	1	1	1
skalickom	AAns6x	AANS6----1-----	AANS6----1-----	AANS6----1-----	AANS6----1-----	AANS6----1-----	AANS6----1A----	AANS6----1A----	0	1	1	1	1	1	1	1	1	1	1	1	1	1	1	1	1	1	1	1	1	1	1	1	1	1	1	1	1	1	1
gymnáziu	SSns6	NNNS6----------	NNNS6----------	NNNS6----------	NNNS6----------	NNNS6----------	NNNS6-----A----	NNNS6-----A----	0	1	1	1	1	1	1	1	1	1	1	1	1	1	1	1	1	1	1	1	1	1	1	1	1	1	1	1	1	1	1
boli	VLepcf+	V-FP---3R-AA---	V-FP---3R-AA---	V-FP---3R-AA---	V-FP---3R-AA---	V-FP---3R-AA---	VpXP---XR-AA---	VpXP---XR-AA---	0	1	1	1	1	1	1							1	1	1	1	0	0	1	1	1	1	1	1							1	1	1	1	0	0	1	1	1	1
veľmi	Dx	Db-------1-----	Db-------1-----	Db-------1-----	Db-------1-----	Db-------1-----	Db-------------	Db-------------	0	1	1	1	1	1	1	1	1	1	1	1	1
dobré	AAfp1x	AAFP1----1-----	AAFP1----1-----	AAFP1----1-----	AAFP1----1-----	AAFP1----1-----	AAFP1----1A----	AAFP1----1A----	0	1	1	1	1	1	1	1	1	1	1	1	1	1	1	1	1	1	1	1	1	1	1	1	1	1	1	1	1	1	1
podmienky	SSfp1	NNFP1----------	NNFP1----------	NNFP1----------	NNFP1----------	NNFP1----------	NNFP1-----A----	NNFP1-----A----	0	1	1	1	1	1	1	1	1	1	1	1	1	1	1	1	1	1	1	1	1	1	1	1	1	1	1	1	1	1	1
pre	Eu4	RR--4----------	RR--4-----------	RR--4-----------	RR--4-----------	RR--4-----------	RR--4----------	RR--4----------	0	1	1	1	1	1	1	1	1	1	1	1	1													1	1	1	1	1	1
kultúru	SSfs4	NNFS4----------	NNFS4----------	NNFS4----------	NNFS4----------	NNFS4----------	NNFS4-----A----	NNFS4-----A----	0	1	1	1	1	1	1	1	1	1	1	1	1	1	1	1	1	1	1	1	1	1	1	1	1	1	1	1	1	1	1
Nevyhýbali	VLepah-	V-HP---1R-NA---	V-HP---1R-NA---	V-HP---1R-NA---	V-HP---1R-NA---	V-HP---1R-NA---	VpXP---XR-NA---	VpXP---XR-NA---	0	1	1	1	1	1	1							1	1	1	1	0	0	1	1	1	1	1	1							1	1	1	1	0	0	1	1	1	1
sme	VKepa+	VB-P---1P-AA---	V--P---1P-AA---	V--P---1P-AA---	V--P---1P-AA---	V--P---1P-AA---	VB-P---1P-AA---	VB-P---1P-AA---	0	1	1	1	1	1	1					1	1							1	1	1	1	1	1							1	1	1	1	1	1	1	1	1	1
sa	R	VB-P---1P-AA---	V--P---1P-AA---	V--P---1P-AA---	V--P---1P-AA---	V--P---1P-AA---	P7-X4----------	P7-X4----------	0	1	1	1	1	0	0					0	0							1	1	1	1	0	0							1	1	1	1			1	1	1	1
ani	T	TT-------------	TT-------------	TT-------------	TT-------------	TT-------------	J^-------------	J^-------------	0	1	1	1	1	0	0	1	1	1	1	0	0
politike	SSfs3	NNFS3----------	NNFS3----------	NNFS3----------	NNFS3----------	NNFS3----------	NNFS3-----A----	NNFS3-----A----	0	1	1	1	1	1	1	1	1	1	1	1	1	1	1	1	1	1	1	1	1	1	1	1	1	1	1	1	1	1	1
Môj	PFms1	PDMS1----------	PDMS1----------	PDMS1----------	PDMS1----------	PDMS1----------	PSMS1-S1-------	PSMS1-S1-------	0	1	1	1	1	1	1	1	1	1	1	0	0	1	1	1	1	1	1	1	1	1	1	1	1	1	1	1	1	1	1
otec	SSms1	NNMS1----------	NNMS1----------	NNMS1----------	NNMS1----------	NNMS1----------	NNMS1-----A----	NNMS1-----A----	0	1	1	1	1	1	1	1	1	1	1	1	1	1	1	1	1	1	1	1	1	1	1	1	1	1	1	1	1	1	1
po	Eu6	RR--6----------	RR--6-----------	RR--6-----------	RR--6-----------	RR--6-----------	RR--6----------	RR--6----------	0	1	1	1	1	1	1	1	1	1	1	1	1													1	1	1	1	1	1
jeho	PUis6	PZIS6----------	PZIS6----------	PZIS6----------	PZIS6----------	PZIS6----------	PSXXXIS3-------	PSXXXIS3-------	0	1	1	1	1	1	1	1	1	1	1	0	0	1	1	1	1	0	0	1	1	1	1	0	0	1	1	1	1	0	0
rozpade	SSis6	NNIS6----------	NNIS6----------	NNIS6----------	NNIS6----------	NNIS6----------	NNIS6-----A----	NNIS6-----A----	0	1	1	1	1	1	1	1	1	1	1	1	1	1	1	1	1	1	1	1	1	1	1	1	1	1	1	1	1	1	1
niekoľko	PUns4	PZNS4----------	PZNS4----------	PZNS4----------	PZNS4----------	PZNS4----------	Ca--X----------	Ca--X----------	0	1	1	1	1	0	0	1	1	1	1	0	0	1	1	1	1			1	1	1	1			1	1	1	1	0	0
týždňov	SSip2	NNIP2----------	NNIP2----------	NNIP2----------	NNIP2----------	NNIP2----------	NNIP2-----A----	NNIP2-----A----	0	1	1	1	1	1	1	1	1	1	1	1	1	1	1	1	1	1	1	1	1	1	1	1	1	1	1	1	1	1	1
nespal	VLescm-	V-MS---3R-NA---	V-MS---3R-NA---	V-MS---3R-NA---	V-MS---3R-NA---	V-MS---3R-NA---	VpYS---XR-NA---	VpYS---XR-NA---	0	1	1	1	1	1	1							1	1	1	1	0	0	1	1	1	1	1	1							1	1	1	1	0	0	1	1	1	1
MÔJ	PFis1	PDIS1----------	PDIS1----------	PDIS1----------	PDIS1----------	PDIS1----------	PSMS1-S1-------	PSMS1-S1-------	0	1	1	1	1	1	1	1	1	1	1	0	0	1	1	1	1	0	0	1	1	1	1	1	1	1	1	1	1	1	1
PRIMÁRNY	AAis1x	AAIS1----1-----	AAIS1----1-----	AAIS1----1-----	AAIS1----1-----	AAIS1----1-----	AAIS1----1A----	AAIS1----1A----	0	1	1	1	1	1	1	1	1	1	1	1	1	1	1	1	1	1	1	1	1	1	1	1	1	1	1	1	1	1	1
ZÁUJEM	SSis1	NNIS1----------	NNIS1----------	NNIS1----------	NNIS1----------	NNIS1----------	NNIS1-----A----	NNIS1-----A----	0	1	1	1	1	1	1	1	1	1	1	1	1	1	1	1	1	1	1	1	1	1	1	1	1	1	1	1	1	1	1
BOLI	VLepcn+	V-NX---3R-AA---	V-NX---3R-AA---	V-NX---3R-AA---	V-NX---3R-AA---	V-NX---3R-AA---	VpXP---XR-AA---	VpXP---XR-AA---	0	1	1	1	1	1	1							1	1	1	1	0	0	1	1	1	1	0	0							1	1	1	1	0	0	1	1	1	1
HUMANIÓRA	SSnp1	NNNP1----------	NNFS1----------	NNNP1----------	NNNP1----------	NNNP1----------	NNFXX-----A---8	X@-------------	0	1	1	1	1	1	0	1	1	1	1	1	0	0	1	1	1	0		0	1	1	1	0		1	1	1	1	0
Umožniť	VId+	Vf--------AN---	Vf--------AN---	Vf--------AN---	Vf--------AN---	Vf--------AN---	Vf--------A----	Vf--------A----	0	1	1	1	1	1	1	1	1	1	1	1	1
jazykovedcovi	SSms3	NNMS3----------	NNMS3----------	NNMS3----------	NNMS3----------	NNMS3----------	NNMS3-----A----	NNMS3-----A----	0	1	1	1	1	1	1	1	1	1	1	1	1	1	1	1	1	1	1	1	1	1	1	1	1	1	1	1	1	1	1
rozhovoriť	VId+	Vf--------AN---	Vf--------AN---	Vf--------AN---	Vf--------AN---	Vf--------AN---	Vf--------A----	Vf--------A----	0	1	1	1	1	1	1	1	1	1	1	1	1
sa	R	Vf--------AN---	Vf--------AN---	Vf--------AN---	Vf--------AN---	Vf--------AN---	P7-X4----------	P7-X4----------	0	1	1	1	1	0	0	1	1	1	1	0	0
o	Eu6	RR--6----------	RR--6-----------	RR--6-----------	RR--6-----------	RR--6-----------	RR--6----------	RR--6----------	0	1	1	1	1	1	1	1	1	1	1	1	1													1	1	1	1	1	1
systéme	SSis6	NNIS6----------	NNIS6----------	NNIS6----------	NNIS6----------	NNIS6----------	NNIS6-----A----	NNIS6-----A----	0	1	1	1	1	1	1	1	1	1	1	1	1	1	1	1	1	1	1	1	1	1	1	1	1	1	1	1	1	1	1
v	Eu6	RR--6----------	RR--6-----------	RR--6-----------	RR--6-----------	RR--6-----------	RR--6----------	RR--6----------	0	1	1	1	1	1	1	1	1	1	1	1	1													1	1	1	1	1	1
jazyku	SSis6	NNIS6----------	NNIS6----------	NNIS6----------	NNIS6----------	NNIS6----------	NNIS6-----A----	NNIS6-----A----	0	1	1	1	1	1	1	1	1	1	1	1	1	1	1	1	1	1	1	1	1	1	1	1	1	1	1	1	1	1	1
prináša	VKesc+	VB-S---3P-AA---	V--S---3P-AA---	V--S---3P-AA---	V--S---3P-AA---	V--S---3P-AA---	VB-S---3P-AA---	VB-S---3P-AA---	0	1	1	1	1	1	1					1	1							1	1	1	1	1	1							1	1	1	1	1	1	1	1	1	1
zdanlivo	Dx	Db-------1-----	Db-------1-----	Db-------1-----	Db-------1-----	Db-------1-----	Dg-------1A----	Dg-------1A----	0	1	1	1	1	1	1	1	1	1	1	0	0
nebezpečenstvo	SSns4	NNNS4----------	NNNS4----------	NNNS1----------	NNNS4----------	NNNS4----------	NNNS1-----A----	NNNS1-----A----	0	1	1	1	1	1	1	1	1	1	1	1	1	1	1	1	1	1	1	1	1	1	1	1	1	1	0	1	1	0	0
že	O	J^-------------	J^-------------	J^-------------	J^-------------	J^-------------	J,-------------	J,-------------	0	1	1	1	1	1	1	1	1	1	1	0	0
sa	R	J^-------------	J^-------------	J^-------------	J^-------------	J^-------------	P7-X4----------	P7-X4----------	0	1	1	1	1	0	0	1	1	1	1	0	0
vstúpi	VKdsc+	VB-S---3P-AN---	V--S---3P-AN---	V--S---3P-AN---	V--S---3P-AN---	V--S---3P-AN---	VB-S---3P-AA---	VB-S---3P-AA---	0	1	1	1	1	1	1					1	1							1	1	1	1	1	1							1	1	1	1	1	1	1	1	1	1
do	Eu2	RR--2----------	RR--2-----------	RR--2-----------	RR--2-----------	RR--2-----------	RR--2----------	RR--2----------	0	1	1	1	1	1	1	1	1	1	1	1	1													1	1	1	1	1	1
nezaujímavého	AAis2x	AAIS2----1-----	AAIS2----1-----	AAIS2----1-----	AAIS2----1-----	AAIS2----1-----	AAIS2----1N----	AAIS2----1N----	0	1	1	1	1	1	1	1	1	1	1	1	1	1	1	1	1	1	1	1	1	1	1	1	1	1	1	1	1	1	1
a	O	J^-------------	J^-------------	J^-------------	J^-------------	J^-------------	J^-------------	J^-------------	0	1	1	1	1	1	1	1	1	1	1	1	1
nudného	AAis2x	AAIS2----1-----	AAIS2----1-----	AAIS2----1-----	AAIS2----1-----	AAIS2----1-----	AAIS2----1A----	AAIS2----1A----	0	1	1	1	1	1	1	1	1	1	1	1	1	1	1	1	1	1	1	1	1	1	1	1	1	1	1	1	1	1	1
sveta	SSis2	NNIS2----------	NNIS2----------	NNIS2----------	NNIS2----------	NNIS2----------	NNIS2-----A----	NNIS2-----A----	0	1	1	1	1	1	1	1	1	1	1	1	1	1	1	1	1	1	1	1	1	1	1	1	1	1	1	1	1	1	1
Ypsilon	SSis1	NNIS1----------	NNIS1----------	NNIS1----------	NNIS1----------	NNIS1----------	NNIS1-----A----	NNIS1-----A----	0	1	1	1	1	1	1	1	1	1	1	1	1	1	1	1	1	1	1	1	1	1	1	1	1	1	1	1	1	1	1
ako	O	J^-------------	J^-------------	J^-------------	J^-------------	J^-------------	J,-------------	J,-------------	0	1	1	1	1	1	1	1	1	1	1	0	0
hláska	SSfs1	NNFS1----------	NNFS1----------	NNFS1----------	NNFS1----------	NNFS1----------	NNFS1-----A----	NNFS1-----A----	0	1	1	1	1	1	1	1	1	1	1	1	1	1	1	1	1	1	1	1	1	1	1	1	1	1	1	1	1	1	1
nie	T	TT-------------	TT-------------	TT-------------	TT-------------	TT-------------	TT--------------	TT--------------	0	1	1	1	1	1	1	1	1	1	1	1	1
je	VKesc-	VB-S---3P-NA---	V--S---3P-AA---	V--S---3P-AA---	V--S---3P-NA---	V--S---3P-NA---	VB-S---3P-AA---	VB-S---3P-AA---	0	1	1	1	1	1	1					1	1							1	1	1	1	1	1							1	1	1	1	1	1	1	1	1	1
funkčný	AAis1x	AAIS1----1-----	AAIS1----1-----	AAIS1----1-----	AAIS1----1-----	AAIS1----1-----	AAIS1----1A----	AAIS1----1A----	0	1	1	1	1	1	1	1	1	1	1	1	1	1	1	1	1	1	1	1	1	1	1	1	1	1	1	1	1	1	1
a	O	J^-------------	J^-------------	J^-------------	J^-------------	J^-------------	J^-------------	J^-------------	0	1	1	1	1	1	1	1	1	1	1	1	1
v	Eu6	RR--6----------	RR--6-----------	RR--6-----------	RR--6-----------	RR--6-----------	RR--6----------	RR--6----------	0	1	1	1	1	1	1	1	1	1	1	1	1													1	1	1	1	1	1
slovenskom	AAis6x	AAIS6----1-----	AAIS6----1-----	AAIS6----1-----	AAIS6----1-----	AAIS6----1-----	AAIS6----1A----	AAIS6----1A----	0	1	1	1	1	1	1	1	1	1	1	1	1	1	1	1	1	1	1	1	1	1	1	1	1	1	1	1	1	1	1
jazyku	SSis6	NNIS6----------	NNIS6----------	NNIS6----------	NNIS6----------	NNIS6----------	NNIS6-----A----	NNIS6-----A----	0	1	1	1	1	1	1	1	1	1	1	1	1	1	1	1	1	1	1	1	1	1	1	1	1	1	1	1	1	1	1
takej	PAfs2	P4FS2----------	P4FS2----------	P4FS2----------	P4FS2----------	P4FS2----------	PDFS2----------	PDFS2----------	0	1	1	1	1	1	1	1	1	1	1	0	0	1	1	1	1	1	1	1	1	1	1	1	1	1	1	1	1	1	1
hlásky	SSfs2	NNFS2----------	NNFS2----------	NNFS2----------	NNFS2----------	NNFS2----------	NNFS2-----A----	NNFS2-----A----	0	1	1	1	1	1	1	1	1	1	1	1	1	1	1	1	1	1	1	1	1	1	1	1	1	1	1	1	1	1	1
niet	VKesc-	VB-S---3P-NA---	V--S---3P-NA---	V--S---3P-NA---	V--S---3P-NA---	V--S---3P-NA---	VB-P---3P-NA--1	VB-P---3P-NA--1	0	1	1	1	1	1	1					1	1							1	1	1	1	0	0							1	1	1	1	1	1	1	1	1	1
Ale	T	TT-------------	TT-------------	J^-------------	J^-------------	J^-------------	J^-------------	J^-------------	0	1	0	0	0	0	0	1	0	0	0	0	0
takto	PD	PY-------------	PY-------------	PY-------------	PY-------------	PY-------------	Db-------------	Db-------------	0	1	1	1	1	0	0	1	1	1	1	0	0
sa	R	PY-------------	PY-------------	PY-------------	PY-------------	PY-------------	P7-X4----------	P7-X4----------	0	1	1	1	1	1	1	1	1	1	1	0	0
hovorí	VKesc+	VB-S---3P-AA---	V--S---3P-AA---	V--S---3P-AA---	V--S---3P-AA---	V--S---3P-AA---	VB-S---3P-AA---	VB-S---3P-AA---	0	1	1	1	1	1	1					1	1							1	1	1	1	1	1							1	1	1	1	1	1	1	1	1	1
v	Eu6	RR--6----------	RR--6-----------	RR--6-----------	RR--6-----------	RR--6-----------	RR--6----------	RR--6----------	0	1	1	1	1	1	1	1	1	1	1	1	1													1	1	1	1	1	1
Mikuláši	SSis6:r	NNIS6----------	NNIS6----------	NNIS6----------	NNIS6----------	NNIS6----------	NNIS6-----A----	NNIS6-----A----	0	1	1	1	1	1	1	1	1	1	1	1	1	1	1	1	1	1	1	1	1	1	1	1	1	1	1	1	1	1	1
Ukazuje	VKesc+	VB-S---3P-AA---	V--S---3P-AA---	V--S---3P-AA---	V--S---3P-AA---	V--S---3P-AA---	VB-S---3P-AA---	VB-S---3P-AA---	0	1	1	1	1	1	1					1	1							1	1	1	1	1	1							1	1	1	1	1	1	1	1	1	1
sa	R	VB-S---3P-AA---	V--S---3P-AA---	V--S---3P-AA---	V--S---3P-AA---	V--S---3P-AA---	P7-X4----------	P7-X4----------	0	1	1	1	1	0	0					0	0							1	1	1	1	0	0							1	1	1	1			1	1	1	1
teda	T	TT-------------	TT-------------	TT-------------	TT-------------	TT-------------	J^-------------	J^-------------	0	1	1	1	1	0	0	1	1	1	1	0	0
že	O	J^-------------	J^-------------	J^-------------	J^-------------	J^-------------	J,-------------	J,-------------	0	1	1	1	1	1	1	1	1	1	1	0	0
tým	PFns7	PDNS7----------	PDNS7----------	PDNS7----------	PDNS7----------	PDNS7----------	PDIS7----------	PDIS7----------	0	1	1	1	1	1	1	1	1	1	1	1	1	1	1	1	1	0	0	1	1	1	1	1	1	1	1	1	1	1	1
stredoslovenským	AAns7x	AANS7----1-----	AANS7----1-----	AANS7----1-----	AANS7----1-----	AANS7----1-----	AANS7----1A----	AANS7----1A----	0	1	1	1	1	1	1	1	1	1	1	1	1	1	1	1	1	1	1	1	1	1	1	1	1	1	1	1	1	1	1
nárečím	SSns7	NNNS7----------	NNNS7----------	NNNS7----------	NNNS7----------	NNNS7----------	NNNS7-----A----	NNNS7-----A----	0	1	1	1	1	1	1	1	1	1	1	1	1	1	1	1	1	1	1	1	1	1	1	1	1	1	1	1	1	1	1
ktorÉ	PAns4	P4NS4----------	P4NS4----------	P4NS4----------	P4NS4----------	P4NS4----------	P4IP1----------	P4IP1----------	0	1	1	1	1	1	1	1	1	1	1	1	1	1	1	1	1	0	0	1	1	1	1	0	0	1	1	1	1	0	0
Štúrovci	SSmp1:r	NNMP1----------	NNMP1----------	NNMP1----------	NNMP1----------	NNMP1----------	NNMP1-----A----	NNMP1-----A----	0	1	1	1	1	1	1	1	1	1	1	1	1	1	1	1	1	1	1	1	1	1	1	1	1	1	1	1	1	1	1
povýšili	VLdpcm+	V-MP---3R-AN---	V-MP---3R-AN---	V-MP---3R-AN---	V-MP---3R-AN---	V-MP---3R-AN---	VpXP---XR-AA---	VpXP---XR-AA---	0	1	1	1	1	1	1							1	1	1	1	0	0	1	1	1	1	1	1							1	1	1	1	0	0	1	1	1	1
na	Eu4	RR--4----------	RR--4-----------	RR--4-----------	RR--4-----------	RR--4-----------	RR--4----------	RR--4----------	0	1	1	1	1	1	1	1	1	1	1	1	1													1	1	1	1	1	1
spisovný	AAis4x	AAIS4----1-----	AAIS4----1-----	AAIS4----1-----	AAIS4----1-----	AAIS4----1-----	AAIS4----1A----	AAIS4----1A----	0	1	1	1	1	1	1	1	1	1	1	1	1	1	1	1	1	1	1	1	1	1	1	1	1	1	1	1	1	1	1
JAZYK	SSis4	NNIS4----------	NNIS4----------	NNIS4----------	NNIS4----------	NNIS4----------	NNIS4-----A----	NNIS4-----A----	0	1	1	1	1	1	1	1	1	1	1	1	1	1	1	1	1	1	1	1	1	1	1	1	1	1	1	1	1	1	1
bol	VLesci+	V-IS---3R-AA---	V-IS---3R-AA---	V-IS---3R-AA---	V-IS---3R-AA---	V-IS---3R-AA---	VpYS---XR-AA---	VpYS---XR-AA---	0	1	1	1	1	1	1							1	1	1	1	0	0	1	1	1	1	1	1							1	1	1	1	0	0	1	1	1	1
prestížny	AAis1x	AAIS1----1-----	AAIS1----1-----	AAIS1----1-----	AAIS1----1-----	AAIS1----1-----	AAIS1----1A----	AAIS1----1A----	0	1	1	1	1	1	1	1	1	1	1	1	1	1	1	1	1	1	1	1	1	1	1	1	1	1	1	1	1	1	1
liptovský	AAis1x	AAIS1----1-----	AAIS1----1-----	AAIS1----1-----	AAIS1----1-----	AAIS1----1-----	AAIS1----1A----	AAIS1----1A----	0	1	1	1	1	1	1	1	1	1	1	1	1	1	1	1	1	1	1	1	1	1	1	1	1	1	1	1	1	1	1
mestský	AAis1x	AAIS1----1-----	AAIS1----1-----	AAIS1----1-----	AAIS1----1-----	AAIS1----1-----	AAIS1----1A----	AAIS1----1A----	0	1	1	1	1	1	1	1	1	1	1	1	1	1	1	1	1	1	1	1	1	1	1	1	1	1	1	1	1	1	1
jazyk	SSis1	NNIS1----------	NNIS1----------	NNIS1----------	NNIS1----------	NNIS1----------	NNIS1-----A----	NNIS1-----A----	0	1	1	1	1	1	1	1	1	1	1	1	1	1	1	1	1	1	1	1	1	1	1	1	1	1	1	1	1	1	1
Presvedčil	VLdscm+	V-MS---3R-AN---	V-MS---3R-AN---	V-MS---3R-AN---	V-MS---3R-AN---	V-MS---3R-AN---	VpYS---XR-AA---	VpYS---XR-AA---	0	1	1	1	1	1	1							1	1	1	1	0	0	1	1	1	1	1	1							1	1	1	1	0	0	1	1	1	1
Záborského	SAms4:r	NxMS4----------	NxMS4----------	NxMS4----------	NxMS4----------	AAMS4----1-----	NNNS2-----A----	NNNS2-----A----	0	1	1	1	0	1	1	1	1	1	0	0	0	1	1	1	1	0	0	1	1	1	1	1	1	1	1	1	1	0	0
že	O	J^-------------	J^-------------	J^-------------	J^-------------	J^-------------	J,-------------	J,-------------	0	1	1	1	1	1	1	1	1	1	1	0	0
správna	AAfs1x	AAFS1----1-----	AAFS1----1-----	AAFS1----1-----	AAFS1----1-----	AAFS1----1-----	AAFS1----1A----	AAFS1----1A----	0	1	1	1	1	1	1	1	1	1	1	1	1	1	1	1	1	1	1	1	1	1	1	1	1	1	1	1	1	1	1
slovenská	AAfs1x	AAFS1----1-----	AAFS1----1-----	AAFS1----1-----	AAFS1----1-----	AAFS1----1-----	AAFS1----1A----	AAFS1----1A----	0	1	1	1	1	1	1	1	1	1	1	1	1	1	1	1	1	1	1	1	1	1	1	1	1	1	1	1	1	1	1
výslovnosť	SSfs1	NNFS1----------	NNFS1----------	NNFS1----------	NNFS1----------	NNFS1----------	NNFS1-----A----	NNFS1-----A----	0	1	1	1	1	1	1	1	1	1	1	1	1	1	1	1	1	1	1	1	1	1	1	1	1	1	1	1	1	1	1
je	VKesc+	VB-S---3P-AA---	V--S---3P-AA---	V--S---3P-AA---	V--S---3P-AA---	V--S---3P-AA---	VB-S---3P-AA---	VB-S---3P-AA---	0	1	1	1	1	1	1					1	1							1	1	1	1	1	1							1	1	1	1	1	1	1	1	1	1
ľist	%	VB-S---3P-AA---	V--S---3P-AA---	V--S---3P-AA---	NNIS1----------	V--S---3P-AA---	NNIS1-----A----	X@-------------	0	1	1	0	1	0	0			0		0	0							1	1	1	1	1								1	1		1			1	1		1
V	Eu6	RR--6----------	RR--6-----------	RR--6-----------	RR--6-----------	RR--6-----------	RR--6----------	RR--6----------	0	1	1	1	1	1	1	1	1	1	1	1	1													1	1	1	1	1	1
lete	SSns6	NNNS6----------	NNNS6----------	NNIS6----------	NNNS6----------	NNNS6----------	NNNS6-----A----	NNNS6-----A----	0	1	1	1	1	1	1	1	1	1	1	1	1	1	0	1	1	1	1	1	1	1	1	1	1	1	1	1	1	1	1
v	Eu6	RR--6----------	RR--6-----------	RR--6-----------	RR--6-----------	RR--6-----------	RR--6----------	RR--6----------	0	1	1	1	1	1	1	1	1	1	1	1	1													1	1	1	1	1	1
Prahe	SSfs6:r	NNFS6----------	NNFS6----------	NNFS6----------	NNFS6----------	NNFS6----------	NNFS6-----A----	NNFS6-----A----	0	1	1	1	1	1	1	1	1	1	1	1	1	1	1	1	1	1	1	1	1	1	1	1	1	1	1	1	1	1	1
zažiadal	VLdscm+	V-MS---3R-AN---	V-MS---3R-AN---	V-MS---3R-AN---	V-MS---3R-AN---	V-MS---3R-AN---	VpYS---XR-AA---	VpYS---XR-AA---	0	1	1	1	1	1	1							1	1	1	1	0	0	1	1	1	1	1	1							1	1	1	1	0	0	1	1	1	1
o	Eu4	RR--4----------	RR--4-----------	RR--4-----------	RR--4-----------	RR--4-----------	RR--4----------	RR--4----------	0	1	1	1	1	1	1	1	1	1	1	1	1													1	1	1	1	1	1
zahraničné	AAns4x	AANS4----1-----	AANS4----1-----	AANS4----1-----	AANS4----1-----	AANS4----1-----	AANS4----1A----	AANS4----1A----	0	1	1	1	1	1	1	1	1	1	1	1	1	1	1	1	1	1	1	1	1	1	1	1	1	1	1	1	1	1	1
štipendium	SSns4	NNNS4----------	NNNS4----------	NNNS4----------	NNNS4----------	NNNS4----------	NNNS4-----A----	NNNS4-----A----	0	1	1	1	1	1	1	1	1	1	1	1	1	1	1	1	1	1	1	1	1	1	1	1	1	1	1	1	1	1	1
VEĽMI	Dx	Db-------1-----	Db-------1-----	Db-------1-----	Db-------1-----	Db-------1-----	Db-------------	Db-------------	0	1	1	1	1	1	1	1	1	1	1	1	1
KOMPLIKOVANOU	AAfs7x	AAFS7----1-----	Db-------1-----	Db-------1-----	AAFS7----1-----	AAFS7----1-----	AAFS7----1A----	AAFS7----1A----	0	0	0	1	1	1	1	0	0	1	1	1	1			1	1	1	1			1	1	1	1			1	1	1	1
ZHODOU	SSfs7	NNFS7----------	NNFS7----------	NNFS7----------	NNFS7----------	NNFS7----------	NNFS7-----A----	NNFS7-----A----	0	1	1	1	1	1	1	1	1	1	1	1	1	1	1	1	1	1	1	1	1	1	1	1	1	1	1	1	1	1	1
OKOLNOSTÍ	SSfp2	NNFP2----------	NNFP2----------	NNFP2----------	NNFP2----------	NNFP2----------	NNFP2-----A----	NNFP2-----A----	0	1	1	1	1	1	1	1	1	1	1	1	1	1	1	1	1	1	1	1	1	1	1	1	1	1	1	1	1	1	1
HO	PFns4	PDNS4----------	PDMS4----------	PDNS4----------	PDMS4----------	PDNS4----------	PHMS4--3-------	PHMS4--3-------	0	1	1	1	1	1	1	1	1	1	1	0	0	0	1	0	1	0	0	1	1	1	1	1	1	1	1	1	1	1	1
PO	Eu6	RR--6----------	RR--6-----------	RR--6-----------	RR--6-----------	RR--6-----------	RR--6----------	RR--6----------	0	1	1	1	1	1	1	1	1	1	1	1	1													1	1	1	1	1	1
ROKU	SSis6	NNIS6----------	NNIS6----------	NNIS6----------	NNIS6----------	NNIS6----------	NNIS6-----A----	NNIS6-----A----	0	1	1	1	1	1	1	1	1	1	1	1	1	1	1	1	1	1	1	1	1	1	1	1	1	1	1	1	1	1	1
dostal	VLdscm+	V-MS---3R-AN---	V-MS---3R-AN---	V-MS---3R-AN---	V-MS---3R-AN---	V-MS---3R-AN---	VpYS---XR-AA---	VpYS---XR-AA---	0	1	1	1	1	1	1							1	1	1	1	0	0	1	1	1	1	1	1							1	1	1	1	0	0	1	1	1	1
a	O	J^-------------	J^-------------	J^-------------	J^-------------	J^-------------	J^-------------	J^-------------	0	1	1	1	1	1	1	1	1	1	1	1	1
odišiel	VLdscm+	V-MS---3R-AN---	V-MS---3R-AN---	V-MS---3R-AN---	V-MS---3R-AN---	V-MS---3R-AN---	VpYS---XR-AA---	VpYS---XR-AA---	0	1	1	1	1	1	1							1	1	1	1	0	0	1	1	1	1	1	1							1	1	1	1	0	0	1	1	1	1
ROK	SSis4	NNIS4----------	NNIS4----------	NNIS4----------	NNIS4----------	NNIS4----------	NNIS4-----A----	NNIS4-----A----	0	1	1	1	1	1	1	1	1	1	1	1	1	1	1	1	1	1	1	1	1	1	1	1	1	1	1	1	1	1	1
do	Eu2	RR--2----------	RR--2-----------	RR--2-----------	RR--2-----------	RR--2-----------	RR--2----------	RR--2----------	0	1	1	1	1	1	1	1	1	1	1	1	1													1	1	1	1	1	1
Nórska	SSns2:r	NNNS2----------	NNNS2----------	NNNS2----------	NNNS2----------	NNNS2----------	NNNS2-----A----	NNNS2-----A----	0	1	1	1	1	1	1	1	1	1	1	1	1	1	1	1	1	1	1	1	1	1	1	1	1	1	1	1	1	1	1
Keď	O	J^-------------	J^-------------	J^-------------	J^-------------	J^-------------	J,-------------	J,-------------	0	1	1	1	1	1	1	1	1	1	1	0	0
sa	R	J^-------------	J^-------------	J^-------------	J^-------------	J^-------------	P7-X4----------	P7-X4----------	0	1	1	1	1	0	0	1	1	1	1	0	0
začal	VLdsci+	V-IS---3R-AN---	V-IS---3R-AN---	V-IS---3R-AN---	V-IS---3R-AN---	V-IS---3R-AN---	VpYS---XR-AA---	VpYS---XR-AA---	0	1	1	1	1	1	1							1	1	1	1	0	0	1	1	1	1	1	1							1	1	1	1	0	0	1	1	1	1
semester	SSis1	NNIS1----------	NNIS1----------	NNIS1----------	NNIS1----------	NNIS1----------	NNIS1-----A----	NNIS1-----A----	0	1	1	1	1	1	1	1	1	1	1	1	1	1	1	1	1	1	1	1	1	1	1	1	1	1	1	1	1	1	1
pustil	VLdsam+	V-MS---1R-AN---	V-MS---1R-AN---	V-MS---1R-AN---	V-MS---1R-AN---	V-MS---1R-AN---	VpYS---XR-AA---	VpYS---XR-AA---	0	1	1	1	1	1	1							1	1	1	1	0	0	1	1	1	1	1	1							1	1	1	1	0	0	1	1	1	1
som	VKesa+	VB-S---1P-AA---	V--S---1P-AA---	V--S---1P-AA---	V--S---1P-AA---	V--S---1P-AA---	VB-S---1P-AA---	VB-S---1P-AA---	0	1	1	1	1	1	1					1	1							1	1	1	1	1	1							1	1	1	1	1	1	1	1	1	1
sa	R	VB-S---1P-AA---	V--S---1P-AA---	V--S---1P-AA---	V--S---1P-AA---	V--S---1P-AA---	P7-X4----------	P7-X4----------	0	1	1	1	1	0	0					0	0							1	1	1	1	0	0							1	1	1	1			1	1	1	1
pod	Eu7	RR--7----------	RR--7-----------	RR--7-----------	RR--7-----------	RR--7-----------	RR--7----------	RR--7----------	0	1	1	1	1	1	1	1	1	1	1	1	1													1	1	1	1	1	1
vedením	SSns7	NNNS7----------	NNNS7----------	NNNS7----------	NNNS7----------	NNNS7----------	NNNS7-----A----	NNNS7-----A----	0	1	1	1	1	1	1	1	1	1	1	1	1	1	1	1	1	1	1	1	1	1	1	1	1	1	1	1	1	1	1
profesora	SSms2	NNMS2----------	NNMS2----------	NNMS2----------	NNMS2----------	NNMS2----------	NNMS2-----A----	NNMS2-----A----	0	1	1	1	1	1	1	1	1	1	1	1	1	1	1	1	1	1	1	1	1	1	1	1	1	1	1	1	1	1	1
SommerfelTa	SSms2:r	NNMS2----------	NNMS2----------	NNMS2----------	NNMS2----------	NNMS2----------	NNMS2-----A----	X@-------------	0	1	1	1	1	1	0	1	1	1	1	1	0	1	1	1	1	1		1	1	1	1	1		1	1	1	1	1
do	Eu2	RR--2----------	RR--2-----------	RR--2-----------	RR--2-----------	RR--2-----------	RR--2----------	RR--2----------	0	1	1	1	1	1	1	1	1	1	1	1	1													1	1	1	1	1	1
čítania	SSns2	NNNS2----------	NNNS2----------	NNNS2----------	NNNS2----------	NNNS2----------	NNNS2-----A----	NNNS2-----A----	0	1	1	1	1	1	1	1	1	1	1	1	1	1	1	1	1	1	1	1	1	1	1	1	1	1	1	1	1	1	1
textov	SSip2	NNIP2----------	NNIP2----------	NNIP2----------	NNIP2----------	NNIP2----------	NNIP2-----A----	NNIP2-----A----	0	1	1	1	1	1	1	1	1	1	1	1	1	1	1	1	1	1	1	1	1	1	1	1	1	1	1	1	1	1	1
Rozprávanie	SSns1	NNNS1----------	NNNS4----------	NNNS1----------	NNNS4----------	NNNS1----------	NNNS1-----A----	NNNS4-----A----	0	1	1	1	1	1	1	1	1	1	1	1	1	1	1	1	1	1	1	1	1	1	1	1	1	0	1	0	1	1	0
Ľubomíra	SSms2:r	NNMS2----------	NNMS2----------	NNMS2----------	NNMS2----------	NNMS2----------	NNMS2-----A----	NNMS2-----A----	0	1	1	1	1	1	1	1	1	1	1	1	1	1	1	1	1	1	1	1	1	1	1	1	1	1	1	1	1	1	1
Ďuroviča	SSms2:r	NNMS2----------	NNMS2----------	NNMS2----------	NNMS2----------	NNMS2----------	NNMS2-----A----	X@-------------	0	1	1	1	1	1	0	1	1	1	1	1	0	1	1	1	1	1		1	1	1	1	1		1	1	1	1	1
PRIPRAVILA	VLdscf+	V-FS---3R-AN---	V-FS---3R-AN---	V-FS---3R-AN---	V-FS---3R-AN---	V-FS---3R-AN---	VpFS---XR-AA---	VpFS---XR-AA---	0	1	1	1	1	1	1							1	1	1	1	1	1	1	1	1	1	1	1							1	1	1	1	0	0	1	1	1	1
Kveta	SSfs1:r	NNFS1----------	NNFS1----------	NNFS1----------	NNFS1----------	NNFS1----------	NNFS1-----A----	X@-------------	0	1	1	1	1	1	0	1	1	1	1	1	0	1	1	1	1	1		1	1	1	1	1		1	1	1	1	1
Škvarková	SAfs1:r	NxFS1----------	NxFS1----------	NxFS1----------	NxFS1----------	NxFS1----------	AAFS1----1A----	AAFS1----1A----	0	1	1	1	1	0	0	1	1	1	1	0	0	1	1	1	1	1	1	1	1	1	1	1	1	1	1	1	1	1	1
Protiprávna	AAfs1x	AAFS1----1-----	AAFS1----1-----	AAFS1----1-----	AAFS1----1-----	AAFS1----1-----	AAFS1----1A----	AAFS1----1A----	0	1	1	1	1	1	1	1	1	1	1	1	1	1	1	1	1	1	1	1	1	1	1	1	1	1	1	1	1	1	1
vojna	SSfs1	NNFS1----------	NNFS1----------	NNFS1----------	NNFS1----------	NNFS1----------	NNFS1-----A----	NNFS1-----A----	0	1	1	1	1	1	1	1	1	1	1	1	1	1	1	1	1	1	1	1	1	1	1	1	1	1	1	1	1	1	1
v	Eu6	RR--6----------	RR--6-----------	RR--6-----------	RR--6-----------	RR--6-----------	RR--6----------	RR--6----------	0	1	1	1	1	1	1	1	1	1	1	1	1													1	1	1	1	1	1
Iraku	SSis6:r	NNIS6----------	NNIS6----------	NNIS6----------	NNIS6----------	NNIS6----------	NNIS6-----A----	NNIS6-----A----	0	1	1	1	1	1	1	1	1	1	1	1	1	1	1	1	1	1	1	1	1	1	1	1	1	1	1	1	1	1	1
ktorú	PAfs4	P4FS4----------	P4FS4----------	P4FS4----------	P4FS4----------	P4FS4----------	P4FS4----------	P4FS4----------	0	1	1	1	1	1	1	1	1	1	1	1	1	1	1	1	1	1	1	1	1	1	1	1	1	1	1	1	1	1	1
rozpútala	VLdscf+	V-FS---3R-AN---	V-FS---3R-AN---	V-FS---3R-AN---	V-FS---3R-AN---	V-FS---3R-AN---	VpFS---XR-AA---	VpFS---XR-AA---	0	1	1	1	1	1	1							1	1	1	1	1	1	1	1	1	1	1	1							1	1	1	1	0	0	1	1	1	1
nesvätá	AAfs1x	AAFS1----1-----	AAFS1----1-----	AAFS1----1-----	AAFS1----1-----	AAFS1----1-----	AAFS1----1N----	AAFS1----1N----	0	1	1	1	1	1	1	1	1	1	1	1	1	1	1	1	1	1	1	1	1	1	1	1	1	1	1	1	1	1	1
aliancia	SSfs1	NNFS1----------	NNFS1----------	NNFS1----------	NNFS1----------	NNFS1----------	NNFS1-----A----	NNFS1-----A----	0	1	1	1	1	1	1	1	1	1	1	1	1	1	1	1	1	1	1	1	1	1	1	1	1	1	1	1	1	1	1
náboženských	AAmp2x	AAMP2----1-----	AAMP2----1-----	AAMP2----1-----	AAMP2----1-----	AAMP2----1-----	AAMP2----1A----	AAMP2----1A----	0	1	1	1	1	1	1	1	1	1	1	1	1	1	1	1	1	1	1	1	1	1	1	1	1	1	1	1	1	1	1
fundamentalistov	SSmp2	NNMP2----------	NNMP2----------	NNMP2----------	NNMP2----------	NNMP2----------	NNMP2-----A----	NNMP2-----A----	0	1	1	1	1	1	1	1	1	1	1	1	1	1	1	1	1	1	1	1	1	1	1	1	1	1	1	1	1	1	1
megalománov	SSmp2	NNMP2----------	NNMP2----------	NNMP2----------	NNMP2----------	NNMP2----------	NNMP2-----A----	X@-------------	0	1	1	1	1	1	0	1	1	1	1	1	0	1	1	1	1	1		1	1	1	1	1		1	1	1	1	1
a	O	J^-------------	J^-------------	J^-------------	J^-------------	J^-------------	J^-------------	J^-------------	0	1	1	1	1	1	1	1	1	1	1	1	1
kšeftárov	SSmp2	NNMP2----------	NNMP2----------	NNMP2----------	NNMP2----------	NNMP2----------	NNMP2-----A----	NNMP2-----A----	0	1	1	1	1	1	1	1	1	1	1	1	1	1	1	1	1	1	1	1	1	1	1	1	1	1	1	1	1	1	1
je	VKesc+	VB-S---3P-AA---	V--S---3P-AA---	V--S---3P-AA---	V--S---3P-AA---	V--S---3P-AA---	VB-S---3P-AA---	VB-S---3P-AA---	0	1	1	1	1	1	1					1	1							1	1	1	1	1	1							1	1	1	1	1	1	1	1	1	1
cynickým	AAis7x	AAIS7----1-----	AAIS7----1-----	AAIS7----1-----	AAIS7----1-----	AAIS7----1-----	AAIS7----1A----	AAIS7----1A----	0	1	1	1	1	1	1	1	1	1	1	1	1	1	1	1	1	1	1	1	1	1	1	1	1	1	1	1	1	1	1
výsmechom	SSis7	NNIS7----------	NNIS7----------	NNIS7----------	NNIS7----------	NNIS7----------	NNIS7-----A----	NNIS7-----A----	0	1	1	1	1	1	1	1	1	1	1	1	1	1	1	1	1	1	1	1	1	1	1	1	1	1	1	1	1	1	1
všetkých	PFfp2	PDFP2----------	PDFP2----------	PDFP2----------	PDFP2----------	PDFP2----------	PLXP2----------	PLXP2----------	0	1	1	1	1	1	1	1	1	1	1	0	0	1	1	1	1	0	0	1	1	1	1	1	1	1	1	1	1	1	1
hodnôt	SSfp2	NNFP2----------	NNFP2----------	NNFP2----------	NNFP2----------	NNFP2----------	NNFP2-----A----	NNFP2-----A----	0	1	1	1	1	1	1	1	1	1	1	1	1	1	1	1	1	1	1	1	1	1	1	1	1	1	1	1	1	1	1
ktoré	PAfp4	P4FP4----------	P4FP4----------	P4FP4----------	P4FP1----------	P4FP4----------	P4FP4----------	P4FP4----------	0	1	1	1	1	1	1	1	1	1	1	1	1	1	1	1	1	1	1	1	1	1	1	1	1	1	1	0	1	1	1
naša	PFfs1	PDFS1----------	PDFS1----------	PDFS1----------	PDFS1----------	PDFS1----------	PSFS1-P1-------	PSFS1-P1-------	0	1	1	1	1	1	1	1	1	1	1	0	0	1	1	1	1	1	1	1	1	1	1	1	1	1	1	1	1	1	1
západná	AAfs1x	AAFS1----1-----	AAFS1----1-----	AAFS1----1-----	AAFS1----1-----	AAFS1----1-----	AAFS1----1A----	AAFS1----1A----	0	1	1	1	1	1	1	1	1	1	1	1	1	1	1	1	1	1	1	1	1	1	1	1	1	1	1	1	1	1	1
civilizácia	SSfs1	NNFS1----------	NNFS1----------	NNFS1----------	NNFS1----------	NNFS1----------	NNFS1-----A----	NNFS1-----A----	0	1	1	1	1	1	1	1	1	1	1	1	1	1	1	1	1	1	1	1	1	1	1	1	1	1	1	1	1	1	1
pokladá	VKesc+	VB-S---3P-AA---	V--S---3P-AA---	V--S---3P-AA---	V--S---3P-AA---	V--S---3P-AA---	VB-S---3P-AA---	VB-S---3P-AA---	0	1	1	1	1	1	1					1	1							1	1	1	1	1	1							1	1	1	1	1	1	1	1	1	1
za	Eu4	RR--4----------	RR--4-----------	RR--4-----------	RR--4-----------	RR--4-----------	RR--4----------	RR--4----------	0	1	1	1	1	1	1	1	1	1	1	1	1													1	1	1	1	1	1
nedotknuteľné	AAfp4x	AAFP4----1-----	AAFP4----1-----	AAFP4----1-----	AAFP4----1-----	AAFP4----1-----	AANS4----1N----	AANS4----1N----	0	1	1	1	1	1	1	1	1	1	1	1	1	1	1	1	1	0	0	1	1	1	1	0	0	1	1	1	1	1	1
Po	Eu6	RR--6----------	RR--6-----------	RR--6-----------	RR--6-----------	RR--6-----------	RR--6----------	RR--6----------	0	1	1	1	1	1	1	1	1	1	1	1	1													1	1	1	1	1	1
ukončení	SSns6	NNNS6----------	NNNS6----------	NNNS6----------	NNNS6----------	NNNS6----------	NNNS6-----A----	NNNS6-----A----	0	1	1	1	1	1	1	1	1	1	1	1	1	1	1	1	1	1	1	1	1	1	1	1	1	1	1	1	1	1	1
tejto	PFfs2	PDFS2----------	PDFS2----------	PDFS2----------	PDFS2----------	PDFS2----------	PDFS2----------	PDFS2----------	0	1	1	1	1	1	1	1	1	1	1	1	1	1	1	1	1	1	1	1	1	1	1	1	1	1	1	1	1	1	1
vojny	SSfs2	NNFS2----------	NNFS2----------	NNFS2----------	NNFS2----------	NNFS2----------	NNFS2-----A----	NNFS2-----A----	0	1	1	1	1	1	1	1	1	1	1	1	1	1	1	1	1	1	1	1	1	1	1	1	1	1	1	1	1	1	1
nádejou	SSfs7	NNFS7----------	NNFS7----------	NNFS7----------	NNFS7----------	NNFS7----------	NNFS7-----A----	NNFS7-----A----	0	1	1	1	1	1	1	1	1	1	1	1	1	1	1	1	1	1	1	1	1	1	1	1	1	1	1	1	1	1	1
sveta	SSis2	NNIS2----------	NNIS2----------	NNIS2----------	NNIS2----------	NNIS2----------	NNIS2-----A----	NNIS2-----A----	0	1	1	1	1	1	1	1	1	1	1	1	1	1	1	1	1	1	1	1	1	1	1	1	1	1	1	1	1	1	1
je	VKesc+	VB-S---3P-AA---	V--S---3P-AA---	V--S---3P-AA---	V--S---3P-AA---	V--S---3P-AA---	VB-S---3P-AA---	VB-S---3P-AA---	0	1	1	1	1	1	1					1	1							1	1	1	1	1	1							1	1	1	1	1	1	1	1	1	1
zmena	SSfs1	NNFS1----------	NNFS1----------	NNFS1----------	NNFS1----------	NNFS1----------	NNFS1-----A----	NNFS1-----A----	0	1	1	1	1	1	1	1	1	1	1	1	1	1	1	1	1	1	1	1	1	1	1	1	1	1	1	1	1	1	1
Koruna	SSfs1	NNFS1----------	NNFS1----------	NNFS1----------	NNFS1----------	NNFS1----------	NNFS1-----A----	NNFS1-----A----	0	1	1	1	1	1	1	1	1	1	1	1	1	1	1	1	1	1	1	1	1	1	1	1	1	1	1	1	1	1	1
Sv	W	NNFS1----------	NNFS1----------	NNFS1----------	NNFS1----------	NNFS1----------	Xx-------------	Xx-------------	0	1	1	1	1	0	0	1	1	1	1	0	0	1	1	1	1			1	1	1	1			1	1	1	1
Štefana	SSms2:r	NNMS2----------	NNMS2----------	NNMS2----------	NNMS2----------	NNMS2----------	NNMS2-----A----	NNMS2-----A----	0	1	1	1	1	1	1	1	1	1	1	1	1	1	1	1	1	1	1	1	1	1	1	1	1	1	1	1	1	1	1
a	O	J^-------------	J^-------------	J^-------------	J^-------------	J^-------------	J^-------------	J^-------------	0	1	1	1	1	1	1	1	1	1	1	1	1
ostrihomský	AAis1x	AAIS1----1-----	AAIS1----1-----	AAIS1----1-----	AAMS1----1-----	AAIS1----1-----	AAMS1----1A----	AAIS1----1A----	0	1	1	1	1	1	1	1	1	1	1	1	1	1	1	0	1	0	1	1	1	1	1	1	1	1	1	1	1	1	1
Primas	%	AAIS1----1-----	AAIS1----1-----	AAIS1----1-----	AAMS1----1-----	AAIS1----1-----	NNMS1-----A----	X@-------------	0	1	1	1	1	0	0	1	1	1	1	0	0	1	1	0	1	0		1	1	1	1	1		1	1	1	1	1
Hungariae	%	AAIS1----1-----	AAIS1----1-----	AAIS1----1-----	AAMS1----1-----	AAIS1----1-----	NNMS1-----A----	X@-------------	0	1	1	1	1	0	0	1	1	1	1	0	0	1	1	0	1	0		1	1	1	1	1		1	1	1	1	1
sa	R	AAIS1----1-----	AAIS1----1-----	AAIS1----1-----	AAMS1----1-----	AAIS1----1-----	P7-X4----------	P7-X4----------	0	1	1	1	1	0	0	1	1	1	1	0	0	1	1	0	1			1	1	1	1	0	0	1	1	1	1	0	0
stali	VLdpco+	V-XP---3R-AN---	V-FP---3R-AN---	V-NX---3R-AN---	V-MP---3R-AN---	V-XP---3R-AN---	VpXP---XR-AA---	VpXP---XR-AA---	0	1	1	1	1	1	1							0	0	0	1	1	1	1	0	1	1	1	1							1	1	1	1	0	0	1	1	1	1
symbolom	SSis7	NNIS7----------	NNIS7----------	NNIS7----------	NNIS7----------	NNIS7----------	NNIS7-----A----	NNIS7-----A----	0	1	1	1	1	1	1	1	1	1	1	1	1	1	1	1	1	1	1	1	1	1	1	1	1	1	1	1	1	1	1
Uhorského	AAis2x	AAIS2----1-----	AAIS2----1-----	AAIS2----1-----	AAIS2----1-----	AAIS2----1-----	AAIS2----1A----	AAIS2----1A----	0	1	1	1	1	1	1	1	1	1	1	1	1	1	1	1	1	1	1	1	1	1	1	1	1	1	1	1	1	1	1
štátu	SSis2	NNIS2----------	NNIS2----------	NNIS2----------	NNIS2----------	NNIS2----------	NNIS2-----A----	NNIS2-----A----	0	1	1	1	1	1	1	1	1	1	1	1	1	1	1	1	1	1	1	1	1	1	1	1	1	1	1	1	1	1	1
Boja	SSis2	NNIS2----------	NNIS2----------	NNIS2----------	NNIS2----------	NNIS2----------	VB-P---3P-AA---	VB-P---3P-AA---	0	1	1	1	1	0	0	1	1	1	1	0	0	1	1	1	1			1	1	1	1	0	0	1	1	1	1
ktorého	PAis2	P4IS2----------	P4IS2----------	P4IS2----------	P4IS2----------	P4IS2----------	P4IS2----------	P4IS2----------	0	1	1	1	1	1	1	1	1	1	1	1	1	1	1	1	1	1	1	1	1	1	1	1	1	1	1	1	1	1	1
medze	SSfp4	NNFP4----------	NNFP4----------	NNFP4----------	NNFP2----------	NNFP4----------	NNFP4-----A----	NNFP4-----A----	0	1	1	1	1	1	1	1	1	1	1	1	1	1	1	1	1	1	1	1	1	1	1	1	1	1	1	0	1	1	1
určovala	VLescf+	V-FS---3R-AA---	V-FS---3R-AA---	V-FS---3R-AA---	V-FS---3R-AA---	V-FS---3R-AA---	VpFS---XR-AA---	VpFS---XR-AA---	0	1	1	1	1	1	1							1	1	1	1	1	1	1	1	1	1	1	1							1	1	1	1	0	0	1	1	1	1
Zlatá	AAfs1x:r	AAFS1----1-----	AAFS1----1-----	AAFS1----1-----	AAFS1----1-----	AAFS1----1-----	AAFS1----1A----	NNNP1-----A----	0	1	1	1	1	1	0	1	1	1	1	1	0	1	1	1	1	1	0	1	1	1	1	1	0	1	1	1	1	1	1
bulla	SSfs1	NNFS1----------	NNFS1----------	NNFS1----------	NNFS1----------	NNFS1----------	NNFS1-----A----	X@-------------	0	1	1	1	1	1	0	1	1	1	1	1	0	1	1	1	1	1		1	1	1	1	1		1	1	1	1	1
Náš	PFis1	PDIS1----------	PDIS1----------	PDIS1----------	PDIS1----------	PDIS1----------	PSMS1-P1-------	PSMS1-P1-------	0	1	1	1	1	1	1	1	1	1	1	0	0	1	1	1	1	0	0	1	1	1	1	1	1	1	1	1	1	1	1
dnešný	AAis1x	AAIS1----1-----	AAIS1----1-----	AAIS1----1-----	AAIS1----1-----	AAIS1----1-----	AAIS1----1A----	AAIS1----1A----	0	1	1	1	1	1	1	1	1	1	1	1	1	1	1	1	1	1	1	1	1	1	1	1	1	1	1	1	1	1	1
spisovný	AAis1x	AAIS1----1-----	AAIS1----1-----	AAIS1----1-----	AAIS1----1-----	AAIS1----1-----	AAIS1----1A----	AAIS1----1A----	0	1	1	1	1	1	1	1	1	1	1	1	1	1	1	1	1	1	1	1	1	1	1	1	1	1	1	1	1	1	1
jazyk	SSis1	NNIS1----------	NNIS1----------	NNIS1----------	NNIS1----------	NNIS1----------	NNIS1-----A----	NNIS1-----A----	0	1	1	1	1	1	1	1	1	1	1	1	1	1	1	1	1	1	1	1	1	1	1	1	1	1	1	1	1	1	1
je	VKesc+	VB-S---3P-AA---	V--S---3P-AA---	V--S---3P-AA---	V--S---3P-AA---	V--S---3P-AA---	VB-S---3P-AA---	VB-S---3P-AA---	0	1	1	1	1	1	1					1	1							1	1	1	1	1	1							1	1	1	1	1	1	1	1	1	1
skutočným	AAis7x	AAIS7----1-----	AAIS7----1-----	AAIS7----1-----	AAIS7----1-----	AAIS7----1-----	AAIS7----1A----	AAIS7----1A----	0	1	1	1	1	1	1	1	1	1	1	1	1	1	1	1	1	1	1	1	1	1	1	1	1	1	1	1	1	1	1
kompromisom	SSis7	NNIS7----------	NNIS7----------	NNIS7----------	NNIS7----------	NNIS7----------	NNIS7-----A----	NNIS7-----A----	0	1	1	1	1	1	1	1	1	1	1	1	1	1	1	1	1	1	1	1	1	1	1	1	1	1	1	1	1	1	1
medzi	Eu7	RR--7----------	RR--7-----------	RR--7-----------	RR--7-----------	RR--7-----------	RR--7----------	RR--7----------	0	1	1	1	1	1	1	1	1	1	1	1	1													1	1	1	1	1	1
radikálnou	AAfs7x	AAFS7----1-----	AAFS7----1-----	AAFS7----1-----	AAFS7----1-----	AAFS7----1-----	AAFS7----1A----	AAFS7----1A----	0	1	1	1	1	1	1	1	1	1	1	1	1	1	1	1	1	1	1	1	1	1	1	1	1	1	1	1	1	1	1
normou	SSfs7	NNFS7----------	NNFS7----------	NNFS7----------	NNFS7----------	NNFS7----------	NNFS7-----A----	NNFS7-----A----	0	1	1	1	1	1	1	1	1	1	1	1	1	1	1	1	1	1	1	1	1	1	1	1	1	1	1	1	1	1	1
štúrovcov	SSmp2	NNMP2----------	NNMP2----------	NNMP2----------	NNMP2----------	NNMP2----------	NNMP2-----A----	NNMP2-----A----	0	1	1	1	1	1	1	1	1	1	1	1	1	1	1	1	1	1	1	1	1	1	1	1	1	1	1	1	1	1	1
a	O	J^-------------	J^-------------	J^-------------	J^-------------	J^-------------	J^-------------	J^-------------	0	1	1	1	1	1	1	1	1	1	1	1	1
požiadavkami	SSfp7	NNFP7----------	NNFP7----------	NNFP7----------	NNFP7----------	NNFP7----------	NNFP7-----A----	NNFP7-----A----	0	1	1	1	1	1	1	1	1	1	1	1	1	1	1	1	1	1	1	1	1	1	1	1	1	1	1	1	1	1	1
bernolákovcov	SSmp2	NNMP2----------	NNMP2----------	NNMP2----------	NNMP2----------	NNMP2----------	NNIS2-----A----	X@-------------	0	1	1	1	1	1	0	1	1	1	1	1	0	1	1	1	1	0		1	1	1	1	0		1	1	1	1	1
i	O	J^-------------	J^-------------	J^-------------	J^-------------	J^-------------	J^-------------	J^-------------	0	1	1	1	1	1	1	1	1	1	1	1	1
tradíciou	SSfs7	NNFS7----------	NNFS7----------	NNFS7----------	NNFS7----------	NNFS7----------	NNFS7-----A----	NNFS7-----A----	0	1	1	1	1	1	1	1	1	1	1	1	1	1	1	1	1	1	1	1	1	1	1	1	1	1	1	1	1	1	1
českou	AAfs7x	AAFS7----1-----	AAFS7----1-----	AAFS7----1-----	AAFS7----1-----	AAFS7----1-----	AAFS7----1A----	AAFS7----1A----	0	1	1	1	1	1	1	1	1	1	1	1	1	1	1	1	1	1	1	1	1	1	1	1	1	1	1	1	1	1	1
či	O	J^-------------	J^-------------	J^-------------	J^-------------	J^-------------	J^-------------	J^-------------	0	1	1	1	1	1	1	1	1	1	1	1	1
československou	AAfs7x	AAFS7----1-----	AAFS7----1-----	AAFS7----1-----	AAFS7----1-----	AAFS7----1-----	AAFS7----1A----	AAFS7----1A----	0	1	1	1	1	1	1	1	1	1	1	1	1	1	1	1	1	1	1	1	1	1	1	1	1	1	1	1	1	1	1
Starú	AAfs4x	AAFS4----1-----	AAFS4----1-----	AAFS4----1-----	AAFS4----1-----	AAFS4----1-----	AAFS4----1A----	AAFS4----1A----	0	1	1	1	1	1	1	1	1	1	1	1	1	1	1	1	1	1	1	1	1	1	1	1	1	1	1	1	1	1	1
meravú	AAfs4x	AAFS4----1-----	AAFS4----1-----	AAFS4----1-----	AAFS4----1-----	AAFS4----1-----	AAFS4----1A----	AAFS4----1A----	0	1	1	1	1	1	1	1	1	1	1	1	1	1	1	1	1	1	1	1	1	1	1	1	1	1	1	1	1	1	1
nekompromisnosť	SSfs4	NNFS4----------	NNFS4----------	NNFS4----------	NNFS4----------	NNFS4----------	NNFS4-----N----	NNFS4-----N----	0	1	1	1	1	1	1	1	1	1	1	1	1	1	1	1	1	1	1	1	1	1	1	1	1	1	1	1	1	1	1
a	O	J^-------------	J^-------------	J^-------------	J^-------------	J^-------------	J^-------------	J^-------------	0	1	1	1	1	1	1	1	1	1	1	1	1
nekomunikatívnosť	SSfs4	NNFS4----------	NNFS4----------	NNFS4----------	NNFS4----------	NNFS4----------	NNFS4-----N----	NNFS4-----N----	0	1	1	1	1	1	1	1	1	1	1	1	1	1	1	1	1	1	1	1	1	1	1	1	1	1	1	1	1	1	1
oživila	VLdscf+	V-FS---3R-AN---	V-FS---3R-AN---	V-FS---3R-AN---	V-FS---3R-AN---	V-FS---3R-AN---	VpFS---XR-AA---	VpFS---XR-AA---	0	1	1	1	1	1	1							1	1	1	1	1	1	1	1	1	1	1	1							1	1	1	1	0	0	1	1	1	1
idea	SSfs1	NNFS1----------	NNFS1----------	NNFS1----------	NNFS1----------	NNFS1----------	NNFS1-----A----	NNFS1-----A----	0	1	1	1	1	1	1	1	1	1	1	1	1	1	1	1	1	1	1	1	1	1	1	1	1	1	1	1	1	1	1
odtrhnutia	SSns2	NNNS2----------	NNNS2----------	NNNS2----------	NNNS2----------	NNNS2----------	NNNS2-----A----	NNNS2-----A----	0	1	1	1	1	1	1	1	1	1	1	1	1	1	1	1	1	1	1	1	1	1	1	1	1	1	1	1	1	1	1
Slovenska	SSns2:r	NNNS2----------	NNNS2----------	NNNS2----------	NNNS2----------	NNNS2----------	NNNS2-----A----	NNNS2-----A----	0	1	1	1	1	1	1	1	1	1	1	1	1	1	1	1	1	1	1	1	1	1	1	1	1	1	1	1	1	1	1
od	Eu2	RR--2----------	RR--2-----------	RR--2-----------	RR--2-----------	RR--2-----------	RR--2----------	RR--2----------	0	1	1	1	1	1	1	1	1	1	1	1	1													1	1	1	1	1	1
tisícročného	AAns2x	AANS2----1-----	AANS2----1-----	AANS2----1-----	AANS2----1-----	AANS2----1-----	AANS2----1A----	AANS2----1A----	0	1	1	1	1	1	1	1	1	1	1	1	1	1	1	1	1	1	1	1	1	1	1	1	1	1	1	1	1	1	1
Uhorska	SSns2:r	NNNS2----------	NNNS2----------	NNNS2----------	NNNS2----------	NNNS2----------	NNNS2-----A----	NNNS2-----A----	0	1	1	1	1	1	1	1	1	1	1	1	1	1	1	1	1	1	1	1	1	1	1	1	1	1	1	1	1	1	1
a	O	J^-------------	J^-------------	J^-------------	J^-------------	J^-------------	J^-------------	J^-------------	0	1	1	1	1	1	1	1	1	1	1	1	1
najmä	T	TT-------------	TT-------------	TT-------------	TT-------------	TT-------------	Db-------------	Db-------------	0	1	1	1	1	0	0	1	1	1	1	0	0
štátneho	AAns2x	AANS2----1-----	AANS2----1-----	AANS2----1-----	AANS2----1-----	AANS2----1-----	AANS2----1A----	AANS2----1A----	0	1	1	1	1	1	1	1	1	1	1	1	1	1	1	1	1	1	1	1	1	1	1	1	1	1	1	1	1	1	1
spojenia	SSns2	NNNS2----------	NNNS2----------	NNNS2----------	NNNS2----------	NNNS2----------	NNNS2-----A----	NNNS2-----A----	0	1	1	1	1	1	1	1	1	1	1	1	1	1	1	1	1	1	1	1	1	1	1	1	1	1	1	1	1	1	1
s	Eu7	RR--7----------	RR--7-----------	RR--7-----------	RR--7-----------	RR--7-----------	RR--7----------	RR--7----------	0	1	1	1	1	1	1	1	1	1	1	1	1													1	1	1	1	1	1
Čechmi	SSmp7:r	NNMP7----------	NNMP7----------	NNMP7----------	NNMP7----------	NNMP7----------	NNMP7-----A----	NNMP7-----A----	0	1	1	1	1	1	1	1	1	1	1	1	1	1	1	1	1	1	1	1	1	1	1	1	1	1	1	1	1	1	1
Takže	T	TT-------------	TT-------------	TT-------------	TT-------------	TT-------------	J,-------------	J,-------------	0	1	1	1	1	0	0	1	1	1	1	0	0
nacionalisticko	Q	TT-------------	TT-------------	TT-------------	TT-------------	TT-------------	NNNS1-----A----	X@-------------	0	1	1	1	1	0	0	1	1	1	1	0	0
sociálny	AAis1x	AAIS1----1-----	AAIS1----1-----	AAIS1----1-----	AAIS1----1-----	AAIS1----1-----	AAIS1----1A----	AAIS1----1A----	0	1	1	1	1	1	1	1	1	1	1	1	1	1	1	1	1	1	1	1	1	1	1	1	1	1	1	1	1	1	1
populizmus	SSis1	NNIS1----------	NNIS1----------	NNIS1----------	NNIS1----------	NNIS1----------	NNIS1-----A----	NNIS1-----A----	0	1	1	1	1	1	1	1	1	1	1	1	1	1	1	1	1	1	1	1	1	1	1	1	1	1	1	1	1	1	1
Mečiarov	AFis1x:r	AUIS1----1-----	AUIS1----1-----	AUIS1----1-----	AUIS1----1-----	AUIS1----1-----	NNMP2-----A----	NNMP2-----A----	0	1	1	1	1	0	0	1	1	1	1	0	0	1	1	1	1	0	0	1	1	1	1	0	0	1	1	1	1	0	0
je	VKesc+	VB-S---3P-AA---	V--S---3P-AA---	V--S---3P-AA---	V--S---3P-AA---	V--S---3P-AA---	VB-S---3P-AA---	VB-S---3P-AA---	0	1	1	1	1	1	1					1	1							1	1	1	1	1	1							1	1	1	1	1	1	1	1	1	1
povedal	VLdsam+	V-MS---1R-AN---	V-MS---1R-AN---	V-MS---1R-AN---	V-MS---1R-AN---	V-MS---1R-AN---	VpYS---XR-AA---	VpYS---XR-AA---	0	1	1	1	1	1	1							1	1	1	1	0	0	1	1	1	1	1	1							1	1	1	1	0	0	1	1	1	1
by	Y	V-MS---1R-AN---	V-MS---1R-AN---	V-MS---1R-AN---	V-MS---1R-AN---	V-MS---1R-AN---	Vc-------------	Vc-------------	0	1	1	1	1	1	1							1	1	1	1			1	1	1	1									1	1	1	1			1	1	1	1
som	VKesa+	VB-S---1P-AA---	V--S---1P-AA---	V--S---1P-AA---	V--S---1P-AA---	V--S---1P-AA---	VB-S---1P-AA---	VB-S---1P-AA---	0	1	1	1	1	1	1					1	1							1	1	1	1	1	1							1	1	1	1	1	1	1	1	1	1
prirodzeným	AAis7x	AAIS7----1-----	AAIS7----1-----	AAIS7----1-----	AAIS7----1-----	AAIS7----1-----	AAIS7----1A----	AAIS7----1A----	0	1	1	1	1	1	1	1	1	1	1	1	1	1	1	1	1	1	1	1	1	1	1	1	1	1	1	1	1	1	1
plodom	SSis7	NNIS7----------	NNIS7----------	NNIS7----------	NNIS7----------	NNIS7----------	NNIS7-----A----	NNIS7-----A----	0	1	1	1	1	1	1	1	1	1	1	1	1	1	1	1	1	1	1	1	1	1	1	1	1	1	1	1	1	1	1
stáročného	AAis2x	AAIS2----1-----	AAIS2----1-----	AAIS2----1-----	AAIS2----1-----	AAIS2----1-----	AAIS2----1A----	AAIS2----1A----	0	1	1	1	1	1	1	1	1	1	1	1	1	1	1	1	1	1	1	1	1	1	1	1	1	1	1	1	1	1	1
vývinu	SSis2	NNIS2----------	NNIS2----------	NNIS2----------	NNIS2----------	NNIS2----------	NNIS2-----A----	NNIS2-----A----	0	1	1	1	1	1	1	1	1	1	1	1	1	1	1	1	1	1	1	1	1	1	1	1	1	1	1	1	1	1	1
slovenskej	AAfs2x	AAFS2----1-----	AAFS2----1-----	AAFS2----1-----	AAFS2----1-----	AAFS2----1-----	AAFS2----1A----	AAFS2----1A----	0	1	1	1	1	1	1	1	1	1	1	1	1	1	1	1	1	1	1	1	1	1	1	1	1	1	1	1	1	1	1
spoločnosti	SSfs2	NNFS2----------	NNFS2----------	NNFS2----------	NNFS2----------	NNFS2----------	NNFS2-----A----	NNFS2-----A----	0	1	1	1	1	1	1	1	1	1	1	1	1	1	1	1	1	1	1	1	1	1	1	1	1	1	1	1	1	1	1
Ľubomír	SSms1:r	NNMS1----------	NNMS1----------	NNMS1----------	NNMS1----------	NNMS1----------	NNMS1-----A----	NNMS1-----A----	0	1	1	1	1	1	1	1	1	1	1	1	1	1	1	1	1	1	1	1	1	1	1	1	1	1	1	1	1	1	1
Ďurovič	SSms1:r	NNMS1----------	NNMS1----------	NNMS1----------	NNMS1----------	NNMS1----------	NNMS1-----A----	X@-------------	0	1	1	1	1	1	0	1	1	1	1	1	0	1	1	1	1	1		1	1	1	1	1		1	1	1	1	1
Pre	Eu4	RR--4----------	RR--4-----------	RR--4-----------	RR--4-----------	RR--4-----------	RR--4----------	RR--4----------	0	1	1	1	1	1	1	1	1	1	1	1	1													1	1	1	1	1	1
časopis	SSis4	NNIS4----------	NNIS4----------	NNIS4----------	NNIS4----------	NNIS4----------	NNIS4-----A----	NNIS4-----A----	0	1	1	1	1	1	1	1	1	1	1	1	1	1	1	1	1	1	1	1	1	1	1	1	1	1	1	1	1	1	1
Záhorského	AAns2:r	AANS2----------	AANS2----1-----	AANS2----1-----	AANS2----1-----	AANS2----1-----	AANS2----1A----	AANS2----1A----	0	1	1	1	1	1	1	1	1	1	1	1	1	1	1	1	1	1	1	1	1	1	1	1	1	1	1	1	1	1	1
múzea	SSns2	NNNS2----------	NNNS2----------	NNNS2----------	NNNS2----------	NNNS2----------	NNNS2-----A----	NNNS2-----A----	0	1	1	1	1	1	1	1	1	1	1	1	1	1	1	1	1	1	1	1	1	1	1	1	1	1	1	1	1	1	1
v	Eu6	RR--6----------	RR--6-----------	RR--6-----------	RR--6-----------	RR--6-----------	RR--6----------	RR--6----------	0	1	1	1	1	1	1	1	1	1	1	1	1													1	1	1	1	1	1
Skalici	SSfs6:r	NNFS6----------	NNFS6----------	NNFS6----------	NNFS6----------	NNFS6----------	NNFS6-----A----	NNFS6-----A----	0	1	1	1	1	1	1	1	1	1	1	1	1	1	1	1	1	1	1	1	1	1	1	1	1	1	1	1	1	1	1
Záhorie	SSns1:r	NNNS1----------	NNNS1----------	NNNS1----------	NNNS1----------	NNNS1----------	NNNS1-----A----	NNNS1-----A----	0	1	1	1	1	1	1	1	1	1	1	1	1	1	1	1	1	1	1	1	1	1	1	1	1	1	1	1	1	1	1
Výstava	SSfs1	NNFS1----------	NNFS1----------	NNFS1----------	NNFS1----------	NNFS1----------	NNFS1-----A----	NNFS1-----A----	0	1	1	1	1	1	1	1	1	1	1	1	1	1	1	1	1	1	1	1	1	1	1	1	1	1	1	1	1	1	1
vzorného	AAns2x	AANS2----1-----	AANS2----1-----	AANS2----1-----	AANS2----1-----	AANS2----1-----	AANS2----1A----	AANS2----1A----	0	1	1	1	1	1	1	1	1	1	1	1	1	1	1	1	1	1	1	1	1	1	1	1	1	1	1	1	1	1	1
balenia	SSns2	NNNS2----------	NNNS2----------	NNNS2----------	NNNS2----------	NNNS2----------	NNNS2-----A----	NNNS2-----A----	0	1	1	1	1	1	1	1	1	1	1	1	1	1	1	1	1	1	1	1	1	1	1	1	1	1	1	1	1	1	1
potravín	SSfp2	NNFP2----------	NNFP2----------	NNFP2----------	NNFP2----------	NNFP2----------	NNFP2-----A----	NNFP2-----A----	0	1	1	1	1	1	1	1	1	1	1	1	1	1	1	1	1	1	1	1	1	1	1	1	1	1	1	1	1	1	1
v	Eu6	RR--6----------	RR--6-----------	RR--6-----------	RR--6-----------	RR--6-----------	RR--6----------	RR--6----------	0	1	1	1	1	1	1	1	1	1	1	1	1													1	1	1	1	1	1
Skalici	SSfs6:r	NNFS6----------	NNFS6----------	NNFS6----------	NNFS6----------	NNFS6----------	NNFS6-----A----	NNFS6-----A----	0	1	1	1	1	1	1	1	1	1	1	1	1	1	1	1	1	1	1	1	1	1	1	1	1	1	1	1	1	1	1
Nemôžem	VKesa-	VB-S---1P-NA---	V--S---1P-NA---	V--S---1P-NA---	V--S---1P-NA---	V--S---1P-NA---	VB-S---1P-NA---	VB-S---1P-NA---	0	1	1	1	1	1	1					1	1							1	1	1	1	1	1							1	1	1	1	1	1	1	1	1	1
pritom	Dx	Db-------1-----	Db-------1-----	Db-------1-----	Db-------1-----	Db-------1-----	Db-------------	Db-------------	0	1	1	1	1	1	1	1	1	1	1	1	1
nespomenúť	VId-	Vf--------NN---	Vf--------NN---	Vf--------NN---	Vf--------NN---	Vf--------NN---	Vf--------N----	Vf--------N----	0	1	1	1	1	1	1	1	1	1	1	1	1
ešte	T	TT-------------	TT-------------	TT-------------	TT-------------	TT-------------	Db-------------	Db-------------	0	1	1	1	1	0	0	1	1	1	1	0	0
jednu	NFfs4	CxFS4----------	CxFS4----------	CxFS4----------	CxFS4----------	CxFS4----------	ClFS4----------	ClFS4----------	0	1	1	1	1	1	1	1	1	1	1	0	0	1	1	1	1	1	1	1	1	1	1	1	1	1	1	1	1	1	1
vec	SSfs4	NNFS4----------	NNFS4----------	NNFS4----------	NNFS4----------	NNFS4----------	NNFS4-----A----	NNFS4-----A----	0	1	1	1	1	1	1	1	1	1	1	1	1	1	1	1	1	1	1	1	1	1	1	1	1	1	1	1	1	1	1
Kto	PFms1	PDMS1----------	PDMS1----------	PDMS1----------	PDMS1----------	PDMS1----------	PKM-1----------	PKM-1----------	0	1	1	1	1	1	1	1	1	1	1	0	0	1	1	1	1	1	1	1	1	1	1			1	1	1	1	1	1
by	Y	PDMS1----------	PDMS1----------	PDMS1----------	PDMS1----------	PDMS1----------	Vc-------------	Vc-------------	0	1	1	1	1	0	0	1	1	1	1	0	0	1	1	1	1			1	1	1	1			1	1	1	1
to	PFns4	PDNS4----------	PDNS4----------	PDNS4----------	PDNS4----------	PDNS4----------	PDNS4----------	PDNS4----------	0	1	1	1	1	1	1	1	1	1	1	1	1	1	1	1	1	1	1	1	1	1	1	1	1	1	1	1	1	1	1
kupoval	VLescm+	V-MS---3R-AA---	V-MS---3R-AA---	V-MS---3R-AA---	V-MS---3R-AA---	V-MS---3R-AA---	VpYS---XR-AA---	VpYS---XR-AA---	0	1	1	1	1	1	1							1	1	1	1	0	0	1	1	1	1	1	1							1	1	1	1	0	0	1	1	1	1
A	O	J^-------------	J^-------------	J^-------------	J^-------------	J^-------------	J^-------------	J^-------------	0	1	1	1	1	1	1	1	1	1	1	1	1
obchody	SSip1	NNIP1----------	NNIP1----------	NNIP1----------	NNIP1----------	NNIP1----------	NNIP1-----A----	NNIP1-----A----	0	1	1	1	1	1	1	1	1	1	1	1	1	1	1	1	1	1	1	1	1	1	1	1	1	1	1	1	1	1	1
ktoré	PAip1	P4IP1----------	P4IP1----------	P4IP1----------	P4IP1----------	P4FP1----------	P4IP1----------	P4IP1----------	0	1	1	1	1	1	1	1	1	1	1	1	1	1	1	1	0	1	1	1	1	1	1	1	1	1	1	1	1	1	1
chcú	VKepc+	VB-P---3P-AA---	V--P---3P-AA---	V--P---3P-AA---	V--P---3P-AA---	V--P---3P-AA---	VB-P---3P-AA---	VB-P---3P-AA---	0	1	1	1	1	1	1					1	1							1	1	1	1	1	1							1	1	1	1	1	1	1	1	1	1
predávať	VIe+	Vf--------AA---	Vf--------AA---	Vf--------AA---	Vf--------AA---	Vf--------AA---	Vf--------A----	Vf--------A----	0	1	1	1	1	1	1	1	1	1	1	1	1
zaručene	Dx	Db-------1-----	Db-------1-----	Db-------1-----	Db-------1-----	Db-------1-----	Dg-------1A----	Dg-------1A----	0	1	1	1	1	1	1	1	1	1	1	0	0
čerstvý	AAis4x	AAIS4----1-----	AAIS4----1-----	AAMS1----1-----	AAIS4----1-----	AAIS4----1-----	AAIS4----1A----	AAIS4----1A----	0	1	1	1	1	1	1	1	1	1	1	1	1	1	0	1	1	1	1	1	1	1	1	1	1	1	0	1	1	1	1
v	Eu6	RR--6----------	RR--6-----------	RR--6-----------	RR--6-----------	RR--6-----------	RR--6----------	RR--6----------	0	1	1	1	1	1	1	1	1	1	1	1	1													1	1	1	1	1	1
noci	SSfs6	NNFS6----------	NNFS6----------	NNFS6----------	NNFS6----------	NNFS6----------	NNFS6-----A----	NNFS6-----A----	0	1	1	1	1	1	1	1	1	1	1	1	1	1	1	1	1	1	1	1	1	1	1	1	1	1	1	1	1	1	1
upečený	Gtis4x	NNFS6----------	NNFS6----------	NNFS6----------	NNFS6----------	NNFS6----------	AAIS4----1A----	AAIS4----1A----	0	1	1	1	1	0	0	1	1	1	1	0	0	1	1	1	1	0	0	1	1	1	1	1	1	1	1	1	1	0	0
a	O	J^-------------	J^-------------	J^-------------	J^-------------	J^-------------	J^-------------	J^-------------	0	1	1	1	1	1	1	1	1	1	1	1	1
nezabalený	Gtis4x	J^-------------	J^-------------	J^-------------	J^-------------	J^-------------	AAIS4----1N----	AAIS4----1N----	0	1	1	1	1	0	0	1	1	1	1	0	0
chlieb	SSis4	NNIS4----------	NNIS4----------	NNIS4----------	NNIS4----------	NNIS4----------	NNIS4-----A----	NNIS4-----A----	0	1	1	1	1	1	1	1	1	1	1	1	1	1	1	1	1	1	1	1	1	1	1	1	1	1	1	1	1	1	1
musia	VKepc+	VB-P---3P-AA---	V--P---3P-AA---	V--P---3P-AA---	V--P---3P-AA---	V--P---3P-AA---	VB-P---3P-AA---	VB-P---3P-AA---	0	1	1	1	1	1	1					1	1							1	1	1	1	1	1							1	1	1	1	1	1	1	1	1	1
ho	PFis4	PDIS4----------	PDIS4----------	PDMS4----------	PDMS4----------	PDMS4----------	PHMS4--3-------	PHMS4--3-------	0	1	1	1	1	1	1	1	1	1	1	0	0	1	0	0	0	0	0	1	1	1	1	1	1	1	1	1	1	1	1
držať	VIe+	Vf--------AA---	Vf--------AA---	Vf--------AA---	Vf--------AA---	Vf--------AA---	Vf--------A----	Vf--------A----	0	1	1	1	1	1	1	1	1	1	1	1	1
v	Eu6	RR--6----------	RR--6-----------	RR--6-----------	RR--6-----------	RR--6-----------	RR--6----------	RR--6----------	0	1	1	1	1	1	1	1	1	1	1	1	1													1	1	1	1	1	1
osobitných	AAfp6x	AAFP6----1-----	AAFP6----1-----	AAFP6----1-----	AAFP6----1-----	AAFP6----1-----	AAFP6----1A----	AAFP6----1A----	0	1	1	1	1	1	1	1	1	1	1	1	1	1	1	1	1	1	1	1	1	1	1	1	1	1	1	1	1	1	1
zasklených	Gtfp6x	AAFP6----1-----	AAFP6----1-----	AAFP6----1-----	AAFP6----1-----	AAFP6----1-----	AAFP6----1A----	AAFP6----1A----	0	1	1	1	1	1	1	1	1	1	1	1	1	1	1	1	1	1	1	1	1	1	1	1	1	1	1	1	1	1	1
policiach	SSfp6	NNFP6----------	NNFP6----------	NNFP6----------	NNFP6----------	NNFP6----------	NNFP6-----A----	NNFP6-----A----	0	1	1	1	1	1	1	1	1	1	1	1	1	1	1	1	1	1	1	1	1	1	1	1	1	1	1	1	1	1	1
takže	O	J^-------------	J^-------------	J^-------------	J^-------------	TT-------------	J,-------------	J,-------------	0	1	1	1	0	1	1	1	1	1	0	0	0
skôr	Dx	Db-------1-----	TT-------------	TT-------------	TT-------------	Db-------1-----	Dg-------2A----	Dg-------2A----	0	0	0	0	1	1	1	0	0	0	1	0	0
nebalenie	SSns1	NNNS1----------	NNNS1----------	NNNS1----------	NNNS1----------	NNNS1----------	NNNS1-----N----	NNNS1-----N----	0	1	1	1	1	1	1	1	1	1	1	1	1	1	1	1	1	1	1	1	1	1	1	1	1	1	1	1	1	1	1
chlieb	SSis4	NNIS4----------	NNFP2----------	NNIS1----------	NNIS1----------	NNIS4----------	NNIS4-----A----	NNIS4-----A----	0	1	1	1	1	1	1	1	1	1	1	1	1	0	1	1	1	1	1	0	1	1	1	1	1	0	0	0	1	1	1
zdražuje	VKesc+	VB-S---3P-AA---	V--S---3P-AA---	V--S---3P-AA---	V--S---3P-AA---	V--S---3P-AA---	VB-S---3P-AA---	VB-S---3P-AA---	0	1	1	1	1	1	1					1	1							1	1	1	1	1	1							1	1	1	1	1	1	1	1	1	1
Ľubomír	SSms1:r	NNMS1----------	NNMS1----------	NNMS1----------	NNMS1----------	NNMS1----------	NNMS1-----A----	NNMS1-----A----	0	1	1	1	1	1	1	1	1	1	1	1	1	1	1	1	1	1	1	1	1	1	1	1	1	1	1	1	1	1	1
Ďurovič	SSms1:r	NNMS1----------	NNMS1----------	NNMS1----------	NNMS1----------	NNMS1----------	NNMS1-----A----	X@-------------	0	1	1	1	1	1	0	1	1	1	1	1	0	1	1	1	1	1		1	1	1	1	1		1	1	1	1	1
Vlastný	AAis1x	AAIS1----1-----	NxMS1----------	AAIS4----1-----	AAIS1----1-----	AAIS1----1-----	AAIS4----1A----	AAIS4----1A----	0	0	1	1	1	1	1	0	1	1	1	1	1	0	1	1	1	1	1	1	1	1	1	1	1	1	0	1	1	0	0
gól	SSis1	NNIS1----------	NNIS4----------	NNIS4----------	NNIS1----------	NNIS1----------	NNIS4-----A----	NNIS4-----A----	0	1	1	1	1	1	1	1	1	1	1	1	1	1	1	1	1	1	1	1	1	1	1	1	1	0	0	1	1	0	0
slovenskej	AAfs2x	AAFS2----1-----	AAFS2----1-----	AAFS2----1-----	AAFS2----1-----	AAFS2----1-----	AAFS2----1A----	AAFS2----1A----	0	1	1	1	1	1	1	1	1	1	1	1	1	1	1	1	1	1	1	1	1	1	1	1	1	1	1	1	1	1	1
inteligencie	SSfs2	NNFS2----------	NNFS2----------	NNFS2----------	NNFS2----------	NNFS2----------	NNFS2-----A----	NNFS2-----A----	0	1	1	1	1	1	1	1	1	1	1	1	1	1	1	1	1	1	1	1	1	1	1	1	1	1	1	1	1	1	1
Pred	Eu7	RR--7----------	RR--7-----------	RR--7-----------	RR--7-----------	RR--7-----------	RR--7----------	RR--7----------	0	1	1	1	1	1	1	1	1	1	1	1	1													1	1	1	1	1	1
voľbami	SSfp7	NNFP7----------	NNFP7----------	NNFP7----------	NNFP7----------	NNFP7----------	NNFP7-----A----	NNFP7-----A----	0	1	1	1	1	1	1	1	1	1	1	1	1	1	1	1	1	1	1	1	1	1	1	1	1	1	1	1	1	1	1
bolo	VLescn+	V-NX---3R-AA---	V-NX---3R-AA---	V-NX---3R-AA---	V-NX---3R-AA---	V-NX---3R-AA---	VpNS---XR-AA---	VpNS---XR-AA---	0	1	1	1	1	1	1							1	1	1	1	1	1	1	1	1	1	0	0							1	1	1	1	0	0	1	1	1	1
v	Eu6	RR--6----------	RR--6-----------	RR--6-----------	RR--6-----------	RR--6-----------	RR--6----------	RR--6----------	0	1	1	1	1	1	1	1	1	1	1	1	1													1	1	1	1	1	1
neposlednom	AAis6x	AAIS6----1-----	CxIS6----------	CxIS6----------	AAIS6----1-----	AAIS6----1-----	AAIS6----1N----	AAIS6----1N----	0	0	0	1	1	1	1	0	0	1	1	1	1	1	1	1	1	1	1	1	1	1	1	1	1	1	1	1	1	1	1
rade	SSis6	NNIS6----------	NNIS6----------	NNIS6----------	NNIS6----------	NNIS6----------	NNIS6-----A----	NNIS6-----A----	0	1	1	1	1	1	1	1	1	1	1	1	1	1	1	1	1	1	1	1	1	1	1	1	1	1	1	1	1	1	1
v	Eu6	RR--6----------	RR--6-----------	RR--6-----------	RR--6-----------	RR--6-----------	RR--6----------	RR--6----------	0	1	1	1	1	1	1	1	1	1	1	1	1													1	1	1	1	1	1
Mostoch	SSip6:r	NNIP6----------	NNIP6----------	NNIP6----------	NNIP6----------	NNIP6----------	NNIP6-----A----	NNIP6-----A----	0	1	1	1	1	1	1	1	1	1	1	1	1	1	1	1	1	1	1	1	1	1	1	1	1	1	1	1	1	1	1
mnoho	NUns4	CxNS4----------	CxNS4----------	CxNS4----------	CxNS4----------	CxNS4----------	Ca--X----------	Ca--X----------	0	1	1	1	1	1	1	1	1	1	1	0	0	1	1	1	1			1	1	1	1			1	1	1	1	0	0
krásnych	AAip2x	AAIP2----1-----	AAIP2----1-----	AAIP2----1-----	AAIP2----1-----	AAIP2----1-----	AAIP2----1A----	AAIP2----1A----	0	1	1	1	1	1	1	1	1	1	1	1	1	1	1	1	1	1	1	1	1	1	1	1	1	1	1	1	1	1	1
vzletných	AAip2x	AAIP2----1-----	AAIP2----1-----	AAIP2----1-----	AAIP2----1-----	AAIP2----1-----	AAIP2----1A----	AAIP2----1A----	0	1	1	1	1	1	1	1	1	1	1	1	1	1	1	1	1	1	1	1	1	1	1	1	1	1	1	1	1	1	1
výkladov	SSip2	NNIP2----------	NNIP2----------	NNIP2----------	NNIP2----------	NNIP2----------	NNIP2-----A----	NNIP2-----A----	0	1	1	1	1	1	1	1	1	1	1	1	1	1	1	1	1	1	1	1	1	1	1	1	1	1	1	1	1	1	1
prečo	PD	PY-------------	PY-------------	PY-------------	PY-------------	PY-------------	PY-------------	PY-------------	0	1	1	1	1	1	1	1	1	1	1	1	1
treba	Dx	Db-------1-----	Db-------1-----	Db-------1-----	Db-------1-----	Db-------1-----	Dg-------1A----	Dg-------1A----	0	1	1	1	1	1	1	1	1	1	1	0	0
voliť	VIe+	Vf--------AA---	Vf--------AA---	Vf--------AA---	Vf--------AA---	Vf--------AA---	Vf--------A----	Vf--------A----	0	1	1	1	1	1	1	1	1	1	1	1	1
Martina	SSms4:r	NNMS4----------	NNMS4----------	NNMS4----------	NNMS4----------	NNMS4----------	NNMS4-----A----	NNMS4-----A----	0	1	1	1	1	1	1	1	1	1	1	1	1	1	1	1	1	1	1	1	1	1	1	1	1	1	1	1	1	1	1
Bútoru	SSms4:r	NNMS4----------	NNMS4----------	NNMS4----------	NNMS4----------	NNMS4----------	NNMXX-----A----	X@-------------	0	1	1	1	1	1	0	1	1	1	1	1	0	1	1	1	1	1		1	1	1	1	0		1	1	1	1	0
Takže	T	TT-------------	TT-------------	TT-------------	TT-------------	TT-------------	J,-------------	J,-------------	0	1	1	1	1	0	0	1	1	1	1	0	0
teraz	Dx	Db-------1-----	Db-------1-----	Db-------1-----	Db-------1-----	Db-------1-----	Db-------------	Db-------------	0	1	1	1	1	1	1	1	1	1	1	1	1
veľmi	Dx	Db-------1-----	Db-------1-----	Db-------1-----	Db-------1-----	Db-------1-----	Db-------------	Db-------------	0	1	1	1	1	1	1	1	1	1	1	1	1
čakám	VKesa+	VB-S---1P-AA---	V--S---1P-AA---	V--S---1P-AA---	V--S---1P-AA---	V--S---1P-AA---	VB-S---1P-AA---	VB-S---1P-AA---	0	1	1	1	1	1	1					1	1							1	1	1	1	1	1							1	1	1	1	1	1	1	1	1	1
či	O	J^-------------	J^-------------	J^-------------	J^-------------	J^-------------	J,-------------	J,-------------	0	1	1	1	1	1	1	1	1	1	1	0	0
niekto	PFms1	PDMS1----------	PDMS1----------	PDMS1----------	PDMS1----------	PDMS1----------	PZM-1----------	PZM-1----------	0	1	1	1	1	1	1	1	1	1	1	0	0	1	1	1	1	1	1	1	1	1	1			1	1	1	1	1	1
z	Eu2	RR--2----------	RR--2-----------	RR--2-----------	RR--2-----------	RR--2-----------	RR--2----------	RR--2----------	0	1	1	1	1	1	1	1	1	1	1	1	1													1	1	1	1	1	1
mienkotvorných	AAfp2x	AAFP2----1-----	AAFP2----1-----	AAFP2----1-----	AAFP2----1-----	AAFP2----1-----	AAFP2----1A----	AAFP2----1A----	0	1	1	1	1	1	1	1	1	1	1	1	1	1	1	1	1	1	1	1	1	1	1	1	1	1	1	1	1	1	1
hláv	SSfp2	NNFP2----------	NNFP2----------	NNFP2----------	NNFP2----------	NNFP2----------	NNFP2-----A----	NNFP2-----A----	0	1	1	1	1	1	1	1	1	1	1	1	1	1	1	1	1	1	1	1	1	1	1	1	1	1	1	1	1	1	1
Bútorovho	AFis2x:r	AUIS2----1-----	AUIS2----1-----	AUIS2----1-----	AUIS2----1-----	AUIS2----1-----	NNNS1-----A----	X@-------------	0	1	1	1	1	0	0	1	1	1	1	0	0	1	1	1	1	0		1	1	1	1	1		1	1	1	1	0
elektorátu	SSis2	NNIS2----------	NNIS2----------	NNIS2----------	NNIS2----------	NNIS2----------	Db-------------	X@-------------	0	1	1	1	1	0	0	1	1	1	1	0	0	1	1	1	1			1	1	1	1			1	1	1	1
urobí	VKdsc+	VB-S---3P-AN---	V--S---3P-AN---	V--S---3P-AN---	V--S---3P-AN---	V--S---3P-AN---	VB-S---3P-AA---	VB-S---3P-AA---	0	1	1	1	1	1	1					1	1							1	1	1	1	1	1							1	1	1	1	1	1	1	1	1	1
sebakritickú	AAfs4x	AAFS4----1-----	AAFS4----1-----	AAFS4----1-----	AAFS4----1-----	AAFS4----1-----	AAFS4----1A----	AAFS4----1A----	0	1	1	1	1	1	1	1	1	1	1	1	1	1	1	1	1	1	1	1	1	1	1	1	1	1	1	1	1	1	1
analýzu	SSfs4	NNFS4----------	NNFS4----------	NNFS4----------	NNFS4----------	NNFS4----------	NNFS4-----A----	NNFS4-----A----	0	1	1	1	1	1	1	1	1	1	1	1	1	1	1	1	1	1	1	1	1	1	1	1	1	1	1	1	1	1	1
tohto	PFis2	PDIS2----------	PDIS2----------	PDIS2----------	PDIS2----------	PDIS2----------	PDIS2----------	PDIS2----------	0	1	1	1	1	1	1	1	1	1	1	1	1	1	1	1	1	1	1	1	1	1	1	1	1	1	1	1	1	1	1
svojho	PFis2	PDIS2----------	PDIS2----------	PDIS2----------	PDIS2----------	PDIS2----------	P8IS2----------	P8IS2----------	0	1	1	1	1	1	1	1	1	1	1	0	0	1	1	1	1	1	1	1	1	1	1	1	1	1	1	1	1	1	1
fatálneho	AAis2x	AAIS2----1-----	AAIS2----1-----	AAIS2----1-----	AAIS2----1-----	AAIS2----1-----	AAIS2----1A----	AAIS2----1A----	0	1	1	1	1	1	1	1	1	1	1	1	1	1	1	1	1	1	1	1	1	1	1	1	1	1	1	1	1	1	1
politického	AAis2x	AAIS2----1-----	AAIS2----1-----	AAIS2----1-----	AAIS2----1-----	AAIS2----1-----	AAIS2----1A----	AAIS2----1A----	0	1	1	1	1	1	1	1	1	1	1	1	1	1	1	1	1	1	1	1	1	1	1	1	1	1	1	1	1	1	1
omylu	SSis2	NNIS2----------	NNIS2----------	NNIS2----------	NNIS2----------	NNIS2----------	NNIS2-----A----	NNIS2-----A----	0	1	1	1	1	1	1	1	1	1	1	1	1	1	1	1	1	1	1	1	1	1	1	1	1	1	1	1	1	1	1
Že	O	J^-------------	J^-------------	J^-------------	J^-------------	J^-------------	J,-------------	J,-------------	0	1	1	1	1	1	1	1	1	1	1	0	0
Mečiar	SSms1:r	NNMS1----------	NNMS1----------	NNMS1----------	NNMS1----------	NNMS1----------	NNMS1-----A----	NNMS1-----A----	0	1	1	1	1	1	1	1	1	1	1	1	1	1	1	1	1	1	1	1	1	1	1	1	1	1	1	1	1	1	1
suverénny	AAms1x	AAMS1----1-----	AAMS1----1-----	AAMS1----1-----	AAMS1----1-----	AAMS1----1-----	AAMS1----1A----	AAMS1----1A----	0	1	1	1	1	1	1	1	1	1	1	1	1	1	1	1	1	1	1	1	1	1	1	1	1	1	1	1	1	1	1
víťaz	SSms1	NNMS1----------	NNMS1----------	NNMS1----------	NNMS1----------	NNMS1----------	NNMS1-----A----	NNMS1-----A----	0	1	1	1	1	1	1	1	1	1	1	1	1	1	1	1	1	1	1	1	1	1	1	1	1	1	1	1	1	1	1
prvého	NAns2	CxNS2----------	CxNS2----------	CxNS2----------	CxNS2----------	CxNS2----------	CrNS2----------	CrNS2----------	0	1	1	1	1	1	1	1	1	1	1	0	0	1	1	1	1	1	1	1	1	1	1	1	1	1	1	1	1	1	1
kola	SSns2	NNNS2----------	NNNS2----------	NNNS2----------	NNNS2----------	NNNS2----------	NNNS2-----A----	NNNS2-----A----	0	1	1	1	1	1	1	1	1	1	1	1	1	1	1	1	1	1	1	1	1	1	1	1	1	1	1	1	1	1	1
v	Eu6	RR--6----------	RR--6-----------	RR--6-----------	RR--6-----------	RR--6-----------	RR--6----------	RR--6----------	0	1	1	1	1	1	1	1	1	1	1	1	1													1	1	1	1	1	1
druhom	NAns6	CxNS6----------	CxNS6----------	CxNS6----------	CxNS6----------	CxNS6----------	CrNS6----------	CrNS6----------	0	1	1	1	1	1	1	1	1	1	1	0	0	1	1	1	1	1	1	1	1	1	1	1	1	1	1	1	1	1	1
kole	SSns6	NNNS6----------	NNNS6----------	NNNS6----------	NNNS6----------	NNNS6----------	NNNS6-----A----	NNNS6-----A----	0	1	1	1	1	1	1	1	1	1	1	1	1	1	1	1	1	1	1	1	1	1	1	1	1	1	1	1	1	1	1
bol	VLescm+	V-MS---3R-AA---	V-MS---3R-AA---	V-MS---3R-AA---	V-MS---3R-AA---	V-IS---3R-AA---	VpYS---XR-AA---	VpYS---XR-AA---	0	1	1	1	1	1	1							1	1	1	0	0	0	1	1	1	1	1	1							1	1	1	1	0	0	1	1	1	1
spektakulárne	Dx	Db-------1-----	Db-------1-----	Db-------1-----	Db-------1-----	Db-------1-----	NNMS1-----A----	X@-------------	0	1	1	1	1	0	0	1	1	1	1	0	0
odmietnutý	Gtms1x	Db-------1-----	Db-------1-----	Db-------1-----	Db-------1-----	Db-------1-----	VsIS---XX-AP---	VsIS---XX-AP---	0	1	1	1	1	0	0	1	1	1	1	0	0
je	VKesc+	VB-S---3P-AA---	V--S---3P-AA---	V--S---3P-AA---	V--S---3P-AA---	V--S---3P-AA---	VB-S---3P-AA---	VB-S---3P-AA---	0	1	1	1	1	1	1					1	1							1	1	1	1	1	1							1	1	1	1	1	1	1	1	1	1
spravodlivý	AAis1x	AAIS1----1-----	AAIS1----1-----	AAIS1----1-----	AAIS1----1-----	AAIS1----1-----	AAIS1----1A----	AAIS1----1A----	0	1	1	1	1	1	1	1	1	1	1	1	1	1	1	1	1	1	1	1	1	1	1	1	1	1	1	1	1	1	1
trest	SSis1	NNIS1----------	NNIS1----------	NNIS1----------	NNIS1----------	NNIS1----------	NNIS1-----A----	NNIS1-----A----	0	1	1	1	1	1	1	1	1	1	1	1	1	1	1	1	1	1	1	1	1	1	1	1	1	1	1	1	1	1	1
za	Eu4	RR--4----------	RR--4-----------	RR--4-----------	RR--4-----------	RR--4-----------	RR--4----------	RR--4----------	0	1	1	1	1	1	1	1	1	1	1	1	1													1	1	1	1	1	1
roky	SSip4	NNIP4----------	NNIP4----------	NNIP4----------	NNIP4----------	NNIP4----------	NNIP4-----A----	NNIP4-----A----	0	1	1	1	1	1	1	1	1	1	1	1	1	1	1	1	1	1	1	1	1	1	1	1	1	1	1	1	1	1	1
jeho	PUns2	PZNS2----------	PZNS2----------	PZNS2----------	PZNS2----------	PZNS2----------	PSXXXIS3-------	PSXXXIS3-------	0	1	1	1	1	1	1	1	1	1	1	0	0	1	1	1	1	0	0	1	1	1	1	0	0	1	1	1	1	0	0
vládnutia	SSns2	NNNS2----------	NNNS2----------	NNNS2----------	NNNS2----------	NNNS2----------	NNNS2-----A----	NNNS2-----A----	0	1	1	1	1	1	1	1	1	1	1	1	1	1	1	1	1	1	1	1	1	1	1	1	1	1	1	1	1	1	1
Ľubomír	SSms1:r	NNMS1----------	NNMS1----------	NNMS1----------	NNMS1----------	NNMS1----------	NNMS1-----A----	NNMS1-----A----	0	1	1	1	1	1	1	1	1	1	1	1	1	1	1	1	1	1	1	1	1	1	1	1	1	1	1	1	1	1	1
Ďurovič	SSms1:r	NNMS1----------	NNMS1----------	NNMS1----------	NNMS1----------	NNMS1----------	NNMS1-----A----	X@-------------	0	1	1	1	1	1	0	1	1	1	1	1	0	1	1	1	1	1		1	1	1	1	1		1	1	1	1	1
profesor	SSms1	NNMS1----------	NNMS1----------	NNMS1----------	NNMS1----------	NNMS1----------	NNMS1-----A----	NNMS1-----A----	0	1	1	1	1	1	1	1	1	1	1	1	1	1	1	1	1	1	1	1	1	1	1	1	1	1	1	1	1	1	1
emeritus	%	NNMS1----------	NNMS1----------	NNMS1----------	NNMS1----------	NNMS1----------	NNIS7-----A----	X@-------------	0	1	1	1	1	1	0	1	1	1	1	1	0	1	1	1	1	0		1	1	1	1	1		1	1	1	1	0
slovanských	AAip2x	AAIP2----1-----	AAIP2----1-----	AAIP2----1-----	AAIP2----1-----	AAIP2----1-----	AAIP2----1A----	AAIP2----1A----	0	1	1	1	1	1	1	1	1	1	1	1	1	1	1	1	1	1	1	1	1	1	1	1	1	1	1	1	1	1	1
jazykov	SSip2	NNIP2----------	NNIP2----------	NNIP2----------	NNIP2----------	NNIP2----------	NNIP2-----A----	NNIP2-----A----	0	1	1	1	1	1	1	1	1	1	1	1	1	1	1	1	1	1	1	1	1	1	1	1	1	1	1	1	1	1	1
Scenár	SSis1	NNIS1----------	NNIS1----------	NNIS1----------	NNIS1----------	NNIS1----------	NNIS1-----A----	NNIS1-----A----	0	1	1	1	1	1	1	1	1	1	1	1	1	1	1	1	1	1	1	1	1	1	1	1	1	1	1	1	1	1	1
Adam	SSms1:r	NNMS1----------	NNMS1----------	NNMS1----------	NNMS1----------	NNMS1----------	NNMS1-----A----	NNMS1-----A----	0	1	1	1	1	1	1	1	1	1	1	1	1	1	1	1	1	1	1	1	1	1	1	1	1	1	1	1	1	1	1
Rifkin	SSms1:r	NNMS1----------	NNMS1----------	NNMS1----------	NNMS1----------	NNMS1----------	NNMS1-----A----	X@-------------	0	1	1	1	1	1	0	1	1	1	1	1	0	1	1	1	1	1		1	1	1	1	1		1	1	1	1	1
Gavin	SSms1:r	NNMS1----------	NNMS1----------	NNMS1----------	NNMS1----------	NNMS1----------	NNMS1-----A----	X@-------------	0	1	1	1	1	1	0	1	1	1	1	1	0	1	1	1	1	1		1	1	1	1	1		1	1	1	1	1
Scott	SSms1:r	NNMS1----------	NNMS1----------	NNMS1----------	NNMS1----------	NNMS1----------	NNMS1-----A----	X@-------------	0	1	1	1	1	1	0	1	1	1	1	1	0	1	1	1	1	1		1	1	1	1	1		1	1	1	1	1
Réžia	SSfs1	NNFS1----------	NNMS1----------	NNFS1----------	NNFS1----------	NNFS1----------	NNFS1-----A----	NNFS1-----A----	0	1	1	1	1	1	1	1	1	1	1	1	1	0	1	1	1	1	1	1	1	1	1	1	1	1	1	1	1	1	1
Joe	SSms1:r	NNMS1----------	NNMS1----------	NNMS1----------	NNMS1----------	NNMS1----------	NNMXX-----A----	X@-------------	0	1	1	1	1	1	0	1	1	1	1	1	0	1	1	1	1	1		1	1	1	1	0		1	1	1	1	0
Dante	SFms1:r	NxMS1----------	NxMS1----------	NxMS1----------	NNMS1----------	NxMS1----------	NNFXX-----A----	X@-------------	0	1	1	1	1	1	0	1	1	0	1	0	0	1	1	1	1	0		1	1	1	1	0		1	1	1	1	0
Kamera	SSfs1	NNFS1----------	NNFS1----------	NNFS1----------	NNFS1----------	NNFS1----------	NNFS1-----A----	NNFS1-----A----	0	1	1	1	1	1	1	1	1	1	1	1	1	1	1	1	1	1	1	1	1	1	1	1	1	1	1	1	1	1	1
Jamie	SFms1:r	NxMS1----------	NxMS1----------	NxMS1----------	NNMS1----------	NxMS1----------	NNFS1-----A----	X@-------------	0	1	1	1	1	1	0	1	1	0	1	0	0	1	1	1	1	0		1	1	1	1	1		1	1	1	1	1
Anderson	SSms1:r	NNMS1----------	NNMS1----------	NNMS1----------	NNMS1----------	NNMS1----------	NNMS1-----A----	X@-------------	0	1	1	1	1	1	0	1	1	1	1	1	0	1	1	1	1	1		1	1	1	1	1		1	1	1	1	1
Hudba	SSfs1	NNFS1----------	NNMS1----------	NNFS1----------	NNFS1----------	NNFS1----------	NNFS1-----A----	NNFS1-----A----	0	1	1	1	1	1	1	1	1	1	1	1	1	0	1	1	1	1	1	1	1	1	1	1	1	1	1	1	1	1	1
Jerry	SFms1:r	NxMS1----------	NxMS1----------	NxMS1----------	NNMS1----------	NxMS1----------	NNMS1-----A----	X@-------------	0	1	1	1	1	1	0	1	1	0	1	0	0	1	1	1	1	1		1	1	1	1	1		1	1	1	1	1
Goldsmith	SSms1:r	NNMS1----------	NxMS1----------	NNMS1----------	NNMS1----------	NNMS1----------	NNMS1-----A----	X@-------------	0	1	1	1	1	1	0	0	1	1	1	1	0	1	1	1	1	1		1	1	1	1	1		1	1	1	1	1
DOLBY	%	NNMS1----------	NxMS1----------	NNMS1----------	NNMS1----------	NNMS1----------	AAXXX----1A----	NNIXX-----A----	0	1	1	1	1	0	1	0	1	1	1	0	1	1	1	1	1	0	0	1	1	1	1	0	0	1	1	1	1	0	0
STERO	%	NNMS1----------	NxMS1----------	NNMS1----------	NxMS1----------	NNMS1----------	NNXXX-----A---8	X@-------------	0	1	1	1	1	1	0	0	1	0	1	1	0	1	1	1	1	0		1	1	1	1	0		1	1	1	1	0
Gil	SSms1:r	NNMS1----------	NNMS1----------	NNMS1----------	NNMS1----------	NNMS1----------	NNMS1-----A----	X@-------------	0	1	1	1	1	1	0	1	1	1	1	1	0	1	1	1	1	1		1	1	1	1	1		1	1	1	1	1
Mars	SSms1:r	NNMS1----------	NNMS1----------	NNMS1----------	NNMS1----------	NNMS1----------	NNIS1-----A----	NNIS1-----A----	0	1	1	1	1	1	1	1	1	1	1	1	1	1	1	1	1	0	0	1	1	1	1	1	1	1	1	1	1	1	1
najbohatší	AAms1z	AAMS1----3-----	AAMS1----3-----	AAMS1----3-----	AAMS1----3-----	AAMS1----3-----	AAMS1----3A----	AAMS1----3A----	0	1	1	1	1	1	1	1	1	1	1	1	1	1	1	1	1	1	1	1	1	1	1	1	1	1	1	1	1	1	1
muž	SSms1	NNMS1----------	NNMS1----------	NNMS1----------	NNMS1----------	NNMS1----------	NNMS1-----A----	NNMS1-----A----	0	1	1	1	1	1	1	1	1	1	1	1	1	1	1	1	1	1	1	1	1	1	1	1	1	1	1	1	1	1	1
sveta	SSis2	NNIS2----------	NNIS2----------	NNIS2----------	NNIS2----------	NNIS2----------	NNIS2-----A----	NNIS2-----A----	0	1	1	1	1	1	1	1	1	1	1	1	1	1	1	1	1	1	1	1	1	1	1	1	1	1	1	1	1	1	1
je	VKesc+	VB-S---3P-AA---	V--S---3P-AA---	V--S---3P-AA---	V--S---3P-AA---	V--S---3P-AA---	VB-S---3P-AA---	VB-S---3P-AA---	0	1	1	1	1	1	1					1	1							1	1	1	1	1	1							1	1	1	1	1	1	1	1	1	1
majiteľom	SSms7	NNMS7----------	NNMS7----------	NNMS7----------	NNMS7----------	NNMS7----------	NNMS7-----A----	NNMS7-----A----	0	1	1	1	1	1	1	1	1	1	1	1	1	1	1	1	1	1	1	1	1	1	1	1	1	1	1	1	1	1	1
počítačovej	AAfs2x	AAFS2----1-----	AAFS2----1-----	AAFS2----1-----	AAFS2----1-----	AAFS2----1-----	AAFS2----1A----	AAFS2----1A----	0	1	1	1	1	1	1	1	1	1	1	1	1	1	1	1	1	1	1	1	1	1	1	1	1	1	1	1	1	1	1
spoločnosti	SSfs2	NNFS2----------	NNFS2----------	NNFS2----------	NNFS2----------	NNFS2----------	NNFS2-----A----	NNFS2-----A----	0	1	1	1	1	1	1	1	1	1	1	1	1	1	1	1	1	1	1	1	1	1	1	1	1	1	1	1	1	1	1
MarsTech	W	NNFS2----------	NNIS1----------	NNFS2----------	NNFS2----------	NNFS2----------	NNIS1-----A----	X@-------------	0	1	1	1	1	1	0	1	1	1	1	1	0	0	1	1	1	0		1	1	1	1	1		0	1	1	1	0
ktorá	PAfs1	P4FS1----------	P4FS1----------	P4FS1----------	P4FS1----------	P4FS1----------	P4FS1----------	P4FS1----------	0	1	1	1	1	1	1	1	1	1	1	1	1	1	1	1	1	1	1	1	1	1	1	1	1	1	1	1	1	1	1
vyrába	VKesc+	VB-S---3P-AA---	V--S---3P-AA---	V--S---3P-AA---	V--S---3P-AA---	V--S---3P-AA---	VB-S---3P-AA---	VB-S---3P-AA---	0	1	1	1	1	1	1					1	1							1	1	1	1	1	1							1	1	1	1	1	1	1	1	1	1
aj	T	TT-------------	TT-------------	TT-------------	TT-------------	TT-------------	J^-------------	J^-------------	0	1	1	1	1	0	0	1	1	1	1	0	0
hračky	SSfp4	NNFP4----------	NNFP4----------	NNFP4----------	NNFP4----------	NNFP4----------	NNFP4-----A----	NNFP4-----A----	0	1	1	1	1	1	1	1	1	1	1	1	1	1	1	1	1	1	1	1	1	1	1	1	1	1	1	1	1	1	1
pre	Eu4	RR--4----------	RR--4-----------	RR--4-----------	RR--4-----------	RR--4-----------	RR--4----------	RR--4----------	0	1	1	1	1	1	1	1	1	1	1	1	1													1	1	1	1	1	1
deti	SSnp4	NNNP4----------	NNNP4----------	NNNP4----------	NNNP4----------	NNNP4----------	NNNP4-----A----	NNNP4-----A----	0	1	1	1	1	1	1	1	1	1	1	1	1	1	1	1	1	1	1	1	1	1	1	1	1	1	1	1	1	1	1
tretieho	NAns2	CxNS2----------	CxNS2----------	CxNS2----------	CxNS2----------	CxNS2----------	CrNS2----------	CrNS2----------	0	1	1	1	1	1	1	1	1	1	1	0	0	1	1	1	1	1	1	1	1	1	1	1	1	1	1	1	1	1	1
tisícročia	SSns2	NNNS2----------	NNNS2----------	NNNS2----------	NNNS2----------	NNNS2----------	NNNS2-----A----	NNNS2-----A----	0	1	1	1	1	1	1	1	1	1	1	1	1	1	1	1	1	1	1	1	1	1	1	1	1	1	1	1	1	1	1
Dnes	Dx	Db-------1-----	Db-------1-----	Db-------1-----	Db-------1-----	Db-------1-----	Db-------------	Db-------------	0	1	1	1	1	1	1	1	1	1	1	1	1
je	VKesc+	VB-S---3P-AA---	V--S---3P-AA---	V--S---3P-AA---	V--S---3P-AA---	V--S---3P-AA---	VB-S---3P-AA---	VB-S---3P-AA---	0	1	1	1	1	1	1					1	1							1	1	1	1	1	1							1	1	1	1	1	1	1	1	1	1
autogramiáda	SSfs1	NNFS1----------	NNFS1----------	NNFS1----------	NNFS1----------	NNFS1----------	NNFS1-----A----	NNFS1-----A----	0	1	1	1	1	1	1	1	1	1	1	1	1	1	1	1	1	1	1	1	1	1	1	1	1	1	1	1	1	1	1
Ivy	SSfs2:r	NNFS2----------	NNFS2----------	NNFS2----------	NNFS2----------	NNFS2----------	NNFS2-----A----	NNFS2-----A----	0	1	1	1	1	1	1	1	1	1	1	1	1	1	1	1	1	1	1	1	1	1	1	1	1	1	1	1	1	1	1
Janžurovej	SAfs2:r	NxFS2----------	NxFS2----------	NxFS2----------	AUFS2----1-----	NxFS2----------	NNMS2-----A----	X@-------------	0	1	1	0	1	1	0	1	1	0	1	0	0	1	1	1	1	0		1	1	1	1	1		1	1	1	1	1
a	O	J^-------------	J^-------------	J^-------------	J^-------------	J^-------------	J^-------------	J^-------------	0	1	1	1	1	1	1	1	1	1	1	1	1
Markéty	SSfs2:r	NNFS2----------	NNFS2----------	NNFS2----------	NNFS2----------	NNFS2----------	NNMS2-----A----	X@-------------	0	1	1	1	1	1	0	1	1	1	1	1	0	1	1	1	1	0		1	1	1	1	1		1	1	1	1	1
Hrubešovej	SAfs2:r	NxFS2----------	NxFS2----------	NxFS2----------	NxFS2----------	NxFS2----------	NNMS2-----A----	X@-------------	0	1	1	1	1	1	0	1	1	1	1	0	0	1	1	1	1	0		1	1	1	1	1		1	1	1	1	1
a	O	J^-------------	J^-------------	J^-------------	J^-------------	J^-------------	J^-------------	J^-------------	0	1	1	1	1	1	1	1	1	1	1	1	1
potom	Dx	Db-------1-----	Db-------1-----	Db-------1-----	Db-------1-----	Db-------1-----	Db-------------	Db-------------	0	1	1	1	1	1	1	1	1	1	1	1	1
je	VKesc+	VB-S---3P-AA---	V--S---3P-AA---	V--S---3P-AA---	V--S---3P-AA---	V--S---3P-AA---	VB-S---3P-AA---	VB-S---3P-AA---	0	1	1	1	1	1	1					1	1							1	1	1	1	1	1							1	1	1	1	1	1	1	1	1	1
tlačová	AAfs1x	AAFS1----1-----	AAFS1----1-----	AAFS1----1-----	AAFS1----1-----	AAFS1----1-----	AAFS1----1A----	AAFS1----1A----	0	1	1	1	1	1	1	1	1	1	1	1	1	1	1	1	1	1	1	1	1	1	1	1	1	1	1	1	1	1	1
konferencia	SSfs1	NNFS1----------	NNFS1----------	NNFS1----------	NNFS1----------	NNFS1----------	NNFS1-----A----	NNFS1-----A----	0	1	1	1	1	1	1	1	1	1	1	1	1	1	1	1	1	1	1	1	1	1	1	1	1	1	1	1	1	1	1
Paulom	SSms7:r	NNMS7----------	NNMS7----------	NNMS7----------	NNMS7----------	NNMS7----------	NNMS7-----A----	NNMS7-----A----	0	1	1	1	1	1	1	1	1	1	1	1	1	1	1	1	1	1	1	1	1	1	1	1	1	1	1	1	1	1	1
Morrisseyom	SSms7:r	NNMS7----------	NNMS7----------	NNMS7----------	NNMS7----------	NNMS7----------	NNMS7-----A----	X@-------------	0	1	1	1	1	1	0	1	1	1	1	1	0	1	1	1	1	1		1	1	1	1	1		1	1	1	1	1
Večer	Dx	Db-------1-----	Db-------1-----	Db-------1-----	Db-------1-----	Db-------1-----	NNIS4-----A----	NNIS1-----A----	0	1	1	1	1	0	0	1	1	1	1	0	0
bude	VBesc+	VB-S---3F-AA---	V--S---3F-AA---	V--S---3F-AA---	V--S---3F-AA---	V--S---3F-AA---	VB-S---3F-AA---	VB-S---3F-AA---	0	1	1	1	1	1	1					1	1							1	1	1	1	1	1							1	1	1	1	1	1	1	1	1	1
Lauren	SUfs1:r	NxFS1----------	NxFS1----------	NxFS1----------	NxFS1----------	NxFS1----------	NNMS1-----A----	X@-------------	0	1	1	1	1	1	0	1	1	1	1	0	0	1	1	1	1	0		1	1	1	1	1		1	1	1	1	1
Bacall	SUfs1:r	NxFS1----------	NxFS1----------	NxFS1----------	NxFS1----------	NxFS1----------	NNMS1-----A----	X@-------------	0	1	1	1	1	1	0	1	1	1	1	0	0	1	1	1	1	0		1	1	1	1	1		1	1	1	1	1
uvádzať	VIe+	Vf--------AA---	Vf--------AA---	Vf--------AA---	Vf--------AA---	Vf--------AA---	Vf--------A----	Vf--------A----	0	1	1	1	1	1	1	1	1	1	1	1	1
film	SSis4	NNIS4----------	NNIS4----------	NNIS4----------	NNIS4----------	NNIS4----------	NNIS4-----A----	NNIS4-----A----	0	1	1	1	1	1	1	1	1	1	1	1	1	1	1	1	1	1	1	1	1	1	1	1	1	1	1	1	1	1	1
Hlboký	AAis1x:r	AAIS1----1-----	AAIS1----1-----	AAIS1----1-----	AUIS1----1-----	AAIS1----1-----	AAIS4----1A----	AAIS4----1A----	0	1	1	1	1	1	1	1	1	0	1	1	1	1	1	1	1	1	1	1	1	1	1	1	1	1	1	1	1	0	0
spánok	SSis1	NNIS1----------	NNIS1----------	NNIS1----------	NNIS1----------	NNIS1----------	NNIS4-----A----	NNIS4-----A----	0	1	1	1	1	1	1	1	1	1	1	1	1	1	1	1	1	1	1	1	1	1	1	1	1	1	1	1	1	0	0
Napokon	Dx	Db-------1-----	Db-------1-----	Db-------1-----	Db-------1-----	Db-------1-----	Db-------------	Db-------------	0	1	1	1	1	1	1	1	1	1	1	1	1
zvíťazila	VLdscf+	V-FS---3R-AN---	V-FS---3R-AN---	V-FS---3R-AN---	V-FS---3R-AN---	V-FS---3R-AN---	VpFS---XR-AA---	VpFS---XR-AA---	0	1	1	1	1	1	1							1	1	1	1	1	1	1	1	1	1	1	1							1	1	1	1	0	0	1	1	1	1
láska	SSfs1	NNFS1----------	NNFS1----------	NNFS1----------	NNFS1----------	NNFS1----------	NNFS1-----A----	NNFS1-----A----	0	1	1	1	1	1	1	1	1	1	1	1	1	1	1	1	1	1	1	1	1	1	1	1	1	1	1	1	1	1	1
Grazie	%	NNFS1----------	NNFS1----------	Z:-------------	Z:------------	NNFS1----------	NNFS1-----A----	X@-------------	0	1	0	0	1	1	0	1	0	0	1	1	0	1			1	1		1			1	1		1			1	1
all	%	NNFS1----------	NNFS1----------	Z:-------------	Z:------------	NNFS1----------	AAXXX----1A----	X@-------------	0	1	0	0	1	0	0	1	0	0	1	0	0	1			1	0		1			1	0		1			1	0
Italia	%	NNFS1----------	NNFS1----------	Z:-------------	Z:------------	NNFS1----------	NNFXX-----A----	X@-------------	0	1	0	0	1	1	0	1	0	0	1	1	0	1			1	1		1			1	0		1			1	0
Grazie	%	NNFS1----------	NNFS1----------	Z:-------------	Z:------------	NNFS1----------	NNMS1-----A----	X@-------------	0	1	0	0	1	1	0	1	0	0	1	1	0	1			1	0		1			1	1		1			1	1
all	%	NNFS1----------	NNFS1----------	Z:-------------	Z:------------	NNFS1----------	NNMS1-----A----	X@-------------	0	1	0	0	1	1	0	1	0	0	1	1	0	1			1	0		1			1	1		1			1	1
America	%	NNFS1----------	NNFS1----------	Z:-------------	Z:------------	NNFS1----------	NNMS1-----A----	X@-------------	0	1	0	0	1	1	0	1	0	0	1	1	0	1			1	0		1			1	1		1			1	1
kričal	VLescm+	V-MS---3R-AA---	V-MS---3R-AA---	V-MS---3R-AA---	V-MS---3R-AA---	V-MS---3R-AA---	VpYS---XR-AA---	VpYS---XR-AA---	0	1	1	1	1	1	1							1	1	1	1	0	0	1	1	1	1	1	1							1	1	1	1	0	0	1	1	1	1
z	Eu2	RR--2----------	RR--2-----------	RR--2-----------	RR--2-----------	RR--2-----------	RR--2----------	RR--2----------	0	1	1	1	1	1	1	1	1	1	1	1	1													1	1	1	1	1	1
pódia	SSns2	NNNS2----------	NNNS2----------	NNNS2----------	NNNS2----------	NNNS2----------	NNNS2-----A----	NNNS2-----A----	0	1	1	1	1	1	1	1	1	1	1	1	1	1	1	1	1	1	1	1	1	1	1	1	1	1	1	1	1	1	1
nadšený	AAms1x	AAMS1----1-----	AAMS1----1-----	AAMS1----1-----	AAMS1----1-----	AAMS1----1-----	AAMS1----1A----	VsIS---XX-AP---	0	1	1	1	1	1	0	1	1	1	1	1	0	1	1	1	1	1	0	1	1	1	1	1	1	1	1	1	1	1
Benigni	SFms1:r	NxMS1----------	NxMS1----------	NxMS1----------	NNMS1----------	NxMS1----------	NNMS1-----A----	X@-------------	0	1	1	1	1	1	0	1	1	0	1	0	0	1	1	1	1	1		1	1	1	1	1		1	1	1	1	1
Uvidíme	VKdpa+	VB-P---1P-AN---	V--P---1P-AN---	V--P---1P-AN---	V--P---1P-AN---	V--P---1P-AN---	VB-P---1P-AA---	VB-P---1P-AA---	0	1	1	1	1	1	1					1	1							1	1	1	1	1	1							1	1	1	1	1	1	1	1	1	1
ako	O	J^-------------	J^-------------	J^-------------	J^-------------	PY-------------	Db-------------	Db-------------	0	1	1	1	0	0	0	1	1	1	0	0	0
do	PFns1:q	PDNS1----------	PDNS1----------	PDNS1----------	RR--2-----------	PDNS1----------	RR--2----------	RR--2----------	0	1	1	0	1	0	0	1	1	0	1	0	0	1	1		1			1	1		1			1	1	0	1	0	0
celé	AAns1x	AANS1----1-----	AANS1----1-----	AANS1----1-----	AANS1----1-----	AANS1----1-----	AANS4----1A----	AANS4----1A----	0	1	1	1	1	1	1	1	1	1	1	1	1	1	1	1	1	1	1	1	1	1	1	1	1	1	1	1	1	0	0
dopadne	VKdsc+	VB-S---3P-AN---	V--S---3P-AN---	V--S---3P-AN---	V--S---3P-AN---	V--S---3P-AN---	VB-S---3P-AA---	VB-S---3P-AA---	0	1	1	1	1	1	1					1	1							1	1	1	1	1	1							1	1	1	1	1	1	1	1	1	1
Pôvodný	AAis1x	AAIS1----1-----	AAIS1----1-----	AAIS1----1-----	AAIS1----1-----	AAIS1----1-----	AAIS1----1A----	AAIS1----1A----	0	1	1	1	1	1	1	1	1	1	1	1	1	1	1	1	1	1	1	1	1	1	1	1	1	1	1	1	1	1	1
scenár	SSis1	NNIS1----------	NNIS1----------	NNIS1----------	NNIS1----------	NNIS1----------	NNIS1-----A----	NNIS1-----A----	0	1	1	1	1	1	1	1	1	1	1	1	1	1	1	1	1	1	1	1	1	1	1	1	1	1	1	1	1	1	1
Zamilovaný	Gtms1x:r	NNIS1----------	NNIS1----------	NNIS1----------	Z:------------	NNIS1----------	AAIS1----1A----	AAIS1----1A----	0	1	1	0	1	0	0	1	1	0	1	0	0	1	1		1	1	1	1	1		1	1	1	1	1		1	1	1
Shakespeare	SSms1:r	NNMS1----------	NNMS1----------	NNMS1----------	Z:------------	NNMS1----------	AAXXX----1A----	X@-------------	0	1	1	0	1	0	0	1	1	0	1	0	0	1	1		1	0		1	1		1	0		1	1		1	0
Scenár	SSis1	NNIS1----------	NNMS1----------	NNIS1----------	Z:------------	NNIS1----------	NNIS1-----A----	NNIS1-----A----	0	1	1	0	1	1	1	1	1	0	1	1	1	0	1		1	1	1	1	1		1	1	1	1	1		1	1	1
adaptácia	SSfs1	NNFS1----------	NNFS1----------	NNFS1----------	NNFS1----------	NNFS1----------	NNFS1-----A----	NNFS1-----A----	0	1	1	1	1	1	1	1	1	1	1	1	1	1	1	1	1	1	1	1	1	1	1	1	1	1	1	1	1	1	1
Tenká	AAfs1x:r	AAFS1----1-----	AAFS1----1-----	AAFS1----1-----	AAFS1----1-----	AAFS1----1-----	AAFS1----1A----	AAFS1----1A----	0	1	1	1	1	1	1	1	1	1	1	1	1	1	1	1	1	1	1	1	1	1	1	1	1	1	1	1	1	1	1
červená	AAfs1x	AAFS1----1-----	AAFS1----1-----	AAFS1----1-----	AAFS1----1-----	AAFS1----1-----	AAFS1----1A----	AAFS1----1A----	0	1	1	1	1	1	1	1	1	1	1	1	1	1	1	1	1	1	1	1	1	1	1	1	1	1	1	1	1	1	1
čiara	SSfs1	NNFS1----------	NNFS1----------	NNFS1----------	NNFS1----------	NNFS1----------	NNFS1-----A----	NNFS1-----A----	0	1	1	1	1	1	1	1	1	1	1	1	1	1	1	1	1	1	1	1	1	1	1	1	1	1	1	1	1	1	1
Výprava	SSfs1	NNFS1----------	NNFS1----------	NNFS1----------	NNFS1----------	NNFS1----------	NNFS1-----A----	NNFS1-----A----	0	1	1	1	1	1	1	1	1	1	1	1	1	1	1	1	1	1	1	1	1	1	1	1	1	1	1	1	1	1	1
Zamilovaný	Gtms1x:r	NNFS1----------	NNFS1----------	NNFS1----------	Z:------------	NNFS1----------	AAMS1----1A----	AAIS1----1A----	0	1	1	0	1	0	0	1	1	0	1	0	0	1	1		1	0	0	1	1		1	1	1	1	1		1	1	1
Shakespeare	SSms1:r	NNMS1----------	NNMS1----------	NNMS1----------	NNMS1----------	NNMS1----------	NNMS1-----A----	X@-------------	0	1	1	1	1	1	0	1	1	1	1	1	0	1	1	1	1	1		1	1	1	1	1		1	1	1	1	1
Kostýmy	SSip1	NNIP1----------	NxMS1----------	NNIP1----------	NNIP1----------	NNIP1----------	NNIP1-----A----	NNIP1-----A----	0	1	1	1	1	1	1	0	1	1	1	1	1	0	1	1	1	1	1	0	1	1	1	1	1	1	1	1	1	1	1
Kráľovná	SFfs1:r	NxFS1----------	NxFS1----------	NxFS1----------	NxFS1----------	NxFS1----------	NNFS1-----A----	NNFS1-----A----	0	1	1	1	1	1	1	1	1	1	1	0	0	1	1	1	1	1	1	1	1	1	1	1	1	1	1	1	1	1	1
Alžbeta	SSfs1:r	NNFS1----------	NNFS1----------	NNFS1----------	NNFS1----------	NNFS1----------	NNFS1-----A----	NNFS1-----A----	0	1	1	1	1	1	1	1	1	1	1	1	1	1	1	1	1	1	1	1	1	1	1	1	1	1	1	1	1	1	1
Pôvodná	AAfs1x	AAFS1----1-----	AAFS1----1-----	AAFS1----1-----	AAFS1----1-----	AAFS1----1-----	AAFS1----1A----	AAFS1----1A----	0	1	1	1	1	1	1	1	1	1	1	1	1	1	1	1	1	1	1	1	1	1	1	1	1	1	1	1	1	1	1
hudba	SSfs1	NNFS1----------	NNFS1----------	NNFS1----------	NNFS1----------	NNFS1----------	NNFS1-----A----	NNFS1-----A----	0	1	1	1	1	1	1	1	1	1	1	1	1	1	1	1	1	1	1	1	1	1	1	1	1	1	1	1	1	1	1
k	Eu3	RR--3----------	RR--3-----------	RR--3-----------	RR--3-----------	RR--3-----------	RR--3----------	RR--3----------	0	1	1	1	1	1	1	1	1	1	1	1	1													1	1	1	1	1	1
muzikálu	SSis3	NNIS3----------	NNIS3----------	NNIS3----------	NNIS3----------	NNIS3----------	NNIS3-----A----	NNIS3-----A----	0	1	1	1	1	1	1	1	1	1	1	1	1	1	1	1	1	1	1	1	1	1	1	1	1	1	1	1	1	1	1
alebo	O	J^-------------	J^-------------	J^-------------	J^-------------	J^-------------	J^-------------	J^-------------	0	1	1	1	1	1	1	1	1	1	1	1	1
komédii	SSfs3	NNFS3----------	NNFS3----------	NNFS3----------	NNFS3----------	NNFS3----------	NNFS3-----A----	NNFS3-----A----	0	1	1	1	1	1	1	1	1	1	1	1	1	1	1	1	1	1	1	1	1	1	1	1	1	1	1	1	1	1	1
Princ	SSms1:r	NNMS1----------	NNMS1----------	NNMS1----------	NNMS1----------	NNMS1----------	NNMS1-----A----	NNMS1-----A----	0	1	1	1	1	1	1	1	1	1	1	1	1	1	1	1	1	1	1	1	1	1	1	1	1	1	1	1	1	1	1
egyptský	AAms1x	AAMS1----1-----	AAIS1----1-----	AAMS1----1-----	AAIS1----1-----	AAIS1----1-----	AAIS1----1A----	AAIS1----1A----	0	1	1	1	1	1	1	1	1	1	1	1	1	0	1	0	0	0	0	1	1	1	1	1	1	1	1	1	1	1	1
Krátkometrážny	AAis1x	AAIS1----1-----	AAIS1----1-----	AAIS1----1-----	AAIS1----1-----	AAIS1----1-----	AAIS1----1A----	AAIS1----1A----	0	1	1	1	1	1	1	1	1	1	1	1	1	1	1	1	1	1	1	1	1	1	1	1	1	1	1	1	1	1	1
hraný	AAis1x	AAIS1----1-----	AAIS1----1-----	AAIS1----1-----	AAIS1----1-----	AAIS1----1-----	AAIS1----1A----	AAIS1----1A----	0	1	1	1	1	1	1	1	1	1	1	1	1	1	1	1	1	1	1	1	1	1	1	1	1	1	1	1	1	1	1
film	SSis1	NNIS1----------	NNIS1----------	NNIS1----------	NNIS1----------	NNIS1----------	NNIS1-----A----	NNIS1-----A----	0	1	1	1	1	1	1	1	1	1	1	1	1	1	1	1	1	1	1	1	1	1	1	1	1	1	1	1	1	1	1
LA	%	NNIS1----------	NNIS1----------	NNIS1----------	Z:------------	NNIS1----------	AAXXX----1A----	AAFSX----1A----	0	1	1	0	1	0	0	1	1	0	1	0	0	1	1		1	0	0	1	1		1	0	1	1	1		1	0	0
CARTE	%	NNIS1----------	NNIS1----------	NNIS1----------	Z:------------	NNIS1----------	AAXXX----1A----	X@-------------	0	1	1	0	1	0	0	1	1	0	1	0	0	1	1		1	0		1	1		1	0		1	1		1	0
POSTALE	%	NNIS1----------	NNIS1----------	NNIS1----------	Z:------------	NNIS1----------	NNIP1-----A----	NNIP1-----A----	0	1	1	0	1	1	1	1	1	0	1	1	1	1	1		1	1	1	1	1		1	0	0	1	1		1	1	1
The	%	NNIS1----------	NNIS1----------	NNIS1----------	Z:------------	NNIS1----------	AAXXX----1A----	AAXXX----1A----	0	1	1	0	1	0	0	1	1	0	1	0	0	1	1		1	0	0	1	1		1	0	0	1	1		1	0	0
Postcard	%	NNIS1----------	NNIS1----------	NNIS1----------	Z:------------	NNIS1----------	NNXXX-----A----	X@-------------	0	1	1	0	1	1	0	1	1	0	1	1	0	1	1		1	0		1	1		1	0		1	1		1	0
Zvuk	SSis1	NNIS1----------	NNIS1----------	NNIS1----------	NNIS1----------	NNIS1----------	NNIS1-----A----	NNIS1-----A----	0	1	1	1	1	1	1	1	1	1	1	1	1	1	1	1	1	1	1	1	1	1	1	1	1	1	1	1	1	1	1
Zachráňte	VMdpb+:r	V--P---2--AN---	V--P---2--AN---	V--P---2--AN---	V--P---2--AN---	V--P---2--AN---	Vi-P---2--A----	Vi-P---2--A----	0	1	1	1	1	1	1													1	1	1	1	1	1							1	1	1	1	1	1
vojaka	SSms4	NNMS4----------	NNMS4----------	NNMS4----------	NNMS4----------	NNMS4----------	NNMS4-----A----	NNMS4-----A----	0	1	1	1	1	1	1	1	1	1	1	1	1	1	1	1	1	1	1	1	1	1	1	1	1	1	1	1	1	1	1
Ryana	SSms4:r	NNMS4----------	NNMS4----------	NNMS4----------	NNMS4----------	NNMS4----------	NNFS1-----A----	X@-------------	0	1	1	1	1	1	0	1	1	1	1	1	0	1	1	1	1	0		1	1	1	1	1		1	1	1	1	0
Vizuálne	AAip1x	AAIP1----1-----	AAIP4----1-----	AAIP1----1-----	AAIP4----1-----	AAIP1----1-----	AAIP4----1A----	AAIP4----1A----	0	1	1	1	1	1	1	1	1	1	1	1	1	1	1	1	1	1	1	1	1	1	1	1	1	0	1	0	1	0	0
efekty	SSip1	NNIP1----------	NNIP4----------	NNIP1----------	NNIP4----------	NNIP1----------	NNIP4-----A----	NNIP4-----A----	0	1	1	1	1	1	1	1	1	1	1	1	1	1	1	1	1	1	1	1	1	1	1	1	1	0	1	0	1	0	0
Armageddon	SSis1:r	NNIS1----------	NNIP4----------	NNIS1----------	Z:------------	NNIS1----------	NNIS1-----A----	X@-------------	0	1	1	0	1	1	0	1	1	0	1	1	0	1	1		1	1		0	1		1	1		0	1		1	1
Tento	PFis1	PDIS1----------	PDIS1----------	PDIS1----------	PDIS4----------	PDIS1----------	PDIS4----------	PDIS4----------	0	1	1	1	1	1	1	1	1	1	1	1	1	1	1	1	1	1	1	1	1	1	1	1	1	1	1	0	1	0	0
ročník	SSis1	NNIS1----------	NNIS1----------	NNIS1----------	NNIS4----------	NNIS1----------	NNIS4-----A----	NNIS4-----A----	0	1	1	1	1	1	1	1	1	1	1	1	1	1	1	1	1	1	1	1	1	1	1	1	1	1	1	0	1	0	0
priniesol	VLdsci+	V-IS---3R-AN---	V-IS---3R-AN---	V-IS---3R-AN---	V-IS---3R-AN---	V-IS---3R-AN---	VpYS---XR-AA---	VpYS---XR-AA---	0	1	1	1	1	1	1							1	1	1	1	0	0	1	1	1	1	1	1							1	1	1	1	0	0	1	1	1	1
hneď	T	TT-------------	TT-------------	TT-------------	Db-------1-----	TT-------------	Db-------------	Db-------------	0	1	1	0	1	0	0	1	1	0	1	0	0
niekoľko	PUns4	PZNS4----------	PZNS4----------	PZNS4----------	PZNS4----------	PZNS4----------	Ca--X----------	Ca--X----------	0	1	1	1	1	0	0	1	1	1	1	0	0	1	1	1	1			1	1	1	1			1	1	1	1	0	0
prekvapení	SSnp2	NNNP2----------	NNNP2----------	NNNP2----------	NNNP2----------	NNNP2----------	NNNP2-----A----	NNNP2-----A----	0	1	1	1	1	1	1	1	1	1	1	1	1	1	1	1	1	1	1	1	1	1	1	1	1	1	1	1	1	1	1
Kompletný	AAis4x	AAIS4----1-----	AAIS1----1-----	AAIS1----1-----	AAIS4----1-----	AAIS4----1-----	AAIS1----1A----	AAIS1----1A----	0	1	1	1	1	1	1	1	1	1	1	1	1	1	1	1	1	1	1	1	1	1	1	1	1	0	0	1	1	0	0
program	SSis4	NNIS4----------	NNIS1----------	NNIS1----------	NNIS4----------	NNIS4----------	NNIS1-----A----	NNIS1-----A----	0	1	1	1	1	1	1	1	1	1	1	1	1	1	1	1	1	1	1	1	1	1	1	1	1	0	0	1	1	0	0
Gay	%	C=-------------	C=-------------	Z:-------------	Z:------------	C--------------	NNMXX-----A----	NNMXX-----A----	0	1	0	0	1	0	0	1	0	0		0	0
Film	%	C=-------------	NNIS4----------	Z:-------------	Z:------------	C--------------	NNIS1-----A----	NNIS1-----A----	0	0	0	0	1	0	0	0	0	0		0	0
Festivalu	SSis2:r	NNIS2----------	NNIS2----------	NNIS2----------	NNIS2----------	NNIS2----------	NNIS2-----A----	NNIS2-----A----	0	1	1	1	1	1	1	1	1	1	1	1	1	1	1	1	1	1	1	1	1	1	1	1	1	1	1	1	1	1	1
Slovakia	SSfs1:r	NNFS1----------	NNIS2----------	NNIS2----------	NNFS1----------	NNFS1----------	XX-------------	XX-------------	0	1	1	1	1	0	0	1	1	1	1	0	0	0	0	1	1			1	1	1	1			0	0	1	1
nájdete	VKdpb+	VB-P---2P-AN---	V--P---2P-AN---	V--P---2P-AN---	V--P---2P-AN---	V--P---2P-AN---	VB-P---2P-AA---	VB-P---2P-AA---	0	1	1	1	1	1	1					1	1							1	1	1	1	1	1							1	1	1	1	1	1	1	1	1	1
na	Eu6	RR--6----------	RR--6-----------	RR--4-----------	RR--6-----------	RR--6-----------	RR--4----------	RR--4----------	0	1	1	1	1	1	1	1	1	1	1	1	1													1	0	1	1	0	0
Film	%	RR--6----------	RR--6-----------	RR--4-----------	RR--6-----------	RR--6-----------	NNIS4-----A----	NNIS4-----A----	0	1	1	1	1	0	0	1	1	1	1	0	0													1	0	1	1	0	0
Site	%	RR--6----------	RR--6-----------	RR--4-----------	RR--6-----------	RR--6-----------	NNNS6-----A----	NNNS6-----A----	0	1	1	1	1	0	0	1	1	1	1	0	0													1	0	1	1	1	1
v	Eu6	RR--6----------	RR--6-----------	RR--6-----------	RR--6-----------	RR--6-----------	RR--6----------	RR--6----------	0	1	1	1	1	1	1	1	1	1	1	1	1													1	1	1	1	1	1
rubrike	SSfs6	NNFS6----------	NNFS6----------	NNFS6----------	NNFS6----------	NNFS6----------	NNFS6-----A----	NNFS6-----A----	0	1	1	1	1	1	1	1	1	1	1	1	1	1	1	1	1	1	1	1	1	1	1	1	1	1	1	1	1	1	1
Ceny	SSfp1:r	NNFP1----------	NNFP1----------	NNFP1----------	NNFP1----------	NNFP1----------	NNFP4-----A----	NNFP4-----A----	0	1	1	1	1	1	1	1	1	1	1	1	1	1	1	1	1	1	1	1	1	1	1	1	1	1	1	1	1	0	0
a	O	J^-------------	J^-------------	J^-------------	J^-------------	J^-------------	J^-------------	J^-------------	0	1	1	1	1	1	1	1	1	1	1	1	1
festivaly	SSip1	NNIP1----------	NNIP4----------	NNIP1----------	NNIP1----------	NNIP1----------	NNIP4-----A----	NNIP4-----A----	0	1	1	1	1	1	1	1	1	1	1	1	1	1	1	1	1	1	1	1	1	1	1	1	1	0	1	1	1	0	0
Americká	AAfs1x	AAFS1----1-----	AAFS1----1-----	AAFS1----1-----	AAFS1----1-----	AAFS1----1-----	AAFS1----1A----	AAFS1----1A----	0	1	1	1	1	1	1	1	1	1	1	1	1	1	1	1	1	1	1	1	1	1	1	1	1	1	1	1	1	1	1
premiéra	SSfs1	NNFS1----------	NNFS1----------	NNFS1----------	NNFS1----------	NNFS1----------	NNFS1-----A----	NNFS1-----A----	0	1	1	1	1	1	1	1	1	1	1	1	1	1	1	1	1	1	1	1	1	1	1	1	1	1	1	1	1	1	1
bola	VLescf+	V-FS---3R-AA---	V-FS---3R-AA---	V-FS---3R-AA---	V-FS---3R-AA---	V-FS---3R-AA---	VpFS---XR-AA---	VpFS---XR-AA---	0	1	1	1	1	1	1							1	1	1	1	1	1	1	1	1	1	1	1							1	1	1	1	0	0	1	1	1	1
plánovaná	Gtfs1x	V-FS---3R-AA---	V-FS---3R-AA---	V-FS---3R-AA---	V-FS---3R-AA---	V-FS---3R-AA---	VsFS---XX-AP---	VsFS---XX-AP---	0	1	1	1	1	1	1							1	1	1	1	1	1	1	1	1	1	1	1							1	1	1	1	0	0	1	1	1	1
na	Eu4	RR--4----------	RR--4-----------	RR--4-----------	RR--4-----------	RR--4-----------	RR--4----------	RR--4----------	0	1	1	1	1	1	1	1	1	1	1	1	1													1	1	1	1	1	1
júl	SSis4	NNIS4----------	NNIS4----------	NNIS4----------	NNIS4----------	NNIS4----------	NNIS4-----A----	NNIS4-----A----	0	1	1	1	1	1	1	1	1	1	1	1	1	1	1	1	1	1	1	1	1	1	1	1	1	1	1	1	1	1	1
a	O	J^-------------	J^-------------	J^-------------	J^-------------	J^-------------	J^-------------	J^-------------	0	1	1	1	1	1	1	1	1	1	1	1	1
v	Eu6	RR--6----------	RR--6-----------	RR--6-----------	RR--6-----------	RR--6-----------	RR--6----------	RR--6----------	0	1	1	1	1	1	1	1	1	1	1	1	1													1	1	1	1	1	1
slovenských	AAnp6x	AANP6----1-----	AANP6----1-----	AANP6----1-----	AANP6----1-----	AANP6----1-----	AANP6----1A----	AANP6----1A----	0	1	1	1	1	1	1	1	1	1	1	1	1	1	1	1	1	1	1	1	1	1	1	1	1	1	1	1	1	1	1
kinách	SSnp6	NNNP6----------	NNNP6----------	NNNP6----------	NNNP6----------	NNNP6----------	NNNP6-----A----	NNNP6-----A----	0	1	1	1	1	1	1	1	1	1	1	1	1	1	1	1	1	1	1	1	1	1	1	1	1	1	1	1	1	1	1
by	Y	NNNP6----------	NNNP6----------	NNNP6----------	NNNP6----------	NNNP6----------	Vc-------------	Vc-------------	0	1	1	1	1	0	0	1	1	1	1	0	0	1	1	1	1			1	1	1	1			1	1	1	1
sa	R	NNNP6----------	NNNP6----------	NNNP6----------	NNNP6----------	NNNP6----------	P7-X4----------	P7-X4----------	0	1	1	1	1	0	0	1	1	1	1	0	0	1	1	1	1			1	1	1	1	0	0	1	1	1	1	0	0
mal	VLesci+	V-IS---3R-AA---	V-IS---3R-AA---	V-MS---3R-AA---	V-IS---3R-AA---	V-IS---3R-AA---	VpYS---XR-AA---	VpYS---XR-AA---	0	1	1	1	1	1	1							1	0	1	1	0	0	1	1	1	1	1	1							1	1	1	1	0	0	1	1	1	1
objaviť	VId+	Vf--------AN---	Vf--------AN---	Vf--------AN---	Vf--------AN---	Vf--------AN---	Vf--------A----	Vf--------A----	0	1	1	1	1	1	1	1	1	1	1	1	1
pod	Eu7	RR--7----------	RR--7-----------	RR--7-----------	RR--7-----------	RR--7-----------	RR--7----------	RR--7----------	0	1	1	1	1	1	1	1	1	1	1	1	1													1	1	1	1	1	1
názvom	SSis7	NNIS7----------	NNIS7----------	NNIS7----------	NNIS7----------	NNIS7----------	NNIS7-----A----	NNIS7-----A----	0	1	1	1	1	1	1	1	1	1	1	1	1	1	1	1	1	1	1	1	1	1	1	1	1	1	1	1	1	1	1
Spaľujúca	Gkfs1x:r	NNIS7----------	NNIS7----------	NNIS7----------	NNIS7----------	NNIS7----------	AGFS1-----A----	AGFS1-----A----	0	1	1	1	1	0	0	1	1	1	1	0	0	1	1	1	1	0	0	1	1	1	1	1	1	1	1	1	1	0	0
túžba	SSfs1	NNFS1----------	NNFS1----------	NNFS1----------	NNFS1----------	NNFS1----------	NNFS1-----A----	NNFS1-----A----	0	1	1	1	1	1	1	1	1	1	1	1	1	1	1	1	1	1	1	1	1	1	1	1	1	1	1	1	1	1	1
MICHALKOV	SSms1:r	NNMS1----------	AUMS1----1-----	NNMS1----------	Z:------------	NNMS1----------	NNIP2-----A----	NNIP2-----A----	0	0	1	0	1	1	1	0	1	0	1	1	1	1	1		1	0	0	1	1		1	0	0	1	1		1	0	0
FOR	%	NNMS1----------	AUMS1----1-----	NNMS1----------	Z:------------	NNMS1----------	RR--X----------	RR--X----------	0	0	1	0	1	0	0	0	1	0	1	0	0	1	1		1			1	1		1			1	1		1	0	0
PRESIDENT	%	NNMS1----------	NNMS1----------	NNMS1----------	Z:------------	NNMS1----------	NNFXX-----A----	X@-------------	0	1	1	0	1	1	0	1	1	0	1	1	0	1	1		1	0		1	1		1	0		1	1		1	0
Zoberiem	VKdsa+	VB-S---1P-AN---	V--S---1P-AN---	V--S---1P-AN---	V--S---1P-AN---	V--S---1P-AN---	VB-S---1P-AA---	VB-S---1P-AA---	0	1	1	1	1	1	1					1	1							1	1	1	1	1	1							1	1	1	1	1	1	1	1	1	1
tú	PFfs4	PDFS4----------	PDFS4----------	PDFS4----------	PDFS4----------	PDFS4----------	PDFS4----------	PDFS4----------	0	1	1	1	1	1	1	1	1	1	1	1	1	1	1	1	1	1	1	1	1	1	1	1	1	1	1	1	1	1	1
funkciu	SSfs4	NNFS4----------	NNFS4----------	NNFS4----------	NNFS4----------	NNFS4----------	NNFS4-----A----	NNFS4-----A----	0	1	1	1	1	1	1	1	1	1	1	1	1	1	1	1	1	1	1	1	1	1	1	1	1	1	1	1	1	1	1
ak	O	J^-------------	J^-------------	J^-------------	J^-------------	J^-------------	J,-------------	J,-------------	0	1	1	1	1	1	1	1	1	1	1	0	0
to	PFns4	PDNS4----------	PDNS4----------	PDNS4----------	PDNS4----------	PDNS4----------	PDNS4----------	PDNS4----------	0	1	1	1	1	1	1	1	1	1	1	1	1	1	1	1	1	1	1	1	1	1	1	1	1	1	1	1	1	1	1
ľudia	SSmp1	NNMP1----------	NNMP1----------	NNMP1----------	NNMP1----------	NNMP1----------	NNMP1-----A----	NNMP1-----A----	0	1	1	1	1	1	1	1	1	1	1	1	1	1	1	1	1	1	1	1	1	1	1	1	1	1	1	1	1	1	1
naozaj	T	TT-------------	TT-------------	TT-------------	TT-------------	TT-------------	TT--------------	TT--------------	0	1	1	1	1	1	1	1	1	1	1	1	1
budú	VBepc+	VB-P---3F-AA---	V--P---3F-AA---	V--P---3F-AA---	V--P---3F-AA---	V--P---3F-AA---	VB-P---3F-AA---	VB-P---3F-AA---	0	1	1	1	1	1	1					1	1							1	1	1	1	1	1							1	1	1	1	1	1	1	1	1	1
chcieť	VIe+	Vf--------AA---	Vf--------AA---	Vf--------AA---	Vf--------AA---	Vf--------AA---	Vf--------A----	Vf--------A----	0	1	1	1	1	1	1	1	1	1	1	1	1
povedal	VLdscm+	V-MS---3R-AN---	V-MS---3R-AN---	V-MS---3R-AN---	V-MS---3R-AN---	V-MS---3R-AN---	VpYS---XR-AA---	VpYS---XR-AA---	0	1	1	1	1	1	1							1	1	1	1	0	0	1	1	1	1	1	1							1	1	1	1	0	0	1	1	1	1
režisér	SSms1	NNMS1----------	NNMS1----------	NNMS1----------	NNMS1----------	NNMS1----------	NNMS1-----A----	NNMS1-----A----	0	1	1	1	1	1	1	1	1	1	1	1	1	1	1	1	1	1	1	1	1	1	1	1	1	1	1	1	1	1	1
MADONNA	SSfs1:r	NNFS1----------	NNFS1----------	NNFS1----------	NxFS1----------	NNFS1----------	NNFXX-----A---8	X@-------------	0	1	1	1	1	1	0	1	1	0	1	1	0	1	1	1	1	1		1	1	1	1	0		1	1	1	1	0
REŽISÉRKOU	SSfs7	NNFS7----------	NNFS7----------	NNFS7----------	NNFS7----------	NNFS7----------	NNFS7-----A----	NNFS7-----A----	0	1	1	1	1	1	1	1	1	1	1	1	1	1	1	1	1	1	1	1	1	1	1	1	1	1	1	1	1	1	1
Madonna	SSfs1:r	NNFS1----------	NNFS1----------	NNFS1----------	NNFS1----------	NNFS1----------	NNFS7-----A----	X@-------------	0	1	1	1	1	1	0	1	1	1	1	1	0	1	1	1	1	1		1	1	1	1	1		1	1	1	1	0
po	Eu6	RR--6----------	RR--6-----------	RR--6-----------	RR--6-----------	RR--6-----------	RR--6----------	RR--6----------	0	1	1	1	1	1	1	1	1	1	1	1	1													1	1	1	1	1	1
úspechu	SSis6	NNIS6----------	NNIS6----------	NNIS6----------	NNIS6----------	NNIS6----------	NNIS6-----A----	NNIS6-----A----	0	1	1	1	1	1	1	1	1	1	1	1	1	1	1	1	1	1	1	1	1	1	1	1	1	1	1	1	1	1	1
albumu	SSis2	NNIS2----------	NNIS2----------	NNIS2----------	NNIS2----------	NNIS2----------	NNIS2-----A----	NNIS2-----A----	0	1	1	1	1	1	1	1	1	1	1	1	1	1	1	1	1	1	1	1	1	1	1	1	1	1	1	1	1	1	1
Ray	%	NNIS2----------	NNIS2----------	NNIS2----------	NNIS2----------	NNIS2----------	NNXXX-----A----	X@-------------	0	1	1	1	1	1	0	1	1	1	1	1	0	1	1	1	1	0		1	1	1	1	0		1	1	1	1	0
of	%	NNIS2----------	NNIS2----------	NNIS2----------	NNIS2----------	NNIS2----------	RR--X----------	RR--X----------	0	1	1	1	1	0	0	1	1	1	1	0	0	1	1	1	1			1	1	1	1			1	1	1	1	0	0
Light	%	NNIS2----------	NNIS2----------	NNIS2----------	NNIS2----------	NNIS2----------	NNXXX-----A----	X@-------------	0	1	1	1	1	1	0	1	1	1	1	1	0	1	1	1	1	0		1	1	1	1	0		1	1	1	1	0
odriekla	VLdscf+	V-FS---3R-AN---	V-FS---3R-AN---	V-FS---3R-AN---	V-FS---3R-AN---	V-FS---3R-AN---	VpFS---XR-AA---	VpFS---XR-AA---	0	1	1	1	1	1	1							1	1	1	1	1	1	1	1	1	1	1	1							1	1	1	1	0	0	1	1	1	1
herecké	AAfp4x	AAFP4----1-----	AAFP4----1-----	AAFP4----1-----	AAFP4----1-----	AAFP4----1-----	AAFP4----1A----	AAFP4----1A----	0	1	1	1	1	1	1	1	1	1	1	1	1	1	1	1	1	1	1	1	1	1	1	1	1	1	1	1	1	1	1
ponuky	SSfp4	NNFP4----------	NNFP4----------	NNFP4----------	NNFP4----------	NNFP4----------	NNFP4-----A----	NNFP4-----A----	0	1	1	1	1	1	1	1	1	1	1	1	1	1	1	1	1	1	1	1	1	1	1	1	1	1	1	1	1	1	1
Bude	VBesc+	VB-S---3F-AA---	V--S---3F-AA---	V--S---3F-AA---	V--S---3F-AA---	V--S---3F-AA---	VB-S---3F-AA---	VB-S---3F-AA---	0	1	1	1	1	1	1					1	1							1	1	1	1	1	1							1	1	1	1	1	1	1	1	1	1
to	PFns1	PDNS1----------	PDNS1----------	PDNS1----------	PDNS1----------	PDNS1----------	PDNS1----------	PDNS1----------	0	1	1	1	1	1	1	1	1	1	1	1	1	1	1	1	1	1	1	1	1	1	1	1	1	1	1	1	1	1	1
filmové	AAns1x	AANS1----1-----	AANS1----1-----	AANS1----1-----	AANS1----1-----	AANS1----1-----	AANS1----1A----	AANS1----1A----	0	1	1	1	1	1	1	1	1	1	1	1	1	1	1	1	1	1	1	1	1	1	1	1	1	1	1	1	1	1	1
spracovanie	SSns1	NNNS1----------	NNNS1----------	NNNS1----------	NNNS1----------	NNNS1----------	NNNS1-----A----	NNNS1-----A----	0	1	1	1	1	1	1	1	1	1	1	1	1	1	1	1	1	1	1	1	1	1	1	1	1	1	1	1	1	1	1
románu	SSis2	NNIS2----------	NNIS2----------	NNIS2----------	NNIS2----------	NNIS2----------	NNIS2-----A----	NNIS2-----A----	0	1	1	1	1	1	1	1	1	1	1	1	1	1	1	1	1	1	1	1	1	1	1	1	1	1	1	1	1	1	1
Rene	SUms2:r	NxMS2----------	NxMS2----------	NxMS2----------	NNIS2----------	NxMS2----------	NNMS1-----A----	X@-------------	0	1	1	1	1	1	0	1	1	0	1	0	0	1	1	0	1	1		1	1	1	1	1		1	1	1	1	0
Steinkeho	SSms2:r	NNMS2----------	NxMS2----------	NNMS2----------	NNMS2----------	NNMS2----------	NNMS1-----A----	X@-------------	0	1	1	1	1	1	0	0	1	1	1	1	0	1	1	1	1	1		1	1	1	1	1		1	1	1	1	0
ktorý	PAis1	P4IS1----------	P4IS1----------	P4MS1----------	P4IS1----------	P4IS1----------	P4MS1----------	P4MS1----------	0	1	1	1	1	1	1	1	1	1	1	1	1	1	0	1	1	0	0	1	1	1	1	1	1	1	1	1	1	1	1
vychádza	VKesc+	VB-S---3P-AA---	V--S---3P-AA---	V--S---3P-AA---	V--S---3P-AA---	V--S---3P-AA---	VB-S---3P-AA---	VB-S---3P-AA---	0	1	1	1	1	1	1					1	1							1	1	1	1	1	1							1	1	1	1	1	1	1	1	1	1
v	Eu6	RR--6----------	RR--6-----------	RR--6-----------	RR--6-----------	RR--6-----------	RR--6----------	RR--6----------	0	1	1	1	1	1	1	1	1	1	1	1	1													1	1	1	1	1	1
USA	W	RR--6----------	RR--6-----------	RR--6-----------	RR--6-----------	RR--6-----------	NNIXX-----A----	NNIXX-----A----	0	1	1	1	1	0	0	1	1	1	1	0	0													1	1	1	1	0	0
v	Eu6	RR--6----------	RR--6-----------	RR--6-----------	RR--6-----------	RR--6-----------	RR--6----------	RR--6----------	0	1	1	1	1	1	1	1	1	1	1	1	1													1	1	1	1	1	1
týchto	PFip6	PDIP6----------	PDIP6----------	PDIP6----------	PDIP6----------	PDIP6----------	PDXP6----------	PDXP6----------	0	1	1	1	1	1	1	1	1	1	1	1	1	1	1	1	1	0	0	1	1	1	1	1	1	1	1	1	1	1	1
dňoch	SSip6	NNIP6----------	NNIP6----------	NNIP6----------	NNIP6----------	NNIP6----------	NNIP6-----A----	NNIP6-----A----	0	1	1	1	1	1	1	1	1	1	1	1	1	1	1	1	1	1	1	1	1	1	1	1	1	1	1	1	1	1	1
MALKOVICH	SSms1:r	NNMS1----------	NNMS1----------	NNMS1----------	NNMS1----------	NNMS1----------	NNMS1-----A----	X@-------------	0	1	1	1	1	1	0	1	1	1	1	1	0	1	1	1	1	1		1	1	1	1	1		1	1	1	1	1
AKO	O	J^-------------	J^-------------	J^-------------	J^-------------	J^-------------	J^-------------	J,-------------	0	1	1	1	1	1	1	1	1	1	1	1	0
F	W	J^-------------	J^-------------	J^-------------	J^-------------	J^-------------	NNMXX-----A---8	NNMXX-----A---8	0	1	1	1	1	0	0	1	1	1	1	0	0
W	W	J^-------------	J^-------------	Z:-------------	Z:------------	J^-------------	NNMXX-----A---8	NNMXX-----A---8	0	1	0	0	1	0	0	1	0	0	1	0	0
MURNAU	SSms1:r	NNMS1----------	J^-------------	NNMS1----------	NNMS1----------	NNMS1----------	NNMS2-----A----	X@-------------	0	0	1	1	1	1	0	0	1	1	1	1	0		1	1	1	1			1	1	1	1			1	1	1	0
Nakrúcanie	SSns1	NNNS1----------	NNNS1----------	NNNS1----------	NNNS1----------	NNNS1----------	NNNS1-----A----	NNNS1-----A----	0	1	1	1	1	1	1	1	1	1	1	1	1	1	1	1	1	1	1	1	1	1	1	1	1	1	1	1	1	1	1
by	Y	NNNS1----------	NNNS1----------	NNNS1----------	NNNS1----------	NNNS1----------	Vc-------------	Vc-------------	0	1	1	1	1	0	0	1	1	1	1	0	0	1	1	1	1			1	1	1	1			1	1	1	1
sa	R	NNNS1----------	NNNS1----------	NNNS1----------	NNNS1----------	NNNS1----------	P7-X4----------	P7-X4----------	0	1	1	1	1	0	0	1	1	1	1	0	0	1	1	1	1			1	1	1	1	0	0	1	1	1	1	0	0
malo	VLescn+	V-NX---3R-AA---	V-NX---3R-AA---	V-NX---3R-AA---	V-NX---3R-AA---	V-NX---3R-AA---	VpNS---XR-AA---	VpNS---XR-AA---	0	1	1	1	1	1	1							1	1	1	1	1	1	1	1	1	1	0	0							1	1	1	1	0	0	1	1	1	1
začať	VId+	Vf--------AN---	Vf--------AN---	Vf--------AN---	Vf--------AN---	Vf--------AN---	Vf--------A----	Vf--------A----	0	1	1	1	1	1	1	1	1	1	1	1	1
v	Eu6	RR--6----------	RR--6-----------	RR--6-----------	RR--6-----------	RR--6-----------	RR--6----------	RR--6----------	0	1	1	1	1	1	1	1	1	1	1	1	1													1	1	1	1	1	1
apríli	SSis6	NNIS6----------	NNIS6----------	NNIS6----------	NNIS6----------	NNIS6----------	NNIS6-----A----	NNIS6-----A----	0	1	1	1	1	1	1	1	1	1	1	1	1	1	1	1	1	1	1	1	1	1	1	1	1	1	1	1	1	1	1
v	Eu6	RR--6----------	RR--6-----------	RR--6-----------	RR--6-----------	RR--6-----------	RR--6----------	RR--6----------	0	1	1	1	1	1	1	1	1	1	1	1	1													1	1	1	1	1	1
Luxemburgu	SSis6:r	NNIS6----------	NNIS6----------	NNIS6----------	NNIS6----------	NNIS6----------	NNIS6-----A----	NNIS6-----A----	0	1	1	1	1	1	1	1	1	1	1	1	1	1	1	1	1	1	1	1	1	1	1	1	1	1	1	1	1	1	1
POZOR	J	II-------------	II-------------	II-------------	NNIS4----------	II-------------	XX-------------	XX-------------	0	1	1	0	1	0	0	1	1	0	1	0	0
ŠULAJ	SSms1:r	NNMS1----------	NNMS1----------	NNMS1----------	NNMS1----------	NNMS1----------	NNMS1-----A----	X@-------------	0	1	1	1	1	1	0	1	1	1	1	1	0	1	1	1	1	1		1	1	1	1	1		1	1	1	1	1
PÍŠE	VKesc+	VB-S---3P-AA---	V--S---3P-AA---	V--S---3P-AA---	V--S---3P-AA---	V--S---3P-AA---	VB-S---3P-AA---	VB-S---3P-AA---	0	1	1	1	1	1	1					1	1							1	1	1	1	1	1							1	1	1	1	1	1	1	1	1	1
ROZPRÁVKU	SSfs4	NNFS4----------	NNFS4----------	NNFS4----------	NNFS4----------	NNFS4----------	NNFS4-----A----	NNFS4-----A----	0	1	1	1	1	1	1	1	1	1	1	1	1	1	1	1	1	1	1	1	1	1	1	1	1	1	1	1	1	1	1
Ako	PD	PY-------------	PY-------------	J^-------------	PY-------------	PY-------------	Db-------------	Db-------------	0	1	0	1	1	0	0	1	0	1	1	0	0
vyzerá	VKesc+	VB-S---3P-AA---	V--S---3P-AA---	V--S---3P-AA---	V--S---3P-AA---	V--S---3P-AA---	VB-S---3P-AA---	VB-S---3P-AA---	0	1	1	1	1	1	1					1	1							1	1	1	1	1	1							1	1	1	1	1	1	1	1	1	1
herec	SSms1	NNMS1----------	NNMS1----------	NNMS1----------	NNMS1----------	NNMS1----------	NNMS1-----A----	NNMS1-----A----	0	1	1	1	1	1	1	1	1	1	1	1	1	1	1	1	1	1	1	1	1	1	1	1	1	1	1	1	1	1	1
snov	SSip2	NNIP2----------	NNIP2----------	NNIP2----------	NNIP2----------	NNIP2----------	NNIP2-----A----	NNIP2-----A----	0	1	1	1	1	1	1	1	1	1	1	1	1	1	1	1	1	1	1	1	1	1	1	1	1	1	1	1	1	1	1
Telo	SSns1	NNNS1----------	NNNS1----------	NNNS1----------	NNNS1----------	NNNS1----------	NNNS1-----A----	NNNS1-----A----	0	1	1	1	1	1	1	1	1	1	1	1	1	1	1	1	1	1	1	1	1	1	1	1	1	1	1	1	1	1	1
by	Y	NNNS1----------	NNNS1----------	NNNS1----------	NNNS1----------	NNNS1----------	Vc-------------	Vc-------------	0	1	1	1	1	0	0	1	1	1	1	0	0	1	1	1	1			1	1	1	1			1	1	1	1
malo	VLescn+	V-NX---3R-AA---	V-NX---3R-AA---	V-NX---3R-AA---	V-NX---3R-AA---	V-NX---3R-AA---	VpNS---XR-AA---	VpNS---XR-AA---	0	1	1	1	1	1	1							1	1	1	1	1	1	1	1	1	1	0	0							1	1	1	1	0	0	1	1	1	1
mať	VIe+	Vf--------AA---	Vf--------AA---	Vf--------AA---	Vf--------AA---	Vf--------AA---	Vf--------A----	Vf--------A----	0	1	1	1	1	1	1	1	1	1	1	1	1
šiju	SSfs4	NNFS4----------	NNFS4----------	NNFS4----------	NNFS4----------	NNFS4----------	NNFS4-----A----	NNFS4-----A----	0	1	1	1	1	1	1	1	1	1	1	1	1	1	1	1	1	1	1	1	1	1	1	1	1	1	1	1	1	1	1
Jenny	SUfs2:r	NxFS2----------	NxFS4----------	NxFS2----------	NxFS2----------	NNFS2----------	NNMS2-----A----	X@-------------	0	1	1	1	1	1	0	1	1	1	0	0	0	1	1	1	1	0		1	1	1	1	1		0	1	1	1	1
Elfman	SUfs2:r	NxFS2----------	NxFS1----------	NxFS2----------	NxFS2----------	NxFS2----------	NNMS2-----A----	X@-------------	0	1	1	1	1	1	0	1	1	1	1	0	0	1	1	1	1	0		1	1	1	1	1		0	1	1	1	1
ramená	SSnp4	NNNP4----------	NNNP4----------	NNNP4----------	NNNP4----------	NNFS1----------	NNNP4-----A----	NNNP4-----A----	0	1	1	1	1	1	1	1	1	1	1	1	1	1	1	1	0	1	1	1	1	1	0	1	1	1	1	1	0	1	1
Courtney	SUfs2:r	NxFS2----------	NNNP4----------	NxFS2----------	NxFS2----------	NNFS2----------	NNMS2-----A----	X@-------------	0	1	1	1	1	1	0	0	1	1	0	0	0	0	1	1	1	0		0	1	1	1	1		0	1	1	1	1
Love	SUfs2:r	NxFS2----------	NNNP4----------	NxFS2----------	NxFS2----------	NxFS1----------	NNIS6-----A----	NNIS6-----A----	0	1	1	1	1	1	1	0	1	1	1	0	0	0	1	1	1	0	0	0	1	1	1	1	1	0	1	1	0	0	0
zadok	SSis4	NNIS4----------	NNIS1----------	NNIS4----------	NNIS4----------	NNMS1----------	NNIS1-----A----	NNIS4-----A----	0	1	1	1	1	1	1	1	1	1	1	1	1	1	1	1	0	1	1	1	1	1	1	1	1	0	1	1	0	0	1
Jennifer	SUfs2:r	NxFS2----------	NNIS1----------	NxFS2----------	NxFS2----------	NNMS1----------	NNMS2-----A----	X@-------------	0	1	1	1	1	1	0	0	1	1	0	0	0	0	1	1	0	0		1	1	1	1	1		0	1	1	0	1
Lopez	SUfs2:r	NxFS2----------	NNIS1----------	NxFS2----------	NxFS2----------	NNMS1----------	NNMS2-----A----	X@-------------	0	1	1	1	1	1	0	0	1	1	0	0	0	0	1	1	0	0		1	1	1	1	1		0	1	1	0	1
pupok	SSis4	NNIS4----------	NNIS1----------	NNIS4----------	NNIS4----------	NNIS1----------	NNIS4-----A----	NNIS4-----A----	0	1	1	1	1	1	1	1	1	1	1	1	1	1	1	1	1	1	1	1	1	1	1	1	1	0	1	1	0	1	1
Sandry	SSfs2:r	NNFS2----------	NNFS2----------	NNFS2----------	NNFS2----------	NNFS2----------	NNFS2-----A----	NNFS2-----A----	0	1	1	1	1	1	1	1	1	1	1	1	1	1	1	1	1	1	1	1	1	1	1	1	1	1	1	1	1	1	1
Bullock	SUfs2:r	NxFS2----------	NNFS2----------	NxFS2----------	NxFS2----------	NxFS2----------	NNMS2-----A----	X@-------------	0	1	1	1	1	1	0	0	1	1	1	0	0	1	1	1	1	0		1	1	1	1	1		1	1	1	1	1
a	O	J^-------------	J^-------------	J^-------------	J^-------------	J^-------------	J^-------------	J^-------------	0	1	1	1	1	1	1	1	1	1	1	1	1
nohy	SSfp4	NNFP4----------	NNFP4----------	NNFP4----------	NNFP4----------	NNFP4----------	NNFS2-----A----	NNFP4-----A----	0	1	1	1	1	1	1	1	1	1	1	1	1	1	1	1	1	1	1	1	1	1	1	0	1	1	1	1	1	0	1
Miry	SSfs2:r	NNFS2----------	NNFS2----------	NNFS2----------	NNFS2----------	NNFS2----------	NNMS2-----A----	X@-------------	0	1	1	1	1	1	0	1	1	1	1	1	0	1	1	1	1	0		1	1	1	1	1		1	1	1	1	1
Sorvino	SUfs2:r	NxFS2----------	NNNS1----------	NxFS2----------	NNFS2----------	NxFS2----------	NNMS2-----A----	X@-------------	0	1	1	1	1	1	0	0	1	0	1	0	0	0	1	1	1	0		1	1	1	1	1		0	1	1	1	1
HVIEZDY	SSfp1	NNFP1----------	NNFP4----------	NNFP1----------	NNFS2----------	NNFP1----------	NNFP1-----A----	NNFP1-----A----	0	1	1	1	1	1	1	1	1	1	1	1	1	1	1	1	1	1	1	1	1	0	1	1	1	0	1	0	1	1	1
V	Eu6	RR--6----------	RR--6-----------	RR--6-----------	RR--6-----------	RR--6-----------	RR--6----------	RR--6----------	0	1	1	1	1	1	1	1	1	1	1	1	1													1	1	1	1	1	1
HOLANDSKU	SSns6:r	NNNS6----------	NNNS6----------	NNNS6----------	NNNS6----------	NNNS6----------	NNNS6-----A----	NNNS6-----A----	0	1	1	1	1	1	1	1	1	1	1	1	1	1	1	1	1	1	1	1	1	1	1	1	1	1	1	1	1	1	1
Režíruje	VKesc+	VB-S---3P-AA---	V--S---3P-AA---	V--S---3P-AA---	V--S---3P-AA---	V--S---3P-AA---	VB-S---3P-AA---	VB-S---3P-AA---	0	1	1	1	1	1	1					1	1							1	1	1	1	1	1							1	1	1	1	1	1	1	1	1	1
ho	PFis4	PDIS4----------	PDIS4----------	PDMS4----------	PDMS4----------	PDIS4----------	PHMS4--3-------	PHMS4--3-------	0	1	1	1	1	1	1	1	1	1	1	0	0	1	0	0	1	0	0	1	1	1	1	1	1	1	1	1	1	1	1
holandský	AAms1x	AAMS1----1-----	AAMS1----1-----	AAMS1----1-----	AAMS1----1-----	AAMS1----1-----	AAMS1----1A----	AAMS1----1A----	0	1	1	1	1	1	1	1	1	1	1	1	1	1	1	1	1	1	1	1	1	1	1	1	1	1	1	1	1	1	1
režisér	SSms1	NNMS1----------	NNMS1----------	NNMS1----------	NNMS1----------	NNMS1----------	NNMS1-----A----	NNMS1-----A----	0	1	1	1	1	1	1	1	1	1	1	1	1	1	1	1	1	1	1	1	1	1	1	1	1	1	1	1	1	1	1
Dick	SSms1:r	NNMS1----------	NNMS1----------	NNMS1----------	NNMS1----------	NNMS1----------	NNMS1-----A----	X@-------------	0	1	1	1	1	1	0	1	1	1	1	1	0	1	1	1	1	1		1	1	1	1	1		1	1	1	1	1
Maas	SSms1:r	NNMS1----------	NNMS1----------	NNMS1----------	NNMS1----------	NNMS1----------	NNMS1-----A----	X@-------------	0	1	1	1	1	1	0	1	1	1	1	1	0	1	1	1	1	1		1	1	1	1	1		1	1	1	1	1
Premiéra	SSfs1	NNFS1----------	NNFS1----------	NNFS1----------	NNFS1----------	NNFS1----------	NNFS1-----A----	NNFS1-----A----	0	1	1	1	1	1	1	1	1	1	1	1	1	1	1	1	1	1	1	1	1	1	1	1	1	1	1	1	1	1	1
by	Y	NNFS1----------	NNFS1----------	NNFS1----------	NNFS1----------	NNFS1----------	Vc-------------	Vc-------------	0	1	1	1	1	0	0	1	1	1	1	0	0	1	1	1	1			1	1	1	1			1	1	1	1
mala	VLescf+	V-FS---3R-AA---	V-FS---3R-AA---	V-FS---3R-AA---	V-FS---3R-AA---	V-FS---3R-AA---	VpFS---XR-AA---	VpFS---XR-AA---	0	1	1	1	1	1	1							1	1	1	1	1	1	1	1	1	1	1	1							1	1	1	1	0	0	1	1	1	1
byť	VIe+	Vf--------AA---	Vf--------AA---	Vf--------AA---	Vf--------AA---	Vf--------AA---	Vf--------A----	Vf--------A----	0	1	1	1	1	1	1	1	1	1	1	1	1
už	T	TT-------------	TT-------------	TT-------------	TT-------------	TT-------------	XX-------------	XX-------------	0	1	1	1	1	0	0	1	1	1	1	0	0
koncom	Eu2	RR--2----------	RR--2-----------	RR--2-----------	RR--2-----------	RR--2-----------	NNIS7-----A----	NNIS7-----A----	0	1	1	1	1	0	0	1	1	1	1	0	0													1	1	1	1	0	0
roku	SSis2	NNIS2----------	NNIS2----------	NNIS2----------	NNIS2----------	NNIS2----------	NNIS6-----A----	NNIS6-----A----	0	1	1	1	1	1	1	1	1	1	1	1	1	1	1	1	1	1	1	1	1	1	1	1	1	1	1	1	1	0	0
Detektíva	SSms4	NNMS4----------	NNMS4----------	NNMS4----------	NNMS2----------	NNMS4----------	NNMS2-----A----	NNMS4-----A----	0	1	1	1	1	1	1	1	1	1	1	1	1	1	1	1	1	1	1	1	1	1	1	1	1	1	1	0	1	0	1
Steva	SSms4:r	NNMS4----------	NNMS4----------	NNMS4----------	NNMS2----------	NNMS4----------	NNMS1-----A----	X@-------------	0	1	1	1	1	1	0	1	1	1	1	1	0	1	1	1	1	1		1	1	1	1	1		1	1	0	1	0
McGarretta	SSms4:r	NNMS4----------	NNMS4----------	NNMS4----------	NNMS2----------	NNMS4----------	NNMS1-----A----	X@-------------	0	1	1	1	1	1	0	1	1	1	1	1	0	1	1	1	1	1		1	1	1	1	1		1	1	0	1	0
hral	VLescm+	V-MS---3R-AA---	V-MS---3R-AA---	V-MS---3R-AA---	V-MS---3R-AA---	V-MS---3R-AA---	VpYS---XR-AA---	VpYS---XR-AA---	0	1	1	1	1	1	1							1	1	1	1	0	0	1	1	1	1	1	1							1	1	1	1	0	0	1	1	1	1
Jack	SSms1:r	NNMS1----------	NNMS1----------	NNMS1----------	NNMS1----------	NNMS1----------	NNMS1-----A----	X@-------------	0	1	1	1	1	1	0	1	1	1	1	1	0	1	1	1	1	1		1	1	1	1	1		1	1	1	1	1
Lord	SSms1:r	NNMS1----------	NNMS1----------	NNMS1----------	NNMS1----------	NNMS1----------	NNMS1-----A----	NNMS1-----A----	0	1	1	1	1	1	1	1	1	1	1	1	1	1	1	1	1	1	1	1	1	1	1	1	1	1	1	1	1	1	1
CENY	SSfp1	NNFP1----------	NNFP1----------	NNFP1----------	Z:------------	NNFP1----------	NNFP1-----A----	NNFP1-----A----	0	1	1	0	1	1	1	1	1	0	1	1	1	1	1		1	1	1	1	1		1	1	1	1	1		1	1	1
ČASOPISU	SSis2	NNIS2----------	NNIS2----------	NNIS2----------	NNIS2----------	NNIS2----------	NNIS2-----A----	NNIS2-----A----	0	1	1	1	1	1	1	1	1	1	1	1	1	1	1	1	1	1	1	1	1	1	1	1	1	1	1	1	1	1	1
MOVIELINE	%	NNIS2----------	NNIS2----------	NNIS2----------	NNIS2----------	NNIS2----------	AAXXX----1A----	X@-------------	0	1	1	1	1	0	0	1	1	1	1	0	0	1	1	1	1	0		1	1	1	1	0		1	1	1	1	0
BERLINALE	SUns1:r	NxNS1----------	NNIS2----------	NxNS1----------	NNIS2----------	NNIS2----------	NNMXX-----A----	X@-------------	0	1	1	1	1	1	0	0	1	0	0	0	0	0	1	0	0	0		1	1	1	1	0		0	1	0	0	0
KTO	PFms1	PDMS1----------	PDMS1----------	PDMS1----------	PDMS1----------	PDMS1----------	PKM-1----------	PKM-1----------	0	1	1	1	1	1	1	1	1	1	1	0	0	1	1	1	1	1	1	1	1	1	1			1	1	1	1	1	1
PRÍDE	VKesc+	VB-S---3P-AA---	V--S---3P-AN---	V--S---3P-AN---	V--S---3P-AA---	V--S---3P-AA---	VB-S---3P-AA---	VB-S---3P-AA---	0	1	1	1	1	1	1					1	1							1	1	1	1	1	1							1	1	1	1	1	1	1	1	1	1
Film	SSis1	NNIS1----------	NNIS1----------	NNIS1----------	NNIS1----------	NNIS1----------	NNIS1-----A----	NNIS1-----A----	0	1	1	1	1	1	1	1	1	1	1	1	1	1	1	1	1	1	1	1	1	1	1	1	1	1	1	1	1	1	1
bol	VLesci+	V-IS---3R-AA---	V-IS---3R-AA---	V-IS---3R-AA---	V-IS---3R-AA---	V-IS---3R-AA---	VpYS---XR-AA---	VpYS---XR-AA---	0	1	1	1	1	1	1							1	1	1	1	0	0	1	1	1	1	1	1							1	1	1	1	0	0	1	1	1	1
nakrútený	Gtis1x	V-IS---3R-AA---	V-IS---3R-AA---	V-IS---3R-AA---	V-IS---3R-AA---	V-IS---3R-AA---	VsIS---XX-AP---	VsIS---XX-AP---	0	1	1	1	1	1	1							1	1	1	1	1	1	1	1	1	1	1	1							1	1	1	1	0	0	1	1	1	1
podľa	Eu2	RR--2----------	RR--2-----------	RR--2-----------	RR--2-----------	RR--2-----------	RR--2----------	RR--2----------	0	1	1	1	1	1	1	1	1	1	1	1	1													1	1	1	1	1	1
skutočnej	AAfs2x	AAFS2----1-----	AAFS2----1-----	AAFS2----1-----	AAFS2----1-----	AAFS2----1-----	AAFS2----1A----	AAFS2----1A----	0	1	1	1	1	1	1	1	1	1	1	1	1	1	1	1	1	1	1	1	1	1	1	1	1	1	1	1	1	1	1
udalosti	SSfs2	NNFS2----------	NNFS2----------	NNFS2----------	NNFS2----------	NNFS2----------	NNFS2-----A----	NNFS2-----A----	0	1	1	1	1	1	1	1	1	1	1	1	1	1	1	1	1	1	1	1	1	1	1	1	1	1	1	1	1	1	1
OSCAR	SSms1:r	NNMS1----------	NNMS1----------	NNMS1----------	NNMS1----------	NNMS1----------	NNMS1-----A----	X@-------------	0	1	1	1	1	1	0	1	1	1	1	1	0	1	1	1	1	1		1	1	1	1	1		1	1	1	1	1
ZA	Eu4	RR--4----------	RR--4-----------	RR--4-----------	RR--4-----------	RR--4-----------	RR--4----------	RR--4----------	0	1	1	1	1	1	1	1	1	1	1	1	1													1	1	1	1	1	1
VIZUÁLNE	AAip4x	AAIP4----1-----	AAIP4----1-----	AAIP4----1-----	AAIP4----1-----	AAIP4----1-----	AAIP4----1A----	AAIP4----1A----	0	1	1	1	1	1	1	1	1	1	1	1	1	1	1	1	1	1	1	1	1	1	1	1	1	1	1	1	1	1	1
EFEKTY	SSip4	NNIP4----------	NNIP4----------	NNIP4----------	NNIP4----------	NNIP4----------	NNIP4-----A----	NNIP4-----A----	0	1	1	1	1	1	1	1	1	1	1	1	1	1	1	1	1	1	1	1	1	1	1	1	1	1	1	1	1	1	1
GIBSON	SSms1:r	NNMS1----------	NNIP4----------	NNMS1----------	NNIP4----------	NNMS1----------	AAXXX----1A----	X@-------------	0	1	1	1	1	0	0	1	1	1	1	0	0	0	1	0	1	0		0	1	0	1	0		0	1	0	1	0
OD	Eu2	RR--2----------	RR--2-----------	RR--2-----------	RR--2-----------	RR--2-----------	RR--2----------	RR--2----------	0	1	1	1	1	1	1	1	1	1	1	1	1													1	1	1	1	1	1
WB	W	RR--2----------	RR--2-----------	RR--2-----------	RR--2-----------	RR--2-----------	NNFXX-----A---8	X@-------------	0	1	1	1	1	0	0	1	1	1	1	0	0													1	1	1	1	0
K	Eu3	RR--3----------	RR--3-----------	RR--3-----------	RR--3-----------	RR--3-----------	RR--3----------	NNFXX-----A---8	0	1	1	1	1	1	0	1	1	1	1	1	0													1	1	1	1	1	0
PARAMOUNTU	SSis3:r	NNIS3----------	NNIS3----------	NNIS3----------	NNIS3----------	NNIS3----------	NNMS3-----A----	X@-------------	0	1	1	1	1	1	0	1	1	1	1	1	0	1	1	1	1	0		1	1	1	1	1		1	1	1	1	1
Gibsom	SSms1:rq	NNMS1----------	NNMS1----------	NNMS1----------	NNMS1----------	NNMS1----------	NNMS3-----A----	X@-------------	0	1	1	1	1	1	0	1	1	1	1	1	0	1	1	1	1	1		1	1	1	1	1		1	1	1	1	0
by	Y	NNMS1----------	NNMS1----------	NNMS1----------	NNMS1----------	NNMS1----------	Vc-------------	Vc-------------	0	1	1	1	1	0	0	1	1	1	1	0	0	1	1	1	1			1	1	1	1			1	1	1	1
si	R	NNMS1----------	NNMS1----------	NNMS1----------	NNMS1----------	NNMS1----------	P7-X3----------	P7-X3----------	0	1	1	1	1	0	0	1	1	1	1	0	0	1	1	1	1			1	1	1	1	0	0	1	1	1	1	0	0
mal	VLescm+	V-MS---3R-AA---	V-MS---3R-AA---	V-MS---3R-AA---	V-MS---3R-AA---	V-MS---3R-AA---	VpYS---XR-AA---	VpYS---XR-AA---	0	1	1	1	1	1	1							1	1	1	1	0	0	1	1	1	1	1	1							1	1	1	1	0	0	1	1	1	1
v	Eu6	RR--6----------	RR--6-----------	RR--6-----------	RR--6-----------	RR--6-----------	RR--6----------	RR--6----------	0	1	1	1	1	1	1	1	1	1	1	1	1													1	1	1	1	1	1
jednom	NFis6	CxIS6----------	CxIS6----------	CxIS6----------	CxIS6----------	CxIS6----------	ClIS6----------	ClIS6----------	0	1	1	1	1	1	1	1	1	1	1	0	0	1	1	1	1	1	1	1	1	1	1	1	1	1	1	1	1	1	1
z	Eu2	RR--2----------	RR--2-----------	RR--2-----------	RR--2-----------	RR--2-----------	RR--2----------	RR--2----------	0	1	1	1	1	1	1	1	1	1	1	1	1													1	1	1	1	1	1
nich	PFip2	PDIP2----------	PDIP2----------	PDMP2----------	PDMP2----------	PDIP2----------	P5MP2--3-------	P5MP2--3-------	0	1	1	1	1	1	1	1	1	1	1	0	0	1	0	0	1	0	0	1	1	1	1	1	1	1	1	1	1	1	1
zahrať	VId+	Vf--------AN---	Vf--------AN---	Vf--------AN---	Vf--------AN---	Vf--------AN---	Vf--------A----	Vf--------A----	0	1	1	1	1	1	1	1	1	1	1	1	1
hlavnú	AAfs4x	AAFS4----1-----	AAFS4----1-----	AAFS4----1-----	AAFS4----1-----	AAFS4----1-----	AAFS4----1A----	AAFS4----1A----	0	1	1	1	1	1	1	1	1	1	1	1	1	1	1	1	1	1	1	1	1	1	1	1	1	1	1	1	1	1	1
úlohu	SSfs4	NNFS4----------	NNFS4----------	NNFS4----------	NNFS4----------	NNFS4----------	NNFS4-----A----	NNFS4-----A----	0	1	1	1	1	1	1	1	1	1	1	1	1	1	1	1	1	1	1	1	1	1	1	1	1	1	1	1	1	1	1
TRAVOLTA	SSms1:r	NNMS1----------	NNMS1----------	NNMS1----------	NNMS1----------	NNMS1----------	NNFXX-----A---8	X@-------------	0	1	1	1	1	1	0	1	1	1	1	1	0	1	1	1	1	0		1	1	1	1	0		1	1	1	1	0
OPäŤ	Dx	Db-------1-----	Db-------1-----	Db-------1-----	Db-------1-----	Db-------1-----	Db-------------	Db-------------	0	1	1	1	1	1	1	1	1	1	1	1	1
SPIEVA	VKesc+	VB-S---3P-AA---	V--S---3P-AA---	V--S---3P-AA---	V--S---3P-AA---	V--S---3P-AA---	VB-S---3P-AA---	VB-S---3P-AA---	0	1	1	1	1	1	1					1	1							1	1	1	1	1	1							1	1	1	1	1	1	1	1	1	1
Úspešný	AAis1x	AAIS1----1-----	AAIS1----1-----	AAIS1----1-----	AAIS4----1-----	AAIS1----1-----	AAIS1----1A----	AAIS1----1A----	0	1	1	1	1	1	1	1	1	1	1	1	1	1	1	1	1	1	1	1	1	1	1	1	1	1	1	0	1	1	1
film	SSis1	NNIS1----------	NNIS1----------	NNIS1----------	NNIS1----------	NNIS1----------	NNIS1-----A----	NNIS1-----A----	0	1	1	1	1	1	1	1	1	1	1	1	1	1	1	1	1	1	1	1	1	1	1	1	1	1	1	1	1	1	1
Tentoraz	Dx	Db-------1-----	Db-------1-----	Db-------1-----	Db-------1-----	Db-------1-----	Db-------------	Db-------------	0	1	1	1	1	1	1	1	1	1	1	1	1
na	Eu4	RR--4----------	RR--4-----------	RR--4-----------	RR--4-----------	RR--4-----------	RR--4----------	RR--4----------	0	1	1	1	1	1	1	1	1	1	1	1	1													1	1	1	1	1	1
televízne	AAfp4x	AAFP4----1-----	AAFP4----1-----	AAFP4----1-----	AAFP4----1-----	AAFP4----1-----	AAFP4----1A----	AAFP4----1A----	0	1	1	1	1	1	1	1	1	1	1	1	1	1	1	1	1	1	1	1	1	1	1	1	1	1	1	1	1	1	1
obrazovky	SSfp4	NNFP4----------	NNFP4----------	NNFP4----------	NNFP4----------	NNFP4----------	NNFP4-----A----	NNFP4-----A----	0	1	1	1	1	1	1	1	1	1	1	1	1	1	1	1	1	1	1	1	1	1	1	1	1	1	1	1	1	1	1
v	Eu6	RR--6----------	RR--6-----------	RR--6-----------	RR--6-----------	RR--6-----------	RR--6----------	RR--6----------	0	1	1	1	1	1	1	1	1	1	1	1	1													1	1	1	1	1	1
podobe	SSfs6	NNFS6----------	NNFS6----------	NNFS6----------	NNFS6----------	NNFS6----------	NNFS6-----A----	NNFS6-----A----	0	1	1	1	1	1	1	1	1	1	1	1	1	1	1	1	1	1	1	1	1	1	1	1	1	1	1	1	1	1	1
dielneho	Q	C=-------------	AAIS2----1-----	C=-------------	Z:------------	C--------------	AAIS2----1A----	AAIS2----1A----	0	0	1	0	1	0	0	0	1	0		0	0
seriálu	SSis2	NNIS2----------	NNIS2----------	NNIS2----------	NNIS2----------	NNIS2----------	NNIS2-----A----	NNIS2-----A----	0	1	1	1	1	1	1	1	1	1	1	1	1	1	1	1	1	1	1	1	1	1	1	1	1	1	1	1	1	1	1
JACKIE	SFms1:r	NxMS1----------	NxMS1----------	NxMS1----------	NNMS1----------	NxMS1----------	NNMS1-----A----	X@-------------	0	1	1	1	1	1	0	1	1	0	1	0	0	1	1	1	1	1		1	1	1	1	1		1	1	1	1	1
CHAN	SSms1:r	NNMS1----------	NNMS1----------	NNMS1----------	NNMS1----------	NNMS1----------	NNMS1-----A----	X@-------------	0	1	1	1	1	1	0	1	1	1	1	1	0	1	1	1	1	1		1	1	1	1	1		1	1	1	1	1
AN	Eu6:q	RR--x----------	NNMS1----------	RR--6-----------	RR--x-----------	RR--6-----------	RR--X----------	AAXXX----1A---1	0	0	1	1	1	1	0	0	1	1	1	1	0													0	0	1	0	1	1
DIVOKOM	AAis6x	AAIS6----1-----	AAIS6----1-----	AAIS6----1-----	AAIS6----1-----	AAIS6----1-----	AAIS6----1A----	AAIS6----1A----	0	1	1	1	1	1	1	1	1	1	1	1	1	1	1	1	1	1	1	1	1	1	1	1	1	1	1	1	1	1	1
ZÁPADE	SSis6	NNIS6----------	NNIS6----------	NNIS6----------	NNIS6----------	NNIS6----------	NNIS6-----A----	NNIS6-----A----	0	1	1	1	1	1	1	1	1	1	1	1	1	1	1	1	1	1	1	1	1	1	1	1	1	1	1	1	1	1	1
Bude	VBesc+	VB-S---3F-AA---	V--S---3F-AA---	V--S---3F-AA---	V--S---3F-AA---	V--S---3F-AA---	VB-S---3F-AA---	VB-S---3F-AA---	0	1	1	1	1	1	1					1	1							1	1	1	1	1	1							1	1	1	1	1	1	1	1	1	1
mať	VIe+	Vf--------AA---	Vf--------AA---	Vf--------AA---	Vf--------AA---	Vf--------AA---	Vf--------A----	Vf--------A----	0	1	1	1	1	1	1	1	1	1	1	1	1
názov	SSis4	NNIS4----------	NNIS4----------	NNIS1----------	NNIS4----------	NNIS4----------	NNIS4-----A----	NNIS4-----A----	0	1	1	1	1	1	1	1	1	1	1	1	1	1	1	1	1	1	1	1	1	1	1	1	1	1	0	1	1	1	1
Shanghai	%	NNIS4----------	NNIS4----------	NNIS1----------	NNIS4----------	NNIS4----------	NNMS2-----A----	X@-------------	0	1	1	1	1	1	0	1	1	1	1	1	0	1	1	1	1	0		1	1	1	1	1		1	0	1	1	0
Noon	%	NNIS4----------	NNIS4----------	NNIS1----------	NNIS4----------	NNIS4----------	NNMS2-----A----	X@-------------	0	1	1	1	1	1	0	1	1	1	1	1	0	1	1	1	1	0		1	1	1	1	1		1	0	1	1	0
a	O	J^-------------	J^-------------	J^-------------	J^-------------	J^-------------	J^-------------	J^-------------	0	1	1	1	1	1	1	1	1	1	1	1	1
režisérom	SSms7	NNMS7----------	NNMS7----------	NNMS7----------	NNMS7----------	NNMS7----------	NNMS7-----A----	NNMS7-----A----	0	1	1	1	1	1	1	1	1	1	1	1	1	1	1	1	1	1	1	1	1	1	1	1	1	1	1	1	1	1	1
bude	VBesc+	VB-S---3F-AA---	V--S---3F-AA---	V--S---3F-AA---	V--S---3F-AA---	V--S---3F-AA---	VB-S---3F-AA---	VB-S---3F-AA---	0	1	1	1	1	1	1					1	1							1	1	1	1	1	1							1	1	1	1	1	1	1	1	1	1
debutujúci	Gkms1x	VB-S---3F-AA---	V--S---3F-AA---	V--S---3F-AA---	V--S---3F-AA---	V--S---3F-AA---	AGMS1-----A----	AGIS1-----A----	0	1	1	1	1	0	0					0	0							1	1	1	1	1	1							1	1	1	1			1	1	1	1
Tom	SSms1:r	NNMS1----------	NNMS1----------	NNMS1----------	NNMS1----------	NNMS1----------	PDIS6----------	PDIS6----------	0	1	1	1	1	0	0	1	1	1	1	0	0	1	1	1	1	0	0	1	1	1	1	1	1	1	1	1	1	0	0
Dey	SSms1:r	NNMS1----------	NNMS1----------	NNMS1----------	NNMS1----------	NNMS1----------	NNMS1-----A----	X@-------------	0	1	1	1	1	1	0	1	1	1	1	1	0	1	1	1	1	1		1	1	1	1	1		1	1	1	1	1
Chan	SSms1:r	NNMS1----------	NNMS1----------	NNMS1----------	NNMS1----------	NNMS1----------	NNMS1-----A----	X@-------------	0	1	1	1	1	1	0	1	1	1	1	1	0	1	1	1	1	1		1	1	1	1	1		1	1	1	1	1
si	R	NNMS1----------	NNMS1----------	NNMS1----------	NNMS1----------	NNMS1----------	P7-X3----------	P7-X3----------	0	1	1	1	1	0	0	1	1	1	1	0	0	1	1	1	1			1	1	1	1	0	0	1	1	1	1	0	0
zahrá	VKdsc+	VB-S---3P-AN---	V--S---3P-AN---	V--S---3P-AN---	V--S---3P-AN---	V--S---3P-AN---	VB-S---3P-AA---	VB-S---3P-AA---	0	1	1	1	1	1	1					1	1							1	1	1	1	1	1							1	1	1	1	1	1	1	1	1	1
Číňana	SSms4:r	NNMS4----------	NNMS4----------	NNMS4----------	NNMS4----------	NNMS4----------	NNMS4-----A----	NNMS4-----A----	0	1	1	1	1	1	1	1	1	1	1	1	1	1	1	1	1	1	1	1	1	1	1	1	1	1	1	1	1	1	1
ktorý	PAms1	P4MS1----------	P4MS1----------	P4MS1----------	P4MS1----------	P4MS1----------	P4MS1----------	P4MS1----------	0	1	1	1	1	1	1	1	1	1	1	1	1	1	1	1	1	1	1	1	1	1	1	1	1	1	1	1	1	1	1
pricestuje	VKdsc+	VB-S---3P-AN---	V--S---3P-AN---	V--S---3P-AN---	V--S---3P-AN---	V--S---3P-AN---	VB-S---3P-AA---	VB-S---3P-AA---	0	1	1	1	1	1	1					1	1							1	1	1	1	1	1							1	1	1	1	1	1	1	1	1	1
na	Eu4	RR--4----------	RR--4-----------	RR--4-----------	RR--4-----------	RR--4-----------	RR--4----------	RR--4----------	0	1	1	1	1	1	1	1	1	1	1	1	1													1	1	1	1	1	1
Divoký	AAis4x:r	AAIS4----1-----	AAIS4----1-----	AAIS4----1-----	AUIS4----1-----	AAIS4----1-----	AAIS4----1A----	AAIS4----1A----	0	1	1	1	1	1	1	1	1	0	1	1	1	1	1	1	1	1	1	1	1	1	1	1	1	1	1	1	1	1	1
západ	SSis4	NNIS4----------	NNIS4----------	NNIS4----------	NNIS4----------	NNIS4----------	NNIS4-----A----	NNIS4-----A----	0	1	1	1	1	1	1	1	1	1	1	1	1	1	1	1	1	1	1	1	1	1	1	1	1	1	1	1	1	1	1
aby	OY	J,-------------	J,-------------	J,-------------	J,-------------	J,-------------	J,-------------	J,-------------	0	1	1	1	1	1	1	1	1	1	1	1	1
zachránil	VLdscm+	V-MS---3R-AN---	V-MS---3R-AN---	V-MS---3R-AN---	V-MS---3R-AN---	V-MS---3R-AN---	VpYS---XR-AA---	VpYS---XR-AA---	0	1	1	1	1	1	1							1	1	1	1	0	0	1	1	1	1	1	1							1	1	1	1	0	0	1	1	1	1
unesenú	Gtfs4x	V-MS---3R-AN---	V-MS---3R-AN---	V-MS---3R-AN---	V-MS---3R-AN---	V-MS---3R-AN---	AAFS4----1A----	AAFS4----1A----	0	1	1	1	1	0	0							1	1	1	1	0	0	1	1	1	1	1	1							1	1	1	1			1	1	1	1
dcéru	SSfs4	NNFS4----------	NNFS4----------	NNFS4----------	NNFS4----------	NNFS4----------	NNFS4-----A----	NNFS4-----A----	0	1	1	1	1	1	1	1	1	1	1	1	1	1	1	1	1	1	1	1	1	1	1	1	1	1	1	1	1	1	1
čínskeho	AAms2x	AAMS2----1-----	AAMS2----1-----	AAMS2----1-----	AAMS2----1-----	AAMS2----1-----	AAMS2----1A----	AAMS2----1A----	0	1	1	1	1	1	1	1	1	1	1	1	1	1	1	1	1	1	1	1	1	1	1	1	1	1	1	1	1	1	1
konzula	SSms2	NNMS2----------	NNMS2----------	NNMS2----------	NNMS2----------	NNMS2----------	NNMS2-----A----	NNMS2-----A----	0	1	1	1	1	1	1	1	1	1	1	1	1	1	1	1	1	1	1	1	1	1	1	1	1	1	1	1	1	1	1
JODIE	SUfs1:r	NxFS1----------	NxMS1----------	NxFS1----------	NxFS1----------	NxFS1----------	NNMS1-----A----	X@-------------	0	1	1	1	1	1	0	1	1	1	1	0	0	0	1	1	1	0		1	1	1	1	1		1	1	1	1	1
FOSTER	SUfs1:r	NxFS1----------	NNMS1----------	NxFS1----------	NxFS1----------	NxFS1----------	NNMS1-----A----	X@-------------	0	1	1	1	1	1	0	0	1	1	1	0	0	0	1	1	1	0		1	1	1	1	1		1	1	1	1	1
V	Eu6	RR--6----------	RR--6-----------	RR--6-----------	RR--6-----------	RR--6-----------	RR--6----------	RR--6----------	0	1	1	1	1	1	1	1	1	1	1	1	1													1	1	1	1	1	1
CIRKUSE	SSis6	NNIS6----------	NNIS6----------	NNIS6----------	NNIS6----------	NNIS6----------	NNIS6-----A----	NNIS6-----A----	0	1	1	1	1	1	1	1	1	1	1	1	1	1	1	1	1	1	1	1	1	1	1	1	1	1	1	1	1	1	1
Jodie	SUfs1:r	NxFS1----------	NxMS1----------	NxFS1----------	NxFS1----------	NxFS1----------	NNMS3-----A----	X@-------------	0	1	1	1	1	1	0	1	1	1	1	0	0	0	1	1	1	0		1	1	1	1	1		1	1	1	1	0
Foster	SUfs1:r	NxFS1----------	NNMS1----------	NxFS1----------	NxFS1----------	NxFS1----------	NNMS3-----A----	X@-------------	0	1	1	1	1	1	0	0	1	1	1	0	0	0	1	1	1	0		1	1	1	1	1		1	1	1	1	0
sa	R	NxFS1----------	NNMS1----------	NxFS1----------	NxFS1----------	NxFS1----------	P7-X4----------	P7-X4----------	0	1	1	1	1	0	0	0	1	1	1	0	0	0	1	1	1			1	1	1	1	0	0	1	1	1	1	0	0
vracia	VKesc+	VB-S---3P-AA---	V--S---3P-AA---	V--S---3P-AA---	V--S---3P-AA---	V--S---3P-AA---	VB-S---3P-AA---	VB-S---3P-AA---	0	1	1	1	1	1	1					1	1							1	1	1	1	1	1							1	1	1	1	1	1	1	1	1	1
k	Eu3	RR--3----------	RR--3-----------	RR--3-----------	RR--3-----------	RR--3-----------	RR--3----------	RR--3----------	0	1	1	1	1	1	1	1	1	1	1	1	1													1	1	1	1	1	1
filmu	SSis3	NNIS3----------	NNIS3----------	NNIS3----------	NNIS3----------	NNIS3----------	NNIS3-----A----	NNIS3-----A----	0	1	1	1	1	1	1	1	1	1	1	1	1	1	1	1	1	1	1	1	1	1	1	1	1	1	1	1	1	1	1
Tentoraz	Dx	Db-------1-----	Db-------1-----	Db-------1-----	Db-------1-----	Db-------1-----	Db-------------	Db-------------	0	1	1	1	1	1	1	1	1	1	1	1	1
ako	O	J^-------------	J^-------------	J^-------------	J^-------------	J^-------------	J,-------------	J,-------------	0	1	1	1	1	1	1	1	1	1	1	0	0
režisérka	SSfs1	NNFS1----------	NNFS1----------	NNFS1----------	NNFS1----------	NNFS1----------	NNFS1-----A----	NNFS1-----A----	0	1	1	1	1	1	1	1	1	1	1	1	1	1	1	1	1	1	1	1	1	1	1	1	1	1	1	1	1	1	1
a	O	J^-------------	J^-------------	J^-------------	J^-------------	J^-------------	J^-------------	J^-------------	0	1	1	1	1	1	1	1	1	1	1	1	1
producentka	SSfs1	NNFS1----------	NNFS1----------	NNFS1----------	NNFS1----------	NNFS1----------	NNFS1-----A----	NNFS1-----A----	0	1	1	1	1	1	1	1	1	1	1	1	1	1	1	1	1	1	1	1	1	1	1	1	1	1	1	1	1	1	1
Flora	%	NNFS1----------	NNFS1----------	Z:-------------	NNFS1----------	NNFS1----------	NNFS1-----A----	X@-------------	0	1	0	1	1	1	0	1	0	1	1	1	0	1		1	1	1		1		1	1	1		1		1	1	1
Plum	%	NNFS1----------	NNFS1----------	Z:-------------	NNFS1----------	NNFS1----------	NNIS1-----A----	X@-------------	0	1	0	1	1	1	0	1	0	1	1	1	0	1		1	1	0		1		1	1	1		1		1	1	1
je	VKesc+	VB-S---3P-AA---	V--S---3P-AA---	V--S---3P-AA---	V--S---3P-AA---	V--S---3P-AA---	VB-S---3P-AA---	VB-S---3P-AA---	0	1	1	1	1	1	1					1	1							1	1	1	1	1	1							1	1	1	1	1	1	1	1	1	1
ľúbostný	AAis1x	AAIS1----1-----	AAIS1----1-----	AAIS1----1-----	AAIS1----1-----	AAIS1----1-----	AAIS1----1A----	AAIS1----1A----	0	1	1	1	1	1	1	1	1	1	1	1	1	1	1	1	1	1	1	1	1	1	1	1	1	1	1	1	1	1	1
príbeh	SSis1	NNIS1----------	NNIS1----------	NNIS1----------	NNIS1----------	NNIS1----------	NNIS1-----A----	NNIS1-----A----	0	1	1	1	1	1	1	1	1	1	1	1	1	1	1	1	1	1	1	1	1	1	1	1	1	1	1	1	1	1	1
odohrávajúci	Gkis1x	NNIS1----------	NNIS1----------	NNIS1----------	Z:------------	NNIS1----------	AGIS1-----A----	AGIS1-----A----	0	1	1	0	1	0	0	1	1	0	1	0	0	1	1		1	1	1	1	1		1	1	1	1	1		1	1	1
sa	R	NNIS1----------	NNIS1----------	NNIS1----------	Z:------------	NNIS1----------	P7-X4----------	P7-X4----------	0	1	1	0	1	0	0	1	1	0	1	0	0	1	1		1			1	1		1	0	0	1	1		1	0	0
počas	Eu2	RR--2----------	RR--2-----------	RR--2-----------	RR--2-----------	RR--2-----------	RR--2----------	RR--2----------	0	1	1	1	1	1	1	1	1	1	1	1	1													1	1	1	1	1	1
tridsiatych	NAip2	CxIP2----------	CxIP2----------	CxIP2----------	CxIP2----------	CxIP2----------	CrXP2----------	CrXP2----------	0	1	1	1	1	1	1	1	1	1	1	0	0	1	1	1	1	0	0	1	1	1	1	1	1	1	1	1	1	1	1
rokov	SSip2	NNIP2----------	NNIP2----------	NNIP2----------	NNIP2----------	NNIP2----------	NNIP2-----A----	NNIP2-----A----	0	1	1	1	1	1	1	1	1	1	1	1	1	1	1	1	1	1	1	1	1	1	1	1	1	1	1	1	1	1	1
v	Eu6	RR--6----------	RR--6-----------	RR--6-----------	RR--6-----------	RR--6-----------	RR--6----------	RR--6----------	0	1	1	1	1	1	1	1	1	1	1	1	1													1	1	1	1	1	1
prostredí	SSns6	NNNS6----------	NNNS6----------	NNNS6----------	NNNS6----------	NNNS6----------	NNNS6-----A----	NNNS6-----A----	0	1	1	1	1	1	1	1	1	1	1	1	1	1	1	1	1	1	1	1	1	1	1	1	1	1	1	1	1	1	1
cirkusu	SSis2	NNIS2----------	NNIS2----------	NNIS2----------	NNIS2----------	NNIS2----------	NNIS2-----A----	NNIS2-----A----	0	1	1	1	1	1	1	1	1	1	1	1	1	1	1	1	1	1	1	1	1	1	1	1	1	1	1	1	1	1	1
Vlani	Dx	Db-------1-----	Db-------1-----	Db-------1-----	Db-------1-----	Db-------1-----	XX-------------	XX-------------	0	1	1	1	1	0	0	1	1	1	1	0	0
získal	VLdscm+	V-MS---3R-AN---	V-MS---3R-AN---	V-MS---3R-AN---	V-MS---3R-AN---	V-MS---3R-AN---	VpYS---XR-AA---	VpYS---XR-AA---	0	1	1	1	1	1	1							1	1	1	1	0	0	1	1	1	1	1	1							1	1	1	1	0	0	1	1	1	1
toto	PFns4	PDNS4----------	PDNS4----------	PDNS4----------	PDNS4----------	PDNS4----------	PDNS4----------	PDNS4----------	0	1	1	1	1	1	1	1	1	1	1	1	1	1	1	1	1	1	1	1	1	1	1	1	1	1	1	1	1	1	1
ocenenie	SSns4	NNNS4----------	NNNS4----------	NNNS4----------	NNNS4----------	NNNS4----------	NNNS4-----A----	NNNS4-----A----	0	1	1	1	1	1	1	1	1	1	1	1	1	1	1	1	1	1	1	1	1	1	1	1	1	1	1	1	1	1	1
režisér	SSms1	NNMS1----------	NNMS1----------	NNMS1----------	NNMS1----------	NNMS1----------	NNMS1-----A----	NNMS1-----A----	0	1	1	1	1	1	1	1	1	1	1	1	1	1	1	1	1	1	1	1	1	1	1	1	1	1	1	1	1	1	1
Stanley	SFms1:r	NxMS1----------	NxMS1----------	NxMS1----------	NNMS1----------	NxMS1----------	NNMS1-----A----	X@-------------	0	1	1	1	1	1	0	1	1	0	1	0	0	1	1	1	1	1		1	1	1	1	1		1	1	1	1	1
Donen	SSms1:r	NNMS1----------	NNMS1----------	NNMS1----------	NNMS1----------	NNMS1----------	NNMS1-----A----	X@-------------	0	1	1	1	1	1	0	1	1	1	1	1	0	1	1	1	1	1		1	1	1	1	1		1	1	1	1	1
ALAN	SSms1:r	NNMS1----------	NNMS1----------	NNMS1----------	NNMS1----------	NNMS1----------	NNIXX-----A---8	X@-------------	0	1	1	1	1	1	0	1	1	1	1	1	0	1	1	1	1	0		1	1	1	1	0		1	1	1	1	0
SMITHEE	SFms1:r	NxMS1----------	NxMS1----------	NxMS1----------	NNMS1----------	NxMS1----------	NNNXX-----A---8	X@-------------	0	1	1	1	1	1	0	1	1	0	1	0	0	1	1	1	1	0		1	1	1	1	0		1	1	1	1	0
V	Eu6	RR--6----------	RR--6-----------	RR--6-----------	RR--6-----------	RR--6-----------	RR--6----------	RR--6----------	0	1	1	1	1	1	1	1	1	1	1	1	1													1	1	1	1	1	1
TELEVÍZII	SSfs6	NNFS6----------	NNFS6----------	NNFS6----------	NNFS6----------	NNFS6----------	NNFS6-----A----	NNFS6-----A----	0	1	1	1	1	1	1	1	1	1	1	1	1	1	1	1	1	1	1	1	1	1	1	1	1	1	1	1	1	1	1
Alan	SSms1:r	NNMS1----------	NNMS1----------	NNMS1----------	NNMS1----------	NNMS1----------	NNMS2-----A----	X@-------------	0	1	1	1	1	1	0	1	1	1	1	1	0	1	1	1	1	1		1	1	1	1	1		1	1	1	1	0
Smithee	SFms1:r	NxMS1----------	NxMS1----------	NxMS1----------	NNMS1----------	NxMS1----------	NNMS2-----A----	X@-------------	0	1	1	1	1	1	0	1	1	0	1	0	0	1	1	1	1	1		1	1	1	1	1		1	1	1	1	0
je	VKesc+	VB-S---3P-AA---	V--S---3P-AA---	V--S---3P-AA---	V--S---3P-AA---	V--S---3P-AA---	VB-S---3P-AA---	VB-S---3P-AA---	0	1	1	1	1	1	1					1	1							1	1	1	1	1	1							1	1	1	1	1	1	1	1	1	1
meno	SSns1	NNNS1----------	NNNS1----------	NNNS1----------	NNNS1----------	NNNS1----------	NNNS1-----A----	NNNS1-----A----	0	1	1	1	1	1	1	1	1	1	1	1	1	1	1	1	1	1	1	1	1	1	1	1	1	1	1	1	1	1	1
ktoré	PAns1	P4NS1----------	P4NS1----------	P4NS1----------	P4NS1----------	P4NS1----------	P4NS1----------	P4NS1----------	0	1	1	1	1	1	1	1	1	1	1	1	1	1	1	1	1	1	1	1	1	1	1	1	1	1	1	1	1	1	1
sa	R	P4NS1----------	P4NS1----------	P4NS1----------	P4NS1----------	P4NS1----------	P7-X4----------	P7-X4----------	0	1	1	1	1	1	1	1	1	1	1	0	0	1	1	1	1			1	1	1	1	0	0	1	1	1	1	0	0
používa	VKesc+	VB-S---3P-AA---	V--S---3P-AA---	V--S---3P-AA---	V--S---3P-AA---	V--S---3P-AA---	VB-S---3P-AA---	VB-S---3P-AA---	0	1	1	1	1	1	1					1	1							1	1	1	1	1	1							1	1	1	1	1	1	1	1	1	1
v	Eu6	RR--6----------	RR--6-----------	RR--6-----------	RR--6-----------	RR--6-----------	RR--6----------	RR--6----------	0	1	1	1	1	1	1	1	1	1	1	1	1													1	1	1	1	1	1
titulkoch	SSip6	NNIP6----------	NNIP6----------	NNIP6----------	NNIP6----------	NNIP6----------	NNIP6-----A----	NNIP6-----A----	0	1	1	1	1	1	1	1	1	1	1	1	1	1	1	1	1	1	1	1	1	1	1	1	1	1	1	1	1	1	1
keď	O	J^-------------	J^-------------	J^-------------	J^-------------	J^-------------	J,-------------	J,-------------	0	1	1	1	1	1	1	1	1	1	1	0	0
ražisér	SSms1:q	NNMS1----------	NNMS1----------	NNMS1----------	NNMS1----------	NNMS1----------	NNIS3-----A----	X@-------------	0	1	1	1	1	1	0	1	1	1	1	1	0	1	1	1	1	0		1	1	1	1	1		1	1	1	1	0
z	Eu2	RR--2----------	RR--2-----------	RR--2-----------	RR--2-----------	RR--2-----------	RR--2----------	RR--2----------	0	1	1	1	1	1	1	1	1	1	1	1	1													1	1	1	1	1	1
rôznych	AAfp2x	AAFP2----1-----	AAFP2----1-----	AAFP2----1-----	AAFP2----1-----	AAFP2----1-----	AAFP2----1A----	AAFP2----1A----	0	1	1	1	1	1	1	1	1	1	1	1	1	1	1	1	1	1	1	1	1	1	1	1	1	1	1	1	1	1	1
príčin	SSfp2	NNFP2----------	NNFP2----------	NNFP2----------	NNFP2----------	NNFP2----------	NNFP2-----A----	NNFP2-----A----	0	1	1	1	1	1	1	1	1	1	1	1	1	1	1	1	1	1	1	1	1	1	1	1	1	1	1	1	1	1	1
nesúhlasí	VKesc-	VB-S---3P-NA---	V--S---3P-NA---	V--S---3P-NA---	V--S---3P-NA---	V--S---3P-NA---	VB-S---3P-NA---	VB-S---3P-NA---	0	1	1	1	1	1	1					1	1							1	1	1	1	1	1							1	1	1	1	1	1	1	1	1	1
s	Eu7	RR--7----------	RR--7-----------	RR--7-----------	RR--7-----------	RR--7-----------	RR--7----------	RR--7----------	0	1	1	1	1	1	1	1	1	1	1	1	1													1	1	1	1	1	1
uvedením	SSns7	NNNS7----------	NNNS7----------	NNNS7----------	NNNS7----------	NNNS7----------	NNNS7-----A----	NNNS7-----A----	0	1	1	1	1	1	1	1	1	1	1	1	1	1	1	1	1	1	1	1	1	1	1	1	1	1	1	1	1	1	1
vlastného	AAns2x	AANS2----1-----	AANS2----1-----	AANS2----1-----	AANS2----1-----	AANS2----1-----	AANS2----1A----	AANS2----1A----	0	1	1	1	1	1	1	1	1	1	1	1	1	1	1	1	1	1	1	1	1	1	1	1	1	1	1	1	1	1	1
mena	SSns2	NNNS2----------	NNNS2----------	NNNS2----------	NNNS2----------	NNNS2----------	NNNS2-----A----	NNNS2-----A----	0	1	1	1	1	1	1	1	1	1	1	1	1	1	1	1	1	1	1	1	1	1	1	1	1	1	1	1	1	1	1
Použitie	SSns1	NNNS1----------	NNNS1----------	NNNS1----------	NNNS1----------	NNNS1----------	NNNS1-----A----	NNNS1-----A----	0	1	1	1	1	1	1	1	1	1	1	1	1	1	1	1	1	1	1	1	1	1	1	1	1	1	1	1	1	1	1
tohto	PFns2	PDNS2----------	PDNS2----------	PDNS2----------	PDNS2----------	PDNS2----------	PDIS2----------	PDIS2----------	0	1	1	1	1	1	1	1	1	1	1	1	1	1	1	1	1	0	0	1	1	1	1	1	1	1	1	1	1	1	1
mena	SSns2	NNNS2----------	NNNS2----------	NNNS2----------	NNNS2----------	NNNS2----------	NNNS2-----A----	NNNS2-----A----	0	1	1	1	1	1	1	1	1	1	1	1	1	1	1	1	1	1	1	1	1	1	1	1	1	1	1	1	1	1	1
pri	Eu6	RR--6----------	RR--6-----------	RR--6-----------	RR--6-----------	RR--6-----------	RR--6----------	RR--6----------	0	1	1	1	1	1	1	1	1	1	1	1	1													1	1	1	1	1	1
televíznom	AAns6x	AANS6----1-----	AANS6----1-----	AANS6----1-----	AANS6----1-----	AANS6----1-----	AANS6----1A----	AANS6----1A----	0	1	1	1	1	1	1	1	1	1	1	1	1	1	1	1	1	1	1	1	1	1	1	1	1	1	1	1	1	1	1
uvedení	SSns6	NNNS6----------	NNNS6----------	NNNS6----------	NNNS6----------	NNNS6----------	NNNS6-----A----	NNNS6-----A----	0	1	1	1	1	1	1	1	1	1	1	1	1	1	1	1	1	1	1	1	1	1	1	1	1	1	1	1	1	1	1
hraného	Gtis2x	NNNS6----------	NNNS6----------	NNNS6----------	NNNS6----------	NNNS6----------	AAIS2----1A----	AAIS2----1A----	0	1	1	1	1	0	0	1	1	1	1	0	0	1	1	1	1	0	0	1	1	1	1	1	1	1	1	1	1	0	0
filmu	SSis2	NNIS2----------	NNIS2----------	NNIS2----------	NNIS2----------	NNIS2----------	NNIS2-----A----	NNIS2-----A----	0	1	1	1	1	1	1	1	1	1	1	1	1	1	1	1	1	1	1	1	1	1	1	1	1	1	1	1	1	1	1
známeho	AAis2x	AAIS2----1-----	AAIS2----1-----	AAIS2----1-----	AAIS2----1-----	AAIS2----1-----	AAIS2----1A----	AAIS2----1A----	0	1	1	1	1	1	1	1	1	1	1	1	1	1	1	1	1	1	1	1	1	1	1	1	1	1	1	1	1	1	1
z	Eu2	RR--2----------	RR--2-----------	RR--2-----------	RR--2-----------	RR--2-----------	RR--2----------	RR--2----------	0	1	1	1	1	1	1	1	1	1	1	1	1													1	1	1	1	1	1
kín	SSnp2	NNNP2----------	NNNP2----------	NNNP2----------	NNFP2----------	NNNP2----------	NNNP2-----A----	NNNP2-----A----	0	1	1	1	1	1	1	1	1	1	1	1	1	1	1	0	1	1	1	1	1	1	1	1	1	1	1	1	1	1	1
je	VKesc+	VB-S---3P-AA---	V--S---3P-AA---	V--S---3P-AA---	V--S---3P-AA---	V--S---3P-AA---	VB-S---3P-AA---	VB-S---3P-AA---	0	1	1	1	1	1	1					1	1							1	1	1	1	1	1							1	1	1	1	1	1	1	1	1	1
nezvyčajné	AAns1x	AANS1----1-----	AANS1----1-----	AANS1----1-----	AANS1----1-----	AANS1----1-----	AANS1----1A----	AANS1----1A----	0	1	1	1	1	1	1	1	1	1	1	1	1	1	1	1	1	1	1	1	1	1	1	1	1	1	1	1	1	1	1
HVIEZDY	SSfp1	NNFP1----------	NNFS2----------	NNFP1----------	NNFP1----------	NNFP1----------	NNFP1-----A----	NNFP1-----A----	0	1	1	1	1	1	1	1	1	1	1	1	1	1	1	1	1	1	1	0	1	1	1	1	1	0	1	1	1	1	1
STOROČIA	SSns2	NNNS2----------	NNNS2----------	NNNS2----------	NNNS2----------	NNNS2----------	NNNS2-----A----	NNNS2-----A----	0	1	1	1	1	1	1	1	1	1	1	1	1	1	1	1	1	1	1	1	1	1	1	1	1	1	1	1	1	1	1
Kritérium	SSns1	NNNS1----------	NNNS1----------	NNNS1----------	NNNS1----------	NNNS1----------	NNNS1-----A----	NNNS1-----A----	0	1	1	1	1	1	1	1	1	1	1	1	1	1	1	1	1	1	1	1	1	1	1	1	1	1	1	1	1	1	1
je	VKesc+	VB-S---3P-AA---	V--S---3P-AA---	V--S---3P-AA---	V--S---3P-AA---	V--S---3P-AA---	VB-S---3P-AA---	VB-S---3P-AA---	0	1	1	1	1	1	1					1	1							1	1	1	1	1	1							1	1	1	1	1	1	1	1	1	1
dosť	Dx	Db-------1-----	Db-------1-----	Db-------1-----	Db-------1-----	Db-------1-----	Db-------------	Db-------------	0	1	1	1	1	1	1	1	1	1	1	1	1
kontroverzné	AAns1x	AANS1----1-----	AANS1----1-----	AANS1----1-----	AANS1----1-----	AANS1----1-----	AANS1----1A----	AANS1----1A----	0	1	1	1	1	1	1	1	1	1	1	1	1	1	1	1	1	1	1	1	1	1	1	1	1	1	1	1	1	1	1
Sú	VKepc+	VB-P---3P-AA---	V--P---3P-AA---	V--P---3P-AA---	V--P---3P-AA---	V--P---3P-AA---	VB-P---3P-AA---	VB-P---3P-AA---	0	1	1	1	1	1	1					1	1							1	1	1	1	1	1							1	1	1	1	1	1	1	1	1	1
v	Eu6	RR--6----------	RR--6-----------	RR--6-----------	RR--6-----------	RR--6-----------	RR--6----------	RR--6----------	0	1	1	1	1	1	1	1	1	1	1	1	1													1	1	1	1	1	1
ňom	PFis6	PDIS6----------	PDIS6----------	PDMS6----------	PDMS6----------	PDIS6----------	PPMS6--3-------	PPMS6--3-------	0	1	1	1	1	1	1	1	1	1	1	0	0	1	0	0	1	0	0	1	1	1	1	1	1	1	1	1	1	1	1
i	T	TT-------------	J^-------------	J^-------------	J^-------------	TT-------------	J^-------------	J^-------------	0	0	0	0	1	0	0	0	0	0	1	0	0
Greta	SSfs1:r	NNFS1----------	NNFS1----------	NNFS1----------	NNFS1----------	NNFS1----------	NNMS1-----A----	X@-------------	0	1	1	1	1	1	0	1	1	1	1	1	0	1	1	1	1	0		1	1	1	1	1		1	1	1	1	1
Garbo	SUfs1:r	NxFS1----------	NxFS1----------	NxFS1----------	NxFS1----------	NxFS1----------	NNMS1-----A----	X@-------------	0	1	1	1	1	1	0	1	1	1	1	0	0	1	1	1	1	0		1	1	1	1	1		1	1	1	1	1
Betty	SUfs1:r	NxFS1----------	NxFS1----------	NxFS1----------	NxFS1----------	NxFS1----------	NNMS1-----A----	X@-------------	0	1	1	1	1	1	0	1	1	1	1	0	0	1	1	1	1	0		1	1	1	1	1		1	1	1	1	1
Grable	SUfs1:r	NxFS1----------	NxFS1----------	NxFS1----------	NxFS1----------	NxFS1----------	NNMS1-----A----	X@-------------	0	1	1	1	1	1	0	1	1	1	1	0	0	1	1	1	1	0		1	1	1	1	1		1	1	1	1	1
Lucille	SUfs1:r	NxFS1----------	NxFS1----------	NxFS1----------	NxFS1----------	NxFS1----------	NNMS1-----A----	X@-------------	0	1	1	1	1	1	0	1	1	1	1	0	0	1	1	1	1	0		1	1	1	1	1		1	1	1	1	1
Ball	SUfs1:r	NxFS1----------	NxFS1----------	NxFS1----------	NxFS1----------	NxFS1----------	NNMS1-----A----	X@-------------	0	1	1	1	1	1	0	1	1	1	1	0	0	1	1	1	1	0		1	1	1	1	1		1	1	1	1	1
Hedy	SUfs1:r	NxFS1----------	NxFS1----------	NxFS1----------	NxFS1----------	NxFS1----------	NNMS1-----A----	X@-------------	0	1	1	1	1	1	0	1	1	1	1	0	0	1	1	1	1	0		1	1	1	1	1		1	1	1	1	1
Lamar	SUfs1:r	NxFS1----------	NxFS1----------	NxFS1----------	NxFS1----------	NxFS1----------	NNMS1-----A----	X@-------------	0	1	1	1	1	1	0	1	1	1	1	0	0	1	1	1	1	0		1	1	1	1	1		1	1	1	1	1
Mary	SUfs1:r	NxFS1----------	NxFS1----------	NxFS1----------	NxFS1----------	NxFS1----------	NNFS2-----A----	NNFS2-----A----	0	1	1	1	1	1	1	1	1	1	1	0	0	1	1	1	1	1	1	1	1	1	1	1	1	1	1	1	1	0	0
Pickford	SUfs1:r	NxFS1----------	NxFS1----------	NxFS1----------	NxFS1----------	NxFS1----------	NNIS1-----A----	X@-------------	0	1	1	1	1	1	0	1	1	1	1	0	0	1	1	1	1	0		1	1	1	1	1		1	1	1	1	1
Ruth	SUfs1:r	NxFS1----------	NxFS1----------	NxFS1----------	NxFS1----------	NxFS1----------	NNMS1-----A----	X@-------------	0	1	1	1	1	1	0	1	1	1	1	0	0	1	1	1	1	0		1	1	1	1	1		1	1	1	1	1
Gordon	SUfs1:r	NxFS1----------	NxFS1----------	NxFS1----------	NxFS1----------	NxFS1----------	NNMS1-----A----	X@-------------	0	1	1	1	1	1	0	1	1	1	1	0	0	1	1	1	1	0		1	1	1	1	1		1	1	1	1	1
a	O	J^-------------	J^-------------	J^-------------	J^-------------	J^-------------	J^-------------	J^-------------	0	1	1	1	1	1	1	1	1	1	1	1	1
Dinah	SUfs1:r	NxFS1----------	NxFS1----------	NxFS1----------	NxFS1----------	NxFS1----------	NNMS1-----A----	X@-------------	0	1	1	1	1	1	0	1	1	1	1	0	0	1	1	1	1	0		1	1	1	1	1		1	1	1	1	1
Shore	SUfs1:r	NxFS1----------	NxFS1----------	NxFS1----------	NxFS1----------	NxFS1----------	NNMS1-----A----	X@-------------	0	1	1	1	1	1	0	1	1	1	1	0	0	1	1	1	1	0		1	1	1	1	1		1	1	1	1	1
Medzi	Eu7	RR--7----------	RR--7-----------	RR--7-----------	RR--7-----------	RR--7-----------	RR--7----------	RR--7----------	0	1	1	1	1	1	1	1	1	1	1	1	1													1	1	1	1	1	1
hereckými	AAmp7x	AAMP7----1-----	AAMP7----1-----	AAMP7----1-----	AAMP7----1-----	AAMP7----1-----	AAMP7----1A----	AAMP7----1A----	0	1	1	1	1	1	1	1	1	1	1	1	1	1	1	1	1	1	1	1	1	1	1	1	1	1	1	1	1	1	1
kandidátmi	SSmp7	NNMP7----------	NNMP7----------	NNMP7----------	NNMP7----------	NNMP7----------	NNMP7-----A----	NNMP7-----A----	0	1	1	1	1	1	1	1	1	1	1	1	1	1	1	1	1	1	1	1	1	1	1	1	1	1	1	1	1	1	1
sú	VKepc+	VB-P---3P-AA---	V--P---3P-AA---	V--P---3P-AA---	V--P---3P-AA---	V--P---3P-AA---	VB-P---3P-AA---	VB-P---3P-AA---	0	1	1	1	1	1	1					1	1							1	1	1	1	1	1							1	1	1	1	1	1	1	1	1	1
Humphrey	SFms1:r	NxMS1----------	NxMS1----------	NxMS1----------	NNMS1----------	NxMS1----------	NNMS1-----A----	X@-------------	0	1	1	1	1	1	0	1	1	0	1	0	0	1	1	1	1	1		1	1	1	1	1		1	1	1	1	1
Bogart	SFms1:r	NxMS1----------	NNMS1----------	NxMS1----------	NNMS1----------	NNMS1----------	NNMS1-----A----	X@-------------	0	1	1	1	1	1	0	0	1	0	0	0	0	1	1	1	1	1		1	1	1	1	1		1	1	1	1	1
Sidney	SFms1:r	NxMS1----------	NxMS1----------	NxMS1----------	NNMS1----------	NxMS1----------	NNMS1-----A----	X@-------------	0	1	1	1	1	1	0	1	1	0	1	0	0	1	1	1	1	1		1	1	1	1	1		1	1	1	1	1
Poitier	SFms1:r	NxMS1----------	NNMS1----------	NNMS1----------	NxMS1----------	NNMS1----------	NNMS1-----A----	X@-------------	0	1	1	1	1	1	0	0	0	1	0	0	0	1	1	1	1	1		1	1	1	1	1		1	1	1	1	1
Kirk	SSms1:r	NNMS1----------	NNMS1----------	NNMS1----------	NNMS1----------	NNMS1----------	NNMS1-----A----	X@-------------	0	1	1	1	1	1	0	1	1	1	1	1	0	1	1	1	1	1		1	1	1	1	1		1	1	1	1	1
Douglas	SSms1:r	NNMS1----------	NNMS1----------	NNMS1----------	NNMS1----------	NNMS1----------	NNMS1-----A----	X@-------------	0	1	1	1	1	1	0	1	1	1	1	1	0	1	1	1	1	1		1	1	1	1	1		1	1	1	1	1
Harold	SSms1:r	NNMS1----------	NNMS1----------	NNMS1----------	NNMS1----------	NNMS1----------	NNMS1-----A----	X@-------------	0	1	1	1	1	1	0	1	1	1	1	1	0	1	1	1	1	1		1	1	1	1	1		1	1	1	1	1
Lloyd	SSms1:r	NNMS1----------	NNMS1----------	NNMS1----------	NNMS1----------	NNMS1----------	NNMS1-----A----	NNMS1-----A----	0	1	1	1	1	1	1	1	1	1	1	1	1	1	1	1	1	1	1	1	1	1	1	1	1	1	1	1	1	1	1
Sir	SSms1	NNMS1----------	NNMS1----------	NNMS1----------	NNMS1----------	NNMS1----------	NNMS1-----A----	NNMS1-----A----	0	1	1	1	1	1	1	1	1	1	1	1	1	1	1	1	1	1	1	1	1	1	1	1	1	1	1	1	1	1	1
Laurence	SSms1:r	NNMS1----------	NNMS1----------	NNMS1----------	NNMS1----------	NNMS1----------	NNMS1-----A----	X@-------------	0	1	1	1	1	1	0	1	1	1	1	1	0	1	1	1	1	1		1	1	1	1	1		1	1	1	1	1
Olivier	SSms1:r	NNMS1----------	NNMS1----------	NNMS1----------	NNMS1----------	NNMS1----------	NNMS1-----A----	X@-------------	0	1	1	1	1	1	0	1	1	1	1	1	0	1	1	1	1	1		1	1	1	1	1		1	1	1	1	1
a	O	J^-------------	J^-------------	J^-------------	J^-------------	J^-------------	J^-------------	J^-------------	0	1	1	1	1	1	1	1	1	1	1	1	1
John	SSms1:r	NNMS1----------	NNMS1----------	NNMS1----------	NNMS1----------	NNMS1----------	NNMS1-----A----	NNMS1-----A----	0	1	1	1	1	1	1	1	1	1	1	1	1	1	1	1	1	1	1	1	1	1	1	1	1	1	1	1	1	1	1
Belushi	SFms1:r	NxMS1----------	NxMS1----------	NxMS1----------	NNMS1----------	NxMS1----------	NNMS1-----A----	X@-------------	0	1	1	1	1	1	0	1	1	0	1	0	0	1	1	1	1	1		1	1	1	1	1		1	1	1	1	1
Stane	VKdsc+	VB-S---3P-AN---	V--S---3P-AN---	V--S---3P-AN---	V--S---3P-AN---	V--S---3P-AN---	VB-S---3P-AA---	VB-S---3P-AA---	0	1	1	1	1	1	1					1	1							1	1	1	1	1	1							1	1	1	1	1	1	1	1	1	1
sa	R	VB-S---3P-AN---	V--S---3P-AN---	V--S---3P-AN---	V--S---3P-AN---	V--S---3P-AN---	P7-X4----------	P7-X4----------	0	1	1	1	1	0	0					0	0							1	1	1	1	0	0							1	1	1	1			1	1	1	1
tak	T	TT-------------	TT-------------	PY-------------	PY-------------	TT-------------	Db-------------	Db-------------	0	1	0	0	1	0	0	1	0	0	1	0	0
počas	Eu2	RR--2----------	RR--2-----------	RR--2-----------	RR--2-----------	RR--2-----------	RR--2----------	RR--2----------	0	1	1	1	1	1	1	1	1	1	1	1	1													1	1	1	1	1	1
slávnostného	AAis2x	AAIS2----1-----	AAIS2----1-----	AAIS2----1-----	AAIS2----1-----	AAIS2----1-----	AAIS2----1A----	AAIS2----1A----	0	1	1	1	1	1	1	1	1	1	1	1	1	1	1	1	1	1	1	1	1	1	1	1	1	1	1	1	1	1	1
ceremoniálu	SSis2	NNIS2----------	NNIS2----------	NNIS2----------	NNIS2----------	NNIS2----------	NNIS2-----A----	NNIS2-----A----	0	1	1	1	1	1	1	1	1	1	1	1	1	1	1	1	1	1	1	1	1	1	1	1	1	1	1	1	1	1	1
teda	O	J^-------------	J^-------------	TT-------------	J^-------------	J^-------------	J^-------------	J^-------------	0	1	0	1	1	1	1	1	0	1	1	1	1
dva	NNip4	CxIP4----------	CxIP4----------	CxIP4----------	CxIP4----------	CxIP4----------	ClIP4----------	ClIP4----------	0	1	1	1	1	1	1	1	1	1	1	0	0	1	1	1	1	1	1	1	1	1	1	1	1	1	1	1	1	1	1
dni	SSip4	NNIP4----------	NNIP4----------	NNIP4----------	NNIP4----------	NNIP4----------	NNIP4-----A----	NNIP4-----A----	0	1	1	1	1	1	1	1	1	1	1	1	1	1	1	1	1	1	1	1	1	1	1	1	1	1	1	1	1	1	1
pred	Eu7	RR--7----------	RR--7-----------	RR--7-----------	RR--7-----------	RR--7-----------	RR--7----------	RR--7----------	0	1	1	1	1	1	1	1	1	1	1	1	1													1	1	1	1	1	1
začiatkom	SSis7	NNIS7----------	NNIS7----------	NNIS7----------	NNIS7----------	NNIS7----------	NNIS7-----A----	NNIS7-----A----	0	1	1	1	1	1	1	1	1	1	1	1	1	1	1	1	1	1	1	1	1	1	1	1	1	1	1	1	1	1	1
MFF	W	NNIS7----------	NNIS7----------	NNIS7----------	NNIS7----------	NNIS7----------	NNIXX-----A---8	X@-------------	0	1	1	1	1	1	0	1	1	1	1	1	0	1	1	1	1	1		1	1	1	1	0		1	1	1	1	0
v	Eu6	RR--6----------	RR--6-----------	RR--6-----------	RR--6-----------	RR--6-----------	RR--6----------	RR--6----------	0	1	1	1	1	1	1	1	1	1	1	1	1													1	1	1	1	1	1
Berlíne	SSis6:r	NNIS6----------	NNIS6----------	NNIS6----------	NNIS6----------	NNIS6----------	NNIS6-----A----	NNIS6-----A----	0	1	1	1	1	1	1	1	1	1	1	1	1	1	1	1	1	1	1	1	1	1	1	1	1	1	1	1	1	1	1
SPIELBERG	SSms1:r	NNMS1----------	NNIS6----------	NNMS1----------	NNMS1----------	NNMS1----------	NNMS1-----A----	X@-------------	0	1	1	1	1	1	0	1	1	1	1	1	0	0	1	1	1	1		1	1	1	1	1		0	1	1	1	1
PREPUSTIL	VLdscm+	V-MS---3R-AN---	V-IS---3R-AN---	V-MS---3R-AN---	V-MS---3R-AN---	V-MS---3R-AN---	VpYS---XR-AA---	VpYS---XR-AA---	0	1	1	1	1	1	1							0	1	1	1	0	0	1	1	1	1	1	1							1	1	1	1	0	0	1	1	1	1
KAMERAMANA	SSms4	NNMS4----------	V-IS---3R-AN---	NNMS4----------	NNMS4----------	NNMS4----------	NNMS4-----A----	NNMS4-----A----	0	0	1	1	1	1	1		1	1	1	1	1	0	1	1	1	1	1	1	1	1	1	1	1		1	1	1	1	1
TRAKTOR	SSis1	NNIS1----------	NNIS1----------	NNIS1----------	NNIS4----------	NNIS4----------	NNIS1-----A----	NNIS1-----A----	0	1	1	1	1	1	1	1	1	1	1	1	1	1	1	1	1	1	1	1	1	1	1	1	1	1	1	0	0	1	1
NAKRÚCA	VKesc+	VB-S---3P-AA---	NNIS1----------	V--S---3P-AA---	V--S---3P-AA---	V--S---3P-AA---	VB-S---3P-AA---	VB-S---3P-AA---	0	0	1	1	1	1	1	0				1	1							1	1	1	1	1	1								1	1	1	1	1		1	1	1
Jeho	PUis1	PZIS1----------	PZIS1----------	PZIS1----------	PZIS1----------	PZIS1----------	PSXXXIS3-------	PSXXXIS3-------	0	1	1	1	1	1	1	1	1	1	1	0	0	1	1	1	1	0	0	1	1	1	1	0	0	1	1	1	1	0	0
dej	SSis1	NNIS1----------	NNIS1----------	NNIS1----------	NNIS1----------	NNIS1----------	NNIS1-----A----	NNIS1-----A----	0	1	1	1	1	1	1	1	1	1	1	1	1	1	1	1	1	1	1	1	1	1	1	1	1	1	1	1	1	1	1
sa	R	NNIS1----------	NNIS1----------	NNIS1----------	NNIS1----------	NNIS1----------	P7-X4----------	P7-X4----------	0	1	1	1	1	0	0	1	1	1	1	0	0	1	1	1	1			1	1	1	1	0	0	1	1	1	1	0	0
odohráva	VKesc+	VB-S---3P-AA---	V--S---3P-AA---	V--S---3P-AA---	V--S---3P-AA---	V--S---3P-AA---	VB-S---3P-AA---	VB-S---3P-AA---	0	1	1	1	1	1	1					1	1							1	1	1	1	1	1							1	1	1	1	1	1	1	1	1	1
vo	Ev6	RV--6----------	RV--6-----------	RV--6-----------	RV--6-----------	RV--6-----------	RV--6----------	RV--6----------	0	1	1	1	1	1	1	1	1	1	1	1	1													1	1	1	1	1	1
fiktívnom	AAns6x	AANS6----1-----	AANS6----1-----	AANS6----1-----	AANS6----1-----	AANS6----1-----	AANS6----1A----	AANS6----1A----	0	1	1	1	1	1	1	1	1	1	1	1	1	1	1	1	1	1	1	1	1	1	1	1	1	1	1	1	1	1	1
mužstve	SSns6	NNNS6----------	NNNS6----------	NNNS6----------	NNNS6----------	NNNS6----------	NNNS6-----A----	NNNS6-----A----	0	1	1	1	1	1	1	1	1	1	1	1	1	1	1	1	1	1	1	1	1	1	1	1	1	1	1	1	1	1	1
Miami	SUns1:r	NxNS1----------	NxNS1----------	NNNS6----------	NNNS6----------	NxNS1----------	NNNXX-----A----	X@-------------	0	1	1	1	1	1	0	1	0	0	1	0	0	1	1	1	1	1		1	1	1	1	0		1	0	0	1	0
Sharks	%	NxNS1----------	NxNS1----------	NNNS6----------	NNNS6----------	NxNS1----------	NNMPX-----A----	X@-------------	0	1	1	1	1	1	0	1	0	0	1	0	0	1	1	1	1	0		1	1	1	1	0		1	0	0	1	0
Dobrosrdečná	AAfs1x	AAFS1----1-----	AAFS1----1-----	AAFS1----1-----	AAFS1----1-----	AAFS1----1-----	AAFS1----1A----	AAFS1----1A----	0	1	1	1	1	1	1	1	1	1	1	1	1	1	1	1	1	1	1	1	1	1	1	1	1	1	1	1	1	1	1
dievčina	SSfs1	NNFS1----------	NNFS1----------	NNFS1----------	NNFS1----------	NNFS1----------	NNFS1-----A----	NNFS1-----A----	0	1	1	1	1	1	1	1	1	1	1	1	1	1	1	1	1	1	1	1	1	1	1	1	1	1	1	1	1	1	1
sa	R	NNFS1----------	NNFS1----------	NNFS1----------	NNFS1----------	NNFS1----------	P7-X4----------	P7-X4----------	0	1	1	1	1	0	0	1	1	1	1	0	0	1	1	1	1			1	1	1	1	0	0	1	1	1	1	0	0
mu	PFms3	PDMS3----------	PDMS3----------	PDMS3----------	PDMS3----------	PDMS3----------	PHMS3--3-------	PHMS3--3-------	0	1	1	1	1	1	1	1	1	1	1	0	0	1	1	1	1	1	1	1	1	1	1	1	1	1	1	1	1	1	1
však	T	TT-------------	TT-------------	TT-------------	TT-------------	TT-------------	J^-------------	J^-------------	0	1	1	1	1	0	0	1	1	1	1	0	0
neustála	Dx:q	Db-------1-----	Db-------1-----	Db-------1-----	AAFS1----1-----	Db-------1-----	AAFS1----1N----	AAFS1----1N----	0	1	1	0	1	0	0	1	1	0	1	0	0
snaží	VKesc+	VB-S---3P-AA---	V--S---3P-AA---	V--S---3P-AA---	V--S---3P-AA---	V--S---3P-AA---	VB-S---3P-AA---	VB-S---3P-AA---	0	1	1	1	1	1	1					1	1							1	1	1	1	1	1							1	1	1	1	1	1	1	1	1	1
dohodiť	VId+	Vf--------AN---	Vf--------AN---	Vf--------AN---	Vf--------AN---	Vf--------AN---	Vf--------A----	Vf--------A----	0	1	1	1	1	1	1	1	1	1	1	1	1
nejakého	PAms4	P4MS4----------	P4MS4----------	P4MS4----------	P4MS4----------	P4MS4----------	PZMS4----------	PZMS4----------	0	1	1	1	1	1	1	1	1	1	1	0	0	1	1	1	1	1	1	1	1	1	1	1	1	1	1	1	1	1	1
priateľa	SSms4	NNMS4----------	NNMS4----------	NNMS4----------	NNMS4----------	NNMS4----------	NNMS4-----A----	NNMS4-----A----	0	1	1	1	1	1	1	1	1	1	1	1	1	1	1	1	1	1	1	1	1	1	1	1	1	1	1	1	1	1	1
Chcel	VLescm+	V-MS---3R-AA---	V-MS---3R-AA---	V-MS---3R-AA---	V-MS---3R-AA---	V-MS---3R-AA---	VpYS---XR-AA---	VpYS---XR-AA---	0	1	1	1	1	1	1							1	1	1	1	0	0	1	1	1	1	1	1							1	1	1	1	0	0	1	1	1	1
by	Y	V-MS---3R-AA---	V-MS---3R-AA---	V-MS---3R-AA---	V-MS---3R-AA---	V-MS---3R-AA---	Vc-------------	Vc-------------	0	1	1	1	1	1	1							1	1	1	1			1	1	1	1									1	1	1	1			1	1	1	1
sa	R	V-MS---3R-AA---	V-MS---3R-AA---	V-MS---3R-AA---	V-MS---3R-AA---	V-MS---3R-AA---	P7-X4----------	P7-X4----------	0	1	1	1	1	0	0							1	1	1	1			1	1	1	1	0	0							1	1	1	1			1	1	1	1
stať	VId+	Vf--------AN---	Vf--------AN---	Vf--------AN---	Vf--------AN---	Vf--------AN---	Vf--------A----	Vf--------A----	0	1	1	1	1	1	1	1	1	1	1	1	1
prezidentom	SSms7	NNMS7----------	NNMS7----------	NNMS7----------	NNMS7----------	NNMS7----------	NNMS7-----A----	NNMS7-----A----	0	1	1	1	1	1	1	1	1	1	1	1	1	1	1	1	1	1	1	1	1	1	1	1	1	1	1	1	1	1	1
USA	W	NNMS7----------	NNMS7----------	NNMS7----------	NNMS7----------	NNMS7----------	NNIXX-----A----	NNIXX-----A----	0	1	1	1	1	1	1	1	1	1	1	1	1	1	1	1	1	0	0	1	1	1	1	0	0	1	1	1	1	0	0
ZOMREL	VLdscm+	V-MS---3R-AN---	V-MS---3R-AN---	V-MS---3R-AN---	V-MS---3R-AN---	V-MS---3R-AN---	VpYS---XR-AA---	VpYS---XR-AA---	0	1	1	1	1	1	1							1	1	1	1	0	0	1	1	1	1	1	1							1	1	1	1	0	0	1	1	1	1
JOHN	SSms1:r	NNMS1----------	NNMS1----------	NNMS1----------	NNMS1----------	NNMS1----------	NNMS1-----A----	NNMS1-----A----	0	1	1	1	1	1	1	1	1	1	1	1	1	1	1	1	1	1	1	1	1	1	1	1	1	1	1	1	1	1	1
ADDISON	SSms1:r	NNMS1----------	NNMS1----------	NNMS1----------	NNMS1----------	NNMS1----------	NNMS1-----A----	X@-------------	0	1	1	1	1	1	0	1	1	1	1	1	0	1	1	1	1	1		1	1	1	1	1		1	1	1	1	1
TARANTINO	SSms1:r	NNMS1----------	NNMS1----------	NNMS1----------	NNMS1----------	NNMS1----------	NNMS1-----A----	X@-------------	0	1	1	1	1	1	0	1	1	1	1	1	0	1	1	1	1	1		1	1	1	1	1		1	1	1	1	1
V	Eu6	RR--6----------	RR--6-----------	RR--6-----------	RR--6-----------	RR--6-----------	RR--6----------	RR--6----------	0	1	1	1	1	1	1	1	1	1	1	1	1													1	1	1	1	1	1
DIVADLE	SSns6	NNNS6----------	NNNS6----------	NNNS6----------	NNNS6----------	NNNS6----------	NNNS6-----A----	NNNS6-----A----	0	1	1	1	1	1	1	1	1	1	1	1	1	1	1	1	1	1	1	1	1	1	1	1	1	1	1	1	1	1	1
Jeho	PUfs4	PZFS4----------	PZFS4----------	PZFS4----------	PZFS4----------	PZFS4----------	PSXXXIS3-------	PSXXXIS3-------	0	1	1	1	1	1	1	1	1	1	1	0	0	1	1	1	1	0	0	1	1	1	1	0	0	1	1	1	1	0	0
slepú	AAfs4x	AAFS4----1-----	AAFS4----1-----	AAFS4----1-----	AAFS4----1-----	AAFS4----1-----	AAFS4----1A----	AAFS4----1A----	0	1	1	1	1	1	1	1	1	1	1	1	1	1	1	1	1	1	1	1	1	1	1	1	1	1	1	1	1	1	1
obeť	SSfs4	NNFS4----------	NNFS4----------	NNFS4----------	NNFS4----------	NNFS4----------	NNFS4-----A----	NNFS4-----A----	0	1	1	1	1	1	1	1	1	1	1	1	1	1	1	1	1	1	1	1	1	1	1	1	1	1	1	1	1	1	1
hrá	VKesc+	VB-S---3P-AA---	V--S---3P-AA---	V--S---3P-AA---	V--S---3P-AA---	V--S---3P-AA---	VB-S---3P-AA---	VB-S---3P-AA---	0	1	1	1	1	1	1					1	1							1	1	1	1	1	1							1	1	1	1	1	1	1	1	1	1
Marisa	SSfs1:r	NNFS1----------	NNFS1----------	NNFS1----------	NNFS1----------	NNFS1----------	NNMS1-----A----	X@-------------	0	1	1	1	1	1	0	1	1	1	1	1	0	1	1	1	1	0		1	1	1	1	1		1	1	1	1	1
Tomei	SUfs1:r	NxFS1----------	NxFS1----------	NxFS1----------	NNFS1----------	NxFS1----------	NNMS1-----A----	X@-------------	0	1	1	1	1	1	0	1	1	0	1	0	0	1	1	1	1	0		1	1	1	1	1		1	1	1	1	1
NAHÁČI	SSmp1	NNMP1----------	NNMP1----------	NNMP1----------	NNMS1----------	NNMP1----------	NNMP1-----A----	NNMP1-----A----	0	1	1	1	1	1	1	1	1	1	1	1	1	1	1	1	1	1	1	1	1	0	1	1	1	1	1	1	1	1	1
POTOPILI	VLdpcm+	V-MP---3R-AN---	V-MP---3R-AN---	V-MP---3R-AN---	V-FP---3R-AN---	V-MP---3R-AN---	VpXP---XR-AA---	VpXP---XR-AA---	0	1	1	1	1	1	1							1	1	0	1	0	0	1	1	1	1	1	1							1	1	1	1	0	0	1	1	1	1
TITANIC	SSis4:r	NNIS4----------	NNIS4----------	NNIS4----------	NNIS4----------	NNIS4----------	NNIXX-----A---8	X@-------------	0	1	1	1	1	1	0	1	1	1	1	1	0	1	1	1	1	1		1	1	1	1	0		1	1	1	1	0
V	Eu4	RR--4----------	RR--4-----------	RR--4-----------	RR--4-----------	RR--4-----------	RR--4----------	RR--4----------	0	1	1	1	1	1	1	1	1	1	1	1	1													1	1	1	1	1	1
nedeľu	SSfs4	NNFS4----------	NNFS4----------	NNFS4----------	NNFS4----------	NNFS4----------	NNFS4-----A----	NNFS4-----A----	0	1	1	1	1	1	1	1	1	1	1	1	1	1	1	1	1	1	1	1	1	1	1	1	1	1	1	1	1	1	1
boli	VLepcf+	V-FP---3R-AA---	V-FP---3R-AA---	V-FP---3R-AA---	V-FP---3R-AA---	V-FP---3R-AA---	VpXP---XR-AA---	VpXP---XR-AA---	0	1	1	1	1	1	1							1	1	1	1	0	0	1	1	1	1	1	1							1	1	1	1	0	0	1	1	1	1
udeľované	Gtfp1x	V-FP---3R-AA---	V-FP---3R-AA---	V-FP---3R-AA---	V-FP---3R-AA---	V-FP---3R-AA---	VsIP---XX-AP---	AAFP1----1A----	0	1	1	1	1	1	0							1	1	1	1	0	1	1	1	1	1	1	1							1	1	1	1	0		1	1	1	1
ceny	SSfp1	NNFP1----------	NNFP1----------	NNFP1----------	NNFP1----------	NNFP1----------	NNFP1-----A----	NNFP1-----A----	0	1	1	1	1	1	1	1	1	1	1	1	1	1	1	1	1	1	1	1	1	1	1	1	1	1	1	1	1	1	1
Screen	%	NNFP1----------	NNFP1----------	NNFP1----------	NNFP1----------	NNFP1----------	NNMS2-----A----	X@-------------	0	1	1	1	1	1	0	1	1	1	1	1	0	1	1	1	1	0		1	1	1	1	0		1	1	1	1	0
Actors	%	NNFP1----------	NNFP1----------	NNFP1----------	NNFP1----------	NNFP1----------	NNMS2-----A----	X@-------------	0	1	1	1	1	1	0	1	1	1	1	1	0	1	1	1	1	0		1	1	1	1	0		1	1	1	1	0
Guild	%	NNFP1----------	NNFP1----------	NNFP1----------	NNFP1----------	NNFP1----------	NNMS2-----A----	X@-------------	0	1	1	1	1	1	0	1	1	1	1	1	0	1	1	1	1	0		1	1	1	1	0		1	1	1	1	0
Skvelá	AAfs1x	AAFS1----1-----	AAFS1----1-----	AAFS1----1-----	AAFS1----1-----	AAFS1----1-----	AAFS1----1A----	AAFS1----1A----	0	1	1	1	1	1	1	1	1	1	1	1	1	1	1	1	1	1	1	1	1	1	1	1	1	1	1	1	1	1	1
novinka	SSfs1	NNFS1----------	NNFS1----------	NNFS1----------	NNFS1----------	NNFS1----------	NNFS1-----A----	NNFS1-----A----	0	1	1	1	1	1	1	1	1	1	1	1	1	1	1	1	1	1	1	1	1	1	1	1	1	1	1	1	1	1	1
pre	Eu4	RR--4----------	RR--4-----------	RR--4-----------	RR--4-----------	RR--4-----------	RR--4----------	RR--4----------	0	1	1	1	1	1	1	1	1	1	1	1	1													1	1	1	1	1	1
fanúšikov	SSmp4	NNMP4----------	NNMP4----------	NNMP4----------	NNMP4----------	NNMP4----------	NNMP4-----A----	NNMP4-----A----	0	1	1	1	1	1	1	1	1	1	1	1	1	1	1	1	1	1	1	1	1	1	1	1	1	1	1	1	1	1	1
hororej	AAfs2x:q	AAFS2----1-----	AAFS2----1-----	AAFS2----1-----	AAFS2----1-----	AAFS2----1-----	NNFS2-----A----	X@-------------	0	1	1	1	1	0	0	1	1	1	1	0	0	1	1	1	1	1		1	1	1	1	1		1	1	1	1	1
klasiky	SSfs2	NNFS2----------	NNFS2----------	NNFS2----------	NNFS2----------	NNFS2----------	NNFS2-----A----	NNFS2-----A----	0	1	1	1	1	1	1	1	1	1	1	1	1	1	1	1	1	1	1	1	1	1	1	1	1	1	1	1	1	1	1
z	Eu2	RR--2----------	RR--2-----------	RR--2-----------	RR--2-----------	RR--2-----------	RR--2----------	RR--2----------	0	1	1	1	1	1	1	1	1	1	1	1	1													1	1	1	1	1	1
roku	SSis2	NNIS2----------	NNIS2----------	NNIS2----------	NNIS2----------	NNIS2----------	NNIS6-----A----	NNIS6-----A----	0	1	1	1	1	1	1	1	1	1	1	1	1	1	1	1	1	1	1	1	1	1	1	1	1	1	1	1	1	0	0
David	SSms1:r	NNMS1----------	NNMS1----------	NNMS1----------	NNMS1----------	NNMS1----------	NNMS1-----A----	NNMS1-----A----	0	1	1	1	1	1	1	1	1	1	1	1	1	1	1	1	1	1	1	1	1	1	1	1	1	1	1	1	1	1	1
Duchovny	SUms1:r	NxMS1----------	NxMS1----------	NxMS1----------	NNMS1----------	NxMS1----------	NNMS1-----A----	X@-------------	0	1	1	1	1	1	0	1	1	0	1	0	0	1	1	1	1	1		1	1	1	1	1		1	1	1	1	1
a	O	J^-------------	J^-------------	J^-------------	J^-------------	J^-------------	J^-------------	J^-------------	0	1	1	1	1	1	1	1	1	1	1	1	1
Gillian	SUfs1:r	NxFS1----------	NNMS1----------	NxFS1----------	NxFS1----------	NxFS1----------	NNMS1-----A----	X@-------------	0	1	1	1	1	1	0	0	1	1	1	0	0	0	1	1	1	0		1	1	1	1	1		1	1	1	1	1
Anderson	SUfs1:r	NxFS1----------	NNMS1----------	NxFS1----------	NxFS1----------	NxFS1----------	NNMS1-----A----	X@-------------	0	1	1	1	1	1	0	0	1	1	1	0	0	0	1	1	1	0		1	1	1	1	1		1	1	1	1	1
totiž	T	TT-------------	TT-------------	TT-------------	TT-------------	TT-------------	J^-------------	J^-------------	0	1	1	1	1	0	0	1	1	1	1	0	0
podpísali	VLdpco+	V-XP---3R-AN---	V-MP---3R-AN---	V-FP---3R-AN---	V-FP---3R-AN---	V-XP---3R-AN---	VpXP---XR-AA---	VpXP---XR-AA---	0	1	1	1	1	1	1							0	0	0	1	1	1	1	1	1	1	1	1							1	1	1	1	0	0	1	1	1	1
zmluvy	SSfp4	NNFP4----------	NNFP4----------	NNFP1----------	NNFP4----------	NNFP4----------	NNFP4-----A----	NNFP4-----A----	0	1	1	1	1	1	1	1	1	1	1	1	1	1	1	1	1	1	1	1	1	1	1	1	1	1	0	1	1	1	1
na	Eu4	RR--4----------	RR--4-----------	RR--6-----------	RR--4-----------	RR--4-----------	RR--4----------	RR--4----------	0	1	1	1	1	1	1	1	1	1	1	1	1													1	0	1	1	1	1
a	O	J^-------------	J^-------------	J^-------------	J^-------------	J^-------------	J^-------------	J^-------------	0	1	1	1	1	1	1	1	1	1	1	1	1
sériu	SSfs4	NNFS4----------	NNFS4----------	NNFS4----------	NNFS4----------	NNFS4----------	NNFS4-----A----	NNFS4-----A----	0	1	1	1	1	1	1	1	1	1	1	1	1	1	1	1	1	1	1	1	1	1	1	1	1	1	1	1	1	1	1
úspešného	AAis2x	AAIS2----1-----	AAIS2----1-----	AAIS2----1-----	AAIS2----1-----	AAIS2----1-----	AAIS2----1A----	AAIS2----1A----	0	1	1	1	1	1	1	1	1	1	1	1	1	1	1	1	1	1	1	1	1	1	1	1	1	1	1	1	1	1	1
televízneho	AAis2x	AAIS2----1-----	AAIS2----1-----	AAIS2----1-----	AAIS2----1-----	AAIS2----1-----	AAIS2----1A----	AAIS2----1A----	0	1	1	1	1	1	1	1	1	1	1	1	1	1	1	1	1	1	1	1	1	1	1	1	1	1	1	1	1	1	1
seriálu	SSis2	NNIS2----------	NNIS2----------	NNIS2----------	NNIS2----------	NNIS2----------	NNIS2-----A----	NNIS2-----A----	0	1	1	1	1	1	1	1	1	1	1	1	1	1	1	1	1	1	1	1	1	1	1	1	1	1	1	1	1	1	1
Honoráre	SSip1	NNIP1----------	NNIP1----------	NNIP1----------	NNIP1----------	NNIP1----------	NNIP1-----A----	NNIP1-----A----	0	1	1	1	1	1	1	1	1	1	1	1	1	1	1	1	1	1	1	1	1	1	1	1	1	1	1	1	1	1	1
oboch	NNfp2	CxFP2----------	CxFP2----------	CxFP2----------	CxFP2----------	CxFP2----------	ClXP2----------	ClXP2----------	0	1	1	1	1	1	1	1	1	1	1	0	0	1	1	1	1	0	0	1	1	1	1	1	1	1	1	1	1	1	1
hviezd	SSfp2	NNFP2----------	NNFP2----------	NNFP2----------	NNFP2----------	NNFP2----------	NNFP2-----A----	NNFP2-----A----	0	1	1	1	1	1	1	1	1	1	1	1	1	1	1	1	1	1	1	1	1	1	1	1	1	1	1	1	1	1	1
vzrástli	VLdpci+	V-IP---3R-AN---	V-IP---3R-AN---	V-IP---3R-AN---	V-IP---3R-AN---	V-IP---3R-AN---	VpXP---XR-AA---	VpXP---XR-AA---	0	1	1	1	1	1	1							1	1	1	1	0	0	1	1	1	1	1	1							1	1	1	1	0	0	1	1	1	1
Jednu	NFfs4	CxFS4----------	CxFS4----------	CxFS4----------	CxFS4----------	CxFS4----------	ClFS4----------	ClFS4----------	0	1	1	1	1	1	1	1	1	1	1	0	0	1	1	1	1	1	1	1	1	1	1	1	1	1	1	1	1	1	1
z	Eu2	RR--2----------	RR--2-----------	RR--2-----------	RR--2-----------	RR--2-----------	RR--2----------	RR--2----------	0	1	1	1	1	1	1	1	1	1	1	1	1													1	1	1	1	1	1
epizód	SSfp2	NNFP2----------	NNFP2----------	NNFP2----------	NNFP2----------	NNFP2----------	NNFP2-----A----	NNFP2-----A----	0	1	1	1	1	1	1	1	1	1	1	1	1	1	1	1	1	1	1	1	1	1	1	1	1	1	1	1	1	1	1
napísal	VLdscm+	V-MS---3R-AN---	V-MS---3R-AN---	V-MS---3R-AN---	V-MS---3R-AN---	V-MS---3R-AN---	VpYS---XR-AA---	VpYS---XR-AA---	0	1	1	1	1	1	1							1	1	1	1	0	0	1	1	1	1	1	1							1	1	1	1	0	0	1	1	1	1
spoločne	Dx	Db-------1-----	Db-------1-----	Db-------1-----	Db-------1-----	Db-------1-----	Dg-------1A----	Dg-------1A----	0	1	1	1	1	1	1	1	1	1	1	0	0
s	Eu7	RR--7----------	RR--7-----------	RR--7-----------	RR--7-----------	RR--7-----------	RR--7----------	RR--7----------	0	1	1	1	1	1	1	1	1	1	1	1	1													1	1	1	1	1	1
Chrisom	SSms7:r	NNMS7----------	NNMS7----------	NNMS7----------	NNMS7----------	NNMS7----------	NNMS7-----A----	NNMS7-----A----	0	1	1	1	1	1	1	1	1	1	1	1	1	1	1	1	1	1	1	1	1	1	1	1	1	1	1	1	1	1	1
Carterom	SSms7:r	NNMS7----------	NNMS7----------	NNMS7----------	NNMS7----------	NNMS7----------	NNMS7-----A----	X@-------------	0	1	1	1	1	1	0	1	1	1	1	1	0	1	1	1	1	1		1	1	1	1	1		1	1	1	1	1
i	T	TT-------------	J^-------------	J^-------------	J^-------------	TT-------------	J^-------------	J^-------------	0	0	0	0	1	0	0	0	0	0	1	0	0
Stephen	SSms1:r	NNMS1----------	NNMS1----------	NNMS1----------	NNMS1----------	NNMS1----------	NNMS7-----A----	X@-------------	0	1	1	1	1	1	0	1	1	1	1	1	0	1	1	1	1	1		1	1	1	1	1		1	1	1	1	0
King	SSms1:r	NNMS1----------	NNMS1----------	NNMS1----------	NNMS1----------	NNMS1----------	NNMS7-----A----	X@-------------	0	1	1	1	1	1	0	1	1	1	1	1	0	1	1	1	1	1		1	1	1	1	1		1	1	1	1	0
UMA	SSfs1:r	NNFS1----------	NNFS1----------	NNFS1----------	NNFS1----------	NNFS1----------	NNFS1-----A----	X@-------------	0	1	1	1	1	1	0	1	1	1	1	1	0	1	1	1	1	1		1	1	1	1	1		1	1	1	1	1
A	T	TT-------------	TT-------------	J^-------------	J^-------------	TT-------------	J^-------------	J^-------------	0	1	0	0	1	0	0	1	0	0	1	0	0
ETHAN	SSms1:r	NNMS1----------	NNMS1----------	NNMS1----------	NNMS1----------	NNMS1----------	NNMP1-----A----	X@-------------	0	1	1	1	1	1	0	1	1	1	1	1	0	1	1	1	1	1		1	1	1	1	0		1	1	1	1	1
ČAKAJÚ	VKepc+	VB-P---3P-AA---	NNMS1----------	V--P---3P-AA---	V--P---3P-AA---	V--P---3P-AA---	VB-P---3P-AA---	VB-P---3P-AA---	0	0	1	1	1	1	1	0				1	1							0	1	1	1	1	1								1	1	1	1	1		1	1	1
Uma	SSfs1:r	NNFS1----------	NNFS1----------	NNFS1----------	NNFS1----------	NNFS1----------	NNFP7-----A----	X@-------------	0	1	1	1	1	1	0	1	1	1	1	1	0	1	1	1	1	1		1	1	1	1	0		1	1	1	1	0
Thurman	SUfs1:r	NxFS1----------	NNMS1----------	NxFS1----------	NNFS1----------	NxFS1----------	NNMS2-----A----	X@-------------	0	1	1	1	1	1	0	0	1	0	1	0	0	0	1	1	1	0		1	1	1	1	1		1	1	1	1	0
a	O	J^-------------	J^-------------	J^-------------	J^-------------	J^-------------	J^-------------	J^-------------	0	1	1	1	1	1	1	1	1	1	1	1	1
jej	PUms1	PZMS1----------	PZMS1----------	PZMS1----------	PZMS1----------	PZMS1----------	PSXXXFS3-------	PSXXXFS3-------	0	1	1	1	1	1	1	1	1	1	1	0	0	1	1	1	1	0	0	1	1	1	1	0	0	1	1	1	1	0	0
priateľ	SSms1	NNMS1----------	NNMS1----------	NNMS1----------	NNMS1----------	NNMS1----------	NNMS1-----A----	NNMS1-----A----	0	1	1	1	1	1	1	1	1	1	1	1	1	1	1	1	1	1	1	1	1	1	1	1	1	1	1	1	1	1	1
Ethan	SSms1:r	NNMS1----------	NNMS1----------	NNMS1----------	NNMS1----------	NNMS1----------	NNMS1-----A----	X@-------------	0	1	1	1	1	1	0	1	1	1	1	1	0	1	1	1	1	1		1	1	1	1	1		1	1	1	1	1
Hawke	SSms1:r	NNMS1----------	NxMS1----------	NNMS1----------	NNMS1----------	NNMS1----------	NNMS1-----A----	X@-------------	0	1	1	1	1	1	0	0	1	1	1	1	0	1	1	1	1	1		1	1	1	1	1		1	1	1	1	1
očakávajú	VKepc+	VB-P---3P-AA---	V--P---3P-AA---	V--P---3P-AA---	V--P---3P-AA---	V--P---3P-AA---	VB-P---3P-AA---	VB-P---3P-AA---	0	1	1	1	1	1	1					1	1							1	1	1	1	1	1							1	1	1	1	1	1	1	1	1	1
v	Eu6	RR--6----------	RR--6-----------	RR--6-----------	RR--6-----------	RR--6-----------	RR--6----------	RR--6----------	0	1	1	1	1	1	1	1	1	1	1	1	1													1	1	1	1	1	1
júni	SSis6	NNIS6----------	NNIS6----------	NNIS6----------	NNIS6----------	NNIS6----------	NNIS6-----A----	NNIS6-----A----	0	1	1	1	1	1	1	1	1	1	1	1	1	1	1	1	1	1	1	1	1	1	1	1	1	1	1	1	1	1	1
narodenie	SSns4	NNNS4----------	NNNS4----------	NNNS4----------	NNNS4----------	NNNS4----------	NNNS4-----A----	NNNS4-----A----	0	1	1	1	1	1	1	1	1	1	1	1	1	1	1	1	1	1	1	1	1	1	1	1	1	1	1	1	1	1	1
dieťaťa	SSns2	NNNS2----------	NNNS2----------	NNNS2----------	NNNS2----------	NNNS2----------	NNNS2-----A----	NNNS2-----A----	0	1	1	1	1	1	1	1	1	1	1	1	1	1	1	1	1	1	1	1	1	1	1	1	1	1	1	1	1	1	1
Uma	SSfs1:r	NNFS1----------	NNFS1----------	NNFS1----------	NNFS1----------	NNFS1----------	NNFP7-----A----	X@-------------	0	1	1	1	1	1	0	1	1	1	1	1	0	1	1	1	1	1		1	1	1	1	0		1	1	1	1	0
sa	R	NNFS1----------	NNFS1----------	NNFS1----------	NNFS1----------	NNFS1----------	P7-X4----------	P7-X4----------	0	1	1	1	1	0	0	1	1	1	1	0	0	1	1	1	1			1	1	1	1	0	0	1	1	1	1	0	0
v	Eu6	RR--6----------	RR--6-----------	RR--6-----------	RR--6-----------	RR--6-----------	RR--6----------	RR--6----------	0	1	1	1	1	1	1	1	1	1	1	1	1													1	1	1	1	1	1
roku	SSis6	NNIS6----------	NNIS6----------	NNIS6----------	NNIS6----------	NNIS6----------	NNIS6-----A----	NNIS6-----A----	0	1	1	1	1	1	1	1	1	1	1	1	1	1	1	1	1	1	1	1	1	1	1	1	1	1	1	1	1	1	1
rozviedla	VLdscf+	V-FS---3R-AN---	V-FS---3R-AN---	V-FS---3R-AN---	V-FS---3R-AN---	V-FS---3R-AN---	VpFS---XR-AA---	VpFS---XR-AA---	0	1	1	1	1	1	1							1	1	1	1	1	1	1	1	1	1	1	1							1	1	1	1	0	0	1	1	1	1
po	Eu6	RR--6----------	RR--6-----------	RR--6-----------	RR--6-----------	RR--6-----------	RR--6----------	RR--6----------	0	1	1	1	1	1	1	1	1	1	1	1	1													1	1	1	1	1	1
dvoch	NNip6	CxIP6----------	CxIP6----------	CxIP6----------	CxIP6----------	CxIP6----------	ClXP6----------	ClXP6----------	0	1	1	1	1	1	1	1	1	1	1	0	0	1	1	1	1	0	0	1	1	1	1	1	1	1	1	1	1	1	1
rokoch	SSip6	NNIP6----------	NNIP6----------	NNIP6----------	NNIP6----------	NNIP6----------	NNIP6-----A----	NNIP6-----A----	0	1	1	1	1	1	1	1	1	1	1	1	1	1	1	1	1	1	1	1	1	1	1	1	1	1	1	1	1	1	1
manželstva	SSns2	NNNS2----------	NNNS2----------	NNNS2----------	NNNS2----------	NNNS2----------	NNNS2-----A----	NNNS2-----A----	0	1	1	1	1	1	1	1	1	1	1	1	1	1	1	1	1	1	1	1	1	1	1	1	1	1	1	1	1	1	1
s	Eu7	RR--7----------	RR--7-----------	RR--7-----------	RR--7-----------	RR--7-----------	RR--7----------	RR--7----------	0	1	1	1	1	1	1	1	1	1	1	1	1													1	1	1	1	1	1
Gary	SFms7:r	NxMS7----------	NxMS7----------	NxMS7----------	NNMS7----------	NNMS7----------	NNMXX-----A----	X@-------------	0	1	1	1	1	1	0	1	1	0	0	0	0	1	1	1	1	1		1	1	1	1	0		1	1	1	1	0
Oldmanom	SSms7:r	NNMS7----------	NNMS7----------	NNMS7----------	NNMS7----------	NNMS7----------	NNMS7-----A----	X@-------------	0	1	1	1	1	1	0	1	1	1	1	1	0	1	1	1	1	1		1	1	1	1	1		1	1	1	1	1
A	T	TT-------------	TT-------------	J^-------------	J^-------------	TT-------------	J^-------------	J^-------------	0	1	0	0	1	0	0	1	0	0	1	0	0
buďte	VMepb+	V--P---2--AA---	V--P---2--AA---	V--P---2--AA---	V--P---2--AA---	V--P---2--AA---	Vi-P---2--A----	Vi-P---2--A----	0	1	1	1	1	1	1													1	1	1	1	1	1							1	1	1	1	1	1
veľmi	Dx	Db-------1-----	Db-------1-----	Db-------1-----	Db-------1-----	Db-------1-----	Db-------------	Db-------------	0	1	1	1	1	1	1	1	1	1	1	1	1
hladní	AAmp1x	AAMP1----1-----	AAMP1----1-----	AAMP1----1-----	AAMP1----1-----	AAMP1----1-----	AAMP1----1A----	AAMP1----1A----	0	1	1	1	1	1	1	1	1	1	1	1	1	1	1	1	1	1	1	1	1	1	1	1	1	1	1	1	1	1	1
Jazz	SSis1	NNIS1----------	NNIS1----------	NNIS1----------	Z:------------	NNIS1----------	NNIS1-----A----	NNIS1-----A----	0	1	1	0	1	1	1	1	1	0	1	1	1	1	1		1	1	1	1	1		1	1	1	1	1		1	1	1
blues	SUns1	NxNS1----------	NxNS1----------	NxNS1----------	Z:------------	NNIS1----------	NNNXX-----A----	NNNXX-----A----	0	1	1	0	1	1	1	1	1	0	0	0	0	1	1		0	1	1	1	1		1	0	0	1	1		1	0	0
rock	SSis1	NNIS1----------	NNIS1----------	NNIS1----------	Z:------------	NNIS1----------	XX-------------	XX-------------	0	1	1	0	1	0	0	1	1	0	1	0	0	1	1		1			1	1		1			1	1		1
funk	SSis1	NNIS1----------	NNIS1----------	NNIS1----------	NNIS1----------	NNIS1----------	NNMXX-----A---8	X@-------------	0	1	1	1	1	1	0	1	1	1	1	1	0	1	1	1	1	0		1	1	1	1	0		1	1	1	1	0
V	Eu4	RR--4----------	RR--4-----------	RR--4-----------	RR--4-----------	RR--4-----------	RR--4----------	RR--4----------	0	1	1	1	1	1	1	1	1	1	1	1	1													1	1	1	1	1	1
takýto	PAis4	P4IS4----------	P4IS4----------	P4IS4----------	P4IS4----------	P4IS4----------	PDIS4----------	PDIS4----------	0	1	1	1	1	1	1	1	1	1	1	0	0	1	1	1	1	1	1	1	1	1	1	1	1	1	1	1	1	1	1
večer	SSis4	NNIS4----------	NNIS4----------	NNIS4----------	NNIS4----------	NNIS4----------	NNIS4-----A----	NNIS4-----A----	0	1	1	1	1	1	1	1	1	1	1	1	1	1	1	1	1	1	1	1	1	1	1	1	1	1	1	1	1	1	1
však	T	TT-------------	TT-------------	TT-------------	TT-------------	TT-------------	J^-------------	J^-------------	0	1	1	1	1	0	0	1	1	1	1	0	0
treba	Dx	Db-------1-----	Db-------1-----	Db-------1-----	Db-------1-----	Db-------1-----	Dg-------1A----	Dg-------1A----	0	1	1	1	1	1	1	1	1	1	1	0	0
prísť	VId+	Vf--------AN---	Vf--------AN---	Vf--------AN---	Vf--------AN---	Vf--------AN---	Vf--------A----	Vf--------A----	0	1	1	1	1	1	1	1	1	1	1	1	1
skôr	Dx	Db-------1-----	Db-------1-----	Db-------1-----	Db-------1-----	Db-------1-----	Dg-------2A----	Dg-------2A----	0	1	1	1	1	1	1	1	1	1	1	0	0
a	O	J^-------------	J^-------------	J^-------------	J^-------------	J^-------------	J^-------------	J^-------------	0	1	1	1	1	1	1	1	1	1	1	1	1
obsadiť	VId+	Vf--------AN---	Vf--------AN---	Vf--------AN---	Vf--------AN---	Vf--------AN---	Vf--------A----	Vf--------A----	0	1	1	1	1	1	1	1	1	1	1	1	1
si	R	Vf--------AN---	Vf--------AN---	Vf--------AN---	Vf--------AN---	Vf--------AN---	P7-X3----------	P7-X3----------	0	1	1	1	1	0	0	1	1	1	1	0	0
stôl	SSis4	NNIS4----------	NNIS4----------	NNIS4----------	NNIS4----------	NNIS4----------	NNIS4-----A----	NNIS4-----A----	0	1	1	1	1	1	1	1	1	1	1	1	1	1	1	1	1	1	1	1	1	1	1	1	1	1	1	1	1	1	1
Našťastie	T	TT-------------	TT-------------	TT-------------	TT-------------	TT-------------	TT--------------	TT--------------	0	1	1	1	1	1	1	1	1	1	1	1	1
sa	R	TT-------------	TT-------------	TT-------------	TT-------------	TT-------------	P7-X4----------	P7-X4----------	0	1	1	1	1	0	0	1	1	1	1	0	0
nemusím	VKesa-	VB-S---1P-NA---	V--S---1P-NA---	V--S---1P-NA---	V--S---1P-NA---	V--S---1P-NA---	VB-S---1P-NA---	VB-S---1P-NA---	0	1	1	1	1	1	1					1	1							1	1	1	1	1	1							1	1	1	1	1	1	1	1	1	1
veľmi	Dx	Db-------1-----	Db-------1-----	Db-------1-----	Db-------1-----	Db-------1-----	Db-------------	Db-------------	0	1	1	1	1	1	1	1	1	1	1	1	1
rozpisovať	VIe+	Vf--------AA---	Vf--------AA---	Vf--------AA---	Vf--------AA---	Vf--------AA---	Vf--------A----	Vf--------A----	0	1	1	1	1	1	1	1	1	1	1	1	1
lebo	O	J^-------------	J^-------------	J^-------------	J^-------------	J^-------------	J,-------------	J,-------------	0	1	1	1	1	1	1	1	1	1	1	0	0
Hysteria	SSfs1:r	NNFS1----------	NNFS1----------	NNFS1----------	NNFS1----------	NNFS1----------	NNFS1-----A----	X@-------------	0	1	1	1	1	1	0	1	1	1	1	1	0	1	1	1	1	1		1	1	1	1	1		1	1	1	1	1
Pub	SSis1:r	NNIS1----------	NNIS1----------	NNIS1----------	NNIS1----------	NNIS1----------	NNIS2-----A----	X@-------------	0	1	1	1	1	1	0	1	1	1	1	1	0	1	1	1	1	1		1	1	1	1	1		1	1	1	1	0
má	VKesc+	VB-S---3P-AA---	V--S---3P-AA---	V--S---3P-AA---	V--S---3P-AA---	V--S---3P-AA---	VB-S---3P-AA---	VB-S---3P-AA---	0	1	1	1	1	1	1					1	1							1	1	1	1	1	1							1	1	1	1	1	1	1	1	1	1
svoju	PFfs4	PDFS4----------	PDFS4----------	PDFS4----------	PDFS4----------	PDFS4----------	P8FS4----------	P8FS4----------	0	1	1	1	1	1	1	1	1	1	1	0	0	1	1	1	1	1	1	1	1	1	1	1	1	1	1	1	1	1	1
webovú	AAfs4x	AAFS4----1-----	AAFS4----1-----	AAFS4----1-----	AAFS4----1-----	AAFS4----1-----	AAFS4----1A----	AAFS4----1A----	0	1	1	1	1	1	1	1	1	1	1	1	1	1	1	1	1	1	1	1	1	1	1	1	1	1	1	1	1	1	1
stránku	SSfs4	NNFS4----------	NNFS4----------	NNFS4----------	NNFS4----------	NNFS4----------	NNFS4-----A----	NNFS4-----A----	0	1	1	1	1	1	1	1	1	1	1	1	1	1	1	1	1	1	1	1	1	1	1	1	1	1	1	1	1	1	1
Na	Eu4	RR--4----------	RR--4-----------	RR--4-----------	RR--4-----------	RR--4-----------	RR--4----------	RR--4----------	0	1	1	1	1	1	1	1	1	1	1	1	1													1	1	1	1	1	1
pitie	SSns4	NNNS4----------	NNNS4----------	NNNS4----------	NNNS4----------	NNNS4----------	NNNS4-----A----	NNNS4-----A----	0	1	1	1	1	1	1	1	1	1	1	1	1	1	1	1	1	1	1	1	1	1	1	1	1	1	1	1	1	1	1
tu	PD	PY-------------	PY-------------	PY-------------	PY-------------	PY-------------	Db-------------	Db-------------	0	1	1	1	1	0	0	1	1	1	1	0	0
dostanete	VKdpb+	VB-P---2P-AN---	V--P---2P-AN---	V--P---2P-AN---	V--P---2P-AN---	V--P---2P-AN---	VB-P---2P-AA---	VB-P---2P-AA---	0	1	1	1	1	1	1					1	1							1	1	1	1	1	1							1	1	1	1	1	1	1	1	1	1
všetky	PFnp4	PDNP4----------	PDNP4----------	PDNP4----------	PDNP4----------	PDNP4----------	PLFP4----------	PLFP4----------	0	1	1	1	1	1	1	1	1	1	1	0	0	1	1	1	1	0	0	1	1	1	1	1	1	1	1	1	1	1	1
bežné	AAnp4x	AANP4----1-----	AANP4----1-----	AANP4----1-----	AANP4----1-----	AANP4----1-----	AAFP4----1A----	AAFP4----1A----	0	1	1	1	1	1	1	1	1	1	1	1	1	1	1	1	1	0	0	1	1	1	1	1	1	1	1	1	1	1	1
alká	SSnp4	NNNP4----------	NNNP4----------	NNNP4----------	NNNP4----------	NNNP4----------	NNFS4-----A----	X@-------------	0	1	1	1	1	1	0	1	1	1	1	1	0	1	1	1	1	0		1	1	1	1	0		1	1	1	1	1
a	O	J^-------------	J^-------------	J^-------------	J^-------------	J^-------------	J^-------------	J^-------------	0	1	1	1	1	1	1	1	1	1	1	1	1
nealká	SSnp4	NNNP4----------	NNNP4----------	NNNP4----------	NNNP4----------	NNNP4----------	NNFS4-----A----	X@-------------	0	1	1	1	1	1	0	1	1	1	1	1	0	1	1	1	1	0		1	1	1	1	0		1	1	1	1	1
Tie	PFip1	PDIP1----------	PDIP1----------	PDIP1----------	PDIP1----------	PDIP1----------	PDIP1----------	PDIP1----------	0	1	1	1	1	1	1	1	1	1	1	1	1	1	1	1	1	1	1	1	1	1	1	1	1	1	1	1	1	1	1
sú	VKepc+	VB-P---3P-AA---	V--P---3P-AA---	V--P---3P-AA---	V--P---3P-AA---	V--P---3P-AA---	VB-P---3P-AA---	VB-P---3P-AA---	0	1	1	1	1	1	1					1	1							1	1	1	1	1	1							1	1	1	1	1	1	1	1	1	1
naozaj	T	TT-------------	TT-------------	TT-------------	TT-------------	TT-------------	TT--------------	TT--------------	0	1	1	1	1	1	1	1	1	1	1	1	1
vynikajúce	Gtip1x	TT-------------	TT-------------	TT-------------	TT-------------	TT-------------	AGFP1-----A----	AGFP1-----A----	0	1	1	1	1	0	0	1	1	1	1	0	0
Restaurant	%	TT-------------	TT-------------	Z:-------------	Z:------------	TT-------------	NNIS1-----A----	X@-------------	0	1	0	0	1	0	0	1	0	0	1	0	0
Dynamo	SSns1:r	NNNS1----------	NNNS1----------	NNNS1----------	Z:------------	NNNS1----------	NNNS1-----A----	NNNS1-----A----	0	1	1	0	1	1	1	1	1	0	1	1	1	1	1		1	1	1	1	1		1	1	1	1	1		1	1	1
Pštrossova	%	NNNS1----------	NNNS1----------	NNNS1----------	Z:------------	NNNS1----------	NNFS1-----A----	X@-------------	0	1	1	0	1	1	0	1	1	0	1	1	0	1	1		1	0		1	1		1	1		1	1		1	1
Praha	SSfs1:r	NNFS1----------	NNFS1----------	NNFS1----------	Z:------------	NNFS1----------	NNFS1-----A----	NNFS1-----A----	0	1	1	0	1	1	1	1	1	0	1	1	1	1	1		1	1	1	1	1		1	1	1	1	1		1	1	1
telefón	SSis1	NNIS1----------	NNIS1----------	NNIS1----------	NNIS1----------	NNIS1----------	NNIS1-----A----	NNIS1-----A----	0	1	1	1	1	1	1	1	1	1	1	1	1	1	1	1	1	1	1	1	1	1	1	1	1	1	1	1	1	1	1
Kto	PFms1	PDMS1----------	PDMS1----------	PDMS1----------	PDMS1----------	PDMS1----------	PKM-1----------	PKM-1----------	0	1	1	1	1	1	1	1	1	1	1	0	0	1	1	1	1	1	1	1	1	1	1			1	1	1	1	1	1
zažil	VLdscm+	V-MS---3R-AN---	V-MS---3R-AN---	V-MS---3R-AN---	V-MS---3R-AN---	V-MS---3R-AN---	VpYS---XR-AA---	VpYS---XR-AA---	0	1	1	1	1	1	1							1	1	1	1	0	0	1	1	1	1	1	1							1	1	1	1	0	0	1	1	1	1
sparné	AAns4x	AANS4----1-----	AANS4----1-----	AANS4----1-----	AANS4----1-----	AANS4----1-----	AANS4----1A----	AANS4----1A----	0	1	1	1	1	1	1	1	1	1	1	1	1	1	1	1	1	1	1	1	1	1	1	1	1	1	1	1	1	1	1
pražské	AAns4x	AANS4----1-----	AANS4----1-----	AANS4----1-----	AANS4----1-----	AANS4----1-----	AANS4----1A----	AANS4----1A----	0	1	1	1	1	1	1	1	1	1	1	1	1	1	1	1	1	1	1	1	1	1	1	1	1	1	1	1	1	1	1
popoludnie	SSns4	NNNS4----------	NNNS4----------	NNNS4----------	NNNS4----------	NNNS4----------	NNNS4-----A----	NNNS4-----A----	0	1	1	1	1	1	1	1	1	1	1	1	1	1	1	1	1	1	1	1	1	1	1	1	1	1	1	1	1	1	1
vie	VKesc+	VB-S---3P-AA---	V--S---3P-AA---	V--S---3P-AA---	V--S---3P-AA---	V--S---3P-AA---	VB-S---3P-AA---	VB-S---3P-AA---	0	1	1	1	1	1	1					1	1							1	1	1	1	1	1							1	1	1	1	1	1	1	1	1	1
veľmi	Dx	Db-------1-----	Db-------1-----	Db-------1-----	Db-------1-----	Db-------1-----	Db-------------	Db-------------	0	1	1	1	1	1	1	1	1	1	1	1	1
dobre	Dx	Db-------1-----	Db-------1-----	Db-------1-----	Db-------1-----	Db-------1-----	Dg-------1A----	Dg-------1A----	0	1	1	1	1	1	1	1	1	1	1	0	0
čo	PFns4	PDNS4----------	PDNS4----------	PDNS1----------	PDNS4----------	PDNS4----------	PQ--1----------	PQ--1----------	0	1	1	1	1	1	1	1	1	1	1	0	0	1	1	1	1			1	1	1	1			1	0	1	1	0	0
znamená	VKesc+	VB-S---3P-AA---	V--S---3P-AA---	V--S---3P-AA---	V--S---3P-AA---	V--S---3P-AA---	VB-S---3P-AA---	VB-S---3P-AA---	0	1	1	1	1	1	1					1	1							1	1	1	1	1	1							1	1	1	1	1	1	1	1	1	1
spojenie	SSns1	NNNS1----------	NNNS1----------	NNNS1----------	NNNS1----------	NNNS1----------	NNNS4-----A----	NNNS4-----A----	0	1	1	1	1	1	1	1	1	1	1	1	1	1	1	1	1	1	1	1	1	1	1	1	1	1	1	1	1	0	0
správně	%	NNNS1----------	NNNS1----------	NNNS1----------	Z:------------	Db-------1-----	Dg-------1A----	X@-------------	0	1	1	0	0	0	0	1	1	0	0	0	0	1	1					1	1					1	1
vychlazená	%	NNNS1----------	NNNS1----------	NNNS1----------	Z:------------	Db-------1-----	AAFS2----1A----	X@-------------	0	1	1	0	0	0	0	1	1	0	0	0	0	1	1			0		1	1			1		1	1			0
dvanáctka	%	NNNS1----------	NNFS1----------	NNNS1----------	Z:------------	AAFS1----1-----	NNFS2-----A----	X@-------------	0	1	1	0	0	1	0	1	1	0	0	1	0	0	1		0	0		1	1		1	1		1	1		1	0
Celý	AAis1x	AAIS1----1-----	AAIS1----1-----	AAIS4----1-----	AAIS1----1-----	AAIS1----1-----	AAIS4----1A----	AAIS4----1A----	0	1	1	1	1	1	1	1	1	1	1	1	1	1	1	1	1	1	1	1	1	1	1	1	1	1	0	1	1	0	0
dojem	SSis1	NNIS1----------	NNIS1----------	NNIS4----------	NNIS1----------	NNIS1----------	NNIS4-----A----	NNIS4-----A----	0	1	1	1	1	1	1	1	1	1	1	1	1	1	1	1	1	1	1	1	1	1	1	1	1	1	0	1	1	0	0
nie	T	TT-------------	TT-------------	TT-------------	TT-------------	TT-------------	TT--------------	TT--------------	0	1	1	1	1	1	1	1	1	1	1	1	1
je	VKesc-	VB-S---3P-NA---	V--S---3P-AA---	V--S---3P-AA---	V--S---3P-NA---	V--S---3P-NA---	VB-S---3P-AA---	VB-S---3P-AA---	0	1	1	1	1	1	1					1	1							1	1	1	1	1	1							1	1	1	1	1	1	1	1	1	1
nijako	PD	PY-------------	PY-------------	PY-------------	PY-------------	PY-------------	Db-------------	Db-------------	0	1	1	1	1	0	0	1	1	1	1	0	0
uchvacujúci	Gkis1x	PY-------------	PY-------------	PY-------------	PY-------------	PY-------------	AGIS1-----A----	AGIS1-----A----	0	1	1	1	1	0	0	1	1	1	1	0	0
až	T	TT-------------	TT-------------	TT-------------	TT-------------	TT-------------	TT--------------	TT--------------	0	1	1	1	1	1	1	1	1	1	1	1	1
do	Eu2	RR--2----------	RR--2-----------	RR--2-----------	RR--2-----------	RR--2-----------	RR--2----------	RR--2----------	0	1	1	1	1	1	1	1	1	1	1	1	1													1	1	1	1	1	1
chvíle	SSfs2	NNFS2----------	NNFS2----------	NNFS2----------	NNFS2----------	NNFS2----------	NNFS2-----A----	NNFS2-----A----	0	1	1	1	1	1	1	1	1	1	1	1	1	1	1	1	1	1	1	1	1	1	1	1	1	1	1	1	1	1	1
keď	O	J^-------------	J^-------------	J^-------------	J^-------------	J^-------------	J,-------------	J,-------------	0	1	1	1	1	1	1	1	1	1	1	0	0
požiadate	VKdpb+	VB-P---2P-AN---	V--P---2P-AN---	V--P---2P-AN---	V--P---2P-AN---	V--P---2P-AN---	VB-P---2P-AA---	VB-P---2P-AA---	0	1	1	1	1	1	1					1	1							1	1	1	1	1	1							1	1	1	1	1	1	1	1	1	1
o	Eu4	RR--4----------	RR--4-----------	RR--4-----------	RR--4-----------	RR--4-----------	RR--4----------	RR--4----------	0	1	1	1	1	1	1	1	1	1	1	1	1													1	1	1	1	1	1
jedálny	AAis4x	AAIS4----1-----	AAIS4----1-----	AAIS4----1-----	AAIS4----1-----	AAIS4----1-----	AAIS4----1A----	AAIS4----1A----	0	1	1	1	1	1	1	1	1	1	1	1	1	1	1	1	1	1	1	1	1	1	1	1	1	1	1	1	1	1	1
lístok	SSis4	NNIS4----------	NNIS4----------	NNIS4----------	NNIS4----------	NNIS4----------	NNIS4-----A----	NNIS4-----A----	0	1	1	1	1	1	1	1	1	1	1	1	1	1	1	1	1	1	1	1	1	1	1	1	1	1	1	1	1	1	1
Jedlo	SSns1	NNNS1----------	NNNS1----------	NNNS1----------	NNNS1----------	NNNS1----------	NNNS1-----A----	NNNS1-----A----	0	1	1	1	1	1	1	1	1	1	1	1	1	1	1	1	1	1	1	1	1	1	1	1	1	1	1	1	1	1	1
je	VKesc+	VB-S---3P-AA---	V--S---3P-AA---	V--S---3P-AA---	V--S---3P-AA---	V--S---3P-AA---	VB-S---3P-AA---	VB-S---3P-AA---	0	1	1	1	1	1	1					1	1							1	1	1	1	1	1							1	1	1	1	1	1	1	1	1	1
na	Eu6	RR--6----------	RR--6-----------	RR--6-----------	RR--6-----------	RR--6-----------	RR--6----------	RR--6----------	0	1	1	1	1	1	1	1	1	1	1	1	1													1	1	1	1	1	1
stole	SSis6	NNIS6----------	NNIS6----------	NNIS6----------	NNIS6----------	NNIS6----------	NNIS6-----A----	NNIS6-----A----	0	1	1	1	1	1	1	1	1	1	1	1	1	1	1	1	1	1	1	1	1	1	1	1	1	1	1	1	1	1	1
za	Eu4	RR--4----------	RR--4-----------	RR--4-----------	RR--4-----------	RR--4-----------	RR--4----------	RR--4----------	0	1	1	1	1	1	1	1	1	1	1	1	1													1	1	1	1	1	1
necelú	AAfs4x	AAFS4----1-----	AAFS4----1-----	AAFS4----1-----	AAFS4----1-----	AAFS4----1-----	AAFS4----1N----	AAFS4----1N----	0	1	1	1	1	1	1	1	1	1	1	1	1	1	1	1	1	1	1	1	1	1	1	1	1	1	1	1	1	1	1
polhodinu	SSfs4	NNFS4----------	NNFS4----------	NNFS4----------	NNFS4----------	NNFS4----------	NNFS4-----A----	NNFS4-----A----	0	1	1	1	1	1	1	1	1	1	1	1	1	1	1	1	1	1	1	1	1	1	1	1	1	1	1	1	1	1	1
Mäso	SSns1	NNNS1----------	NNNS1----------	NNNS1----------	NNNS1----------	NNNS1----------	NNNS1-----A----	NNNS1-----A----	0	1	1	1	1	1	1	1	1	1	1	1	1	1	1	1	1	1	1	1	1	1	1	1	1	1	1	1	1	1	1
je	VKesc+	VB-S---3P-AA---	V--S---3P-AA---	V--S---3P-AA---	V--S---3P-AA---	V--S---3P-AA---	VB-S---3P-AA---	VB-S---3P-AA---	0	1	1	1	1	1	1					1	1							1	1	1	1	1	1							1	1	1	1	1	1	1	1	1	1
neuveriteľne	Dx	Db-------1-----	Db-------1-----	Db-------1-----	Db-------1-----	Db-------1-----	Dg-------1N----	Dg-------1N----	0	1	1	1	1	1	1	1	1	1	1	0	0
vynikajúco	Dx	Db-------1-----	Db-------1-----	Db-------1-----	Db-------1-----	Db-------1-----	Dg-------1A----	Dg-------1A----	0	1	1	1	1	1	1	1	1	1	1	0	0
ochutené	Gtns1x	Db-------1-----	Db-------1-----	Db-------1-----	Db-------1-----	Db-------1-----	AANS1----1A----	AANS1----1A----	0	1	1	1	1	0	0	1	1	1	1	0	0
mäkké	AAns1x	AANS1----1-----	AANS1----1-----	AAIP1----1-----	AANS1----1-----	AANS1----1-----	AANS1----1A----	AANS1----1A----	0	1	1	1	1	1	1	1	1	1	1	1	1	1	0	1	1	1	1	1	0	1	1	1	1	1	1	1	1	1	1
obloha	SSfs1	NNFS1----------	NNFS1----------	NNFS1----------	NNFS1----------	NNFS1----------	NNFS1-----A----	NNFS1-----A----	0	1	1	1	1	1	1	1	1	1	1	1	1	1	1	1	1	1	1	1	1	1	1	1	1	1	1	1	1	1	1
čerstvá	AAfs1x	AAFS1----1-----	AAFS1----1-----	AAFS1----1-----	AAFS1----1-----	AAFS1----1-----	AAFS1----1A----	AAFS1----1A----	0	1	1	1	1	1	1	1	1	1	1	1	1	1	1	1	1	1	1	1	1	1	1	1	1	1	1	1	1	1	1
hranolky	SSfp1	NNFP1----------	NNFP1----------	NNFP1----------	NNFP1----------	NNFP1----------	X@-------------	X@-------------	0	1	1	1	1	0	0	1	1	1	1	0	0	1	1	1	1			1	1	1	1			1	1	1	1
křupavé	%	NNFP1----------	NNFP1----------	NNFP1----------	NNFS1----------	AANS1----1-----	AAXXX----1A----	X@-------------	0	1	1	1	0	0	0	1	1	1	0	0	0	1	1	1	0	0		1	1	0	0	0		1	1	1	1	0
Odfukujeme	VKepa+	VB-P---1P-AA---	V--P---1P-AA---	V--P---1P-AA---	V--P---1P-AA---	V--P---1P-AA---	VB-P---1P-AA---	VB-P---1P-AA---	0	1	1	1	1	1	1					1	1							1	1	1	1	1	1							1	1	1	1	1	1	1	1	1	1
v	Eu6	RR--6----------	RR--6-----------	RR--6-----------	RR--6-----------	RR--6-----------	RR--6----------	RR--6----------	0	1	1	1	1	1	1	1	1	1	1	1	1													1	1	1	1	1	1
spoločnosti	SSfs6	NNFS6----------	NNFS6----------	NNFS6----------	NNFS6----------	NNFS6----------	NNFS6-----A----	NNFS6-----A----	0	1	1	1	1	1	1	1	1	1	1	1	1	1	1	1	1	1	1	1	1	1	1	1	1	1	1	1	1	1	1
braníckej	AAfs2x	AAFS2----1-----	AAFS2----1-----	AAFS2----1-----	AAFS2----1-----	AAFS2----1-----	AGFS6-----A----	X@-------------	0	1	1	1	1	1	0	1	1	1	1	0	0	1	1	1	1	1		1	1	1	1	1		1	1	1	1	0
desiatky	SSfs2	NNFS2----------	NNFS2----------	NNFS2----------	NNFS2----------	NNFS2----------	NNFP4-----A----	NNFP4-----A----	0	1	1	1	1	1	1	1	1	1	1	1	1	1	1	1	1	1	1	1	1	1	1	0	0	1	1	1	1	0	0
Po	Eu6	RR--6----------	RR--6-----------	RR--6-----------	RR--6-----------	RR--6-----------	RR--6----------	RR--6----------	0	1	1	1	1	1	1	1	1	1	1	1	1													1	1	1	1	1	1
chvíli	SSfs6	NNFS6----------	NNFS6----------	NNFS6----------	NNFS6----------	NNFS6----------	NNFS6-----A----	NNFS6-----A----	0	1	1	1	1	1	1	1	1	1	1	1	1	1	1	1	1	1	1	1	1	1	1	1	1	1	1	1	1	1	1
štartujeme	VKjpa+	VB-P---1P-A----	V--P---1P-A----	V--P---1P-A----	V--P---1P-AA---	V--P---1P-AA---	VB-P---1P-AA---	VB-P---1P-AA---	0	1	1	1	1	1	1					1	1							1	1	1	1	1	1							1	1	1	1	1	1	1	1	1	1
automat	SSis4	NNIS4----------	NNIS4----------	NNIS4----------	NNIS4----------	NNIS4----------	NNIS4-----A----	NNIS4-----A----	0	1	1	1	1	1	1	1	1	1	1	1	1	1	1	1	1	1	1	1	1	1	1	1	1	1	1	1	1	1	1
elektronických	AAfp2x	AAFP2----1-----	AAFP2----1-----	AAFP2----1-----	AAFP2----1-----	AAFP2----1-----	AAFP2----1A----	AAFP2----1A----	0	1	1	1	1	1	1	1	1	1	1	1	1	1	1	1	1	1	1	1	1	1	1	1	1	1	1	1	1	1	1
šípok	SSfp2	NNFP2----------	NNFP2----------	NNFP2----------	NNFP2----------	NNFP2----------	NNFP2-----A----	NNFP2-----A----	0	1	1	1	1	1	1	1	1	1	1	1	1	1	1	1	1	1	1	1	1	1	1	1	1	1	1	1	1	1	1
Záverečná	SAfs1	NxFS1----------	AAFS1----1-----	AAFS1----1-----	NxFS1----------	NxFS1----------	AAFS1----1A----	AAFS1----1A----	0	0	0	1	1	0	0	0	0	1	1	0	0	1	1	1	1	1	1	1	1	1	1	1	1	1	1	1	1	1	1
S	Eu7	RR--7----------	RR--7-----------	RR--7-----------	RR--7-----------	RR--7-----------	RR--7----------	RR--7----------	0	1	1	1	1	1	1	1	1	1	1	1	1													1	1	1	1	1	1
údivom	SSis7	NNIS7----------	NNIS7----------	NNIS7----------	NNIS7----------	NNIS7----------	NNIS7-----A----	NNIS7-----A----	0	1	1	1	1	1	1	1	1	1	1	1	1	1	1	1	1	1	1	1	1	1	1	1	1	1	1	1	1	1	1
pozeráme	VKepa+	VB-P---1P-AA---	V--P---1P-AA---	V--P---1P-AA---	V--P---1P-AA---	V--P---1P-AA---	VB-P---1P-AA---	VB-P---1P-AA---	0	1	1	1	1	1	1					1	1							1	1	1	1	1	1							1	1	1	1	1	1	1	1	1	1
na	Eu4	RR--4----------	RR--4-----------	RR--4-----------	RR--4-----------	RR--4-----------	RR--4----------	RR--4----------	0	1	1	1	1	1	1	1	1	1	1	1	1													1	1	1	1	1	1
hospodskú	%	RR--4----------	RR--4-----------	RR--4-----------	NNFS4----------	RR--4-----------	AAFS4----1A----	X@-------------	0	1	1	0	1	0	0	1	1	0	1	0	0													1	1	1	1	1
Včera	%	RR--4----------	Db-------1-----	Z:-------------	Z:------------	RR--4-----------	Db-------------	Db-------------	0	0	0	0	1	0	0	0	0	0	1	0	0																1
byl	%	RR--4----------	V-MS---3R-AA---	Z:-------------	Z:------------	RR--4-----------	VpYS---XR-AA---	X@-------------	0	0	0	0	1	0	0		0	0	1	0	0																1
tady	%	RR--4----------	PY-------------	Z:-------------	Z:------------	RR--4-----------	Db-------------	X@-------------	0	0	0	0	1	0	0	0	0	0	1	0	0																1
zas	%	RR--4----------	Db-------1-----	Z:-------------	Z:------------	RR--4-----------	Db-------------	Db-------------	0	0	0	0	1	0	0	0	0	0	1	0	0																1
a	%	RR--4----------	J^-------------	Z:-------------	Z:------------	J^-------------	J^-------------	J^-------------	0	0	0	0	0	0	0	0	0	0	0	0	0
dělal	%	RR--4----------	V-MS---3R-AA---	Z:-------------	Z:------------	J^-------------	VpYS---XR-AA---	X@-------------	0	0	0	0	0	0	0		0	0	0	0	0
problémy	%	RR--4----------	NNIP4----------	Z:-------------	Z:------------	J^-------------	NNIP4-----A----	NNIP4-----A----	0	0	0	0	0	0	0	0	0	0	0	0	0													1				1	1
dodáva	VKesc+	VB-S---3P-AA---	V--S---3P-AA---	V--S---3P-AA---	V--S---3P-AA---	V--S---3P-AA---	VB-S---3P-AA---	VB-S---3P-AA---	0	1	1	1	1	1	1					1	1							1	1	1	1	1	1							1	1	1	1	1	1	1	1	1	1
ospravedlňujúco	Dx	Db-------1-----	Db-------1-----	Db-------1-----	V--S---3P-AA---	Db-------1-----	Dg-------1A----	Dg-------1A----	0	1	1	0	1	1	1	1	1		1	0	0
Stúpame	VKepa+	VB-P---1P-AA---	V--P---1P-AA---	V--P---1P-AA---	V--P---1P-AA---	V--P---1P-AA---	VB-P---1P-AA---	VB-P---1P-AA---	0	1	1	1	1	1	1					1	1							1	1	1	1	1	1							1	1	1	1	1	1	1	1	1	1
po	Eu6	RR--6----------	RR--6-----------	RR--6-----------	RR--6-----------	RR--6-----------	RR--6----------	RR--6----------	0	1	1	1	1	1	1	1	1	1	1	1	1													1	1	1	1	1	1
schodíkoch	SSip6	NNIP6----------	NNIP6----------	NNIP6----------	NNIP6----------	NNIP6----------	NNIP6-----A----	NNIP6-----A----	0	1	1	1	1	1	1	1	1	1	1	1	1	1	1	1	1	1	1	1	1	1	1	1	1	1	1	1	1	1	1
ktoré	PAip1	P4IP1----------	P4IP1----------	P4IP1----------	P4IP1----------	P4NS1----------	P4IP1----------	P4IP1----------	0	1	1	1	1	1	1	1	1	1	1	1	1	1	1	1	0	1	1	1	1	1	0	1	1	1	1	1	1	1	1
jej	PFfs3	PDFS3----------	PDFS3----------	PDFS3----------	PDFS3----------	PDFS3----------	PPFS3--3-------	PPFS3--3-------	0	1	1	1	1	1	1	1	1	1	1	0	0	1	1	1	1	1	1	1	1	1	1	1	1	1	1	1	1	1	1
dali	VLjpci+	V-IP---3R-A----	V-IP---3R-A----	V-IP---3R-A----	V-IP---3R-A----	V-MP---3R-A----	VpXP---XR-AA---	VpXP---XR-AA---	0	1	1	1	1	1	1							1	1	1	0	0	0	1	1	1	1	1	1							1	1	1	1	0	0	1	1	1	1
meno	SSns4	NNNS4----------	NNNS4----------	NNNS4----------	NNNS4----------	NNNS4----------	NNNS4-----A----	NNNS4-----A----	0	1	1	1	1	1	1	1	1	1	1	1	1	1	1	1	1	1	1	1	1	1	1	1	1	1	1	1	1	1	1
a	O	J^-------------	J^-------------	J^-------------	J^-------------	J^-------------	J^-------------	J^-------------	0	1	1	1	1	1	1	1	1	1	1	1	1
mierime	VKepa+	VB-P---1P-AA---	V--P---1P-AA---	V--P---1P-AA---	V--P---1P-AA---	V--P---1P-AA---	VB-P---1P-AA---	VB-P---1P-AA---	0	1	1	1	1	1	1					1	1							1	1	1	1	1	1							1	1	1	1	1	1	1	1	1	1
na	Eu4	RR--4----------	RR--4-----------	RR--4-----------	RR--4-----------	RR--4-----------	RR--4----------	RR--4----------	0	1	1	1	1	1	1	1	1	1	1	1	1													1	1	1	1	1	1
Karlovo	AFns4x:r	AUNS4----1-----	AUNS4----1-----	AUNS4----1-----	AUNS4----1-----	AUNS4----1-----	AUNS4M---------	AUNS4M---------	0	1	1	1	1	1	1	1	1	1	1	1	1	1	1	1	1	1	1	1	1	1	1	1	1	1	1	1	1	1	1
naměstí	%	AUNS4----1-----	AUNS4----1-----	AUNS4----1-----	NNFP4----------	AUNS4----1-----	NNNS4-----A----	X@-------------	0	1	1	0	1	0	0	1	1	0	1	0	0	1	1	0	1	1		1	1	0	1	1		1	1	1	1	1
Snáď	T	TT-------------	TT-------------	TT-------------	TT-------------	TT-------------	TT--------------	TT--------------	0	1	1	1	1	1	1	1	1	1	1	1	1
bude	VBesc+	VB-S---3F-AA---	V--S---3F-AA---	V--S---3F-AA---	V--S---3F-AA---	V--S---3F-AA---	VB-S---3F-AA---	VB-S---3F-AA---	0	1	1	1	1	1	1					1	1							1	1	1	1	1	1							1	1	1	1	1	1	1	1	1	1
ešte	Dx	Db-------1-----	Db-------1-----	TT-------------	TT-------------	TT-------------	Db-------------	Db-------------	0	1	0	0	0	1	1	1	0	0	0	1	1
niečo	PFns1	PDNS1----------	PDNS1----------	PDNS1----------	PDNS1----------	PDNS1----------	PZ--1----------	PZ--1----------	0	1	1	1	1	1	1	1	1	1	1	0	0	1	1	1	1			1	1	1	1			1	1	1	1	1	1
otvorené	Gtns1x	PDNS1----------	PDNS1----------	PDNS1----------	PDNS1----------	PDNS1----------	AANS1----1A----	AANS1----1A----	0	1	1	1	1	0	0	1	1	1	1	0	0	1	1	1	1	1	1	1	1	1	1	1	1	1	1	1	1	1	1
Tá	PFfs1	PDFS1----------	PDFS1----------	PDFS1----------	PDFS1----------	PDFS1----------	PDFS1----------	PDFS1----------	0	1	1	1	1	1	1	1	1	1	1	1	1	1	1	1	1	1	1	1	1	1	1	1	1	1	1	1	1	1	1
správa	SSfs1	NNFS1----------	NNFS1----------	NNFS1----------	NNFS1----------	NNFS1----------	NNFS1-----A----	NNFS1-----A----	0	1	1	1	1	1	1	1	1	1	1	1	1	1	1	1	1	1	1	1	1	1	1	1	1	1	1	1	1	1	1
ma	PPhs4	PPxS4----------	PPxS4----------	PPxS4----------	PPxS4----------	PPxS4----------	PH-S4--1-------	PH-S4--1-------	0	1	1	1	1	1	1	1	1	1	1	0	0	1	1	1	1			1	1	1	1	1	1	1	1	1	1	1	1
zastihla	VLdscf+	V-FS---3R-AN---	V-FS---3R-AN---	V-FS---3R-AN---	V-FS---3R-AN---	V-FS---3R-AN---	VpFS---XR-AA---	VpFS---XR-AA---	0	1	1	1	1	1	1							1	1	1	1	1	1	1	1	1	1	1	1							1	1	1	1	0	0	1	1	1	1
na	Eu6	RR--6----------	RR--6-----------	RR--6-----------	RR--6-----------	RR--6-----------	RR--6----------	RR--6----------	0	1	1	1	1	1	1	1	1	1	1	1	1													1	1	1	1	1	1
dovolenke	SSfs6	NNFS6----------	NNFS6----------	NNFS6----------	NNFS6----------	NNFS6----------	NNFS6-----A----	NNFS6-----A----	0	1	1	1	1	1	1	1	1	1	1	1	1	1	1	1	1	1	1	1	1	1	1	1	1	1	1	1	1	1	1
Vieš	VKesb+	VB-S---2P-AA---	V--S---2P-AA---	V--S---2P-AA---	V--S---2P-AA---	V--S---2P-AA---	VB-S---2P-AA---	VB-S---2P-AA---	0	1	1	1	1	1	1					1	1							1	1	1	1	1	1							1	1	1	1	1	1	1	1	1	1
o	Eu6	RR--6----------	RR--6-----------	RR--6-----------	RR--6-----------	RR--6-----------	RR--6----------	RR--6----------	0	1	1	1	1	1	1	1	1	1	1	1	1													1	1	1	1	1	1
tom	PFns6	PDNS6----------	PDNS6----------	PDNS6----------	PDNS6----------	PDNS6----------	PDIS6----------	PDIS6----------	0	1	1	1	1	1	1	1	1	1	1	1	1	1	1	1	1	0	0	1	1	1	1	1	1	1	1	1	1	1	1
že	O	J^-------------	J^-------------	J^-------------	J^-------------	J^-------------	J,-------------	J,-------------	0	1	1	1	1	1	1	1	1	1	1	0	0
Jaro	SSms1:r	NNMS1----------	NNMS1----------	NNMS1----------	NNMS1----------	NNMS1----------	Dg-------1A----	Dg-------1A----	0	1	1	1	1	0	0	1	1	1	1	0	0	1	1	1	1			1	1	1	1			1	1	1	1
zomrel	VLdscm+	V-MS---3R-AN---	V-MS---3R-AN---	V-MS---3R-AN---	V-MS---3R-AN---	V-MS---3R-AN---	VpYS---XR-AA---	VpYS---XR-AA---	0	1	1	1	1	1	1							1	1	1	1	0	0	1	1	1	1	1	1							1	1	1	1	0	0	1	1	1	1
Dozvedel	VLdsam+	V-MS---1R-AN---	V-MS---1R-AN---	V-MS---1R-AN---	V-MS---1R-AN---	V-MS---1R-AN---	VpYS---XR-AA---	VpYS---XR-AA---	0	1	1	1	1	1	1							1	1	1	1	0	0	1	1	1	1	1	1							1	1	1	1	0	0	1	1	1	1
som	VKesa+	VB-S---1P-AA---	V--S---1P-AA---	V--S---1P-AA---	V--S---1P-AA---	V--S---1P-AA---	VB-S---1P-AA---	VB-S---1P-AA---	0	1	1	1	1	1	1					1	1							1	1	1	1	1	1							1	1	1	1	1	1	1	1	1	1
sa	R	VB-S---1P-AA---	V--S---1P-AA---	V--S---1P-AA---	V--S---1P-AA---	V--S---1P-AA---	P7-X4----------	P7-X4----------	0	1	1	1	1	0	0					0	0							1	1	1	1	0	0							1	1	1	1			1	1	1	1
a	O	J^-------------	J^-------------	J^-------------	J^-------------	J^-------------	J^-------------	J^-------------	0	1	1	1	1	1	1	1	1	1	1	1	1
stále	Dx	Db-------1-----	Db-------1-----	Db-------1-----	Db-------1-----	Db-------1-----	Db-------------	Db-------------	0	1	1	1	1	1	1	1	1	1	1	1	1
tomu	PFns3	PDNS3----------	PDNS3----------	PDNS3----------	PDNS3----------	PDNS3----------	PDIS3----------	PDIS3----------	0	1	1	1	1	1	1	1	1	1	1	1	1	1	1	1	1	0	0	1	1	1	1	1	1	1	1	1	1	1	1
neviem	VKesa-	VB-S---1P-NA---	V--S---1P-NA---	V--S---1P-NA---	V--S---1P-NA---	V--S---1P-NA---	VB-S---1P-NA---	VB-S---1P-NA---	0	1	1	1	1	1	1					1	1							1	1	1	1	1	1							1	1	1	1	1	1	1	1	1	1
uveriť	VId+	Vf--------AN---	Vf--------AN---	Vf--------AN---	Vf--------AN---	Vf--------AN---	Vf--------A----	Vf--------A----	0	1	1	1	1	1	1	1	1	1	1	1	1
Niektoré	PAnp4	P4NP4----------	P4NP4----------	P4NP1----------	P4NP4----------	P4NP4----------	PZNP1----------	PZNP1----------	0	1	1	1	1	1	1	1	1	1	1	0	0	1	1	1	1	1	1	1	1	1	1	1	1	1	0	1	1	0	0
úmrtia	SSnp4	NNNP4----------	NNNP4----------	NNNP1----------	NNNP4----------	NNNP4----------	NNNP1-----A----	NNNP1-----A----	0	1	1	1	1	1	1	1	1	1	1	1	1	1	1	1	1	1	1	1	1	1	1	1	1	1	0	1	1	0	0
tak	PD	PY-------------	PY-------------	TT-------------	PY-------------	PY-------------	Db-------------	Db-------------	0	1	0	1	1	0	0	1	0	1	1	0	0
akosi	PD	PY-------------	PY-------------	PY-------------	PY-------------	PY-------------	Db-------------	Db-------------	0	1	1	1	1	0	0	1	1	1	1	0	0
predpokladáme	VKepa+	VB-P---1P-AA---	V--P---1P-AA---	V--P---1P-AA---	V--P---1P-AA---	V--P---1P-AA---	VB-P---1P-AA---	VB-P---1P-AA---	0	1	1	1	1	1	1					1	1							1	1	1	1	1	1							1	1	1	1	1	1	1	1	1	1
ľudia	SSmp1	NNMP1----------	NNMP1----------	NNMP1----------	NNMP1----------	NNMP1----------	NNMP1-----A----	NNMP1-----A----	0	1	1	1	1	1	1	1	1	1	1	1	1	1	1	1	1	1	1	1	1	1	1	1	1	1	1	1	1	1	1
sa	R	NNMP1----------	NNMP1----------	NNMP1----------	NNMP1----------	NNMP1----------	P7-X4----------	P7-X4----------	0	1	1	1	1	0	0	1	1	1	1	0	0	1	1	1	1			1	1	1	1	0	0	1	1	1	1	0	0
k	Eu3	RR--3----------	RR--3-----------	RR--3-----------	RR--3-----------	RR--3-----------	RR--3----------	RR--3----------	0	1	1	1	1	1	1	1	1	1	1	1	1													1	1	1	1	1	1
nim	PFnp3	PDNP3----------	PDNP3----------	PDIP3----------	PDMP3----------	PDMP3----------	P5MP3--3-------	P5MP3--3-------	0	1	1	1	1	1	1	1	1	1	1	0	0	1	0	0	0	0	0	1	1	1	1	1	1	1	1	1	1	1	1
systematicky	Dx	Db-------1-----	Db-------1-----	Db-------1-----	Db-------1-----	Db-------1-----	Dg-------1A----	Dg-------1A----	0	1	1	1	1	1	1	1	1	1	1	0	0
dopracovávajú	VKepc+	VB-P---3P-AA---	V--P---3P-AA---	V--P---3P-AA---	V--P---3P-AA---	V--P---3P-AA---	VB-P---3P-AA---	VB-P---3P-AA---	0	1	1	1	1	1	1					1	1							1	1	1	1	1	1							1	1	1	1	1	1	1	1	1	1
Jaro	SSms1:r	NNMS1----------	NNMS1----------	NNMS1----------	NNMS1----------	NNMS1----------	Dg-------1A----	Dg-------1A----	0	1	1	1	1	0	0	1	1	1	1	0	0	1	1	1	1			1	1	1	1			1	1	1	1
nebol	VLescm-	V-MS---3R-NA---	V-MS---3R-NA---	V-MS---3R-NA---	V-MS---3R-NA---	V-MS---3R-NA---	VpYS---XR-NA---	VpYS---XR-NA---	0	1	1	1	1	1	1							1	1	1	1	0	0	1	1	1	1	1	1							1	1	1	1	0	0	1	1	1	1
bohém	SSms1	NNMS1----------	NNMS1----------	NNMS1----------	NNMS1----------	NNMS1----------	NNMS1-----A----	NNMS1-----A----	0	1	1	1	1	1	1	1	1	1	1	1	1	1	1	1	1	1	1	1	1	1	1	1	1	1	1	1	1	1	1
Stále	Dx	Db-------1-----	Db-------1-----	Db-------1-----	Db-------1-----	Db-------1-----	Db-------------	Db-------------	0	1	1	1	1	1	1	1	1	1	1	1	1
v	Eu6	RR--6----------	RR--6-----------	RR--6-----------	RR--6-----------	RR--6-----------	RR--6----------	RR--6----------	0	1	1	1	1	1	1	1	1	1	1	1	1													1	1	1	1	1	1
pohybe	SSis6	NNIS6----------	NNIS6----------	NNIS6----------	NNIS6----------	NNIS6----------	NNIS6-----A----	NNIS6-----A----	0	1	1	1	1	1	1	1	1	1	1	1	1	1	1	1	1	1	1	1	1	1	1	1	1	1	1	1	1	1	1
akumulátor	SSis1	NNIS1----------	NNIS1----------	NNIS1----------	NNIS1----------	NNIS1----------	NNIS1-----A----	NNIS1-----A----	0	1	1	1	1	1	1	1	1	1	1	1	1	1	1	1	1	1	1	1	1	1	1	1	1	1	1	1	1	1	1
energie	SSfs2	NNFS2----------	NNFS2----------	NNFS2----------	NNFS2----------	NNFS2----------	NNFS2-----A----	NNFS2-----A----	0	1	1	1	1	1	1	1	1	1	1	1	1	1	1	1	1	1	1	1	1	1	1	1	1	1	1	1	1	1	1
a	O	J^-------------	J^-------------	J^-------------	J^-------------	J^-------------	J^-------------	J^-------------	0	1	1	1	1	1	1	1	1	1	1	1	1
nápadov	SSip2	NNIP2----------	NNIP2----------	NNIP2----------	NNIP2----------	NNIP2----------	NNIP2-----A----	NNIP2-----A----	0	1	1	1	1	1	1	1	1	1	1	1	1	1	1	1	1	1	1	1	1	1	1	1	1	1	1	1	1	1	1
Pozdravuj	VMesb+	V--S---2--AA---	V--S---2--AA---	V--S---2--AA---	V--S---2--AA---	V--S---2--AA---	Vi-S---2--A----	Vi-S---2--A----	0	1	1	1	1	1	1													1	1	1	1	1	1							1	1	1	1	1	1
Deža	SSms4:r	NNMS4----------	NNMS4----------	NNMS4----------	V--S---2--AA---	NNMS4----------	NNMXX-----A----	X@-------------	0	1	1	0	1	1	0	1	1		1	1	0	1	1		1	1		1	1	1	1	0		1	1		1	0
Marian	SSms1:r	NNMS1----------	NNMS1----------	NNMS1----------	NNMS1----------	NNMS1----------	NNFP2-----A----	NNFP2-----A----	0	1	1	1	1	1	1	1	1	1	1	1	1	1	1	1	1	0	0	1	1	1	1	0	0	1	1	1	1	0	0
Jaslovský	SAms1:r	NxMS1----------	NxMS1----------	NxMS1----------	NxMS1----------	NxMS1----------	AAIS1----1A----	AAIS1----1A----	0	1	1	1	1	0	0	1	1	1	1	0	0	1	1	1	1	0	0	1	1	1	1	1	1	1	1	1	1	1	1
Takže	T	TT-------------	TT-------------	TT-------------	J^-------------	TT-------------	J,-------------	J,-------------	0	1	1	0	1	0	0	1	1	0	1	0	0
ak	O	J^-------------	J^-------------	J^-------------	J^-------------	J^-------------	J,-------------	J,-------------	0	1	1	1	1	1	1	1	1	1	1	0	0
sa	R	J^-------------	J^-------------	J^-------------	J^-------------	J^-------------	P7-X4----------	P7-X4----------	0	1	1	1	1	0	0	1	1	1	1	0	0
myšlienky	SSfs2	NNFS2----------	NNFS2----------	NNFP1----------	NNFS2----------	NNFS2----------	NNFP1-----A----	NNFP1-----A----	0	1	1	1	1	1	1	1	1	1	1	1	1	1	1	1	1	1	1	1	0	1	1	0	0	1	0	1	1	0	0
zorganizovať	VId+	Vf--------AN---	Vf--------AN---	Vf--------AN---	Vf--------AN---	Vf--------AN---	Vf--------A----	Vf--------A----	0	1	1	1	1	1	1	1	1	1	1	1	1
rockový	AAis4x	AAIS4----1-----	AAIS4----1-----	AAIS4----1-----	AAIS4----1-----	AAIS4----1-----	AAIS4----1A----	AAIS4----1A----	0	1	1	1	1	1	1	1	1	1	1	1	1	1	1	1	1	1	1	1	1	1	1	1	1	1	1	1	1	1	1
festival	SSis4	NNIS4----------	NNIS4----------	NNIS4----------	NNIS4----------	NNIS4----------	NNIS4-----A----	NNIS4-----A----	0	1	1	1	1	1	1	1	1	1	1	1	1	1	1	1	1	1	1	1	1	1	1	1	1	1	1	1	1	1	1
chytí	VKdsc+	VB-S---3P-AN---	V--S---3P-AN---	V--S---3P-AN---	V--S---3P-AN---	V--S---3P-AN---	VB-S---3P-AA---	VB-S---3P-AA---	0	1	1	1	1	1	1					1	1							1	1	1	1	1	1							1	1	1	1	1	1	1	1	1	1
skúsenejší	AAms1y	AAMS1----2-----	AAMS1----2-----	AAMS1----2-----	AAMS1----3-----	AAMS1----2-----	AAMS1----2A----	AAMS1----2A----	0	1	1	1	1	1	1	1	1	1	1	1	1	1	1	1	1	1	1	1	1	1	1	1	1	1	1	1	1	1	1
organizátor	SSms1	NNMS1----------	NNMS1----------	NNMS1----------	NNMS1----------	NNMS1----------	NNMS1-----A----	NNMS1-----A----	0	1	1	1	1	1	1	1	1	1	1	1	1	1	1	1	1	1	1	1	1	1	1	1	1	1	1	1	1	1	1
veríme	VKepa+	VB-P---1P-AA---	V--P---1P-AA---	V--P---1P-AA---	V--P---1P-AA---	V--P---1P-AA---	VB-P---1P-AA---	VB-P---1P-AA---	0	1	1	1	1	1	1					1	1							1	1	1	1	1	1							1	1	1	1	1	1	1	1	1	1
že	O	J^-------------	J^-------------	J^-------------	J^-------------	J^-------------	J,-------------	J,-------------	0	1	1	1	1	1	1	1	1	1	1	0	0
festival	SSis1	NNIS1----------	NNIS1----------	NNIS1----------	NNIS1----------	NNIS1----------	NNIS1-----A----	NNIS1-----A----	0	1	1	1	1	1	1	1	1	1	1	1	1	1	1	1	1	1	1	1	1	1	1	1	1	1	1	1	1	1	1
ktorému	PAis3	P4IS3----------	P4IS3----------	P4IS3----------	P4IS3----------	P4IS3----------	P4IS3----------	P4IS3----------	0	1	1	1	1	1	1	1	1	1	1	1	1	1	1	1	1	1	1	1	1	1	1	1	1	1	1	1	1	1	1
je	VKesc+	VB-S---3P-AA---	V--S---3P-AA---	V--S---3P-AA---	V--S---3P-AA---	V--S---3P-AA---	VB-S---3P-AA---	VB-S---3P-AA---	0	1	1	1	1	1	1					1	1							1	1	1	1	1	1							1	1	1	1	1	1	1	1	1	1
dedina	SSfs1	NNFS1----------	NNFS1----------	NNFS1----------	NNFS1----------	NNFS1----------	NNFS1-----A----	NNFS1-----A----	0	1	1	1	1	1	1	1	1	1	1	1	1	1	1	1	1	1	1	1	1	1	1	1	1	1	1	1	1	1	1
a	O	J^-------------	J^-------------	J^-------------	J^-------------	J^-------------	J^-------------	J^-------------	0	1	1	1	1	1	1	1	1	1	1	1	1
ľudia	SSmp1	NNMP1----------	NNMP1----------	NNMP1----------	NNMP1----------	NNMP1----------	NNMP1-----A----	NNMP1-----A----	0	1	1	1	1	1	1	1	1	1	1	1	1	1	1	1	1	1	1	1	1	1	1	1	1	1	1	1	1	1	1
v	Eu6	RR--6----------	RR--6-----------	RR--6-----------	RR--6-----------	RR--6-----------	RR--6----------	RR--6----------	0	1	1	1	1	1	1	1	1	1	1	1	1													1	1	1	1	1	1
nej	PFfs6	PDFS6----------	PDFS6----------	PDFS6----------	PDFS6----------	PDFS6----------	P5FS6--3-------	P5FS6--3-------	0	1	1	1	1	1	1	1	1	1	1	0	0	1	1	1	1	1	1	1	1	1	1	1	1	1	1	1	1	1	1
naklonení	Gtmp1x	PDFS6----------	PDFS6----------	PDFS6----------	PDFS6----------	PDFS6----------	VsMP---XX-AP---	VsMP---XX-AP---	0	1	1	1	1	0	0	1	1	1	1	0	0	1	1	1	1	0	0	1	1	1	1	0	0	1	1	1	1
sa	R	PDFS6----------	PDFS6----------	PDFS6----------	Z:------------	PDFS6----------	P7-X4----------	P7-X4----------	0	1	1	0	1	1	1	1	1	0	1	0	0	1	1		1			1	1		1	0	0	1	1		1	0	0
bude	VBesc+	VB-S---3F-AA---	V--S---3F-AA---	V--S---3F-AA---	V--S---3F-AA---	V--S---3F-AA---	VB-S---3F-AA---	VB-S---3F-AA---	0	1	1	1	1	1	1					1	1							1	1	1	1	1	1							1	1	1	1	1	1	1	1	1	1
znova	Dx	Db-------1-----	Db-------1-----	Db-------1-----	Db-------1-----	Db-------1-----	Db-------------	Db-------------	0	1	1	1	1	1	1	1	1	1	1	1	1
konať	VIe+	Vf--------AA---	Vf--------AA---	Vf--------AA---	Vf--------AA---	Vf--------AA---	Vf--------A----	Vf--------A----	0	1	1	1	1	1	1	1	1	1	1	1	1
Neostanú	VKdpc-	VB-P---3P-NN---	V--P---3P-NN---	V--P---3P-NN---	V--P---3P-NN---	V--P---3P-NN---	VB-P---3P-NA---	VB-P---3P-NA---	0	1	1	1	1	1	1					1	1							1	1	1	1	1	1							1	1	1	1	1	1	1	1	1	1
však	T	TT-------------	TT-------------	TT-------------	TT-------------	TT-------------	J^-------------	J^-------------	0	1	1	1	1	0	0	1	1	1	1	0	0
verní	AAmp1x	AAMP1----1-----	AAMP1----1-----	AAMP1----1-----	AAMP1----1-----	AAMP1----1-----	AAMP1----1A----	AAMP1----1A----	0	1	1	1	1	1	1	1	1	1	1	1	1	1	1	1	1	1	1	1	1	1	1	1	1	1	1	1	1	1	1
fanúšikovia	SSmp1	NNMP1----------	NNMP1----------	NNMP1----------	NNMP1----------	NNMP1----------	NNMP1-----A----	NNMP1-----A----	0	1	1	1	1	1	1	1	1	1	1	1	1	1	1	1	1	1	1	1	1	1	1	1	1	1	1	1	1	1	1
skrátka	Dx	Db-------1-----	Db-------1-----	TT-------------	Db-------1-----	Db-------1-----	Db-------------	Db-------------	0	1	0	1	1	1	1	1	0	1	1	1	1
Okrem	Eu2	RR--2----------	RR--2-----------	RR--2-----------	RR--2-----------	RR--2-----------	RR--2----------	RR--2----------	0	1	1	1	1	1	1	1	1	1	1	1	1													1	1	1	1	1	1
chuti	SSfs2	NNFS2----------	NNFS2----------	NNFS2----------	NNFS2----------	NNFS2----------	NNFS2-----A----	NNFS2-----A----	0	1	1	1	1	1	1	1	1	1	1	1	1	1	1	1	1	1	1	1	1	1	1	1	1	1	1	1	1	1	1
ma	PPhs4	PPxS4----------	PPxS4----------	PPxS4----------	PPxS4----------	PPxS4----------	PH-S4--1-------	PH-S4--1-------	0	1	1	1	1	1	1	1	1	1	1	0	0	1	1	1	1			1	1	1	1	1	1	1	1	1	1	1	1
kuskus	SSis1	NNIS1----------	NNIS1----------	NNIS1----------	NNIS1----------	NNIS1----------	NNIS1-----A----	NNIS1-----A----	0	1	1	1	1	1	1	1	1	1	1	1	1	1	1	1	1	1	1	1	1	1	1	1	1	1	1	1	1	1	1
zaujal	VLdsci+	V-IS---3R-AN---	V-IS---3R-AN---	V-IS---3R-AN---	V-IS---3R-AN---	V-IS---3R-AN---	VpYS---XR-AA---	VpYS---XR-AA---	0	1	1	1	1	1	1							1	1	1	1	0	0	1	1	1	1	1	1							1	1	1	1	0	0	1	1	1	1
predovšetkým	T	TT-------------	TT-------------	TT-------------	TT-------------	TT-------------	Db-------------	Db-------------	0	1	1	1	1	0	0	1	1	1	1	0	0
svojou	PFfs7	PDFS7----------	PDFS7----------	PDFS7----------	PDFS7----------	PDFS7----------	P8FS7----------	P8FS7----------	0	1	1	1	1	1	1	1	1	1	1	0	0	1	1	1	1	1	1	1	1	1	1	1	1	1	1	1	1	1	1
univerzálnosťou	SSfs7	NNFS7----------	NNFS7----------	NNFS7----------	NNFS7----------	NNFS7----------	NNFS7-----A----	NNFS7-----A----	0	1	1	1	1	1	1	1	1	1	1	1	1	1	1	1	1	1	1	1	1	1	1	1	1	1	1	1	1	1	1
A	O	J^-------------	J^-------------	J^-------------	J^-------------	J^-------------	J^-------------	J^-------------	0	1	1	1	1	1	1	1	1	1	1	1	1
určite	T	TT-------------	TT-------------	TT-------------	TT-------------	TT-------------	Dg-------1A----	Dg-------1A----	0	1	1	1	1	0	0	1	1	1	1	0	0
si	R	TT-------------	TT-------------	TT-------------	TT-------------	TT-------------	P7-X3----------	P7-X3----------	0	1	1	1	1	0	0	1	1	1	1	0	0
vyskúšajte	VMdpb+	V--P---2--AN---	V--P---2--AN---	V--P---2--AN---	V--P---2--AN---	V--P---2--AN---	Vi-P---2--A----	Vi-P---2--A----	0	1	1	1	1	1	1													1	1	1	1	1	1							1	1	1	1	1	1
tento	PFis4	PDIS4----------	PDIS4----------	PDIS4----------	PDIS4----------	PDIS4----------	PDIS4----------	PDIS4----------	0	1	1	1	1	1	1	1	1	1	1	1	1	1	1	1	1	1	1	1	1	1	1	1	1	1	1	1	1	1	1
recept	SSis4	NNIS4----------	NNIS4----------	NNIS4----------	NNIS4----------	NNIS4----------	NNIS4-----A----	NNIS4-----A----	0	1	1	1	1	1	1	1	1	1	1	1	1	1	1	1	1	1	1	1	1	1	1	1	1	1	1	1	1	1	1
Vysypte	VMdpb+	V--P---2--AN---	V--P---2--AN---	V--P---2--AN---	V--P---2--AN---	V--P---2--AN---	Vi-P---2--A----	Vi-P---2--A----	0	1	1	1	1	1	1													1	1	1	1	1	1							1	1	1	1	1	1
do	Eu2	RR--2----------	RR--2-----------	RR--2-----------	RR--2-----------	RR--2-----------	RR--2----------	RR--2----------	0	1	1	1	1	1	1	1	1	1	1	1	1													1	1	1	1	1	1
nej	PFfs2	PDFS2----------	PDFS2----------	PDFS2----------	PDFS2----------	PDFS2----------	P5FS2--3-------	P5FS2--3-------	0	1	1	1	1	1	1	1	1	1	1	0	0	1	1	1	1	1	1	1	1	1	1	1	1	1	1	1	1	1	1
kuskus	SSis4	NNIS4----------	NNIS4----------	NNIS4----------	NNIS4----------	NNIS4----------	NNIS4-----A----	NNIS4-----A----	0	1	1	1	1	1	1	1	1	1	1	1	1	1	1	1	1	1	1	1	1	1	1	1	1	1	1	1	1	1	1
a	O	J^-------------	J^-------------	J^-------------	J^-------------	J^-------------	J^-------------	J^-------------	0	1	1	1	1	1	1	1	1	1	1	1	1
vypnite	VMdpb+	V--P---2--AN---	V--P---2--AN---	V--P---2--AN---	V--P---2--AN---	V--P---2--AN---	Vi-P---2--A----	Vi-P---2--A----	0	1	1	1	1	1	1													1	1	1	1	1	1							1	1	1	1	1	1
oheň	SSis4	NNIS4----------	NNIS4----------	NNIS4----------	NNIS4----------	NNIS4----------	NNIS4-----A----	NNIS4-----A----	0	1	1	1	1	1	1	1	1	1	1	1	1	1	1	1	1	1	1	1	1	1	1	1	1	1	1	1	1	1	1
Zakryte	VMdpb+	V--P---2--AN---	V--P---2--AN---	V--P---2--AN---	V--P---2--AN---	V--P---2--AN---	Vi-P---2--A----	Vi-P---2--A----	0	1	1	1	1	1	1													1	1	1	1	1	1							1	1	1	1	1	1
nádobu	SSfs4	NNFS4----------	NNFS4----------	NNFS4----------	NNFS4----------	NNFS4----------	NNFS4-----A----	NNFS4-----A----	0	1	1	1	1	1	1	1	1	1	1	1	1	1	1	1	1	1	1	1	1	1	1	1	1	1	1	1	1	1	1
pokrievkou	SSfs7	NNFS7----------	NNFS7----------	NNFS7----------	NNFS7----------	NNFS7----------	NNFS7-----A----	NNFS7-----A----	0	1	1	1	1	1	1	1	1	1	1	1	1	1	1	1	1	1	1	1	1	1	1	1	1	1	1	1	1	1	1
a	O	J^-------------	J^-------------	J^-------------	J^-------------	J^-------------	J^-------------	J^-------------	0	1	1	1	1	1	1	1	1	1	1	1	1
nechajte	VMdpb+	V--P---2--AN---	V--P---2--AN---	V--P---2--AN---	V--P---2--AN---	V--P---2--AN---	Vi-P---2--A----	Vi-P---2--A----	0	1	1	1	1	1	1													1	1	1	1	1	1							1	1	1	1	1	1
vychladnúť	VId+	Vf--------AN---	Vf--------AN---	Vf--------AN---	Vf--------AN---	Vf--------AN---	Vf--------A----	Vf--------A----	0	1	1	1	1	1	1	1	1	1	1	1	1
na	Eu4	RR--4----------	RR--4-----------	RR--4-----------	RR--4-----------	RR--4-----------	RR--4----------	RR--4----------	0	1	1	1	1	1	1	1	1	1	1	1	1													1	1	1	1	1	1
izbovú	AAfs4x	AAFS4----1-----	AAFS4----1-----	AAFS4----1-----	AAFS4----1-----	AAFS4----1-----	AAFS4----1A----	AAFS4----1A----	0	1	1	1	1	1	1	1	1	1	1	1	1	1	1	1	1	1	1	1	1	1	1	1	1	1	1	1	1	1	1
teplotu	SSfs4	NNFS4----------	NNFS4----------	NNFS4----------	NNFS4----------	NNFS4----------	NNFS4-----A----	NNFS4-----A----	0	1	1	1	1	1	1	1	1	1	1	1	1	1	1	1	1	1	1	1	1	1	1	1	1	1	1	1	1	1	1
V	Eu6	RR--6----------	RR--6-----------	RR--6-----------	RR--6-----------	RR--6-----------	RR--6----------	RR--6----------	0	1	1	1	1	1	1	1	1	1	1	1	1													1	1	1	1	1	1
šalátovej	AAfs6x	AAFS6----1-----	AAFS6----1-----	AAFS6----1-----	AAFS6----1-----	AAFS6----1-----	AAFS6----1A----	AAFS6----1A----	0	1	1	1	1	1	1	1	1	1	1	1	1	1	1	1	1	1	1	1	1	1	1	1	1	1	1	1	1	1	1
mise	SSfs6	NNFS6----------	NNFS6----------	NNFS6----------	NNFS6----------	NNFS6----------	NNFS6-----A----	NNFS6-----A----	0	1	1	1	1	1	1	1	1	1	1	1	1	1	1	1	1	1	1	1	1	1	1	1	1	1	1	1	1	1	1
zmiešajte	VMdpb+	V--P---2--AN---	V--P---2--AN---	V--P---2--AN---	V--P---2--AN---	V--P---2--AN---	Vi-P---2--A----	Vi-P---2--A----	0	1	1	1	1	1	1													1	1	1	1	1	1							1	1	1	1	1	1
olej	SSis4	NNIS4----------	NNIS4----------	NNIS4----------	NNIS4----------	NNIS4----------	NNIS4-----A----	NNIS4-----A----	0	1	1	1	1	1	1	1	1	1	1	1	1	1	1	1	1	1	1	1	1	1	1	1	1	1	1	1	1	1	1
korenie	SSns4	NNNS4----------	NNNS4----------	NNNS4----------	NNNS4----------	NNNS4----------	NNNS4-----A----	NNNS4-----A----	0	1	1	1	1	1	1	1	1	1	1	1	1	1	1	1	1	1	1	1	1	1	1	1	1	1	1	1	1	1	1
soľ	SSfs4	NNFS4----------	NNFS4----------	NNFS4----------	NNFS4----------	NNFS4----------	NNFS4-----A----	NNFS4-----A----	0	1	1	1	1	1	1	1	1	1	1	1	1	1	1	1	1	1	1	1	1	1	1	1	1	1	1	1	1	1	1
uhorku	SSfs4	NNFS4----------	NNFS4----------	NNFS4----------	NNFS4----------	NNFS4----------	NNFS4-----A----	NNFS4-----A----	0	1	1	1	1	1	1	1	1	1	1	1	1	1	1	1	1	1	1	1	1	1	1	1	1	1	1	1	1	1	1
cibuľu	SSfs4	NNFS4----------	NNFS4----------	NNFS4----------	NNFS4----------	NNFS4----------	NNFS4-----A----	NNFS4-----A----	0	1	1	1	1	1	1	1	1	1	1	1	1	1	1	1	1	1	1	1	1	1	1	1	1	1	1	1	1	1	1
petržlenovú	AAfs4x	AAFS4----1-----	AAFS4----1-----	AAFS4----1-----	AAFS4----1-----	AAFS4----1-----	AAFS4----1A----	AAFS4----1A----	0	1	1	1	1	1	1	1	1	1	1	1	1	1	1	1	1	1	1	1	1	1	1	1	1	1	1	1	1	1	1
vňať	SSfs4	NNFS4----------	NNFS4----------	NNFS4----------	NNFS4----------	NNFS4----------	NNFS4-----A----	NNFS4-----A----	0	1	1	1	1	1	1	1	1	1	1	1	1	1	1	1	1	1	1	1	1	1	1	1	1	1	1	1	1	1	1
a	O	J^-------------	J^-------------	J^-------------	J^-------------	J^-------------	J^-------------	J^-------------	0	1	1	1	1	1	1	1	1	1	1	1	1
bazalku	SSfs4	NNFS4----------	NNFS4----------	NNFS4----------	NNFS4----------	NNFS4----------	NNFS4-----A----	NNFS4-----A----	0	1	1	1	1	1	1	1	1	1	1	1	1	1	1	1	1	1	1	1	1	1	1	1	1	1	1	1	1	1	1
Taniere	SSip4	NNIP4----------	NNIP4----------	NNIP4----------	NNIP4----------	NNIP4----------	NNIP1-----A----	NNIP1-----A----	0	1	1	1	1	1	1	1	1	1	1	1	1	1	1	1	1	1	1	1	1	1	1	1	1	1	1	1	1	0	0
obložte	VMdpb+	V--P---2--AN---	V--P---2--AN---	V--P---2--AN---	V--P---2--AN---	V--P---2--AN---	Vi-P---2--A----	Vi-P---2--A----	0	1	1	1	1	1	1													1	1	1	1	1	1							1	1	1	1	1	1
hlávkovým	AAis7x	AAIS7----1-----	AAIS7----1-----	AAIS7----1-----	AAIS7----1-----	AAIS7----1-----	AAIS7----1A----	AAIS7----1A----	0	1	1	1	1	1	1	1	1	1	1	1	1	1	1	1	1	1	1	1	1	1	1	1	1	1	1	1	1	1	1
šalátom	SSis7	NNIS7----------	NNIS7----------	NNIS7----------	NNIS7----------	NNIS7----------	NNIS7-----A----	NNIS7-----A----	0	1	1	1	1	1	1	1	1	1	1	1	1	1	1	1	1	1	1	1	1	1	1	1	1	1	1	1	1	1	1
na	Eu4	RR--4----------	RR--4-----------	RR--4-----------	RR--4-----------	RR--4-----------	RR--4----------	RR--4----------	0	1	1	1	1	1	1	1	1	1	1	1	1													1	1	1	1	1	1
ktorý	PAis4	P4IS4----------	P4IS4----------	P4IS4----------	P4IS4----------	P4IS4----------	P4IS4----------	P4IS4----------	0	1	1	1	1	1	1	1	1	1	1	1	1	1	1	1	1	1	1	1	1	1	1	1	1	1	1	1	1	1	1
servírujte	VMjpb+	V--P---2--A----	V--P---2--A----	V--P---2--A----	V--P---2--AA---	V--P---2--A----	Vi-P---2--A----	Vi-P---2--A----	0	1	1	1	1	1	1													1	1	1	1	1	1							1	1	1	1	1	1
kuskus	SSis4	NNIS4----------	NNIS4----------	NNIS4----------	NNIS4----------	NNIS4----------	NNIS4-----A----	NNIS4-----A----	0	1	1	1	1	1	1	1	1	1	1	1	1	1	1	1	1	1	1	1	1	1	1	1	1	1	1	1	1	1	1
a	O	J^-------------	J^-------------	J^-------------	J^-------------	J^-------------	J^-------------	J^-------------	0	1	1	1	1	1	1	1	1	1	1	1	1
zeleninovú	AAfs4x	AAFS4----1-----	AAFS4----1-----	AAFS4----1-----	AAFS4----1-----	AAFS4----1-----	AAFS4----1A----	AAFS4----1A----	0	1	1	1	1	1	1	1	1	1	1	1	1	1	1	1	1	1	1	1	1	1	1	1	1	1	1	1	1	1	1
zmes	SSfs4	NNFS4----------	NNFS4----------	NNFS4----------	NNFS4----------	NNFS4----------	NNFS4-----A----	NNFS4-----A----	0	1	1	1	1	1	1	1	1	1	1	1	1	1	1	1	1	1	1	1	1	1	1	1	1	1	1	1	1	1	1
Dobrú	AAfs4x	AAFS4----1-----	AAFS4----1-----	AAFS4----1-----	AAFS4----1-----	AAFS4----1-----	AAFS4----1A----	AAFS4----1A----	0	1	1	1	1	1	1	1	1	1	1	1	1	1	1	1	1	1	1	1	1	1	1	1	1	1	1	1	1	1	1
chuť	SSfs4	NNFS4----------	NNFS4----------	NNFS4----------	NNFS4----------	NNFS4----------	NNFS4-----A----	NNFS4-----A----	0	1	1	1	1	1	1	1	1	1	1	1	1	1	1	1	1	1	1	1	1	1	1	1	1	1	1	1	1	1	1
Samozrejmosťou	SSfs7	NNFS7----------	NNFS7----------	NNFS7----------	NNFS7----------	NNFS7----------	NNFS7-----A----	NNFS7-----A----	0	1	1	1	1	1	1	1	1	1	1	1	1	1	1	1	1	1	1	1	1	1	1	1	1	1	1	1	1	1	1
sú	VKepc+	VB-P---3P-AA---	V--P---3P-AA---	V--P---3P-AA---	V--P---3P-AA---	V--P---3P-AA---	VB-P---3P-AA---	VB-P---3P-AA---	0	1	1	1	1	1	1					1	1							1	1	1	1	1	1							1	1	1	1	1	1	1	1	1	1
profily	SSip1	NNIP1----------	NNIP1----------	NNIP1----------	NNIP1----------	NNIP1----------	NNIP1-----A----	NNIP1-----A----	0	1	1	1	1	1	1	1	1	1	1	1	1	1	1	1	1	1	1	1	1	1	1	1	1	1	1	1	1	1	1
fotoaparátov	SSip2	NNIP2----------	NNIP2----------	NNIP2----------	NNIP2----------	NNIP2----------	NNIP2-----A----	NNIP2-----A----	0	1	1	1	1	1	1	1	1	1	1	1	1	1	1	1	1	1	1	1	1	1	1	1	1	1	1	1	1	1	1
Johnovi	SSms3:r	NNMS3----------	NNMS3----------	NNMS3----------	NNMS3----------	NNMS3----------	NNMS3-----A----	NNMS3-----A----	0	1	1	1	1	1	1	1	1	1	1	1	1	1	1	1	1	1	1	1	1	1	1	1	1	1	1	1	1	1	1
Lee	SFms3:r	NxMS3----------	NxMS3----------	NxMS3----------	NNMS1----------	NxMS3----------	NNMS3-----A----	X@-------------	0	1	1	1	1	1	0	1	1	0	1	0	0	1	1	1	1	1		1	1	1	1	1		1	1	0	1	1
Hookerovi	SSms3:r	NNMS3----------	NNMS3----------	NNMS3----------	NNMS3----------	NNMS3----------	NNMS3-----A----	X@-------------	0	1	1	1	1	1	0	1	1	1	1	1	0	1	1	1	1	1		1	1	1	1	1		1	1	1	1	1
sa	R	NNMS3----------	NNMS3----------	NNMS3----------	NNMS3----------	NNMS3----------	P7-X4----------	P7-X4----------	0	1	1	1	1	0	0	1	1	1	1	0	0	1	1	1	1			1	1	1	1	0	0	1	1	1	1	0	0
toto	PFns1	PDNS1----------	PDNS1----------	PDNS1----------	PDNS1----------	PDNS1----------	PDNS1----------	PDNS1----------	0	1	1	1	1	1	1	1	1	1	1	1	1	1	1	1	1	1	1	1	1	1	1	1	1	1	1	1	1	1	1
všetko	PFns1	PDNS1----------	PDNS1----------	PDNS1----------	PDNS1----------	PDNS1----------	PLNS1----------	PLNS1----------	0	1	1	1	1	1	1	1	1	1	1	0	0	1	1	1	1	1	1	1	1	1	1	1	1	1	1	1	1	1	1
podarilo	VLdscn+	V-NX---3R-AN---	V-NX---3R-AN---	V-NX---3R-AN---	V-NX---3R-AN---	V-NX---3R-AN---	VpNS---XR-AA---	VpNS---XR-AA---	0	1	1	1	1	1	1							1	1	1	1	1	1	1	1	1	1	0	0							1	1	1	1	0	0	1	1	1	1
Poznáte	VKepb+	VB-P---2P-AA---	V--P---2P-AA---	V--P---2P-AA---	V--P---2P-AA---	V--P---2P-AA---	VB-P---2P-AA---	VB-P---2P-AA---	0	1	1	1	1	1	1					1	1							1	1	1	1	1	1							1	1	1	1	1	1	1	1	1	1
to	PFns4	PDNS4----------	PDNS4----------	PDNS4----------	PDNS4----------	PDNS4----------	PDNS4----------	PDNS4----------	0	1	1	1	1	1	1	1	1	1	1	1	1	1	1	1	1	1	1	1	1	1	1	1	1	1	1	1	1	1	1
Noviny	SSfp4	NNFP4----------	NNFP4----------	NNFP4----------	NNFP4----------	NNFP4----------	NNFP4-----A----	NNFP4-----A----	0	1	1	1	1	1	1	1	1	1	1	1	1	1	1	1	1	1	1	1	1	1	1	1	1	1	1	1	1	1	1
ste	VKepb+	VB-P---2P-AA---	V--P---2P-AA---	V--P---2P-AA---	V--P---2P-AA---	V--P---2P-AA---	VB-P---2P-AA---	VB-P---2P-AA---	0	1	1	1	1	1	1					1	1							1	1	1	1	1	1							1	1	1	1	1	1	1	1	1	1
zabudli	VLdpbh+	V-HP---2R-AN---	V-HP---2R-AN---	V-HP---2R-AN---	V-HP---2R-AN---	V-HP---2R-AN---	VpXP---XR-AA---	VpXP---XR-AA---	0	1	1	1	1	1	1							1	1	1	1	0	0	1	1	1	1	1	1							1	1	1	1	0	0	1	1	1	1
v	Eu6	RR--6----------	RR--6-----------	RR--6-----------	RR--6-----------	RR--6-----------	RR--6----------	RR--6----------	0	1	1	1	1	1	1	1	1	1	1	1	1													1	1	1	1	1	1
kaviarni	SSfs6	NNFS6----------	NNFS6----------	NNFS6----------	NNFS6----------	NNFS6----------	NNFS6-----A----	NNFS6-----A----	0	1	1	1	1	1	1	1	1	1	1	1	1	1	1	1	1	1	1	1	1	1	1	1	1	1	1	1	1	1	1
letáky	SSip4	NNIP4----------	NNIP4----------	NNIP4----------	NNIP4----------	NNIP4----------	NNIP4-----A----	NNIP4-----A----	0	1	1	1	1	1	1	1	1	1	1	1	1	1	1	1	1	1	1	1	1	1	1	1	1	1	1	1	1	1	1
neznášate	VKepb-	VB-P---2P-NA---	V--P---2P-NA---	V--P---2P-NA---	V--P---2P-NA---	V--P---2P-NA---	VB-P---2P-NA---	VB-P---2P-NA---	0	1	1	1	1	1	1					1	1							1	1	1	1	1	1							1	1	1	1	1	1	1	1	1	1
To	PFns1	PDNS1----------	PDNS1----------	PDNS1----------	PDNS1----------	PDNS1----------	PDNS1----------	PDNS1----------	0	1	1	1	1	1	1	1	1	1	1	1	1	1	1	1	1	1	1	1	1	1	1	1	1	1	1	1	1	1	1
je	VKesc+	VB-S---3P-AA---	V--S---3P-AA---	V--S---3P-AA---	V--S---3P-AA---	V--S---3P-AA---	VB-S---3P-AA---	VB-S---3P-AA---	0	1	1	1	1	1	1					1	1							1	1	1	1	1	1							1	1	1	1	1	1	1	1	1	1
zjednodušené	Gtns1x	VB-S---3P-AA---	V--S---3P-AA---	V--S---3P-AA---	V--S---3P-AA---	V--S---3P-AA---	AANS1----1A----	AANS1----1A----	0	1	1	1	1	0	0					0	0							1	1	1	1	1	1							1	1	1	1			1	1	1	1
a	O	J^-------------	J^-------------	J^-------------	J^-------------	J^-------------	J^-------------	J^-------------	0	1	1	1	1	1	1	1	1	1	1	1	1
časovo	Dx	Db-------1-----	Db-------1-----	Db-------1-----	Db-------1-----	Db-------1-----	Dg-------1A----	Dg-------1A----	0	1	1	1	1	1	1	1	1	1	1	0	0
nenáročné	AAns1x	AANS1----1-----	AANS1----1-----	AANS1----1-----	AANS1----1-----	AANS1----1-----	AANS1----1N----	AANS1----1N----	0	1	1	1	1	1	1	1	1	1	1	1	1	1	1	1	1	1	1	1	1	1	1	1	1	1	1	1	1	1	1
riešenie	SSns1	NNNS1----------	NNNS1----------	NNNS1----------	NNNS1----------	NNNS1----------	NNNS1-----A----	NNNS1-----A----	0	1	1	1	1	1	1	1	1	1	1	1	1	1	1	1	1	1	1	1	1	1	1	1	1	1	1	1	1	1	1
Články	SSip1	NNIP1----------	NNIP1----------	NNIP1----------	NNIP1----------	NNIP1----------	NNIP1-----A----	NNIP1-----A----	0	1	1	1	1	1	1	1	1	1	1	1	1	1	1	1	1	1	1	1	1	1	1	1	1	1	1	1	1	1	1
zaujímavosti	SSfp1	NNFP1----------	NNFP1----------	NNFP1----------	NNFP1----------	NNFP1----------	NNFS2-----A----	NNFS2-----A----	0	1	1	1	1	1	1	1	1	1	1	1	1	1	1	1	1	1	1	1	1	1	1	0	0	1	1	1	1	0	0
recenzie	SSfp1	NNFP1----------	NNFP1----------	NNFP1----------	NNFP1----------	NNFP1----------	NNFS2-----A----	NNFS2-----A----	0	1	1	1	1	1	1	1	1	1	1	1	1	1	1	1	1	1	1	1	1	1	1	0	0	1	1	1	1	0	0
Čo	PFns4	PDNS4----------	PDNS4----------	PDNS4----------	PDNS1----------	PDNS4----------	PQ--4----------	PQ--4----------	0	1	1	1	1	1	1	1	1	1	1	0	0	1	1	1	1			1	1	1	1			1	1	0	1	1	1
s	Eu7	RR--7----------	RR--7-----------	RR--7-----------	RR--7-----------	RR--7-----------	RR--7----------	RR--7----------	0	1	1	1	1	1	1	1	1	1	1	1	1													1	1	1	1	1	1
lístkami	SSip7	NNIP7----------	NNIP7----------	NNIP7----------	NNIP7----------	NNIP7----------	NNIP7-----A----	NNIP7-----A----	0	1	1	1	1	1	1	1	1	1	1	1	1	1	1	1	1	1	1	1	1	1	1	1	1	1	1	1	1	1	1
Pri	Eu6	RR--6----------	RR--6-----------	RR--6-----------	RR--6-----------	RR--6-----------	RR--6----------	RR--6----------	0	1	1	1	1	1	1	1	1	1	1	1	1													1	1	1	1	1	1
každom	PAns6	P4NS6----------	P4NS6----------	P4NS6----------	P4NS6----------	P4NS6----------	AANS6----1A----	AANS6----1A----	0	1	1	1	1	0	0	1	1	1	1	0	0	1	1	1	1	1	1	1	1	1	1	1	1	1	1	1	1	1	1
kine	SSns6	NNNS6----------	NNNS6----------	NNNS6----------	NNNS6----------	NNNS6----------	NNNS6-----A----	NNNS6-----A----	0	1	1	1	1	1	1	1	1	1	1	1	1	1	1	1	1	1	1	1	1	1	1	1	1	1	1	1	1	1	1
divadle	SSns6	NNNS6----------	NNNS6----------	NNNS6----------	NNNS6----------	NNNP1----------	NNNS6-----A----	NNNS6-----A----	0	1	1	1	1	1	1	1	1	1	1	1	1	1	1	1	1	1	1	1	1	1	0	1	1	1	1	1	0	1	1
klube	SSis6	NNIS6----------	NNIS6----------	NNIS6----------	NNIS6----------	NNIS6----------	NNIS6-----A----	NNIS6-----A----	0	1	1	1	1	1	1	1	1	1	1	1	1	1	1	1	1	1	1	1	1	1	1	1	1	1	1	1	1	1	1
je	VKesc+	VB-S---3P-AA---	V--S---3P-AA---	V--S---3P-AA---	V--S---3P-AA---	V--S---3P-AA---	VB-S---3P-AA---	VB-S---3P-AA---	0	1	1	1	1	1	1					1	1							1	1	1	1	1	1							1	1	1	1	1	1	1	1	1	1
aj	T	TT-------------	TT-------------	TT-------------	TT-------------	TT-------------	J^-------------	J^-------------	0	1	1	1	1	0	0	1	1	1	1	0	0
jeho	PUfs1	PZFS1----------	PZFS1----------	PZFS1----------	PZFS1----------	PZFS1----------	PSXXXIS3-------	PSXXXIS3-------	0	1	1	1	1	1	1	1	1	1	1	0	0	1	1	1	1	0	0	1	1	1	1	0	0	1	1	1	1	0	0
adresa	SSfs1	NNFS1----------	NNFS1----------	NNFS1----------	NNFS1----------	NNFS1----------	NNFS1-----A----	NNFS1-----A----	0	1	1	1	1	1	1	1	1	1	1	1	1	1	1	1	1	1	1	1	1	1	1	1	1	1	1	1	1	1	1
a	O	J^-------------	J^-------------	J^-------------	J^-------------	J^-------------	J^-------------	J^-------------	0	1	1	1	1	1	1	1	1	1	1	1	1
telefón	SSis1	NNIS1----------	NNIS1----------	NNIS1----------	NNIS1----------	NNIS1----------	NNIS1-----A----	NNIS1-----A----	0	1	1	1	1	1	1	1	1	1	1	1	1	1	1	1	1	1	1	1	1	1	1	1	1	1	1	1	1	1	1
Zavolajte	VMdpb+	V--P---2--AN---	V--P---2--AN---	V--P---2--AN---	V--P---2--AN---	V--P---2--AN---	Vi-P---2--A----	Vi-P---2--A----	0	1	1	1	1	1	1													1	1	1	1	1	1							1	1	1	1	1	1
a	O	J^-------------	J^-------------	J^-------------	J^-------------	J^-------------	J^-------------	J^-------------	0	1	1	1	1	1	1	1	1	1	1	1	1
rezervujte	VMjpb+	V--P---2--A----	V--P---2--A----	V--P---2--A----	V--P---2--AA---	V--P---2--A----	Vi-P---2--A----	Vi-P---2--A----	0	1	1	1	1	1	1													1	1	1	1	1	1							1	1	1	1	1	1
Skúste	VMdpb+	V--P---2--AN---	V--P---2--AN---	V--P---2--AN---	V--P---2--AN---	V--P---2--AN---	Vi-P---2--A----	Vi-P---2--A----	0	1	1	1	1	1	1													1	1	1	1	1	1							1	1	1	1	1	1
siahnuť	VId+	Vf--------AN---	Vf--------AN---	Vf--------AN---	Vf--------AN---	Vf--------AN---	Vf--------A----	Vf--------A----	0	1	1	1	1	1	1	1	1	1	1	1	1
po	Eu6	RR--6----------	RR--6-----------	RR--6-----------	RR--6-----------	RR--6-----------	RR--6----------	RR--6----------	0	1	1	1	1	1	1	1	1	1	1	1	1													1	1	1	1	1	1
nejakej	PAfs6	P4FS6----------	P4FS6----------	P4FS6----------	P4FS6----------	P4FS6----------	PZFS6----------	PZFS6----------	0	1	1	1	1	1	1	1	1	1	1	0	0	1	1	1	1	1	1	1	1	1	1	1	1	1	1	1	1	1	1
knižnej	AAfs6x	AAFS6----1-----	AAFS6----1-----	AAFS6----1-----	AAFS6----1-----	AAFS6----1-----	AAFS6----1A----	AAFS6----1A----	0	1	1	1	1	1	1	1	1	1	1	1	1	1	1	1	1	1	1	1	1	1	1	1	1	1	1	1	1	1	1
novinke	SSfs6	NNFS6----------	NNFS6----------	NNFS6----------	NNFS6----------	NNFS6----------	NNFS6-----A----	NNFS6-----A----	0	1	1	1	1	1	1	1	1	1	1	1	1	1	1	1	1	1	1	1	1	1	1	1	1	1	1	1	1	1	1
zoznam	SSis4	NNIS4----------	NNIS4----------	NNIS4----------	NNIS4----------	NNIS4----------	NNIS4-----A----	NNIS4-----A----	0	1	1	1	1	1	1	1	1	1	1	1	1	1	1	1	1	1	1	1	1	1	1	1	1	1	1	1	1	1	1
nájdete	VKdpb+	VB-P---2P-AN---	V--P---2P-AN---	V--P---2P-AN---	V--P---2P-AN---	V--P---2P-AN---	VB-P---2P-AA---	VB-P---2P-AA---	0	1	1	1	1	1	1					1	1							1	1	1	1	1	1							1	1	1	1	1	1	1	1	1	1
v	Eu6	RR--6----------	RR--6-----------	RR--6-----------	RR--6-----------	RR--6-----------	RR--6----------	RR--6----------	0	1	1	1	1	1	1	1	1	1	1	1	1													1	1	1	1	1	1
Knižnom	AAis6x:r	AAIS6----1-----	AAIS6----1-----	AAIS6----1-----	AAIS6----1-----	AAIS6----1-----	AAIS6----1A----	AAIS6----1A----	0	1	1	1	1	1	1	1	1	1	1	1	1	1	1	1	1	1	1	1	1	1	1	1	1	1	1	1	1	1	1
katalógu	SSis6	NNIS6----------	NNIS6----------	NNIS6----------	NNIS6----------	NNIS6----------	NNIS6-----A----	NNIS6-----A----	0	1	1	1	1	1	1	1	1	1	1	1	1	1	1	1	1	1	1	1	1	1	1	1	1	1	1	1	1	1	1
Alebo	O	J^-------------	J^-------------	J^-------------	J^-------------	J^-------------	J^-------------	J^-------------	0	1	1	1	1	1	1	1	1	1	1	1	1
si	R	J^-------------	J^-------------	J^-------------	J^-------------	J^-------------	P7-X3----------	P7-X3----------	0	1	1	1	1	0	0	1	1	1	1	0	0
ju	PFfs4	PDFS4----------	PDFS4----------	PDFS4----------	PDFS4----------	PDFS4----------	PPFS4--3-------	PPFS4--3-------	0	1	1	1	1	1	1	1	1	1	1	0	0	1	1	1	1	1	1	1	1	1	1	1	1	1	1	1	1	1	1
stiahnite	VMdpb+	V--P---2--AN---	V--P---2--AN---	V--P---2--AN---	V--P---2--AN---	V--P---2--AN---	Vi-P---2--A----	Vi-P---2--A----	0	1	1	1	1	1	1													1	1	1	1	1	1							1	1	1	1	1	1
v	Eu6	RR--6----------	RR--6-----------	RR--6-----------	RR--6-----------	RR--6-----------	RR--6----------	RR--6----------	0	1	1	1	1	1	1	1	1	1	1	1	1													1	1	1	1	1	1
súbore	SSis6	NNIS6----------	NNIS6----------	NNIS6----------	NNIS6----------	NNIS6----------	NNIS6-----A----	NNIS6-----A----	0	1	1	1	1	1	1	1	1	1	1	1	1	1	1	1	1	1	1	1	1	1	1	1	1	1	1	1	1	1	1
PDF	W	NNIS6----------	NNIS6----------	NNIS6----------	NNIS6----------	NNIS6----------	NNNXX-----A----	X@-------------	0	1	1	1	1	1	0	1	1	1	1	1	0	1	1	1	1	0		1	1	1	1	0		1	1	1	1	0
na	Eu6	RR--6----------	RR--6-----------	RR--6-----------	RR--6-----------	RR--6-----------	RR--6----------	RR--6----------	0	1	1	1	1	1	1	1	1	1	1	1	1													1	1	1	1	1	1
tej	PFfs6	PDFS6----------	PDFS6----------	PDFS6----------	PDFS6----------	PDFS6----------	PDFS6----------	PDFS6----------	0	1	1	1	1	1	1	1	1	1	1	1	1	1	1	1	1	1	1	1	1	1	1	1	1	1	1	1	1	1	1
istej	PAfs6	P4FS6----------	P4FS6----------	P4FS6----------	P4FS6----------	P4FS6----------	AAFS6----1A----	AAFS6----1A----	0	1	1	1	1	0	0	1	1	1	1	0	0	1	1	1	1	1	1	1	1	1	1	1	1	1	1	1	1	1	1
adrese	SSfs6	NNFS6----------	NNFS6----------	NNFS6----------	NNFS6----------	NNFS6----------	NNFS6-----A----	NNFS6-----A----	0	1	1	1	1	1	1	1	1	1	1	1	1	1	1	1	1	1	1	1	1	1	1	1	1	1	1	1	1	1	1
Prečo	PD	PY-------------	PY-------------	PY-------------	PY-------------	PY-------------	PY-------------	PY-------------	0	1	1	1	1	1	1	1	1	1	1	1	1
Publikáciu	SSfs4	NNFS4----------	NNFS4----------	NNFS4----------	NNFS4----------	NNFS4----------	NNFS4-----A----	NNFS4-----A----	0	1	1	1	1	1	1	1	1	1	1	1	1	1	1	1	1	1	1	1	1	1	1	1	1	1	1	1	1	1	1
napísal	VLdscm+	V-MS---3R-AN---	V-MS---3R-AN---	V-MS---3R-AN---	V-MS---3R-AN---	V-MS---3R-AN---	VpYS---XR-AA---	VpYS---XR-AA---	0	1	1	1	1	1	1							1	1	1	1	0	0	1	1	1	1	1	1							1	1	1	1	0	0	1	1	1	1
známy	AAms1x	AAMS1----1-----	AAMS1----1-----	AAMS1----1-----	AAMS1----1-----	AAMS1----1-----	AAMS1----1A----	AAMS1----1A----	0	1	1	1	1	1	1	1	1	1	1	1	1	1	1	1	1	1	1	1	1	1	1	1	1	1	1	1	1	1	1
český	AAms1x	AAMS1----1-----	AAMS1----1-----	AAMS1----1-----	AAMS1----1-----	AAMS1----1-----	AAMS1----1A----	AAMS1----1A----	0	1	1	1	1	1	1	1	1	1	1	1	1	1	1	1	1	1	1	1	1	1	1	1	1	1	1	1	1	1	1
novinár	SSms1	NNMS1----------	NNMS1----------	NNMS1----------	NNMS1----------	NNMS1----------	NNMS1-----A----	NNMS1-----A----	0	1	1	1	1	1	1	1	1	1	1	1	1	1	1	1	1	1	1	1	1	1	1	1	1	1	1	1	1	1	1
a	O	J^-------------	J^-------------	J^-------------	J^-------------	J^-------------	J^-------------	J^-------------	0	1	1	1	1	1	1	1	1	1	1	1	1
publicista	SSms1	NNMS1----------	NNMS1----------	NNMS1----------	NNMS1----------	NNMS1----------	NNMS1-----A----	NNMS1-----A----	0	1	1	1	1	1	1	1	1	1	1	1	1	1	1	1	1	1	1	1	1	1	1	1	1	1	1	1	1	1	1
Miloš	SSms1:r	NNMS1----------	NNMS1----------	NNMS1----------	NNMS1----------	NNMS1----------	NNMS1-----A----	NNMS1-----A----	0	1	1	1	1	1	1	1	1	1	1	1	1	1	1	1	1	1	1	1	1	1	1	1	1	1	1	1	1	1	1
Čermák	SSms1:r	NNMS1----------	NNMS1----------	NNMS1----------	NNMS1----------	NNMS1----------	NNMS1-----A----	X@-------------	0	1	1	1	1	1	0	1	1	1	1	1	0	1	1	1	1	1		1	1	1	1	1		1	1	1	1	1
Má	VKesc+	VB-S---3P-AA---	V--S---3P-AA---	V--S---3P-AA---	V--S---3P-AA---	V--S---3P-AA---	VB-S---3P-AA---	VB-S---3P-AA---	0	1	1	1	1	1	1					1	1							1	1	1	1	1	1							1	1	1	1	1	1	1	1	1	1
netradičnú	AAfs4x	AAFS4----1-----	AAFS4----1-----	AAFS4----1-----	AAFS4----1-----	AAFS4----1-----	AAFS4----1N----	AAFS4----1N----	0	1	1	1	1	1	1	1	1	1	1	1	1	1	1	1	1	1	1	1	1	1	1	1	1	1	1	1	1	1	1
grafickú	AAfs4x	AAFS4----1-----	AAFS4----1-----	AAFS4----1-----	AAFS4----1-----	AAFS4----1-----	AAFS4----1A----	AAFS4----1A----	0	1	1	1	1	1	1	1	1	1	1	1	1	1	1	1	1	1	1	1	1	1	1	1	1	1	1	1	1	1	1
podobu	SSfs4	NNFS4----------	NNFS4----------	NNFS4----------	NNFS4----------	NNFS4----------	NNFS4-----A----	NNFS4-----A----	0	1	1	1	1	1	1	1	1	1	1	1	1	1	1	1	1	1	1	1	1	1	1	1	1	1	1	1	1	1	1
a	O	J^-------------	J^-------------	J^-------------	J^-------------	J^-------------	J^-------------	J^-------------	0	1	1	1	1	1	1	1	1	1	1	1	1
svojimi	PFip7	PDIP7----------	PDIP7----------	PDIP7----------	PDIP7----------	PDIP7----------	P8XP7----------	P8XP7----------	0	1	1	1	1	1	1	1	1	1	1	0	0	1	1	1	1	0	0	1	1	1	1	1	1	1	1	1	1	1	1
malými	AAip7x	AAIP7----1-----	AAIP7----1-----	AAIP7----1-----	AAIP7----1-----	AAIP7----1-----	AAIP7----1A----	AAIP7----1A----	0	1	1	1	1	1	1	1	1	1	1	1	1	1	1	1	1	1	1	1	1	1	1	1	1	1	1	1	1	1	1
rozmermi	SSip7	NNIP7----------	NNIP7----------	NNIP7----------	NNIP7----------	NNIP7----------	NNIP7-----A----	NNIP7-----A----	0	1	1	1	1	1	1	1	1	1	1	1	1	1	1	1	1	1	1	1	1	1	1	1	1	1	1	1	1	1	1
sa	R	NNIP7----------	NNIP7----------	NNIP7----------	NNIP7----------	NNIP7----------	P7-X4----------	P7-X4----------	0	1	1	1	1	0	0	1	1	1	1	0	0	1	1	1	1			1	1	1	1	0	0	1	1	1	1	0	0
zmestí	VKdsc+	VB-S---3P-AN---	V--S---3P-AN---	V--S---3P-AN---	V--S---3P-AN---	V--S---3P-AN---	VB-S---3P-AA---	VB-S---3P-AA---	0	1	1	1	1	1	1					1	1							1	1	1	1	1	1							1	1	1	1	1	1	1	1	1	1
do	Eu2	RR--2----------	RR--2-----------	RR--2-----------	RR--2-----------	RR--2-----------	RR--2----------	RR--2----------	0	1	1	1	1	1	1	1	1	1	1	1	1													1	1	1	1	1	1
každej	PAfs2	P4FS2----------	P4FS2----------	P4FS2----------	P4FS2----------	P4FS2----------	AAFS2----1A----	AAFS2----1A----	0	1	1	1	1	0	0	1	1	1	1	0	0	1	1	1	1	1	1	1	1	1	1	1	1	1	1	1	1	1	1
tašky	SSfs2	NNFS2----------	NNFS2----------	NNFS2----------	NNFS2----------	NNFS2----------	NNFS2-----A----	NNFS2-----A----	0	1	1	1	1	1	1	1	1	1	1	1	1	1	1	1	1	1	1	1	1	1	1	1	1	1	1	1	1	1	1
a	O	J^-------------	J^-------------	J^-------------	J^-------------	J^-------------	J^-------------	J^-------------	0	1	1	1	1	1	1	1	1	1	1	1	1
ku	Ev3	RV--3----------	RV--3-----------	RV--3-----------	RV--3-----------	RV--3-----------	RV--3----------	RV--3----------	0	1	1	1	1	1	1	1	1	1	1	1	1													1	1	1	1	1	1
každému	PAis3	P4IS3----------	P4IS3----------	P4IS3----------	P4IS3----------	P4IS3----------	AAIS3----1A----	AAIS3----1A----	0	1	1	1	1	0	0	1	1	1	1	0	0	1	1	1	1	1	1	1	1	1	1	1	1	1	1	1	1	1	1
počítaču	SSis3	NNIS3----------	NNIS3----------	NNIS3----------	NNIS3----------	NNIS3----------	NNIS3-----A----	NNIS3-----A----	0	1	1	1	1	1	1	1	1	1	1	1	1	1	1	1	1	1	1	1	1	1	1	1	1	1	1	1	1	1	1
Základnými	AAfp7x	AAFP7----1-----	AAFP7----1-----	AAFP7----1-----	AAFP7----1-----	AAFP7----1-----	AAFP7----1A----	AAFP7----1A----	0	1	1	1	1	1	1	1	1	1	1	1	1	1	1	1	1	1	1	1	1	1	1	1	1	1	1	1	1	1	1
požiadavkami	SSfp7	NNFP7----------	NNFP7----------	NNFP7----------	NNFP7----------	NNFP7----------	NNFP7-----A----	NNFP7-----A----	0	1	1	1	1	1	1	1	1	1	1	1	1	1	1	1	1	1	1	1	1	1	1	1	1	1	1	1	1	1	1
na	Eu4	RR--4----------	RR--4-----------	RR--4-----------	RR--4-----------	RR--4-----------	RR--4----------	RR--4----------	0	1	1	1	1	1	1	1	1	1	1	1	1													1	1	1	1	1	1
všetky	PFip4	PDIP4----------	PDIP4----------	PDIP4----------	PDIP4----------	PDIP4----------	PLFP4----------	PLFP4----------	0	1	1	1	1	1	1	1	1	1	1	0	0	1	1	1	1	0	0	1	1	1	1	1	1	1	1	1	1	1	1
druhy	SSip4	NNIP4----------	NNIP4----------	NNIP4----------	NNIP4----------	NNIP4----------	NNIP4-----A----	NNIP4-----A----	0	1	1	1	1	1	1	1	1	1	1	1	1	1	1	1	1	1	1	1	1	1	1	1	1	1	1	1	1	1	1
podložiek	SSfp2	NNFP2----------	NNFP2----------	NNFP2----------	NNFP2----------	NNFP2----------	NNFP2-----A----	NNFP2-----A----	0	1	1	1	1	1	1	1	1	1	1	1	1	1	1	1	1	1	1	1	1	1	1	1	1	1	1	1	1	1	1
na	Eu4	RR--4----------	RR--4-----------	RR--4-----------	RR--4-----------	RR--4-----------	RR--4----------	RR--4----------	0	1	1	1	1	1	1	1	1	1	1	1	1													1	1	1	1	1	1
spanie	SSns4	NNNS4----------	NNNS4----------	NNNS4----------	NNNS4----------	NNNS4----------	NNNS4-----A----	NNNS4-----A----	0	1	1	1	1	1	1	1	1	1	1	1	1	1	1	1	1	1	1	1	1	1	1	1	1	1	1	1	1	1	1
sú	VKepc+	VB-P---3P-AA---	V--P---3P-AA---	V--P---3P-AA---	V--P---3P-AA---	V--P---3P-AA---	VB-P---3P-AA---	VB-P---3P-AA---	0	1	1	1	1	1	1					1	1							1	1	1	1	1	1							1	1	1	1	1	1	1	1	1	1
tepelná	AAfs1x	AAFS1----1-----	AAFS1----1-----	AAFS1----1-----	AAFS1----1-----	AAFS1----1-----	AAFS1----1A----	AAFS1----1A----	0	1	1	1	1	1	1	1	1	1	1	1	1	1	1	1	1	1	1	1	1	1	1	1	1	1	1	1	1	1	1
izolácia	SSfs1	NNFS1----------	NNFS1----------	NNFS1----------	NNFS1----------	NNFS1----------	NNFS1-----A----	NNFS1-----A----	0	1	1	1	1	1	1	1	1	1	1	1	1	1	1	1	1	1	1	1	1	1	1	1	1	1	1	1	1	1	1
a	O	J^-------------	J^-------------	J^-------------	J^-------------	J^-------------	J^-------------	J^-------------	0	1	1	1	1	1	1	1	1	1	1	1	1
izolácia	SSfs1	NNFS1----------	NNFS1----------	NNFS1----------	NNFS1----------	NNFS1----------	NNFS1-----A----	NNFS1-----A----	0	1	1	1	1	1	1	1	1	1	1	1	1	1	1	1	1	1	1	1	1	1	1	1	1	1	1	1	1	1	1
od	Eu2	RR--2----------	RR--2-----------	RR--2-----------	RR--2-----------	RR--2-----------	RR--2----------	RR--2----------	0	1	1	1	1	1	1	1	1	1	1	1	1													1	1	1	1	1	1
vlhkosti	SSfs2	NNFS2----------	NNFS2----------	NNFS2----------	NNFS2----------	NNFS2----------	NNFS2-----A----	NNFS2-----A----	0	1	1	1	1	1	1	1	1	1	1	1	1	1	1	1	1	1	1	1	1	1	1	1	1	1	1	1	1	1	1
Mimoriadne	Dx	Db-------1-----	Db-------1-----	Db-------1-----	Db-------1-----	Db-------1-----	Dg-------1A----	Dg-------1A----	0	1	1	1	1	1	1	1	1	1	1	0	0
príjemným	AAns7x	AANS7----1-----	AANS7----1-----	AANS7----1-----	AANS7----1-----	AANS7----1-----	AANS7----1A----	AANS7----1A----	0	1	1	1	1	1	1	1	1	1	1	1	1	1	1	1	1	1	1	1	1	1	1	1	1	1	1	1	1	1	1
spestrením	SSns7	NNNS7----------	NNNS7----------	NNNS7----------	NNNS7----------	NNNS7----------	NNNS7-----A----	NNNS7-----A----	0	1	1	1	1	1	1	1	1	1	1	1	1	1	1	1	1	1	1	1	1	1	1	1	1	1	1	1	1	1	1
je	VKesc+	VB-S---3P-AA---	V--S---3P-AA---	V--S---3P-AA---	V--S---3P-AA---	V--S---3P-AA---	VB-S---3P-AA---	VB-S---3P-AA---	0	1	1	1	1	1	1					1	1							1	1	1	1	1	1							1	1	1	1	1	1	1	1	1	1
izolácia	SSfs1	NNFS1----------	NNFS1----------	NNFS1----------	NNFS1----------	NNFS1----------	NNFS1-----A----	NNFS1-----A----	0	1	1	1	1	1	1	1	1	1	1	1	1	1	1	1	1	1	1	1	1	1	1	1	1	1	1	1	1	1	1
od	Eu2	RR--2----------	RR--2-----------	RR--2-----------	RR--2-----------	RR--2-----------	RR--2----------	RR--2----------	0	1	1	1	1	1	1	1	1	1	1	1	1													1	1	1	1	1	1
terénnych	AAfp2x	AAFP2----1-----	AAFP2----1-----	AAFP2----1-----	AAFP2----1-----	AAFP2----1-----	AAFP2----1A----	AAFP2----1A----	0	1	1	1	1	1	1	1	1	1	1	1	1	1	1	1	1	1	1	1	1	1	1	1	1	1	1	1	1	1	1
nerovností	SSfp2	NNFP2----------	NNFP2----------	NNFP2----------	NNFP2----------	NNFP2----------	NNFP2-----N----	NNFP2-----N----	0	1	1	1	1	1	1	1	1	1	1	1	1	1	1	1	1	1	1	1	1	1	1	1	1	1	1	1	1	1	1
Ocení	VKdsc+	VB-S---3P-AN---	V--S---3P-AN---	V--S---3P-AN---	V--S---3P-AN---	V--S---3P-AN---	VB-S---3P-AA---	VB-S---3P-AA---	0	1	1	1	1	1	1					1	1							1	1	1	1	1	1							1	1	1	1	1	1	1	1	1	1
ju	PFfs4	PDFS4----------	PDFS4----------	PDFS4----------	PDFS4----------	PDFS4----------	PPFS4--3-------	PPFS4--3-------	0	1	1	1	1	1	1	1	1	1	1	0	0	1	1	1	1	1	1	1	1	1	1	1	1	1	1	1	1	1	1
aj	T	TT-------------	TT-------------	TT-------------	TT-------------	TT-------------	J^-------------	J^-------------	0	1	1	1	1	0	0	1	1	1	1	0	0
princezná	SAfs1	NxFS1----------	NxFS1----------	NxFS1----------	NxFS1----------	NxFS1----------	NNFS1-----A----	NNFS1-----A----	0	1	1	1	1	1	1	1	1	1	1	0	0	1	1	1	1	1	1	1	1	1	1	1	1	1	1	1	1	1	1
na	Eu6	RR--6----------	RR--6-----------	RR--6-----------	RR--6-----------	RR--6-----------	RR--6----------	RR--6----------	0	1	1	1	1	1	1	1	1	1	1	1	1													1	1	1	1	1	1
hrášku	SSis6	NNIS6----------	NNIS6----------	NNIS6----------	NNIS6----------	NNIS6----------	NNIS6-----A----	NNIS6-----A----	0	1	1	1	1	1	1	1	1	1	1	1	1	1	1	1	1	1	1	1	1	1	1	1	1	1	1	1	1	1	1
Karimatky	SSfp1	NNFP1----------	NNFP1----------	NNFP1----------	NNFS1----------	NNFP1----------	NNFP1-----A----	X@-------------	0	1	1	1	1	1	0	1	1	1	1	1	0	1	1	1	1	1		1	1	0	1	1		1	1	1	1	1
Sú	VKepc+	VB-P---3P-AA---	V--P---3P-AA---	V--P---3P-AA---	V--P---3P-AA---	V--P---3P-AA---	VB-P---3P-AA---	VB-P---3P-AA---	0	1	1	1	1	1	1					1	1							1	1	1	1	1	1							1	1	1	1	1	1	1	1	1	1
ľahké	AAfp1x	AAFP1----1-----	AAFP1----1-----	AAFP1----1-----	AAFP1----1-----	AAFP1----1-----	AAFP1----1A----	AAIP1----1A----	0	1	1	1	1	1	1	1	1	1	1	1	1	1	1	1	1	1	0	1	1	1	1	1	1	1	1	1	1	1	1
a	O	J^-------------	J^-------------	J^-------------	J^-------------	J^-------------	J^-------------	J^-------------	0	1	1	1	1	1	1	1	1	1	1	1	1
praktické	AAfp1x	AAFP1----1-----	AAFP1----1-----	AAFP1----1-----	AAFP1----1-----	AAFP1----1-----	AAFP1----1A----	AAIP1----1A----	0	1	1	1	1	1	1	1	1	1	1	1	1	1	1	1	1	1	0	1	1	1	1	1	1	1	1	1	1	1	1
Odolné	AAfp1x	AAFP1----1-----	AAFP1----1-----	AAFP1----1-----	AAFP1----1-----	AAFP1----1-----	AANS1----1A----	AANS1----1A----	0	1	1	1	1	1	1	1	1	1	1	1	1	1	1	1	1	0	0	1	1	1	1	0	0	1	1	1	1	1	1
proti	Eu3	RR--3----------	RR--3-----------	RR--3-----------	RR--3-----------	RR--3-----------	RR--3----------	RR--3----------	0	1	1	1	1	1	1	1	1	1	1	1	1													1	1	1	1	1	1
drsnému	AAns3x	AANS3----1-----	AANS3----1-----	AANS3----1-----	AANS3----1-----	AANS3----1-----	AANS3----1A----	AANS3----1A----	0	1	1	1	1	1	1	1	1	1	1	1	1	1	1	1	1	1	1	1	1	1	1	1	1	1	1	1	1	1	1
zaobchádzaniu	SSns3	NNNS3----------	NNNS3----------	NNNS3----------	NNNS3----------	NNNS3----------	NNNS3-----A----	NNNS3-----A----	0	1	1	1	1	1	1	1	1	1	1	1	1	1	1	1	1	1	1	1	1	1	1	1	1	1	1	1	1	1	1
a	O	J^-------------	J^-------------	J^-------------	J^-------------	J^-------------	J^-------------	J^-------------	0	1	1	1	1	1	1	1	1	1	1	1	1
[truncated: 83,930 more rows]
[truncated: 20 more columns]
